# Supplementary material
Source: MDPI journal article supplement (https://www.mdpi.com/1424-2818/13/5/191)
Supplement: s1 [file diversity-1172470-supplementary.xlsx]

## Sheet: Bibliographic_information
ref_id	status	reviewed_by	row.names	AU	DE	ID	C1	AB	PA	AR	EM	book.author	book.group.author	BO	da	GA	DI	early.access.date	BE	eissn	esi.highly.cited.paper	esi.hot.paper	FU	FX	BN	SN	JI	SO	LA	meeting	month	note	NR	PN	oa	orcid.numbers	organization	PP	PU	SC	researcherid.numbers	SE	TC	TI	DT	usage.count.last.180.days	U2	VL	web.of.science.categories.
AY0000000000000002	included in review	Ada Sanchez	HARRIS JBC, 2017,	HARRIS JBC;TINGLEY MW;HUA F;YONG DL;ADENEY JM;LEE TM;MARTHY W;PRAWIRADILAGA DM;SEKERCIOGLU CH;SUYADI S;WINARNI N;WILCOVE DS	SUMATRA;ASIA;AVES;DECLINACI\'ON;DECLINE;EXTRACCION ILEGAL DE FAUNA;INDONESIA;MERCADO DE VIDA SILVESTRE;OVEREXPLOITATION;POBLACI\'ON SILVESTRE;SOBRE-EXPLOTACI\'ON;TRAMPEO;TRAPPING;WILD POPULATION;WILDLIFE TRADE	NA	NA	THE TRADE IN WILD ANIMALS INVOLVES ONE-THIRD OF THE WORLD'S BIRD SPECIES AND THOUSANDS OF OTHER VERTEBRATE SPECIES. ALTHOUGH A FEW SPECIES ARE IMPERILED AS A RESULT OF THE WILDLIFE TRADE, THE LACK OF FIELD STUDIES MAKES IT DIFFICULT TO GAUGE HOW SERIOUS A THREAT IT IS TO BIODIVERSITY. WE USED DATA ON CHANGES IN BIRD ABUNDANCES ACROSS SPACE AND TIME AND INFORMATION FROM TRAPPER INTERVIEWS TO EVALU…	NA	NA	NA	NA	NA	NA	NA	NA	10.1111/cobi.12729	NA	NA	NA	NA	NA	NA	NA	NA	1523-1739	NA	CONSERVATION BIOLOGY	NA	NA	NA	NA	NA	2	NA	NA	NA	394 -- 405	NA	NA	NA	NA	0	MEASURING THE IMPACT OF THE PET TRADE ON INDONESIAN BIRDS	NA	NA	NA	31	NA
AY0000000000000005	included in review	Ada Sanchez	RIVERA L, 2010,	RIVERA L;ROJAS LLANOS RAUL RLR;POLITI N;HENNESSEY B;BUCHER EH	AMAZONA TUCUMANA;CITES;MONTANE FOREST	NA	NA	THE TUCUM\'AN PARROT AMAZONA TUCUMANA IS RESTRICTED TO THE SOUTHERN YUNGAS MOUNTAINS, FROM SOUTH-EASTERN BOLIVIA TO NORTH-WESTERN ARGENTINA, AND HAS UNDERGONE INTENSE CAPTURE FOR THE PET TRADE. WE PROVIDE UPDATED INFORMATION ON THE STATUS OF THE BOLIVIAN POPULATION OF THE SPECIES AND PAST CAPTURE LEVELS FOR THE INTERNATIONAL PET TRADE. WE SURVEYED 18 SITES DURING THE NON-BREEDING SEASON IN 2006 A…	NA	NA	NA	NA	NA	NA	NA	NA	10.1017/S0030605309990950	NA	NA	NA	NA	NA	NA	NA	0030-6053	0030-6053	NA	ORYX	NA	NA	NA	NA	NA	NA	NA	NA	NA	NA	NA	NA	NA	NA	0	THE NEAR THREATENED TUCUM\'AN PARROT AMAZONA TUCUMANA IN BOLIVIA: INSIGHTS FOR A GLOBAL ASSESSMENT	NA	NA	NA	NA	NA
AY0000000000000007	rejected overview	Ada Sanchez	COLLAR NJ, 2000,	COLLAR NJ	AMENAZAS;AVES;COMERCIO ILEGAL;CONSERVACION;HABITAT;MANEJO	NA	NA	NINETY (26\%) OF THE WORLD'S PARROT SPECIES ARE THREATENED WITH EXTINCTION. WHILE THIS FIGURE WILL VARY WITH DETERIORATING CIRCUMSTANCES, TAXONOMIC INSIGHT AND ASSESSMENT OF NEW EVIDENCE, THE GREAT MAJORITY (CURRENTLY 93\%) OF THREATENED PARROTS ARE FOREST SPECIES, MOST (75 SPECIES, 83\%) HAVE POPULATIONS ESTIMATED AT LESS THAN 10 000 MATURE INDIVIDUALS, AND MANY (37 SPECIES, 41\%) HAVE RANGES \%…	NA	NA	NA	NA	NA	NA	NA	NA	10.1111/j.1748-1090.2000.tb00704.x	NA	NA	NA	NA	NA	NA	NA	1748-1090	NA	NA	INTERNATIONAL ZOO YEARBOOK	NA	NA	NA	NA	NA	1	NA	NA	NA	21--35	BLACKWELL PUBLISHING LTD	NA	NA	NA	0	GLOBALLY THREATENED PARROTS: CRITERIA, CHARACTERISTICS AND CURES	NA	NA	NA	37	NA
AY0000000000000008	rejected opinion	JRFP	KAHLER JS, 2020,	KAHLER JS	NA	NA	NA	THE ILLEGAL TRAFFICKING OF WILDLIFE IS A PROMINENT THREAT TO BIODIVERSITY, HUMAN HEALTH AND SECURITY, AND SUSTAINABLE DEVELOPMENT (GORE ET AL., 2019). THE TAXA AND GEOGRAPHIES IMPACTED ARE DIVERSE AS ARE THE SOCIO-ECONOMIC DRIVERS OF THIS ILLICIT TRADE. AS LEGAL AND ILLEGAL WILDLIFE MARKETS COMMINGLE AND VARIED TRADITIONAL USES OF WILDLIFE PERSIST, EVOLVE, AND CONVERGE ACROSS THE PLANET, THERE AR…	NA	NA	NA	NA	NA	NA	NA	NA	NA	NA	NA	NA	NA	NA	NA	NA	NA	NA	NA	ANIMAL CONSERVATION	NA	NA	NA	NA	NA	NA	NA	NA	NA	NA	NA	NA	NA	NA	0	ALARM CALL: INNOVATIVE STUDY HIGHLIGHTS THE NEED FOR ROBUST CONSERVATION CRIME SCIENCE TO EFFECTIVELY IMPEDE SPECIALIZED SONGBIRD TRAFFICKING	NA	NA	NA	THIS ISSUE	NA
AY0000000000000014	included in review	Ada Sanchez	CANT\'U GUZM\'AN J C CGJC, 2007,	CANT\'U GUZM\'AN J C CGJC;S\'ANCHEZ SALDA\~NA M E SSME;GROSSELET M;SILVE GAMEZ J SGJ	AVES;COMERCIO;CONSERVACION;COTORRAS;EXTRACCION ILEGAL DE FAUNA;MEXICO;PSITACIDOS;TRAFICO	NA	NA	MEXICO HAS 22 SPECIES OF PARROTS (PSITTACINES) OF W HICH SIX ARE ENDEMIC. WILD PARROTS ARE WIDESPREAD ACROSS THE COUNTRY AND HAVE A STRONG CONNECTION WITH MEXICAN CULTURE. ALL SPECIES EXCEPT TWO ARE OFFICIALLY LISTED AS AT RISK; 6 SPECIES ARE CLASSIFIED AS ENDANGERED, 10 AS THREATENED, AND 4 AS UNDER SPECIA L PROTECTION. THE FOREMOST THREATS PSITTACINES FACE IN MEXICO ARE LOSS OF HABITAT AND ILLE…	D.F., M\'EXICO	NA	NA	NA	NA	NA	NA	NA	NA	NA	NA	NA	NA	NA	NA	NA	NA	NA	NA	NA	NA	NA	NA	NA	NA	NA	NA	NA	NA	NA	DEFENDERS OF WILDLIFE	NA	NA	NA	0	THE ILLEGAL PARROT TRADE IN MEXICO. A COMPRENSIVE ASSESSMENT	NA	NA	NA	NA	NA
AY0000000000000015	rejected off topic parrots	Ada Sanchez	PATEL NG, 2015,	PATEL NG;RORRES C;JOLY DO;BROWNSTEIN JS;BOSTON R;LEVY MZ;SMITH G	AFRICA;ANALISIS DE REDES;ELEFANTES;EXTRACCION ILEGAL DE FAUNA;RINOCERONTES	NA	NA	INNOVATIVE APPROACHES ARE NEEDED TO COMBAT THE ILLEGAL TRADE IN WILDLIFE. HERE, WE USED NETWORK ANALYSIS AND A NEW DATABASE, HEALTHMAP WILDLIFE TRADE, TO IDENTIFY THE KEY NODES (COUNTRIES) THAT SUPPORT THE ILLEGAL WILDLIFE TRADE. WE IDENTIFIED KEY EXPORTERS AND IMPORTERS FROM THE NUMBER OF SHIPMENTS A COUNTRY SENT AND RECEIVED AND FROM THE NUMBER OF CONNECTIONS A COUNTRY HAD TO OTHER COUNTRIES OV…	NA	NA	NA	NA	NA	NA	NA	NA	10.1073/pnas.1500862112	NA	NA	NA	NA	NA	NA	NA	NA	1091-6490 (ELECTRONIC)	NA	PROCEEDINGS OF THE NATIONAL ACADEMY OF SCIENCES OF THE UNITED STATES OF AMERICA	ENG	NA	JUN	NA	NA	26	NA	NA	NA	7948--7953	NA	NA	NA	NA	0	QUANTITATIVE METHODS OF IDENTIFYING THE KEY NODES IN THE ILLEGAL WILDLIFE TRADE NETWORK	NA	NA	NA	112	NA
AY0000000000000016	rejected off topic parrots	Ada Sanchez	KAHLER JS, 2014,	KAHLER JS;GORE ML	AFRICAN BUFFALO;AFRICAN ELEPHANTS;CONSERVANCIES;CONSERVATION CRIMINOLOGY;HIPPOPOTAMUS;RETALIATION	NA	NA	HUMAN-WILDLIFE CONFLICT (HWC) INCLUDES HOW PEOPLE PERCEIVE RISKS ASSOCIATED WITH NEGATIVE INTERACTIONS WITH WILDLIFE. RISK PERCEPTIONS ARE IMPORTANT FOR CONSERVATIONISTS TO UNDERSTAND BECAUSE PERCEPTIONS CAN INFLUENCE HUMAN BEHAVIORS IN RESPONSE TO HWC, SUCH AS TOLERANCE OR POACHING SPECIFIC SPECIES. OUR STUDY SITE, THE ZAMBEZI REGION OF NAMIBIA, IS RENOWNED FOR DIVERSE WILDLIFE THAT COME INTO CO…	NA	NA	NA	NA	NA	NA	NA	NA	10.1016/j.biocon.2015.02.001	NA	NA	NA	NA	NA	NA	NA	NA	63207	NA	BIOLOGICAL CONSERVATION	NA	NA	NA	NA	NA	2017	NA	NA	NA	49--58	ELSEVIER LTD	NA	NA	NA	0	LOCAL PERCEPTIONS OF RISK ASSOCIATED WITH POACHING OF WILDLIFE IMPLICATED IN HUMAN-WILDLIFE CONFLICTS IN NAMIBIA	NA	NA	NA	189	NA
AY0000000000000020	rejected off topic parrots	Ada Sanchez	DULVY NK, 2017,	DULVY NK;SIMPFENDORFER CA;DAVIDSON LNK;FORDHAM SV;BR\"AUTIGAM A;SANT G;WELCH DJ	NA	NA	NA	SHARKS, RAYS, AND CHIMAERAS (CLASS CHONDRICHTHYES; HEREIN SHARKS') ARE THE EARLIEST EXTANT JAWED VERTEBRATES AND EXHIBIT SOME OF THE GREATEST FUNCTIONAL DIVERSITY OF ALL VERTEBRATES. ECOLOGICALLY, THEY INFLUENCE ENERGY TRANSFER VERTICALLY THROUGH TROPHIC LEVELS AND SOMETIMES TROPHIC CASCADES VIA DIRECT CONSUMPTION AND PREDATION RISK. THROUGH MOVEMENTS AND MIGRATIONS, THEY CONNECT HORIZONTALLY AND…	NA	NA	NA	NA	NA	NA	NA	NA	10.1016/j.cub.2017.04.038	NA	NA	NA	NA	NA	NA	NA	NA	9609822	NA	CURRENT BIOLOGY	NA	NA	NA	NA	NA	11	NA	NA	NA	R565--R572	NA	NA	NA	NA	0	CHALLENGES AND PRIORITIES IN SHARK AND RAY CONSERVATION	NA	NA	NA	27	NA
AY0000000000000024	rejected off topic parrots	Ada Sanchez	GOSS JR, 2013,	GOSS JR;CUMMING GS	EXTRACCION ILEGAL DE FAUNA;NETWORK ANALYSIS	NA	NA	THE RECENT EXPANSION OF THE GLOBAL WILDLIFE TRADE, BOTH WITHIN AND BETWEEN COUNTRIES, HAS MANY POTENTIALLY NEG- ATIVE ECOLOGICAL IMPACTS. EMERGING ECONOMIES, IN PARTICULAR, HAVE A LARGELY OVERLOOKED POTENTIAL FOR RAPID INTER- NAL GROWTH IN THIS TRADE. AN ANALYSIS OF \~17 000 WILDLIFE TRANSPORTATION PERMITS ISSUED IN SOUTH AFRICA PRIMARILY FOR COMMERCIAL PURPOSES BY THE WESTERN CAPE PROVINCE'S LOC…	NA	NA	NA	NA	NA	NA	NA	NA	10.1890/120213	NA	NA	NA	NA	NA	NA	NA	1540-9295	15409295	NA	FRONTIERS IN ECOLOGY AND THE ENVIRONMENT	NA	NA	NA	NA	NA	5	NA	NA	NA	243--250	NA	NA	NA	NA	0	NETWORKS OF WILDLIFE TRANSLOCATIONS IN DEVELOPING COUNTRIES: AN EMERGING CONSERVATION ISSUE?	NA	NA	NA	11	NA
AY0000000000000027	included in review	Ada Sanchez	SU S, 2015,	SU S;CASSEY P;VALL-LLOSERA M;BLACKBURN TM	ASIA;AVES;EXTRACCION ILEGAL DE FAUNA;TAIWAN	NA	NA	BACKGROUND: INTERNATIONAL WILDLIFE TRADE IS THE LARGEST EMERGING SOURCE OF VERTEBRATE INVASIVE ALIEN SPECIES. IN ORDER TO PREVENT INVASIONS, IT IS ESSENTIAL TO UNDERSTAND THE MECHANICS OF TRADE AND, IN PARTICULAR, WHICH TRADED SPECIES ARE MOST LIKELY TO BE RELEASED OR ESCAPE INTO THE WILD. A SPECIES' ECONOMIC VALUE IS A KEY FACTOR, BECAUSE WE EXPECT CHEAPER SPECIES TO BE LESS ASSIDUOUSLY SECURED …	NA	NA	NA	NA	NA	NA	NA	NA	10.1371/journal.pone.0127482	NA	NA	NA	NA	NA	NA	NA	1932-6203	19326203	NA	PLOS ONE	NA	NA	NA	NA	NA	5	NA	NA	NA	1--17	NA	NA	NA	NA	0	GOING CHEAP: DETERMINANTS OF BIRD PRICE IN THE TAIWANESE PET MARKET	NA	NA	NA	10	NA
AY0000000000000028	rejected off topic parrots	Ada Sanchez	CHUNWANG LI ZHIBIN MENG CLZM, 2015,	CHUNWANG LI ZHIBIN MENG CLZM	BEHAVIOR CHANGE MODELS;ILLEGAL WILDLIFE TRADE;MARKETING STRATEGY;UNDERSTANDING CONSUMER BEHAVIOR;BEHAVIOR CHANGE MODELS;EXTRACCION ILEGAL DE FAUNA;ILLEGAL WILDLIFE TRADE;MARKETING STRATEGY;SOCIAL MARKETING;UNDERSTANDING CONSUMER BEHAVIOR	NA	NA	CHINA HAS A HISTORY OF USING WILDLIFE OR FOR THEIR PARTS AND PRODUCTS, BUT NOW THE SUSTAINABILITY USE OF ENDANGERED MEDICINAL WILDLIFE FACE CHALLENGES. UNDERSTANDING THE BEHAVIORAL CHANGE AND MAKING EFFECTIVE BEHAVIORAL CHANGE APPROACHES AND STRATEGIES ARE ESSENTIAL TO STRENGTHEN DEMAND REDUCTION EFFORTS ON ENDANGERED WILDLIFE PRODUCTS IN CHINA. THE WORK DESCRIBED HOW WE CAN MAKE APPROACHES AND S…	NA	NA	NA	NA	NA	NA	NA	NA	10.4172/2332-2543.1000141	NA	NA	NA	NA	NA	NA	NA	NA	23322543	NA	JOURNAL OF BIODIVERSITY \& ENDANGERED SPECIES	NA	NA	NA	NA	NA	1	NA	NA	NA	1--3	NA	NA	NA	NA	0	CONSUMER BEHAVIOR CHANGE WE BELIEVE IN: DEMANDING REDUCTION STRATEGY FOR ENDANGERED WILDLIFE	NA	NA	NA	3	NA
AY0000000000000030	included in review	Ada Sanchez	ALVES R, 2013,	ALVES R	AVES;BRASIL;COMERCIO;EXTRACCION ILEGAL DE FAUNA;MASCOTAS	NA	NA	BRAZIL ' S RICH BIOLOGICAL AND CULTURAL DIVERSITY MAKES IT AN EXCEPTIONAL LOCATION FOR EXAMINING THE COMMERCE IN LIVE WILD BIRDS AND ITS IMPLICATIONS FOR CONSERVATION. THIS PAPER CATALOGUES THE LIVE BIRD SPECIES BEING TRADED IN BRAZIL, CHARACTERISES THE TRADE IN THESE ANIMALS, AND DISCUSSES THE IMPLICATIONS FOR AVIAN CONSERVATION. IN SPITE OF BEING ILLEGAL, CAPTURING AND SELLING BIRDS IS STILL A …	NA	NA	NA	NA	NA	NA	NA	NA	10.1017/S095927091200010X	NA	NA	NA	NA	NA	NA	NA	NA	NA	NA	BIRD CONSERVATION INTERNATIONAL	NA	NA	NA	NA	NA	2015	NA	NA	NA	53--65	NA	NA	NA	NA	0	THE LIVE BIRD TRADE IN BRAZIL AND ITS CONSERVATION IMPLICATIONS: AN OVERVIEW	NA	NA	NA	23	NA
AY0000000000000031	included in review	JRFP	EATON JA, 2017,	EATON JA;LEUPEN BTC;KRISHNASAMY K	AMAZONAS;AVES;EXTRACCION ILEGAL DE FAUNA;PSITACIDOS;SINGAPORE	NA	NA	SINGAPORE HAS A LONG HISTORY OF INVOLVEMENT IN THE BIRD TRADE. RECENT ANALYSIS OF THE TRADE IN CITES APPENDIX I AND II-LISTED BIRDS FROM OVER 30 COUNTRIES BETWEEN 2005 AND 2014, HIGHLIGHTS THAT SINGAPORE ISSUED COMMERCIAL IMPORT- AND EXPORT PERMITS FOR A TOTAL OF 225 561 AND 136 912 BIRDS RESPECTIVELY. THIS INVOLVED 212 SPECIES, OF WHICH 30 WERE CLASSIFIED BY THE IUCN AS VULNERABLE, ENDANGERED OR…	NA	NA	NA	NA	NA	NA	NA	NA	NA	NA	NA	NA	NA	NA	NA	NA	9789833393633	NA	NA	NA	NA	NA	NA	NA	NA	NA	NA	NA	NA	NA	TRAFFIC	NA	NA	NA	0	SONGSTERS OF SINGAPUR. AN OVERVIEW OF THE BIRD SPECIES IN SINGAPORE	NA	NA	NA	NA	NA
AY0000000000000032	included in review	Ada Sanchez	T SAS-ROLFES MICHAEL SRM, 2019,	T SAS-ROLFES MICHAEL SRM;CHALLENDER DWS;HINSLEY A;VER\'ISSIMO D;MILNER-GULLAND EJ	CITES;EXTRACCION ILEGAL DE FAUNA;POACHING;SPECIES CONSERVATION;SUSTAINABLE USE;WILDLIFE CRIME	NA	NA	ILLEGAL WILDLIFE TRADE (IWT) HAS INCREASED IN PROFILE IN RECENT YEARS AS A GLOBAL POLICY ISSUE, LARGELY BECAUSE OF ITS ASSOCIATION WITH DECLINES IN PROMINENT INTERNATIONALLY TRAFFICKED SPECIES. IN THIS REVIEW, WE EXPLORE THE SCALE OF IWT, ASSOCIATED THREATS TO BIODIVERSITY, AND APPROPRIATE RESPONSES TO THESE THREATS. WE DISCUSS THE HISTORICAL DEVELOPMENT OF IWT RESEARCH AND HIGHLIGHT THE UNCERTAI…	NA	NA	NA	NA	NA	NA	NA	NA	10.1146/annurev-environ-101718-033253	NA	NA	NA	NA	NA	NA	NA	NA	1543-5938	NA	ANNUAL REVIEW OF ENVIRONMENT AND RESOURCES	NA	NA	NA	NA	NA	1	NA	NA	NA	1--28	NA	NA	NA	NA	0	ILLEGAL WILDLIFE TRADE: PATTERNS, PROCESSES, AND GOVERNANCE	NA	NA	NA	44	NA
AY0000000000000033	rejected overview	Ada Sanchez	COONEY R, 2015,	COONEY R;KASTERINE A;MACMILLAN D;MILLEDGE S;NOSSAL K;ROE D;S. SRM	EXTRACCION ILEGAL DE FAUNA	NA	NA	THE INTERNATIONAL TRADE IN WILDLIFE HAS COMPLEX INTERACTIONS WITH PEOPLE AND THE ENVIRONMENT WHICH ARE OFTEN POORLY UNDERSTOOD. PLANT, ANIMAL AND FUNGI RESOURCES SUPPORT MILLIONS OF PEOPLE IN BOTH DEVELOPING AND DEVELOPED COUNTRIES. IN PARTICULAR, THE HARVEST AND TRADE OF WILDLIFE PRODUCTS IS A MAJOR COMPONENT OF THE LIVELIHOOD STRATEGIES FOR MANY POOR COMMUNITIES IN RURAL AND REMOTE AREAS. HOWEV…	GENEVA, SWITZERLAND	NA	NA	NA	NA	OCTOBER	NA	NA	NA	NA	NA	NA	NA	NA	NA	NA	NA	NA	NA	OCTOBER	NA	NA	NA	NA	NA	NA	NA	NA	NA	46	INTERNATIONAL TRADE CENTRE	NA	NA	NA	0	THE TRADE IN WILDLIFE: A FRAMEWORK TO IMPROVE BIODIVERSITY AND LIVELIHOOD OUTCOMES	NA	NA	NA	NA	NA
AY0000000000000035	included in review	Ada Sanchez	SANZ V, 2006,	SANZ V;RODR\'IGUEZ-FERRARO A	AVES;CONSERVACION;COTORRAS;FECUNDIDAD;PSITACIDOS;SOBREVIVENCIA;VENEZUELA	NA	NA	WE STUDIED THE BREEDING BIOLOGY OF THE YELLOW-SHOULDERED PARROT (AMAZONA BARBADENSIS) ON MARGARITA ISLAND FROM MARCH-AUGUST, 1990 TO 1999. THE TIMING OF THE DIFFERENT PHASES (EGG-LAYING, HATCHING, FLEDGING) WAS CONSISTENT OVER THE YEARS, EXCEPT DURING 1998 WHEN ALL PHASES WERE DELAYED. THE AVERAGE CLUTCH SIZE WAS 3.38 0.78 EGGS PER NEST, WITH A RANGE OF ONE TO FIVE EGGS PER CLUTCH, AND MOST EGGS …	NA	NA	NA	NA	NA	NA	NA	NA	http://www.jstor.org/stable/4123206	NA	NA	NA	NA	NA	NA	NA	NA	NA	NA	THE CONDOR	NA	NA	NA	NA	NA	1	NA	NA	NA	178--192	NA	NA	NA	NA	0	REPRODUCTIVE PARAMETERS AND PRODUCTIVITY OF THE YELLOW-SHOULDERED PARROT ON MARGARITA ISLAND, VENEZUELA: A LONG TERM STUDY	NA	NA	NA	108	NA
AY0000000000000036	included in review	Ada Sanchez	HANKS C, 2005,	HANKS C	AVES;CACERIA;CONSERVACION;EXTRACCION ILEGAL DE FAUNA;GUYANA;PROYECTO CARDENALITO;VENEZUELA	NA	NA	GOVERNMENTS AND INTERNATIONAL ORGANIZATIONS HAVE ATTEMPTED TO DEVELOP PREEMPTIVE REGULATORY REGIMES THAT PREVENT OVEREXPLOITATION IN THE WILD BIRD TRADE. MOST TRADE REGULATION FOCUSES ON INTERNATIONAL BORDERS, BUT MANAGING SUB-NATIONAL TRADE IS ONE OF THE GREATEST CHALLENGES IN WILD BIRD TRADE REGULATION. SUB-NATIONAL REGULATION WILL GREATLY BENEFIT FROM A BETTER UNDERSTANDING OF HOW THE TRADE WO…	AUSTIN. TEXAS	NA	NA	NA	NA	FACULTY OF THE GRADUATE SCHOOL	NA	NA	NA	NA	NA	NA	NA	NA	NA	NA	NA	NA	NA	FACULTY OF THE GRADUATE SCHOOL	NA	NA	NA	NA	NA	NA	NA	NA	NA	NA	UNIVERSITY OF TEXAS	NA	NA	NA	0	SPATIAL PATTERNS IN GUYANASS WILD BIRD TRADE	NA	NA	NA	NA	NA
AY0000000000000037	included in review	Ada Sanchez	RIBAS JM, 2014,	RIBAS JM;SIPINSKI EAB;SERAFINI PEREIRA PATRICIA SPP;LINDMAYER FERREIRA VIVIAN LFV;DE FREITAS RASO T\^ANIA FRT;PINTO AA	BRASIL;CHLAMYDIOSIS;COMERCIO;ECOSYSTEM HEALTH;EXTRACCION ILEGAL DE FAUNA;PSITTACINE BIRDS;WILDLIFE CONSERVATION	NA	NA	THE RED-TAILED AMAZON (AMAZONA BRASILIENSIS) IS A PARROT ENDEMIC TO THE COASTAL REGIONS OF THE SOUTHEAST BRAZIL. IT IS PART OF THE OFFICIAL LIST OF THREATENED BRAZILIAN SPECIES AND IS CONSIDERED VULNERABLE BY THE INTERNATIONAL UNION FOR CONSERVATION OF NATURE AND NATURAL RESOURCES. ILLEGAL TRADE AND HABITAT LOSS ARE THE MAIN THREATS TO THIS SPECIES. THUS, IMMEDIATE ACTIONS IN ORDER TO AVOID DECLI…	NA	NA	NA	NA	NA	NA	NA	NA	NA	NA	NA	NA	NA	NA	NA	NA	NA	NA	NA	ORNITHOLOGIA	NA	NA	NA	NA	NA	2	NA	NA	NA	144--147	NA	NA	NA	NA	0	CHLAMYDOPHILA PSITTACI ASSESSMENT IN THREATENED RED-TAILED AMAZON ( AMAZONA BRASILIENSIS ) PARROTS IN PARAN\'A , BRAZIL	NA	NA	NA	6	NA
AY0000000000000039	rejected overview	Ada Sanchez	RIBEIRO J, 2019,	RIBEIRO J;REINO L;SCHINDLER S;STRUBBE D;VALL-LLOSERA M;ARA\'UJO MB;CAPINHA C;CARRETE M;MAZZONI S;MONTEIRO M;MOREIRA F;ROCHA R;TELLA JL;VAZ AS;VICENTE J;NUNO A	BIOLOGICAL INVASIONS;CITES;CONSUMER BEHAVIOUR;EXPERT ELICITATION;GLOBAL WILDLIFE TRADE;INVASIVE SPECIES;AVES;EXTRACCION ILEGAL DE FAUNA	NA	NA	WILDLIFE TRADE IS A PROFITABLE ECONOMIC ACTIVITY. BIRDS ARE AMONG THE MOST HEAVILY TRADED ANIMALS WORLDWIDE, WITH NUMEROUS SPECIES THREATENED BY PET TRADE. INFORMATION ON BOTH LEGAL AND ILLEGAL ASPECTS OF TRADE AND CONSUMER DEMAND IS DIFFICULT TO OBTAIN ACROSS DIFFERENT COUNTRIES, PARTICULARLY GIVEN SUBSTANTIAL SOCIO-ECONOMIC AND CULTURAL VARIATION. FOCUSING ON CONSUMER DEMAND IN EACH COUNTRY, WE…	NA	NA	NA	NA	NA	NA	NA	NA	10.1007/s10531-019-01825-5	NA	NA	NA	NA	NA	NA	NA	123456789	15729710	NA	BIODIVERSITY AND CONSERVATION	NA	NA	NA	NA	NA	12	NA	NA	NA	3343--3369	NA	NA	NA	NA	0	TRENDS IN LEGAL AND ILLEGAL TRADE OF WILD BIRDS: A GLOBAL ASSESSMENT BASED ON EXPERT KNOWLEDGE	NA	NA	NA	28	NA
AY0000000000000041	included in review	Ada Sanchez	DAUT EF, 2015,	DAUT EF;BRIGHTSMITH DJ;PETERSON MJ	COMERCIO;EXTRACCION ILEGAL DE FAUNA;PERU	NA	NA	ILLEGAL TRADE IN WILD ANIMALS FOR PETS IS A GLOBAL CONSERVATION AND ANIMAL-WELFARE CONCERN. NON-GOVERNMENTAL ORGANIZATIONS (NGOS) WITH DIFFERENT PHILOSOPHICAL PERSPECTIVES TOWARD WILDLIFE WORK TO DECREASE ILLEGAL TRADE AT INTERNATIONAL AND NATIONAL LEVELS. OUR OBJECTIVE WAS TO EXAMINE THE EFFORTS OF CONSERVATION AND ANIMAL-WELFARE NGOS WORKING TO DECREASE ILLEGAL WILDLIFEPET TRADE FOR DOMESTIC MA…	NA	NA	NA	NA	NA	NA	NA	NA	10.1016/j.jnc.2014.10.005	NA	NA	NA	NA	NA	NA	NA	NA	16171381	NA	JOURNAL FOR NATURE CONSERVATION	NA	NA	NA	NA	NA	NA	NA	NA	NA	72--82	NA	NA	NA	NA	0	ROLE OF NON-GOVERNMENTAL ORGANIZATIONS IN COMBATING ILLEGAL WILDLIFEPET TRADE IN PERU	NA	NA	NA	24	NA
AY0000000000000042	included in review	Ada Sanchez	ALACS E, 2008,	ALACS E;GEORGES A	AUSTRALIA;PET TRADE;POACHING;WILDLIFE ENFORCEMENT;WILDLIFE LEGISLATION;WILDLIFE TRADE	NA	NA	AUSTRALIAN FLORA AND FAUNA ARE HIGHLY SOUGHT FOR THE INTERNATIONAL BLACK MARKET IN WILDLIFE. WITHIN AUSTRALIA, TRADE IN EXOTIC WILDLIFE SUPPLIES AVID HOBBYISTS. USING DATA ON WILDLIFE SEIZURES BY AUSTRALIAN CUSTOMS BETWEEN 2000 AND 2007 AND CASE PROSECUTIONS FROM 1994 TO 2007, WE ASSESSED THE SCALE AND ENFORCEMENT OF WILDLIFE CRIME IN AUSTRALIA. MOST SEIZURES WERE MINOR: LESS THAN 1\% RESULTING I…	NA	NA	NA	NA	NA	NA	NA	NA	10.1080/00450610802491382	NA	NA	NA	NA	NA	NA	NA	NA	450618	NA	AUSTRALIAN JOURNAL OF FORENSIC SCIENCES	NA	NA	NA	NA	NA	2	NA	NA	NA	147--160	NA	NA	NA	NA	0	WILDLIFE ACROSS OUR BORDERS: A REVIEW OF THE ILLEGAL TRADE IN AUSTRALIA	NA	NA	NA	40	NA
AY0000000000000043	included in review	Ada Sanchez	CHALLENDER DWS, 2015,	CHALLENDER DWS;HARROP SR;MACMILLAN DC	CITES;COMMUNITY CONSERVATION;COMPLIANCE;ECONOMICS;REGULATION;WILDLIFE TRADE;CONSERVACION;EXTRACCION ILEGAL DE FAUNA	NA	NA	INTERNATIONAL TRADE IN WILDLIFE IS A KEY THREAT TO BIODIVERSITY CONSERVATION. CITES, THE CONVENTION ON INTERNATIONAL TRADE IN ENDANGERED SPECIES OF WILD FAUNA AND FLORA, SEEKS TO ENSURE INTERNATIONAL WILDLIFE TRADE IS SUSTAINABLE, RELYING ON TRADE BANS AND CONTROLS. HOWEVER, THERE HAS BEEN LITTLE COMPREHENSIVE REVIEW OF ITS EFFECTIVENESS AND HERE WE REVIEW APPROACHES TAKEN TO REGULATE WILDLIFE TR…	NA	NA	NA	NA	NA	NA	NA	NA	10.1016/j.gecco.2014.11.010	NA	NA	NA	NA	NA	NA	NA	NA	2351-9894	NA	GLOBAL ECOLOGY AND CONSERVATION	NA	NA	NA	NA	NA	NA	NA	NA	NA	129--148	ELSEVIER B.V.	NA	NA	NA	0	TOWARDS INFORMED AND MULTI-FACETED WILDLIFE TRADE INTERVENTIONS	NA	NA	NA	3	NA
AY0000000000000045	included in review	Ada Sanchez	WESTON MK, 2009,	WESTON MK;MEMON M	AVES;COMERCIO;EL COMERCIO IL\'ICITO DE;EXTRACCION ILEGAL DE FAUNA;HYPOVITAMINOSIS A;LATIN AMERICA;LOROS EN AM\'ERICA LATINA;LOS LOROS;MALNOURISHMENT;PARA LA NUTRICI\'ON;PARROT CONSER-;PARROT TRADE;PSITACIDOS;SALUD Y CONSERVACI\'ON DE;VATION;Y SUS CONSECUENCIAS	NA	NA	SECOND ONLY TO THE TRAFFICKING OF NARCOTICS, THE ILLEGAL WILDLIFE TRADE IS BOOMING IN NEOTROPICAL COUNTRIES SUCH AS THOSE IN LATIN AMERICA WHICH ARE RICH IN THE DIVERSITY OF SOME OF THE WORLD'S MOST ENIGMATIC SPECIES. PARROTS ARE ONE OF THE SPECIES MOST AFFECTED BY THIS TRADE, WHICH HAS OCCURRED FOR OVER A THOUSAND YEARS BUT HAS BECOME ONE OF THE LEADING REASONS WHY SO MANY PARROT SPECIES ARE ON …	NA	NA	NA	NA	NA	NA	NA	NA	NA	NA	NA	NA	NA	NA	NA	NA	NA	NA	NA	BIRD POPULATIONS	NA	NA	NA	NA	NA	NA	NA	NA	NA	76--83	NA	NA	NA	NA	0	THE ILLEGAL PARROT TRADE IN LATIN AMERICA AND ITS CONSEQUENCES TO PARROT NUTRITION, HEALTH AND CONSERVATION	NA	NA	NA	9	NA
AY0000000000000046	included in review	Ada Sanchez	JENKS B, 2010,	JENKS B;VAUGHAN PW;BUTLER PJ	CAMBIO DE COMPORTAMIENTO;EXTRACCION ILEGAL DE FAUNA;PARROTS	NA	NA	RARE PRIDE IS A SOCIAL MARKETING PROGRAM THAT STIMULATES HUMAN BEHAVIOR CHANGE IN ORDER TO PROMOTE BIODIVERSITY CONSERVATION IN CRITICALLY THREATENED REGIONS IN DEVELOPING COUNTRIES. A SERIES OF FORMAL EVALUATION STUDIES, NETWORKING STRATEGIES, AND EVALUATIVE INQUIRIES HAVE DRIVEN A 20-YEAR PROCESS OF ADAPTIVE MANAGEMENT THAT HAS RESULTED IN EXTENSIVE PROGRAMMATIC CHANGES WITHIN PRIDE. THIS PAPER…	NA	NA	NA	NA	NA	NA	NA	NA	10.1016/j.evalprogplan.2009.07.010	NA	NA	NA	NA	NA	NA	NA	NA	NA	NA	EVALUATION AND PROGRAM PLANNING	NA	NA	NA	NA	NA	NA	NA	NA	NA	186--190	NA	NA	NA	NA	0	THE EVOLUTION OF RARE PRIDE: USING EVALUATION TO DRIVE ADAPTIVE MANAGEMENT IN A BIODIVERSITY CONSERVATION ORGANIZATION	NA	NA	NA	33	NA
AY0000000000000048	rejected overview	JRFP	S\'ANCHEZ-MERCADO A, 2016,	S\'ANCHEZ-MERCADO A;ASM\"USSEN M;RODR\'IGUEZ-CLARK KM;RODR\'IGUEZ JP;JEDRZEJEWSKI W	VENEZUELA;AVES;BOSQUES ALEATORIOS;CAZA FURTIVA;CAZA POR SUBSISTENCIA;EXTRACCION ILEGAL DE FAUNA;MAMIFEROS;MERCADO ILEGAL DE VIDA SILVESTRE;POACHING;RANDOM FOREST;REPTILES;SUBSISTENCE HUNTING;VENEZUELA;WILDLIFE ILLEGAL TRADE	NA	NA	ALTHOUGH MOST OFTEN CONSIDERED INDEPENDENTLY, SUBSISTENCE HUNTING, DOMESTIC TRADE, AND INTERNATIONAL TRADE AS COMPONENTS OF ILLEGAL WILDLIFE USE (IWU) MAY BE SPATIALLY CORRELATED. UNDERSTANDING HOW AND WHERE SUBSISTENCE AND COMMERCIAL USES MAY CO-OCCUR HAS IMPORTANT IMPLICATIONS FOR THE DESIGN AND IMPLEMENTATION OF EFFECTIVE CONSERVATION ACTIONS. WE ANALYZED PATTERNS IN THE JOINT GEOGRAPHICAL DIS…	NA	NA	NA	NA	NA	NA	NA	NA	10.1111/cobi.12744	NA	NA	NA	NA	NA	NA	NA	NA	15231739	NA	CONSERVATION BIOLOGY	NA	NA	NA	NA	NA	6	NA	NA	NA	1222--1232	NA	NA	NA	NA	0	USING SPATIAL PATTERNS IN ILLEGAL WILDLIFE USES TO REVEAL CONNECTIONS BETWEEN SUBSISTENCE HUNTING AND TRADE	NA	NA	NA	30	NA
AY0000000000000049	not available	Ada Sanchez	HILLE DC, 2013,	HILLE DC;WIEDENFELD DA;BRIGHTSMITH D;PATTEN M	AVES;CONSERVACION;MONITOREO;NICARAGUA;PSITACIDOS	NA	NA	THE NEOTROPICS ARE HOME TO A LARGE DIVERSITY OF THE AVIAN FAMILY PSITTACIDAE THAT EXPERIENCE GRAVE CONSERVATION ISSUES SUCH AS HABITAT LOSS AND CAPTURE FOR TRADE. OF THE SOME 159 SPECIES IN THE NEOTROPICS, HALF ARE THREATENED WHILE THE PLIGHT OF 9 HAVE ALREADY LED TO EXTINCTION. CONSERVATION EFFORTS, INCLUDING WORK TO QUANTIFY POPULATION TRENDS, ARE NEEDED TO ENSURE INFORMED CONSERVATION PLANNING…	SAN JOS\'E COSTA RICA	NA	NA	NA	NA	50TH ANNIVERSARY MEETING OF THE ASSOCIATION FOR TROPICAL BIOLOGY AND CONSERVATION \& ORGANIZATION FOR TROPICAL STUDIES	NA	NA	NA	NA	NA	NA	NA	NA	NA	NA	NA	NA	NA	50TH ANNIVERSARY MEETING OF THE ASSOCIATION FOR TROPICAL BIOLOGY AND CONSERVATION \& ORGANIZATION FOR TROPICAL STUDIES	NA	NA	NA	NA	NA	NA	NA	NA	NA	NA	NA	NA	NA	NA	0	A 20-YEAR POPULATION TREND ANALYSIS AND THE CONSERVATION OF NICARAGUAN PSITTACIDS	NA	NA	NA	NA	NA
AY0000000000000058	included in review	JRFP	SANZ V, 2003,	SANZ V;RODR\'IGUEZ-FERRARO A	AMAZONA BARBADENSIS;MARGARITA ISLAND;PSITTACIDAE;VENEZUELA;YELLOW-SHOULDERED PARROT;ARTIFICIAL NESTS;AVES;CONSERVACION;MANAGEMENT;MANEJO;VENEZUELA	NA	NA	THE USE OF ARTIFICIAL NESTS IS A MANAGEMENT TECHNIQUE USED TO INCREASE THE BREEDING POPULATION OF ENDANGERED PARROTS. AS PART OF A PROGRAM DEVOTED TO THE CONSERVATION OF THE YELLOW-SHOULDERED PARROT ( AMAZONA BARBADENSIS ) ON MARGARITA ISLAND, VENEZUELA, WE PLACED 16 WOODEN NESTS IN ONE OF THE SPECIES' BREEDING AREAS IN 1993. THE DIMENSIONS OF NEST BOXE S WERE BASED ON THE AVERAGE MEASUREMENTS OF…	NA	NA	NA	NA	NA	NA	NA	NA	NA	NA	NA	NA	NA	NA	NA	NA	NA	NA	NA	ORITOLOGIA NEOTROPICAL	NA	NA	NA	NA	NA	2015	NA	NA	NA	45--351	NA	NA	NA	NA	0	USE OF ARTIFICIAL NESTS BY THE YELLOW- SHOULDERED PARROT (AMAZONA BARBADENSIS)	NA	NA	NA	14	NA
AY0000000000000059	included in review	Ada Sanchez	BOUZAT JL, 2012,	BOUZAT JL;STREM RI	ANALISIS DE VIABILIDAD POBLACIONAL;AVES;AVP;BOLIVIA;CONSERVACION;EXTINCTION;PSITACIDOS;PSITTACIDAE;PVA;SAVANNA	NA	NA	WE DEVELOPED A DEMOGRAPHIC MODEL TO PERFORM A POPULATION VIABILITY ANALYSIS (PVA) OF THE BLUE-THROATED MA- CAW (ARA GLAUCOGULARIS), A CRITICALLY ENDANGERED SPECIES ENDEMIC TO BOLIVIA. PVA SIMULATIONS WERE RUN USING INDIVIDUAL- BASED (VORTEX 9.72) AND COHORT-BASED (RAMAS GIS 4.0) PROGRAMS. A BASELINE SIMULATION ALLOWED FOR THE ASSESSMENT OF THE STATUS OF THE SPECIES BASED ON ESTIMATES OF EXTINCTIO…	NA	NA	NA	NA	NA	NA	NA	NA	NA	NA	NA	NA	NA	NA	NA	NA	NA	NA	NA	BIOLOGICAL SCIENCES FACULTY PUBLICATIONS	NA	NA	NA	NA	NA	NA	NA	NA	NA	HTTP://SCHOLARWORKS.BGSU.EDU/BIO\_SCI\_PUB/5	NA	NA	NA	NA	0	POPULATION VIABILITY ANALYSIS OF THE BLUE-THROATED MACAW (ARA GLAUCOGULARIS ). USING INDIVIDUAL- BASED AND COHORT-BASED PVA PROGRAMS	NA	NA	NA	5	NA
AY0000000000000060	included in review	Ada Sanchez	SANTOS A, 2011,	SANTOS A;SATCHABUT T;VIGO TRAUCO GABRIELA VTG	COMERCIO ILEGAL;CONSERVACION;EXTRACCION ILEGAL DE FAUNA;IMPACTO	NA	NA	THE BILLION DOLLAR BUSINESSES OF BOTH LEGAL AND ILLEGAL WILDLIFE TRADE SHOW LITTLE DECLINE AND CONTINUE TO POSE MAJOR THREATS TO GLOBAL BIODIVERSITY. DESPITE INTERNATIONAL WILDLIFE TRADE BANS SUCH AS THE APPENDIX I LISTING OF THE CONVENTION ON INTERNATIONAL TRADE IN ENDANGERED SPECIES OF WILD FAUNA AND FLORA (CITES), THE ILLEGAL TRADE OF WILDLIFE UNDERMINES CONSERVATION EFFORTS. EVIDENCE HAS SHOW…	NA	NA	NA	NA	NA	NA	NA	NA	NA	NA	NA	NA	NA	NA	NA	NA	NA	NA	NA	APPLIED BIODIVERSITY PERSPECTIVE SERIES	NA	NA	NA	NA	NA	3	NA	NA	NA	1--15	NA	NA	NA	NA	0	DO WILDLIFE TRADE BANS ENHANCE OR UNDERMINE CONSERVATION EFFORTS?	NA	NA	NA	1	NA
AY0000000000000064	rejected off topic parrots	Ada Sanchez	S\'ANCHEZ-MERCADO A, 2020,	S\'ANCHEZ-MERCADO A;CARDOZO-URDANETA A;RODR\'IGUEZ-CLARK KM;MORAN L;OVALLE L;ARVELO M;MORALES-CAMPO J;COYLE B;BRAUN MJ	ANALISIS DE REDES;CARDENALITO;EXTRACCION ILEGAL DE FAUNA;VENEZUELA	NA	NA	THE CHALLENGES FACED BY SMALL ORGANIZATIONS CONFRONTING ILLE- GAL WILDLIFE TRADE (IWT) NETWORKS CAN BE LARGE AND FRIGHTEN- ING. IN A CONTEXT OF HIGH CORRUPTION, POLITICAL INSTABILITY AND SOCIAL UPHEAVAL, OBTAINING INFORMATION ABOUT ACTOR IDENTITIES, CONNECTIONS AND TRADE FLOWS MAY COME WITH RISKS TO PERSONAL SECURITY. YET IT IS PRECISELY IN THESE CONTEXTS THAT ILLEGAL WILDLIFE TRADE MAY FLOURISH,…	NA	NA	NA	NA	NA	NA	NA	NA	10.1111/acv.12587	NA	NA	NA	NA	NA	NA	NA	NA	NA	NA	ANIMAL CONSERVATION	NA	NA	NA	NA	NA	NA	NA	NA	NA	151--152	NA	NA	NA	NA	0	ILLEGAL WILDLIFE TRADE NETWORKS: FINDING CREATIVE OPPORTUNITIES FOR CONSERVATION INTERVENTION IN CHALLENGING CIRCUMSTANCES	NA	NA	NA	23	NA
AY0000000000000065	rejected overview	Ada Sanchez	PHELPS J, 2016,	PHELPS J;BIGGS D;WEBB EL	NA	NA	NA	ILLEGAL WILDLIFE TRADE (IWT) IS A GLOBAL CONSERVATION ISSUE THAT THREATENS THOUSANDS OF SPECIES, INCLUDING FISH, FUNGI, MEDICINAL PLANTS, AND CHARISMATIC MAMMALS. DESPITE WIDESPREAD RECOGNITION OF THE PROBLEM, DEBATES ON THE SCIENCE AND POLICY OF IWT GENERALLY CONCENTRATE ON A FEW HIGH-PROFILE SPECIES (EG RHINOCEROS, TIGERS, ELEPHANTS) AND OFTEN OVERLOOK OR CONFLATE COMPLEX IWT PRODUCTS, ACTORS, …	NA	NA	NA	NA	NA	NA	NA	NA	10.1002/fee.1325	NA	NA	NA	NA	NA	NA	NA	NA	15409309	NA	FRONTIERS IN ECOLOGY AND THE ENVIRONMENT	NA	NA	NA	NA	NA	9	NA	NA	NA	479--489	NA	NA	NA	NA	0	TOOLS AND TERMS FOR UNDERSTANDING ILLEGAL WILDLIFE TRADE	NA	NA	NA	14	NA
AY0000000000000066	rejected overview	Ada Sanchez	REUTER A, 2018,	REUTER A;KUNEN J;ROBERTON S	EXTRACCION ILEGAL DE FAUNA;PSITACIDOS;SURAMERICA	NA	NA	LATIN AMERICA IS THE SINGLE MOST BIOLOGICALLY DIVERSE REGION OF THE WORLD, AND TRADE IN ITS WILDLIFE, BOTH LEGAL AND ILLEGAL, HAS BEEN PREVALENT FOR HUNDREDS OF YEARS. THROUGH A VARIETY OF LAW AND POLICY RESPONSES, LATIN AMERICA'S WILDLIFE HAS ENDURED THREATS FROM ILLEGAL AND UNSUSTAINABLE COMMERCIAL TRADE BOTH DOMESTICALLY AND FROM THE US AND EUROPE. CURRENTLY, LATIN AMERICA'S RELATIONSHIP WITH …	NEW YORK, NY	NA	NA	NA	NA	NA	NA	NA	NA	NA	NA	NA	NA	NA	NA	NA	NA	NA	NA	NA	NA	NA	NA	NA	NA	NA	NA	NA	NA	NA	WCS	NA	NA	NA	0	AVERTING A CRISIS: WILDLIFE TRAFFICKING IN LATIN AMERICA	NA	NA	NA	NA	NA
AY0000000000000068	included in review	Ada Sanchez	HARFOOT M, 2018,	HARFOOT M;GLASER SAM;TITTENSOR DP;BRITTEN GL;MCLARDY C;MALSCH K;BURGESS ND	(10): CITES;CAPTIVE TRADE;SUSTAINABLE USE;TRADE PATTERNS;WILD TRADE;WILDLIFE TRADE;ASIA;CAMBIO DE COMPORTAMIENTO;ELEFANTE;EXTRACCION ILEGAL DE FAUNA;RINOCERONTE	NA	NA	WILDLIFE TRADE CAN PROVIDE COMMERCIAL INCENTIVES TO CONSERVE BIODIVERSITY BUT, IF UNSUSTAINABLE, CAN ALSO POSE A THREAT. CITES (CONVENTION ON INTERNATIONAL TRADE IN ENDANGERED SPECIES OF WILD FAUNA AND FLORA) AIMS TO ENSURE INTERNATIONAL TRADE IN CITES-LISTED SPECIES IS SUSTAINABLE, LEGAL AND TRACEABLE. HOWEVER, LARGE-SCALE TEMPORAL AND SPATIAL PATTERNS IN WILDLIFE TRADE ARE POORLY KNOWN. WE ADDR…	NA	NA	NA	NA	NA	NA	NA	NA	10.1016/j.biocon.2018.04.017	NA	NA	NA	NA	NA	NA	NA	NA	63207	NA	BIOLOGICAL CONSERVATION	NA	NA	NA	NA	NA	NA	NA	NA	NA	47--57	NA	NA	NA	NA	0	UNVEILING THE PATTERNS AND TRENDS IN 40 YEARS OF GLOBAL TRADE IN CITES-LISTED WILDLIFE	NA	NA	NA	223	NA
AY0000000000000073	included in review	Ada Sanchez	SILVA REGUEIRA RODRIGO F SRRF, 2012,	SILVA REGUEIRA RODRIGO F SRRF;BERNARD E	AVES;BRASIL;COMERCIO;CONSERVACION;EXTRACCION ILEGAL DE FAUNA;MONITOREO	NA	NA	ILLEGAL WILDLIFE TRADE IS A WIDESPREAD ACTIVITY WITH DIRECT IMPACTS ON BIODIVERSITY AND STREET MARKETS ARE FREQUENTLY POINTED OUT AS HOTSPOTS IN THE WILDLIFE TRADE ROUTE. HOWEVER, DUE TO ITS ILLEGAL CHARACTER, IT IS DIFFICULT TO ACCURATELY ESTIMATE HOW MANY INDIVIDUALS AND HOW MUCH MONEY ARE HANDLED BY TRADERS. PRECISE DATA ON THE NUMBER OF INDIVIDUALS AND SPECIES INVOLVED, AND THE DRIVERS BEHIND…	NA	NA	NA	NA	NA	NA	NA	NA	https://doi.org/10.1016/j.biocon.2012.02.009	NA	NA	NA	NA	NA	NA	NA	NA	NA	NA	BIOLOGICAL CONSERVATION	NA	NA	NA	NA	NA	1	NA	NA	NA	16--22	NA	NA	NA	NA	0	WILDLIFE SINKS: QUANTIFYING THE IMPACT OF ILLEGAL BIRD TRADE IN STREET MARKETS IN BRAZIL	NA	NA	NA	149	NA
AY0000000000000077	included in review	Ada Sanchez	UTERMOHLEN M, 2018,	UTERMOHLEN M;BAINE P	AVES;ENFORCEMENT;EXTRACCION ILEGAL DE FAUNA;LEGISLACION;MAMIFEROS;MONITOREO;REPTILES;VIGILANCIA	NA	NA	ENVIRONMENTAL CRIME IS ESTIMATED TO BE WORTH BETWEEN \$91 AND 258 BILLION, WITH WILDLIFE CRIME MAKING UP \$7 TO 23 BILLION OF THE TOTAL,I AND IS CURRENTLY ESTIMATED TO BE GROWING AT TWO TO THREE TIMES THE SPEED OF THE GLOBAL ECONOMY.II OVER THE PAST FEW YEARS, MYRIAD STUDIES AND REPORTS HAVE EXAMINED THE ECONOMIC AND ENVIRONMENTAL DEVASTATION WREAKED BY WILDLIFE CRIME, AS WELL AS ITS INTERTWINING…	WASHINGTON DC, USA	NA	NA	NA	NA	NA	NA	NA	NA	NA	NA	NA	NA	NA	NA	NA	NA	NA	NA	NA	NA	NA	NA	NA	NA	NA	NA	NA	NA	NA	CENTER FOR ADVANCED DEFENSE STUDIES (C4ADS)	NA	NA	NA	0	FLYING UNDER THE RADAR. WILDLIFE TRAFFICKING IN THE AIR TRANSPORT SECTOR	NA	NA	NA	NA	NA
AY0000000000000079	included in review	Ada Sanchez	TAMALENE MN, 2019,	TAMALENE MN;KARTIKA SH	EXTRACCION ILEGAL DE FAUNA;INDONESIA;LEARNING;METACOGNITIVE;PBL;PROBLEM BASED;PSITACIDOS;SCIENCE	NA	NA	PARROT INCLUDES IN AVES CLASS AND PSITTACIFORMES ORDER. IN INDONESIA, PARROT IS KNOWN BY THEIR LOCAL SPECIES NAMES SUCH AS NURI (TRUE PARROT), KAKATUA (COCKATOO), AND PERKICI (LORIINI). PARROT CAN BE FOUND ALMOST IN ALL TYPE OF HABITAT IN HALMAHERA ISLAND, MALUKU UTARA PROVINCE, FROM MANGROVE TO TROPICAL RAINFOREST IN LOWLANDS AND HIGHLANDS. THE RESEARCH AIMS TO DESCRIBE COMMUNITY ACTIVITIES IN T…	NA	NA	NA	NA	NA	NA	NA	NA	NA	NA	NA	NA	NA	NA	NA	NA	NA	NA	NA	BIOSFER: JURNAL PENDIDIKAN BIOLOGI	NA	NA	NA	NA	NA	1	NA	NA	NA	24 -- 33	NA	NA	NA	NA	0	LOCAL KNOWLEDGE AND COMMUNITY BEHAVIOR IN THE EXPLOITATION OF PARROT IN SURROUNDING AREA OF AKETAJAWE LOLOBATA NATIONAL PARK	NA	NA	NA	12	NA
AY0000000000000083	rejected overview	Ada Sanchez	BROAD S, 2003,	BROAD S;MULLIKEN T;ROE D	COMERCIO ILEGAL;CONSERVACION;EXTRACCION ILEGAL DE FAUNA;FAUNA;MANEJO	NA	NA	NA	LONDON, UK	NA	NA	NA	NA	THE TRADE IN WILDLIFE: REGULATION FOR CONSERVATION	NA	NA	NA	NA	OLDFIELD, S	NA	NA	NA	NA	NA	NA	NA	NA	THE TRADE IN WILDLIFE: REGULATION FOR CONSERVATION	NA	NA	NA	NA	NA	NA	NA	NA	NA	3--22	EARTHSCAN	NA	NA	NA	0	THE NATURE AND EXTENT OF LEGAL AND ILLEGAL TRADE IN WILDLIFE	NA	NA	NA	NA	NA
AY0000000000000084	included in review	Ada Sanchez	BAKER NE, 1991,	BAKER NE	AVES;COMERCIO;EXTRACCION ILEGAL DE FAUNA;TANZANIA	NA	NA	NA	DAAR ES SALAAM, TANZANIA	NA	NA	NA	NA	THE LIVE BIRD TRADE IN TANZANIA	NA	NA	NA	NA	NA	NA	NA	NA	NA	NA	2831703654	NA	NA	THE LIVE BIRD TRADE IN TANZANIA	NA	NA	NA	NA	NA	16	NA	NA	NA	31	LUCN SPECIES SURVIVAL COMMISSION	NA	NA	NA	0	THE LIVE BIRD TRADE IN TANZANIA	NA	NA	NA	NA	NA
AY0000000000000087	rejected overview	Ada Sanchez	BIRD TRADE SUBCOMMITTEE OF THE AOU CONSERVATION COMMITTEE BTSAOUCC, 1991,	BIRD TRADE SUBCOMMITTEE OF THE AOU CONSERVATION COMMITTEE BTSAOUCC	AVES;COMERCIO;EXTRACCION ILEGAL DE FAUNA;ICLE	NA	NA	NA	NA	NA	NA	NA	NA	NA	NA	NA	10.1017/CBO9781107415324.004	NA	NA	NA	NA	NA	NA	NA	9788578110796	1098-6596	NA	THE AUK	NA	NA	NA	NA	NA	4	NA	NA	NA	982--984	NA	NA	NA	NA	0	THE CONSERVATION CRISIS: INTERNATIONAL TRADE IN LIVE EXOTIC BIRDS CREATES A VAST MOVEMENT THAT MUST BE HALTED	NA	NA	NA	108	NA
AY0000000000000088	included in review	Ada Sanchez	BUDIANI I, 2018,	BUDIANI I;RAHARNINGRUM F	ASIA;EXTRACCION ILEGAL DE FAUNA;PSITACIDOS	NA	NA	NA	NA	NA	NA	NA	NA	NA	NA	NA	NA	NA	NA	NA	NA	NA	NA	NA	NA	NA	NA	NA	NA	NA	NA	NA	NA	NA	NA	NA	NA	1--12	NA	NA	NA	NA	0	ILLEGAL ONLINE TRADE IN INDONESIAN PARROTS	NA	NA	NA	NA	NA
ISI000071459200003	rejected off topic illegal trade	Ada Sanchez	CURRO TG, 1998, SEMIN AVIAN EXOT PET MED	CURRO TG	AVIAN; ANESTHESIA; PSITTACIFORME; PASSERIFORME; RESTRAINT	INTRAOSSEOUS CANNULATION	CURRO, TG (CORRESPONDING AUTHOR), 4326 DEVOLIS PKY, MADISON, WI 53711 USA.; DANE CTY HUMANE SOC, WESTSIDE FAMILY PET CLIN, MADISON, WI USA.	IT IS COMMON FOR VETERINARIANS WHO SPECIALIZE IN SMALL ANIMALS AND SPECIES TO BE PRESENTED WITH PET BIRD PATIENTS FOR PROCEDURES THAT REQUIRE GENERAL ANESTHESIA, INCLUDING COMPLETE PHYSICAL EXAMINATION, VENIPUNCTURE, DIAGNOSTIC WORKUP, OR MEDICAL AND SURGICAL TREATMENTS. THE BASIC PRINCIPLES OF ANESTHETIC MANAGEMENT THAT GOVERN MAMMALIAN ANESTHESIA ALSO APPLY TO BIRDS, ALTHOUGH SPECIFIC ANATOMIC …	1600 JOHN F KENNEDY BOULEVARD, STE 1800, PHILADELPHIA, PA 19103-2899 USA	NA	NA	NA	NA	NA	2020-10-26	YR109	10.1016/S1055-937X(98)80053-4	NA	NA	NA	NA	NA	NA	NA	NA	1055-937X	SEMIN. AVIAN EXOT. PET MED.	SEMINARS IN AVIAN AND EXOTIC PET MEDICINE	ENGLISH	NA	JAN	NA	49	1	NA	NA	NA	10-21	W B SAUNDERS CO-ELSEVIER INC	VETERINARY SCIENCES	NA	NA	21	ANESTHESIA OF PET BIRDS	ARTICLE	0	6	7	VETERINARY SCIENCES
ISI000071799300024	rejected off topic illegal trade	JRFP	MORABIA A, 1998, BR J CANCER	MORABIA A;STELLMAN S;LUMEY LH;WYNDER EL	LUNG CANCER; SMOKING; PET BIRD; CASE-CONTROL STUDY	INDEPENDENT RISK FACTOR; PET BIRDS	MORABIA, A (CORRESPONDING AUTHOR), UNIV HOSP GENEVA, DIV CLIN EPIDEMIOL, RUE MICHELI DU CREST 25, CH-1211 GENEVA 14, SWITZERLAND.; UNIV HOSP GENEVA, DIV CLIN EPIDEMIOL, CH-1211 GENEVA 14, SWITZERLAND.; AMER HLTH FDN, DIV EPIDEMIOL, NEW YORK, NY 10017 USA.	THE RELATIONSHIP BETWEEN PET BIRD KEEPING AND LUNG CANCER ACCORDING TO EXPOSURE TO TOBACCO SMOKING WAS INVESTIGATED IN A CASE-CONTROL STUDY IN HOSPITALS OF NEW YORK CITY AND WASHINGTON, DC, USA. NEWLY DIAGNOSED LUNG CANCER CASES (N = 887) AGED 40-79 YEARS WERE COMPARED WITH 1350 CONTROLS WITH DISEASES NOT RELATED TO SMOKING, OF THE SAME AGE, GENDER AND DATE OF ADMISSION AS THE CASES. THE PREVALEN…	JOURNAL PRODUCTION DEPT, ROBERT STEVENSON HOUSE, 1-3 BAXTERS PLACE, LEITH WALK, EDINBURGH EH1 3AF, MIDLOTHIAN, SCOTLAND	NA	NA	NA	NA	NA	2020-10-26	YV199	10.1038/bjc.1998.80	NA	NA	NA	NA	NA	NCI NIH HHSUNITED STATES DEPARTMENT OF HEALTH \& HUMAN SERVICESNATIONAL INSTITUTES OF HEALTH (NIH) - USANIH NATIONAL CANCER INSTITUTE (NCI) [CA-17613, CA-32617, CA-68384] FUNDING SOURCE: MEDLINE	NA	NA	0007-0920	BR. J. CANCER	BRITISH JOURNAL OF CANCER	ENGLISH	NA	FEB	NA	9	3	BRONZE, GREEN PUBLISHED	NA	NA	501-504	CHURCHILL LIVINGSTONE	ONCOLOGY	NA	NA	9	PARAKEETS, CANARIES, FINCHES, PARROTS AND LUNG CANCER: NO ASSOCIATION	ARTICLE	0	0	77	ONCOLOGY
ISI000072415600012	rejected off topic illegal trade	Ada Sanchez	KRAUTWALD-JUNGHANNS ME, 1998, TIERARZTL PRAX AUSG KLEINTIERE HEIMTIERE-a	KRAUTWALD-JUNGHANNS ME;SCHUHMACHER F;SOHN HG	PSITTACIFORMES; COMPUTED TOMOGRAPHY; LOWER RESPIRATORY TRACT	NA	KRAUTWALD-JUNGHANNS, ME (CORRESPONDING AUTHOR), UNIV GIESSEN, INST GEFLUGELKRANKHEITEN, POLIKLIN VOGEL \& REPTILIEN, FRANKFURTER STR 87, D-35392 GIESSEN, GERMANY.; KLINIKUM JUSTUS LIEBIG UNIV GIESSEN, INST GEFLUGELKRANKHEITEN, GIESSEN, GERMANY.; KLINIKUM JUSTUS LIEBIG UNIV GIESSEN, ZENTRUM RADIOL CHIRURG, GIESSEN, GERMANY.	THE NUMBER OF PSITTACINES KEPT AS PETS IS RAPIDLY INCREASING IN GERMANY. THE MAIN CAUSE OF DISEASE AND DEATH IN THESE AND OTHER TROPICAL BIRDS ARE RESPIRATORY TRACT AFFECTIONS. YET, A LACK OF CONSOLIDATED, SYSTEMATIC RESEARCH ON THE ANATOMY AND PATHOLOGY OF THESE AFFECTIONS IN GRAY PARROTS AND AMAZONS STILL WIDELY PERSISTS. IN A FIRST STEP EXAMINATIONS ON THE ANATOMY OF THE RESPIRATORY TRACT OF G…	P O BOX 10 45 45, LENZHALDE 3, D-70040 STUTTGART, GERMANY	NA	NA	NA	NA	NA	2020-10-26	ZA923	NA	NA	NA	NA	NA	NA	NA	NA	NA	1434-1239	TIERARZTL. PRAX. AUSG. KLEINTIERE HEIMTIERE	TIERARZTLICHE PRAXIS AUSGABE KLEINTIERE HEIMTIERE	GERMAN	NA	FEB	NA	30	1	NA	NA	NA	77-86	F K SCHATTAUER VERLAG GMBH	VETERINARY SCIENCES	NA	NA	0	EXAMINATION OF THE LOWER RESPIRATORY TRACT OF PSITTACIFORMES BY MEANS OF COMPUTED TOMOGRAPHY. PART 1: EXAMINATION OF HEALTHY BIRDS	ARTICLE	0	1	26	VETERINARY SCIENCES
ISI000072684300006	rejected off topic illegal trade	Ada Sanchez	DOWNS CT, 1997, AUST J ZOOL	DOWNS CT	NA	FEEDING-TERRITORY SIZE; NECTAR CHARACTERISTICS; FLORAL NECTAR; BIRD;; HUMMINGBIRDS; BEHAVIOR; BIOLOGY	DOWNS, CT (CORRESPONDING AUTHOR), UNIV KWAZULU NATAL, DEPT ZOOL \& ENTOMOL, PRIVATE BAG X01, ZA-3209 PIETERMARITZBURG, SOUTH AFRICA.; UNIV KWAZULU NATAL, DEPT ZOOL \& ENTOMOL, ZA-3209 PIETERMARITZBURG, SOUTH AFRICA.	THE RED LORY, EOS BORNEA (FAMILY PSITTACIDAE), WAS TESTED TO DETERMINE ITS PREFERENCE FOR HEXOSE SUGARS OR SUCROSE. THE INDICES OF SUGAR PREFERENCE USED WERE (A) NUMBER OF VISITS TO FEEDERS, (B) TIME SPENT FEEDING AND (C) VOLUME OF SOLUTION DRUNK. THE RED LORY SHOWED NO PREFERENCE FOR A SPECIFIC SUGAR WHEN OFFERED A CHOICE OF GLUCOSE, FRUCTOSE AND SUCROSE AT A CONCENTRATION OF 0.73 MOL L(-1). HOW…	150 OXFORD ST, PO BOX 1139, COLLINGWOOD, VICTORIA 3066, AUSTRALIA	NA	NA	NA	NA	NA	2020-10-26	ZD429	10.1071/ZO97034	NA	NA	NA	NA	NA	NA	NA	NA	0004-959X	AUST. J. ZOOL.	AUSTRALIAN JOURNAL OF ZOOLOGY	ENGLISH	NA	NA	NA	31	6	NA	DOWNS, COLLEEN/0000-0001-8334-1510	NA	613-619	CSIRO PUBLISHING	ZOOLOGY	DOWNS, COLLEEN/A-7770-2010	NA	16	SUGAR PREFERENCE AND APPARENT SUGAR ASSIMILATION IN THE RED LORY	ARTICLE	1	2	45	ZOOLOGY
ISI000074177900041	rejected off topic illegal trade	Ada Sanchez	MORONEY JF, 1998, CLIN INFECT DIS	MORONEY JF;GUEVARA R;IVERSON C;CHEN FM;SKELTON SK;MESSMER TO;PLIKAYTIS B;WILLIAMS PO;BLAKE JC	NA	RESPIRATORY-TRACT; PNEUMONIAE; ORNITHOSIS; STRAIN; TWAR	MORONEY, JF (CORRESPONDING AUTHOR), CTR DIS CONTROL \& PREVENT, RESP DIS BRANCH, PUBL HLTH SERV, US DEPT HHS, 1600 CLIFTON RD,MAILSTOP C-23, ATLANTA, GA 30333 USA.; CTR DIS CONTROL \& PREVENT, RESP DIS BRANCH, PUBL HLTH SERV, US DEPT HHS, ATLANTA, GA 30333 USA.; GEORGIA DEPT HUMAN RESOURCES, ATLANTA, GA USA.; GEORGIA DEPT AGR, ATLANTA, GA USA.	AVIAN CHLAMYDIOSIS WAS DETECTED IN A SHIPMENT OF >700 PET BIRDS FROM A FLORIDA BIRD DISTRIBUTOR THAT WERE SOLD TO NINE ATLANTA-AREA PET STORES IN AUGUST 1995. RESPIRATORY ILLNESS AMONG PERSONS WHO HAD RECENTLY ACQUIRED BIRDS FROM THIS SHIPMENT WAS REPORTED TO LOCAL PUBLIC HEALTH OFFICIALS. THE ATTACK RATE OF ACUTE RESPIRATORY ILLNESS WAS 10.7\% AMONG PERSONS IN HOUSEHOLDS EXPOSED TO BIRDS FROM TH…	5801 S ELLIS AVENUE, CHICAGO, IL 60637 USA	NA	NA	NA	NA	NA	2020-10-26	ZU252	10.1086/516368	NA	NA	NA	NA	NA	NA	NA	NA	1058-4838	CLIN. INFECT. DIS.	CLINICAL INFECTIOUS DISEASES	ENGLISH	NA	JUN	36TH INTERSCIENCE CONFERENCE ON ANTIMICROBIAL AGENTS AND CHEMOTHERAPY, NEW ORLEANS, LOUISIANA, SEP 15-18, 1996	28	6	BRONZE	NA	AMER SOC MICROBIOL	1425-1429	UNIV CHICAGO PRESS	IMMUNOLOGY; INFECTIOUS DISEASES; MICROBIOLOGY	NA	NA	42	DETECTION OF CHLAMYDIOSIS IN A SHIPMENT OF PET BIRDS, LEADING TO RECOGNITION OF AN OUTBREAK OF CLINICALLY MILD PSITTACOSIS IN HUMANS	ARTICLE; PROCEEDINGS PAPER	0	5	26	IMMUNOLOGY; INFECTIOUS DISEASES; MICROBIOLOGY
ISI000074823400002	rejected off topic illegal trade	Ada Sanchez	HARPER EJ, 1998, SEMIN AVIAN EXOT PET MED	HARPER EJ;SKINNER ND	NUTRITION; PSITTACINES; PASSERINES; FEEDING; AVIAN	IRON OVERLOAD; ENERGY; BIRDS	HARPER, EJ (CORRESPONDING AUTHOR), WALTHAM CTR PET NUTR, MELTON MOWBRAY LE14 4RT, LEICS, ENGLAND.; WALTHAM CTR PET NUTR, MELTON MOWBRAY LE14 4RT, LEICS, ENGLAND.	THERE IS AN INCREASING VOLUME OF WORK ON THE NUTRITIONAL REQUIREMENTS OF SMALL PSITTACINE AND PASSERINE SPECIES AND THIS, TOGETHER WITH THE EXTENSIVE NUTRITIONAL STUDIES OF POULTRY, PROVIDES A BASIS FOR NUTRITIONAL GUIDELINES FOR PET BIRDS. MOST OF THE SMALL PSITTACINE AND PASSERINE SPECIES ARE GRANIVOROUS, BUT NOT ALL THE NUTRITIONAL REQUIREMENTS CAN BE MET BY AN UNSUPPLEMENTED SEED DIET. MACRON…	INDEPENDENCE SQUARE WEST CURTIS CENTER, STE 300, PHILADELPHIA, PA 19106-3399 USA	NA	NA	NA	NA	NA	2020-10-26	100NZ	10.1016/S1055-937X(98)80002-9	NA	NA	NA	NA	NA	NA	NA	NA	1055-937X	SEMIN. AVIAN EXOT. PET MED.	SEMINARS IN AVIAN AND EXOTIC PET MEDICINE	ENGLISH	NA	JUL	NA	55	3	NA	NA	NA	116-127	W B SAUNDERS CO	VETERINARY SCIENCES	NA	NA	20	CLINICAL NUTRITION OF SMALL PSITTACINES AND PASSERINES	ARTICLE	3	16	7	VETERINARY SCIENCES
ISI000077491900013	rejected off topic illegal trade	Ada Sanchez	NADER W, 1999, BIOL CONSERV	NADER W;WERNER D;WINK M	DNA FINGERPRINTING; SCARLET MACAW; GENETIC DIVERSITY; SEXING;; REPATRIATION	DNA	NADER, W (CORRESPONDING AUTHOR), INST NACL BIODIVERSIDAD, SANTO DOMINGO DE HEREDIA, COSTA RICA.; INST NACL BIODIVERSIDAD, SANTO DOMINGO DE HEREDIA, COSTA RICA.; FDN PRO IGUANA VERDE, SAN JOSE, COSTA RICA.; UNIV HEIDELBERG, INST PHARMAZEUT BIOL, HEIDELBERG, GERMANY.	DURING THE LAST 40 YEARS, THE ONCE ABUNDANT AND WIDESPREAD ARA MACAO POPULATION IN COSTA RICA HAS BEEN REDUCED TO TWO MAJOR GROUPS AND ONE REMNANT GROUP, WHICH SURVIVE ISOLATED FROM ONE ANOTHER WITHIN THREE PROTECTED AREAS. TO MAINTAIN THE GENETIC DIVERSITY OF ONE OF THESE POPULATIONS LOCATED WITHIN THE CARARA BIOLOGICAL RESERVE, WHICH IS THREATENED BY FREQUENT POACHING, AN AVICULTURE PROGRAM WAS…	THE BOULEVARD, LANGFORD LANE, KIDLINGTON, OXFORD OX5 1GB, OXON, ENGLAND	NA	NA	NA	NA	NA	2020-10-26	148EN	10.1016/S0006-3207(98)00043-3	NA	NA	NA	NA	NA	NA	NA	NA	0006-3207	BIOL. CONSERV.	BIOLOGICAL CONSERVATION	ENGLISH	NA	FEB	NA	15	2	NA	WINK, MICHAEL/0000-0002-7875-4510	NA	269-272	ELSEVIER SCI LTD	BIODIVERSITY \& CONSERVATION; ENVIRONMENTAL SCIENCES \& ECOLOGY	WINK, MICHAEL/E-3803-2012	NA	13	GENETIC DIVERSITY OF SCARLET MACAWS ARA MACAO IN REINTRODUCTION STUDIES FOR THREATENED POPULATIONS IN COSTA RICA	ARTICLE	0	16	87	BIODIVERSITY CONSERVATION; ECOLOGY; ENVIRONMENTAL SCIENCES
ISI000078244500014	rejected off topic illegal trade	Ada Sanchez	BROWN DM, 1999, AUK	BROWN DM;TOFT CA	NA	ANCESTRAL AREAS; PARROTS; DNA; EXTRACTION; EVOLUTION; AVES	TOFT, CA (CORRESPONDING AUTHOR), UNIV CALIF DAVIS, DIV BIOL SCI, SECT EVOLUT \& ECOL, 621 CIRCLE DR S, LIVERMORE, CA 95616 USA.; UNIV CALIF DAVIS, DIV BIOL SCI, SECT EVOLUT \& ECOL, LIVERMORE, CA 95616 USA.	WE SEQUENCED A 433-BP REGION OF THE MITOCHONDRIAL 12S RIBOSOMAL SUBUNIT GENE FOR 15 OF THE 18 RECOGNIZED SPECIES OF COCKATOOS AND ALSO EXAMINED PREVIOUSLY PUBLISHED DATA ON ALLOZYMES. TESTS SHOWED THAT THE ALLOZYME AND MTDNA DATA HAVE SIMILAR PHYLOGENETIC SIGNALS. THE MTDNA PHYLOGENY PLACED THE PALM COCKATOO (PROBOSCIGER ATERRIMUS) AS THE FIRST EXTANT COCKATOO TO SPLIT, FOLLOWED BY A SUBCLADE CON…	ORNITHOLOGICAL SOC NORTH AMER PO BOX 1897, LAWRENCE, KS 66044-8897 USA	NA	NA	NA	NA	NA	2020-10-26	160RJ	10.2307/4089461	NA	NA	NA	NA	NA	NA	NA	NA	0004-8038	AUK	AUK	ENGLISH	NA	JAN	NA	34	1	NA	NA	NA	141-157	AMER ORNITHOLOGISTS UNION	ZOOLOGY	NA	NA	37	MOLECULAR SYSTEMATICS AND BIOGEOGRAPHY OF THE COCKATOOS (PSITTACIFORMES : CACATUIDAE)	ARTICLE	0	24	116	ORNITHOLOGY
ISI000078625300003	rejected off topic illegal trade	Ada Sanchez	SCHOEMAKER NJ, 1999, TIJDSCHR DIERGENEESKD	SCHOEMAKER NJ;LUMEIJ JT;DORRESTEIN GM;BEYNEN AC	NA	NA	SCHOEMAKER, NJ (CORRESPONDING AUTHOR), UNIV UTRECHT, FAC DIERGENEESKUNDE, KLIN GEZELSCHAPSDIEREN, AFDELING VOGELS BIJZONDERE DIEREN, POSTBUS 80154, NL-3508 TD UTRECHT, NETHERLANDS.; UNIV UTRECHT, FAC DIERGENEESKUNDE, KLIN GEZELSCHAPSDIEREN, AFDELING VOGELS BIJZONDERE DIEREN, NL-3508 TD UTRECHT, NETHERLANDS.; UNIV UTRECHT, FAC DIERGENEESKUNDE, VAKGRP PATHOL, AFDELING LAB DIEREN BIJZONDERE DIEREN, …	THE DETECTION AND CORRECTION OF DIETARY ERRORS PLAYS AN IMPORTANT ROLE IN AVIAN MEDICINE. EXAMPLES OF DISEASES CAUSED IN PART BY A DEFICIENCY OR ABUNDANCE OF A NUTRIENT INCLUDE HYPOVITAMINOSIS A IN BIRDS OF THE PARROT (PSITTACIDAE)FAMILY, HYPOCALCEMIA IN THE AFRICAN GREY PARROT, GOITRE IN BUDGERIGARS, AND IRON STORAGE DISEASES IN THE MINAH AND TOUCAN. HYPOVITAMINOSIS A CAN LEAD TO METAPLASIA OF M…	PO BOX 14031, 3508 UTRECHT, NETHERLANDS	NA	NA	NA	NA	NA	2020-10-26	167GZ	NA	NA	NA	NA	NA	NA	NA	NA	NA	0040-7453	TIJDSCHR. DIERGENEESKD.	TIJDSCHRIFT VOOR DIERGENEESKUNDE	DUTCH	NA	JAN 15	NA	21	2	NA	DORRESTEIN, GERRY/0000-0003-1667-1477	NA	39-43	ROYAL NETHERLANDS VETERINARY ASSOC	VETERINARY SCIENCES	DORRESTEIN, GERRY/AAX-5652-2020 BEYNEN, ANTHONIE/A-2047-2013	NA	12	DIET-RELATED PROBLEMS IN PET BIRDS	REVIEW	3	35	124	VETERINARY SCIENCES
ISI000081987800007	rejected off topic illegal trade	Ada Sanchez	BAGHIAN A, 1999, AVIAN DIS	BAGHIAN A;REYES CV;MENDOZA A;TULLY TN;KOUSOULAS KG	PSITTACINE; IMMUNOGLOBULIN; ANTIBODY; AVIAN; PARROT	NA	BAGHIAN, A (CORRESPONDING AUTHOR), LOUISIANA STATE UNIV, SCH VET MED, DEPT VET MICROBIOL \& PARASITOL, GENE PROBES \& EXPRESS SYST LAB GENE LAB, BATON ROUGE, LA 70803 USA.; LOUISIANA STATE UNIV, SCH VET MED, DEPT VET MICROBIOL \& PARASITOL, GENE PROBES \& EXPRESS SYST LAB GENE LAB, BATON ROUGE, LA 70803 USA.; UNIV TEXAS PAN AMER, EDINBURG, TX 78539 USA.; LOUISIANA STATE UNIV, SCH VET MED, DEPT VE…	THE PURPOSE OF THIS WORK WAS TO PRODUCE RABBIT ANTI-COCKATIEL IMMUNOGLOBULIN G (IGG) AND COMPARE ITS CROSS-REACTIVITY WITH SERA FROM EIGHT OTHER PSITTACINE BIRDS: QUAKER PARAKEET, BUDGERIGAR, GREEN-WING MACAW, BLUE-FRONTED AMAZON PARROT, ECLECTUS PARROT, AFRICAN GREY PARROT, PATAGONIAN CONURE, MOLUCCAN COCKATOO. COCKATIEL IGG DID NOT BIND TO PROTEIN A OR G; THEREFORE, THESE PROTEINS COULD NOT BE …	UNIV PENN, NEW BOLTON CENTER, KENNETT SQ, PA 19348-1692 USA	NA	NA	NA	NA	NA	2020-10-26	225VZ	10.2307/1592761	NA	NA	NA	NA	NA	NA	NA	NA	0005-2086	AVIAN DIS.	AVIAN DISEASES	ENGLISH	NA	JAN-MAR	NA	8	1	NA	NA	NA	48-54	AMER ASSOC AVIAN PATHOLOGISTS	VETERINARY SCIENCES	NA	NA	8	PRODUCTION OF A RABBIT ANTI-COCKATIEL IMMUNOGLOBULIN G AND CHARACTERIZATION OF ITS CROSS-REACTIVITIES WITH IMMUNOGLOBULIN G OF OTHER PSITTACINE SPECIES	ARTICLE	0	1	43	VETERINARY SCIENCES
ISI000083027000012	included in review	Ada Sanchez	ROBINET O, 1999, IBIS	ROBINET O;SALAS M	NA	WESTERN-AUSTRALIA; CLUTCH SIZE; PSITTACIFORMES; PARROTS; PRODUCTIVITY;; MORTALITY; ISLAND	ROBINET, O (CORRESPONDING AUTHOR), MINIST AMENAGEMENT TERR \& ENVIRONM, DNP, BYR FAUNE \& FLORE SAUVAGES, 20 AV DE SEGUR, F-75302 PARIS 07, FRANCE.; UNIV AUCKLAND, SCH BIOL SCI, AUCKLAND 1, NEW ZEALAND.; CIRAD, NOUMEA, NEW CALEDONIA.	THE REPRODUCTIVE BIOLOGY OF THE ENDANGERED OUVEA PARAKEET EUNYMPHICUS CORNUTUS UVAEENSIS, AN ENDEMIC SUBSPECIES OF OUVEA ISLAND (TERRITORY OF NEW CALEDONIA, SOUTHWEST PACIFIC) WAS STUDIED FROM JUNE 1994 TO FEBRUARY 1996. BREEDING WAS RECORDED FROM EARLY AUGUST UNTIL LATE JANUARY. ALL NESTS WERE SITED IN CAVITIES OF NATIVE FOREST TREES, 90\%, OF THEM IN SYZYGIUM SP. AND MIMUSOPS SP. MEAN CLUTCH SI…	111 RIVER ST, HOBOKEN 07030-5774, NJ USA	NA	OLIVIER.ROBINET@ENVIRONNEMENT.GOUV.FR	NA	NA	NA	2020-10-26	243ZH	10.1111/j.1474-919X.1999.tb07374.x	NA	NA	1474-919X	NA	NA	NA	NA	NA	0019-1019	IBIS	IBIS	ENGLISH	NA	OCT	NA	42	4	NA	NA	NA	660-669	WILEY	ZOOLOGY	NA	NA	18	REPRODUCTIVE BIOLOGY OF THE ENDANGERED OUVEA PARAKEET EUNYMPHICUS CORNUTUS UVAEENSIS	ARTICLE	0	12	141	ORNITHOLOGY
ISI000083838000006	rejected off topic illegal trade	Ada Sanchez	PUSCHNER B, 1999, J VET DIAGN INVEST	PUSCHNER B;ST LEGER J;GALEY FD	NA	AVIARY BIRDS; WIRE DISEASE; INGESTION; PENNIES; HEALTH	PUSCHNER, B (CORRESPONDING AUTHOR), UNIV CALIF DAVIS, CALIF VET DIAGNOST LAB SYST, TOXICOL LAB, DAVIS, CA 95616 USA.; UNIV CALIF DAVIS, CALIF VET DIAGNOST LAB SYST, TOXICOL LAB, DAVIS, CA 95616 USA.; CALIF VET DIAGNOST LAB SYST, SAN BERNARDINO, CA 92408 USA.	DETERMINATION OF ZINC CONCENTRATION IN SERUM/PLASMA AND TISSUE OF CAGED AND AVIARY BIRDS IS COMMONLY REQUESTED BY PRACTITIONERS BECAUSE OF AN INCREASED AWARENESS OF ZINC TOXICITY. HOWEVER, INTERPRETATION OF ZINC LEVELS IS OFTEN BASED ON NORMAL ZINC CONCENTRATIONS ESTABLISHED FUR POULTRY. ALSO, IT IS LIKELY THAT INTERGENUS DIFFERENCES EXIST IN NORMAL ZINC CONCENTRATIONS OF PET BIRDS. IN AN ATTEMPT…	PO BOX 1522, TURLOCK, CA 95381 USA	NA	NA	NA	NA	NA	2020-10-26	258KH	10.1177/104063879901100606	NA	NA	NA	NA	NA	NA	NA	NA	1040-6387	J. VET. DIAGN. INVEST.	JOURNAL OF VETERINARY DIAGNOSTIC INVESTIGATION	ENGLISH	NA	NOV	NA	39	6	BRONZE	ST. LEGER, JUDY/0000-0002-6213-3429 PUSCHNER, BIRGIT/0000-0001-6765-5085	NA	522-527	AMER ASSOC VETERINARY LABORATORY DIAGNOSTICIANS INC	VETERINARY SCIENCES	ST. LEGER, JUDY/AAD-3565-2019	NA	21	NORMAL AND TOXIC ZINC CONCENTRATIONS IN SERUM/PLASMA AND LIVER OF PSITTACINES WITH RESPECT TO GENUS DIFFERENCES	ARTICLE	1	12	11	VETERINARY SCIENCES
ISI000084716800005	rejected off topic illegal trade	Ada Sanchez	MESSMER T, 2000, SEMIN AVIAN EXOT PET MED	MESSMER T;TULLY TN;RITCHIE BW;MORONEY JF	CHLAMYDIA; CHLAMYDOPHILA PSITTACI; PCR; PSITTACOSIS; CHLAMYDIOSIS	PSITTACOSIS; CHLAMYDIOSIS; PNEUMONIAE; DIAGNOSIS; INFECTION; OUTBREAK	MESSMER, T (CORRESPONDING AUTHOR), CDC, 1600 CLIFTON RD,MS G 05, ATLANTA, GA 30333 USA.; CDC, ATLANTA, GA 30333 USA.; LOUISIANA STATE UNIV, VET TEACHING HOSP \& CLIN, SCH VET MED, BATON ROUGE, LA 70803 USA.; UNIV GEORGIA, COLL VET MED, ATHENS, GA USA.	WE DEVELOPED A NESTED, MULTIPLEX POLYMERASE CHAIN REACTION (PCR) FOR SIMULTANEOUS DETECTION AND DISCRIMINATION OF THREE SPECIES OF CHLAMYDIA IN HUMAN AND AVIAN SPECIMENS TO DETERMINE TRANSMISSION OF CHLAMYDOPHILA PSITTACI FROM INFECTED BIRDS TO HUMANS. THE NESTED PCR STRATEGY WAS USED TO INCREASE SENSITIVITY AND TO CIRCUMVENT INHIBITORS OF PCR PRESENT IN CLINICAL SPECIMENS. THE TARGET SEQUENCE OF…	1600 JOHN F KENNEDY BOULEVARD, STE 1800, PHILADELPHIA, PA 19103-2899 USA	NA	NA	NA	NA	NA	2020-10-26	273PV	10.1016/S1055-937X(00)80014-6	NA	NA	NA	NA	NA	NA	NA	NA	1055-937X	SEMIN. AVIAN EXOT. PET MED.	SEMINARS IN AVIAN AND EXOTIC PET MEDICINE	ENGLISH	NA	JAN	NA	43	1	NA	NA	NA	36-42	W B SAUNDERS CO-ELSEVIER INC	VETERINARY SCIENCES	NA	NA	7	A TALE OF DISCRIMINATION: DIFFERENTIATION OF CHLAMYDIACEAE BY POLYMERASE CHAIN REACTION	ARTICLE	0	1	9	VETERINARY SCIENCES
ISI000084903000005	rejected off topic illegal trade	Ada Sanchez	NOSANCHUK JD, 2000, ANN INTERN MED	NOSANCHUK JD;SHOHAM S;FRIES BC;SHAPIRO DS;LEVITZ SM;CASADEVALL A	NA	SEROTYPE-D; PIGEON EXCRETA; CR-NEOFORMANS; FECAL MATTER; BIRDS KEPT;; DROPPINGS	CASADEVALL, A (CORRESPONDING AUTHOR), ALBERT EINSTEIN COLL MED, 1300 MORRIS PK AVE, BRONX, NY 10461 USA.; ALBERT EINSTEIN COLL MED, BRONX, NY 10461 USA.; BOSTON UNIV, SCH MED, BOSTON, MA 02118 USA.	BACKGROUND: ALTHOUGH CRYPTOCOCCOSIS HAS BEEN ASSOCIATED WITH BIRDS FOR ALMOST 50 YEARS, POINT SOURCES FOR INFECTION HAVE NOT BEEN IDENTIFIED. OBJECTIVE: TO DOCUMENT ZOONOTIC TRANSMISSION OF CRYPTOCOCCUS NEOFORMANS. DESIGN: CASE REPORT. SETTING: A:HOME IN BOSTON, MASSACHUSETTS. PATIENT: A:72-YEAR-OLD WOMAN WHO RECEIVED A DIAGNOSIS OF CRYPTOCOCCAL MENINGITIS IN NOVEMBER 1998, THE PATIENT, WHO HAD B…	INDEPENDENCE MALL WEST 6TH AND RACE ST, PHILADELPHIA, PA 19106-1572 USA	NA	CASADEVA@AECOM.YU.EDU	NA	NA	NA	2020-10-26	276XE	10.7326/0003-4819-132-3-200002010-00006	NA	NA	1539-3704	NA	NA	NA	NA	NA	0003-4819	ANN. INTERN. MED.	ANNALS OF INTERNAL MEDICINE	ENGLISH	NA	FEB 1	NA	20	3	NA	NA	NA	205-208	AMER COLL PHYSICIANS	GENERAL \& INTERNAL MEDICINE	NA	NA	90	EVIDENCE OF ZOONOTIC TRANSMISSION CRYPTOCOCCUS NEOFORMANS FROM A PET COCKATOO TO AN IMMUNOCOMPROMISED PATIENT	ARTICLE	0	7	132	MEDICINE, GENERAL \& INTERNAL
ISI000084916500001	rejected off topic illegal trade	Ada Sanchez	BEREGI A, 1999, ACTA VET HUNG	BEREGI A;MOLNAR V;FELKAI F;BIRO F;SZENTGALI Z	PET BIRDS; WILD BIRDS; RADIOLOGY; DIAGNOSIS; INDICATIONS; PATHOLOGICAL; LESIONS	RESPIRATORY-TRACT; SKULL	BEREGI, A (CORRESPONDING AUTHOR), UNIV VET SCI, DEPT CLIN INTERNAL MED, OUTPATIENT CLIN, POB 2, H-1400 BUDAPEST, HUNGARY.; UNIV VET SCI, DEPT CLIN INTERNAL MED, OUTPATIENT CLIN, H-1400 BUDAPEST, HUNGARY.; UNIV VET SCI, DEPT CLIN SURG \& OPHTHALMOL, H-1400 BUDAPEST, HUNGARY.	THE SECOND PART OF THE REVIEW DEALING WITH THE DIAGNOSTIC RADIOLOGY OF PET AND WILD BIRDS DISCUSSES THE INDICATIONS OF RADIOLOGICAL EXAMINATION, THE INTERPRETATION OF RADIOGRAPHS TAKEN OF PATHOLOGICAL LESIONS, AND THE DIFFERENTIAL DIAGNOSIS OF SUCH LESIONS. RADIOLOGY HAS PARAMOUNT IMPORTANCE IN THE DIAGNOSIS OF DISEASES AFFECTING THE SKELETAL, DIGESTIVE, RESPIRATORY, UROGENITAL AND CARDIOVASCULAR…	PO BOX 245, H-1519 BUDAPEST, HUNGARY	NA	NA	NA	NA	NA	2020-10-26	277DB	10.1556/AVet.47.1999.4.1	NA	NA	NA	NA	NA	NA	NA	NA	0236-6290	ACTA VET. HUNG.	ACTA VETERINARIA HUNGARICA	ENGLISH	NA	NA	NA	41	4	GREEN ACCEPTED	NA	NA	395-408	AKADEMIAI KIADO	VETERINARY SCIENCES	NA	NA	5	DIAGNOSTIC RADIOLOGY OF PET AND WILD BIRDS: A REVIEW II. INDICATIONS OF RADIOLOGICAL, EXAMINATION AND RADIOGRAPHS OF PATHOLOGICAL LESIONS	ARTICLE	0	7	47	VETERINARY SCIENCES
ISI000088246100077	rejected illegal trade circunstancial	Ada Sanchez	SELMAN RG, 2000, OSTRICH	SELMAN RG;HUNTER ML;PERRIN MR	NA	NA	SELMAN, RG (CORRESPONDING AUTHOR), UNIV NATAL, P BAG X01, ZA-3209 SCOTTSVILLE, SOUTH AFRICA.; UNIV NATAL, ZA-3209 SCOTTSVILLE, SOUTH AFRICA.	WE HAVE STARTED THE FIRST IN-DEPTH STUDY INTO THE BEHAVIOUR OF RUPPELL'S PARROT IN THE WILD. HERE WE PROVIDE THE INITIAL RESULTS WITH INFORMATION ON ITS BREEDING BIOLOGY, DIET AND USE OF NATURAL AND ARTIFICIAL WATER POOLS IN NORTHERN NAMIBIA. A VARIETY OF PREDATORS ARE LISTED, THE TERRESTRIAL AND ARBOREAL ONES CAUSING COMPLETE LOSSES AT SOME NESTS. ILLEGAL TRADE IS THE MAJOR THREAT TO THIS SPECIE…	PO BOX 84394, GREENSIDE 2034, SOUTH AFRICA	NA	NA	NA	NA	NA	2020-10-26	335LZ	10.1080/00306525.2000.9639955	NA	NA	NA	NA	NA	NA	NA	NA	0030-6525	OSTRICH	OSTRICH	ENGLISH	NA	MAR	9TH PAN-AFRICAN ORNITHOLOGICAL CONGRESS, ACCRA, GHANA, DEC 01-07, 1996	7	12	NA	NA	BIRDLIFE INT; ROYAL SOC PROTECT BIRDS; STANDARD CHARTERED BANK, ACCRA; GHANA WILDLIFE SOC; MINIST LANDS \& FOREST; GHANA NATL PETR CORP; FRANK CHAMPMAN MEM FUND; GHANA CHAMBER MINES; ECOBANK, ACCRA; BRITISH COUNCIL, ACCRA; EUROPEAN UNION	347-348	BIRDLIFE SOUTH AFRICA	ZOOLOGY	NA	NA	3	RUPPELL'S PARROT: STATUS, ECOLOGY AND CONSERVATION BIOLOGY	ARTICLE; PROCEEDINGS PAPER	0	4	71	ORNITHOLOGY
ISI000088365700001	rejected off topic illegal trade	Ada Sanchez	TAORMINA PJ, 2000, COMPEND CONTIN EDUC PRACT VET	TAORMINA PJ	NA	ESCHERICHIA-COLI O157-H7; HOUSED IGUANID LIZARDS;; LISTERIA-MONOCYTOGENES; FRESH VEGETABLES; PSITTACINE BIRDS;; SALMONELLA-MONTEVIDEO; CONTROLLED-ATMOSPHERE; CAMPYLOBACTER-JEJUNI;; CHLORINATED WATER; SALAD VEGETABLES	TAORMINA, PJ (CORRESPONDING AUTHOR), UNIV GEORGIA, CTR FOOD SAFETY \& QUAL ENHANCEMENT, GRIFFIN, GA 30223 USA.; UNIV GEORGIA, CTR FOOD SAFETY \& QUAL ENHANCEMENT, GRIFFIN, GA 30223 USA.	EXOTIC PETS ARE SUSCEPTIBLE TO SYMPTOMATIC OR ASYMPTOMATIC CARRIAGE OF BACTERIA PATHOGENIC TO HUMANS. FATALITIES IN EXOTIC PETS AND TRANSMISSION OF ILLNESSES TO HUMANS PERSIST AS SERIOUS CONSEQUENCES TO THESE INFECTIONS. MANY TYPES OF VEGETABLES CAN HARBOR BACTERIAL PATHOGENS AND ARE POTENTIALLY A SOURCE OF INFECTION IN EXOTIC PETS. FRUITS AND VEGETABLES SUPPORT GOOD GROWTH OF PATHOGENIC BACTERIA…	780 TOWNSHIP LINE RD, YARDLEY, PA 19067-4200 USA	NA	NA	NA	NA	NA	2020-10-26	337MQ	NA	NA	NA	NA	NA	NA	NA	NA	NA	0193-1903	COMPEND. CONTIN. EDUC. PRACT. VET.	COMPENDIUM ON CONTINUING EDUCATION FOR THE PRACTICING VETERINARIAN	ENGLISH	NA	JUL	NA	90	7	NA	NA	NA	636	VETERINARY LEARNING SYSTEMS	VETERINARY SCIENCES	NA	NA	1	PRODUCE AS A POTENTIAL SOURCE OF BACTERIAL INFECTIONS IN EXOTIC PETS	ARTICLE	1	3	22	VETERINARY SCIENCES
ISI000088945600009	rejected off topic illegal trade	Ada Sanchez	MARSDEN SJ, 2000, BIOL CONSERV	MARSDEN SJ;WHIFFIN M;SADGROVE L;GUIMARAES P	PARROTS; ATLANTIC FOREST; POPULATION SIZES; AMAZONA; PYRRHURA	SERAM	MARSDEN, SJ (CORRESPONDING AUTHOR), MANCHESTER METROPOLITAN UNIV, DEPT ENVIRONM \& GEOG SCI, APPL ECOL GRP, CHESTER ST, MANCHESTER M1 5GD, LANCS, ENGLAND.; MANCHESTER METROPOLITAN UNIV, DEPT BIOL SCI, BEHAV \& ENVIRONM BIOL GRP, MANCHESTER M1 5GD, LANCS, ENGLAND.; UNIV ESTADUAL PAULISTA, DEPT ECOL, PLANT PHENOL \& SEED DISPERAL RES GRP, BR-13506900 RIO CLARO, SP, BRAZIL.	WE ESTIMATED POPULATION SIZES OF PARROTS IN A LARGE (SOORETAMA/LINHARES) AND A SMALL (PORTO SEGURO) LOWLAND ATLANTIC FOREST RESERVE, AND EXAMINED THEIR HABITAT ASSOCIATIONS WITHIN THE RESERVES, AND THEIR USE OF FOREST FRAGMENTS. IN SOORETAMA, MOST SPECIES HAD ESTIMATED POPULATIONS BETWEEN 1000 AND 20,000 INDIVIDUALS, BUT IN THE SMALLER RESERVE POPULATION DENSITIES WERE LOW AND ALL BUT ONE SPECIES…	THE BOULEVARD, LANGFORD LANE, KIDLINGTON, OXFORD OX5 1GB, OXON, ENGLAND	NA	S.MARSDEN@MMU.AC.UK	NA	NA	NA	2020-10-26	347TQ	10.1016/S0006-3207(00)00071-9	NA	NA	1873-2917	NA	NA	NA	NA	NA	0006-3207	BIOL. CONSERV.	BIOLOGICAL CONSERVATION	ENGLISH	NA	DEC	NA	32	2	GREEN PUBLISHED	NA	NA	209-217	ELSEVIER SCI LTD	BIODIVERSITY \& CONSERVATION; ENVIRONMENTAL SCIENCES \& ECOLOGY	GUIMARAES, PAULO/B-1099-2008 GUIMARAES, PAULO R./E-1915-2016 GUIMARAES-JUNIOR, PAULO R/M-1298-2016	NA	25	PARROT POPULATIONS AND HABITAT USE IN AND AROUND TWO LOWLAND ATLANTIC FOREST RESERVES, BRAZIL	ARTICLE	0	14	96	BIODIVERSITY CONSERVATION; ECOLOGY; ENVIRONMENTAL SCIENCES
ISI000089818500005	included in review	Ada Sanchez	HESSE AJ, 2000, BIRD CONSERV INT	HESSE AJ;DUFFIELD GE	NA	NA	HESSE, AJ (CORRESPONDING AUTHOR), ASOCIAC ARMONIA, CASILLA 3081,CALLE MEXICO 110, SANTA CRUZ, BOLIVIA.; ASOCIAC ARMONIA, SANTA CRUZ, BOLIVIA.; DARTMOUTH COLL, SCH MED, DEPT GENET, HANOVER, NH 03755 USA.	THE CONSERVATION STATUS OF THE BLUE-THROATED MACAW ARA GLAUCOGULARIS, A BOLIVIAN ENDEMIC, IS ASSESSED USING THE MOST RECENT INFORMATION AVAILABLE. THE KNOWN RANGE OF THE SPECIES IS PATCHILY DISTRIBUTED WITHIN AN 8,600 KM(2) AREA OF LOWLAND SAVANNA-FOREST HABITAT IN THE BENI DEPARTMENT, UNDER PRIVATE OWNERSHIP FOR CATTLE RANCHING, WHICH IS THE MAIN FORM OF LAND USE IN THE REGION. POPULATION SURVEY…	40 WEST 20TH STREET, NEW YORK, NY 10011-4211 USA	NA	NA	NA	NA	NA	2020-10-26	363DA	10.1017/S0959270900000216	NA	NA	NA	NA	NA	NA	NA	NA	0959-2709	BIRD CONSERV. INT.	BIRD CONSERVATION INTERNATIONAL	ENGLISH	NA	SEP	NA	55	3	BRONZE	NA	NA	255-275	CAMBRIDGE UNIV PRESS	BIODIVERSITY \& CONSERVATION; ZOOLOGY	NA	NA	13	THE STATUS AND CONSERVATION OF THE BLUE-THROATED MACAW ARA GLAUCOGULARIS	ARTICLE	1	26	10	BIODIVERSITY CONSERVATION; ORNITHOLOGY
ISI000166335300004	rejected off topic illegal trade	Ada Sanchez	TULLY TN, 2001, SEMIN AVIAN EXOT PET MED	TULLY TN	AVIAN; PSITTICINE; CHLAMYDIA PSITTACI; CHLAMYDOPHILA PSITTACI; ZOONOSIS	CHLAMYDIA-PSITTACI; RIBOSOMAL-RNA; SERA; ANTIBODY; GENE	TULLY, TN (CORRESPONDING AUTHOR), LOUISIANA STATE UNIV, SCH VET MED, DEPT VET CLIN SCI, S STADIUM RD, BATON ROUGE, LA 70803 USA.; LOUISIANA STATE UNIV, SCH VET MED, DEPT VET CLIN SCI, BATON ROUGE, LA 70803 USA.	CHLAMYDIA PSITTACI, THE NAME VETERINARIANS COMMONLY CALL THE PARROT FEVER ORGANISM, HAS BEEN ONE OF THE MOST COMMON BACTERIAL DISEASES THAT INFECTS PET BIRDS. THIS INTRACELLULAR BACTERIUM HAS BEEN THE SUBJECT OF MUCH RESEARCH REGARDING AVIAN SPECIES AS WELL AS HUMANS AND OTHER ANIMAL GROUPS. THE GENESIS OF THIS RESEARCH IS NOT ONLY TO IMPROVE DIAGNOSTIC CAPABILITIES AND ANIMAL HEALTH, BUT ALSO BE…	INDEPENDENCE SQUARE WEST CURTIS CENTER, STE 300, PHILADELPHIA, PA 19106-3399 USA	NA	NA	NA	NA	NA	2020-10-26	391BY	10.1053/saep.2001.19795	NA	NA	NA	NA	NA	NA	NA	NA	1055-937X	SEMIN. AVIAN EXOT. PET MED.	SEMINARS IN AVIAN AND EXOTIC PET MEDICINE	ENGLISH	NA	JAN	NA	19	1	NA	NA	NA	20-24	W B SAUNDERS CO	VETERINARY SCIENCES	NA	NA	3	UPDATE ON CHLAMYDOPHILA PSITTACI	ARTICLE	0	3	10	VETERINARY SCIENCES
ISI000167773800012	rejected off topic illegal trade	Ada Sanchez	AGRAWAL A, 2001, NEW SCI	AGRAWAL A	NA	NA	NA	NA	200 MEACHAM AVE, ELMONT, NY 11003 USA	NA	NA	NA	NA	NA	2020-10-26	416HG	NA	NA	NA	NA	NA	NA	NA	NA	NA	0262-4079	NEW SCI.	NEW SCIENTIST	ENGLISH	NA	MAR 24	NA	1	2283	NA	NA	NA	16	NEW SCIENTIST PUBL EXPEDITING INC	SCIENCE \& TECHNOLOGY - OTHER TOPICS	NA	NA	0	AS SICK AS A PARROT - A VIRUS FOUND IN PET BIRDS COULD TRIGGER ANOTHER LETHAL FLU PANDEMIC	NEWS ITEM	0	0	169	MULTIDISCIPLINARY SCIENCES
ISI000168301600004	rejected off topic illegal trade	JRFP	RUSSELLO MA, 2001, ZOO BIOL	RUSSELLO MA;AMATO G	SEX TYPING; CAPTIVE BREEDING; ST. VINCENT PARROT	DNA	RUSSELLO, MA (CORRESPONDING AUTHOR), AMER MUSEUM NAT HIST, MOL SYSTEMAT LAB, CENT PK W \& 79TH ST, NEW YORK, NY 10024 USA.; AMER MUSEUM NAT HIST, MOL SYSTEMAT LAB, NEW YORK, NY 10024 USA.; COLUMBIA UNIV, CTR ENVIRONM RES \& CONSERVAT, NEW YORK, NY USA.; WILDLIFE CONSERVAT SOC, SCI RESOURCE CTR, BRONX, NY USA.	THE ST. VINCENT AMAZON PARROT CONSORTIUM WAS ESTABLISHED DURING THE 1980S IN AN EFFORT TO COOPERATIVELY MANAGE THE CAPTIVE POPULATION OF THE ST. VINCENT PARROT (AMAZONA GUILDINGII) AND SUPPORT CONSERVATION OF THE WILD POPULATION. EX SITU MANAGEMENT OF A. GUILDINGII HAS BEEN HINDERED BY THE SEXUAL MONOMORPHISM OF THE GROUP. MEDIATED IN THE PAST THROUGH THE USE OF TIME-CONSUMING, EXPERT-DRIVEN, AND…	DIV JOHN WILEY \& SONS INC, 605 THIRD AVE, NEW YORK, NY 10158-0012 USA	NA	NA	NA	NA	NA	2020-10-26	425QB	10.1002/zoo.1004	NA	NA	NA	NA	NA	NA	NA	NA	0733-3188	ZOO BIOL.	ZOO BIOLOGY	ENGLISH	NA	NA	NA	8	1	NA	NA	NA	41-45	WILEY-LISS	VETERINARY SCIENCES; ZOOLOGY	NA	NA	17	APPLICATION OF A NONINVASIVE, PCR-BASED TEST FOR SEX IDENTIFICATION IN AN ENDANGERED PARROT, AMAZONA GUILDINGII	ARTICLE	0	11	20	VETERINARY SCIENCES; ZOOLOGY
ISI000169226000018	included in review	Ada Sanchez	WRIGHT TF, 2001, CONSERV BIOL	WRIGHT TF;TOFT CA;ENKERLIN-HOEFLICH E;GONZALEZ-ELIZONDO J;ALBORNOZ M;RODRIGUEZ-FERRARO A;ROJAS-SUAREZ F;SANZ V;TRUJILLO A;BEISSINGER SR;BEROVIDES V;GALVEZ AT;JOYNER K;EBERHARD J;GILARDI J;KOENIG SE;STOLESON S;MARTUSCELLI P;MEYERS JM;RENTON AM;SOSA-ASANZA AC;VILELLA FJ;WILEY JW	NA	CONSERVATION; ISLAND; POPULATIONS; TRADE	WRIGHT, TF (CORRESPONDING AUTHOR), UNIV MARYLAND, DEPT BIOL, COLLEGE PK, MD 20742 USA.; UNIV MARYLAND, DEPT BIOL, COLLEGE PK, MD 20742 USA.; UNIV CALIF DAVIS, CTR POPULAT BIOL, DAVIS, CA 95616 USA.; CTR CALIDAD AMBIENTAL, MONTERREY 64849, NL, MEXICO.; PROVITA, CARACAS 1041A, VENEZUELA.; UNIV CALIF BERKELEY, ECOSYST SCI DIV, BERKELEY, CA 94720 USA.; UNIV LA HABANA, FAC BIOL, HAVANA, CUBA.; UNIV CA…	ALTHOUGH THE POACHING OF NESTLINGS FOR THE PET TRADE IS THOUGHT TO CONTRIBUTE TO THE DECLINE OF MANY SPECIES OF PARROTS, ITS EFFECTS HAVE BEEN POOL LY DEMONSTRATED WE CALCULATED RATS OF MORTALITY DUE TO NEST POACHING IN 23 STUDIES OF NEOTROPICAL PARROTS, REPRESENTING 4024 NESTING ATTEMPTS IN 21 SPECIES AND 14 COUNTRIES WE ALSO EXAMINED HOW POACHING RATES VARY WITH WITH GEOGRAPHIC REGION, PRESENCE…	111 RIVER ST, HOBOKEN 07030-5774, NJ USA	NA	TW98@UMAIL.UMD.EDU	NA	NA	NA	2020-10-26	441HY	10.1046/j.1523-1739.2001.015003710.x	NA	NA	1523-1739	NA	NA	NA	NA	NA	0888-8892	CONSERV. BIOL.	CONSERVATION BIOLOGY	ENGLISH	NA	JUN	NA	66	3	NA	NA	NA	710-720	WILEY	BIODIVERSITY \& CONSERVATION; ENVIRONMENTAL SCIENCES \& ECOLOGY	BEISSINGER, STEVEN R/F-3809-2012	NA	127	NEST POACHING IN NEOTROPICAL PARROTS	ARTICLE	1	50	15	BIODIVERSITY CONSERVATION; ECOLOGY; ENVIRONMENTAL SCIENCES
ISI000169628700001	rejected off topic illegal trade	Ada Sanchez	RZEDZICKI J, 2001, MED WETER	RZEDZICKI J;TOKARZEWSKI S	CHLAMYDIA PSITTACI; CHLAMYDIOSIS; BIRDS; ZOONOSES	AVIAN CHLAMYDIOSIS; PET BIRDS; DIAGNOSIS; ANTIBODIES	RZEDZICKI, J (CORRESPONDING AUTHOR), MED WETERYNARYJNEJ AR, KATEDRA PROFILAKTYKI OGOLNEJ \& CHOROB PTAKOW WYDZ, UL AKAD 12, PL-20033 LUBLIN, POLAND.; MED WETERYNARYJNEJ AR, KATEDRA PROFILAKTYKI OGOLNEJ \& CHOROB PTAKOW WYDZ, PL-20033 LUBLIN, POLAND.	CHLAMYDIOSIS, ALSO KNOW AS PARROT DISEASE, PARROT FEVER, ORNITHOSIS OR PSITTACOSIS IS A WIDESPREAD DISEASE CAUSED BY AN ORGANISM CALLED CHLAMYDIA PSITTACI. C. PSITTACI HAS BEEN ISOLATED FROM MORE THAN A ONE HUNDRED AND THIRTY AVIAN SPECIES AND IS MOST COMMONLY IDENTIFIED IN PSITTACINE BIRDS. INFECTION CAN BE TRANSMITTED FROM INFECTED BIRDS TO HUMANS. HUMANS ARE USUALLY INFECTED BY INHALING INFECT…	AKADEMICKA 12, 20-950 LUBLIN, POLAND	NA	NA	NA	NA	NA	2020-10-26	448LQ	NA	NA	NA	NA	NA	NA	NA	NA	NA	0025-8628	MED. WETER.	MEDYCYNA WETERYNARYJNA-VETERINARY MEDICINE-SCIENCE AND PRACTICE	POLISH	NA	JUL	NA	30	7	NA	NA	NA	459-463	POLISH SOC VETERINARY SCIENCES EDITORIAL OFFICE	VETERINARY SCIENCES	NA	NA	1	BIRDS AS A POTENTIAL SOURCE OF HUMAN INFECTION BY CHLAMYDIAE	REVIEW	2	17	57	VETERINARY SCIENCES
ISI000170262400012	rejected off topic illegal trade	Ada Sanchez	KVIST LP, 2001, FOR ECOL MANAGE	KVIST LP;GRAM S;CACARES A;ORE I	PACAYA-SAMIRIA NATIONAL RESERVE; COCAMAS; RIBERENOS; AGRICULTURE;; EXTRACTION; FISHING; HUNTING; PALM FRUITS; PALM HEARTS; YOUNG PARROTS;; TURTLE EGGS; DEBT-PEONAGE	TROPICAL-FOREST PRODUCTS; RAIN-FOREST; SRI-LANKA; CONSERVATION;; VALUATION; AREA	KVIST, LP (CORRESPONDING AUTHOR), ROYAL VET \& AGR UNIV, DEPT ECON \& NAT RESOURCES, ROLIGHEDSVEJ 23, FREDERIKSBERG 1958 C, DENMARK.; ROYAL VET \& AGR UNIV, DEPT ECON \& NAT RESOURCES, FREDERIKSBERG 1958 C, DENMARK.; AIF, WWF, DK, PROGRAMA INTEGRAL DESARROLLO \& CONSERVAC PACAYA S, IQUITOS, PERU.	THE PACAYA-SAMIRIA NATIONAL RESERVE IS LOCATED BETWEEN THE UCAYALI AND MARANON RIVERS IN THE LOWLAND PERUVIAN AMAZON, AND AROUND 170 COMMUNITIES IN THE AREA DEPEND ON RESOURCES EXTRACTED FROM THE EXTENSIVE FLOOD PLAINS IN AND JUST OUTSIDE THE RESERVE. THE PRESENT STUDY UNDERTOOK A 1 YEAR COLLABORATION WITH 38 HOUSEHOLDS OF SEVEN COMMUNITIES DISTRIBUTED IN THREE GEOGRAPHICALLY DISTANT AREAS. ALL T…	PO BOX 211, 1000 AE AMSTERDAM, NETHERLANDS	NA	NA	NA	NA	NA	2020-10-26	459QN	10.1016/S0378-1127(00)00689-7	NA	NA	NA	NA	NA	NA	NA	NA	0378-1127	FOR. ECOL. MANAGE.	FOREST ECOLOGY AND MANAGEMENT	ENGLISH	NA	SEP 1	NA	34	12	NA	NA	NA	175-186	ELSEVIER SCIENCE BV	FORESTRY	NA	NA	28	SOCIO-ECONOMY OF FLOOD PLAIN HOUSEHOLDS IN THE PERUVIAN AMAZON	ARTICLE	0	17	150	FORESTRY
ISI000171725900002	rejected off topic illegal trade	Ada Sanchez	MCMUNN MT, 1999, ANTHROZOOS	MCMUNN MT	NA	NA	MCMUNN, MT (CORRESPONDING AUTHOR), RHODE ISL COLL, PROVIDENCE, RI 02908 USA.; RHODE ISL COLL, PROVIDENCE, RI 02908 USA.	PARROTS HAVE BEEN KEPT AS PETS IN THE WEST SINCE CLASSICAL ANTIQUITY, AND THEY APPEAR FREQUENTLY IN ART. HOWEVER, THEY ARE RARELY REPRESENTED IN EUROPEAN LITERATURE UNTIL THE END OF THE MIDDLE AGES. ``LE CHEVALIER DU PAPEGAU'' (LATE FOURTEENTH CENTURY, ANONYMOUS), ``LES EPITRES DE L'AMONT VERT'' (1505) BY JEAN LEMAIRE DE BELGES, AND ``THE TESTAMENT AND COMPLAYNT OF OUR SOVERANE LORDIS PAPYNGO'' (…	1207 SOUTH CAMPUS COURTS-E, W LAFAYETTE, IN 47907-1207 USA	NA	NA	NA	NA	NA	2020-10-26	V3116	10.2752/089279399787000345	NA	NA	NA	NA	NA	NA	NA	NA	0892-7936	ANTHROZOOS	ANTHROZOOS	ENGLISH	NA	NA	NA	44	2	NA	NA	NA	68-75	PURDUE UNIV PRESS	ANTHROPOLOGY; ENVIRONMENTAL SCIENCES \& ECOLOGY; SOCIOLOGY; VETERINARY SCIENCES	NA	NA	0	PARROTS AND POETS IN LATE MEDIEVAL LITERATURE	REVIEW	0	3	12	ANTHROPOLOGY; ENVIRONMENTAL STUDIES; SOCIOLOGY; VETERINARY SCIENCES
ISI000172418700003	rejected off topic illegal trade	Ada Sanchez	MCDONNELL PA, 2001, EUR J PROTISTOL	MCDONNELL PA;UPCROFT J;UPCROFT P;BURET A	AVIAN GIARDIA; G. DUODENALIS; CAUDAL FLAGELLA; SULPHUR-CRESTED COCKATOO; (CACATUA GALERITA)	IBIS THRESKIORNIS-SPINICOLLIS; DUODENALIS; SEQUENCE; ARDEAE	MCDONNELL, PA (CORRESPONDING AUTHOR), GRIFFITH UNIV, FAC SCI, SCH BIOMOL \& BIOMED SCI, KESSELS RD, NATHAN, QLD 4111, AUSTRALIA.; GRIFFITH UNIV, FAC SCI, SCH BIOMOL \& BIOMED SCI, NATHAN, QLD 4111, AUSTRALIA.; QUEENSLAND INST MED RES, BANCROFT CTR, HERSTON, QLD 4029, AUSTRALIA.; UNIV CALGARY, DEPT BIOL SCI, CALGARY, AB T2N 1N4, CANADA.	THE INTESTINAL, PARASITIC PROTOZOA COMPRISING THE GENUS GIARDIA ARE MAJOR AETIOLOGICAL AGENTS OF DIARRHOEAL DISEASE IN NUMEROUS VERTEBRATES, INCLUDING HUMANS, LIVESTOCK AND DOMESTIC PETS. IN PREVIOUS INVESTIGATIONS, MORPHOLOGICAL CHARACTERISTICS, IN PARTICULAR CAUDAL FLAGELLAR LENGTH AND ASYMMETRY, HAVE BEEN USED TO DISTINGUISH AVIAN FROM MAMMALIAN GIARDIA SPECIES, WITH SCANNING ELECTRON MICROSCO…	HACKERBRUCKE 6, 80335 MUNICH, GERMANY	NA	A.MCDONNELL@MAILBOX.GU.EDU.AU	NA	NA	NA	2020-10-26	496VX	10.1078/0932-4739-00818	NA	NA	1618-0429	NA	NA	NA	NA	NA	0932-4739	EUR. J. PROTISTOL.	EUROPEAN JOURNAL OF PROTISTOLOGY	ENGLISH	NA	OCT	NA	30	3	NA	NA	NA	273-280	ELSEVIER GMBH	MICROBIOLOGY	NA	NA	2	MORPHOLOGICAL IDENTIFICATION MARKERS FOR DISTINGUISHING AVIAN FROM MAMMALIAN GIARDIA SPECIES - DO THEY NEED RECONSIDERATION?	ARTICLE	0	2	37	MICROBIOLOGY
ISI000172444100003	rejected off topic illegal trade	Ada Sanchez	EVANS M, 2001, IN PRACTICE	EVANS M	NA	NA	NA	THE MAJORITY, OF PARROTS PURCHASED AS PETS, ARE FIRST GENERATION OFFSPRING BRED IN CAPTIVITY OR IMPORTED WILD-CAUGHT SPECIMENS AND ARE OFTEN BOUGHT ON IMPULSE. AS THESE BIRDS ARE NON-DOMESTICATED ANIMALS, OWNERS NEED TO HAVE SOME UNDERSTANDING OF THE NATURAL HISTORY OF THE PARTICULAR SPECIES OF PARROT THEY ARE BUYING AS WELL AS ITS SOCIAL PATTERNS. THIS IS VITAL IF THEY ARE TO CREATE A SUITABLE E…	7 MANSFIELD ST, LONDON W1M 0AT, ENGLAND	NA	NA	NA	NA	NA	2020-10-26	497FE	NA	NA	NA	2042-7689	NA	NA	NA	NA	NA	0263-841X	IN PRACTICE	IN PRACTICE	ENGLISH	NA	NOV-DEC	NA	6	10	NA	NA	NA	596	BRITISH VETERINARY ASSOC	VETERINARY SCIENCES	NA	NA	6	ENVIRONMENTAL ENRICHMENT FOR PET PARROTS	ARTICLE	0	26	23	VETERINARY SCIENCES
ISI000172481300001	rejected off topic illegal trade	Ada Sanchez	CAVANAGH D, 2001, AVIAN PATHOL	CAVANAGH D	NA	INFECTIOUS-BRONCHITIS VIRUS; POLYMERASE-CHAIN-REACTION;; NEWCASTLE-DISEASE VIRUS; RESTRICTION ENDONUCLEASE ANALYSIS; DROP; SYNDROME VIRUS; SMALL ROUND VIRUS; SUBGROUP-J; LEUKOSIS VIRUS; BURSAL; DISEASE; MAREKS-DISEASE	CAVANAGH, D (CORRESPONDING AUTHOR), INST ANIM HLTH, COMPTON LAB, NEWBURY RG20 7NN, BERKS, ENGLAND.; INST ANIM HLTH, COMPTON LAB, NEWBURY RG20 7NN, BERKS, ENGLAND.	POLYMERASE CHAIN REACTION (PCR)-BASED APPROACHES TO THE DETECTION, DIFFERENTIATION AND CHARACTERIZATION OF AVIAN PATHOGENS CONTINUE TO BE DEVELOPED AND REFINED. THE PCRS, OR REVERSE TRANSCRIPTASE-PCRS, MAY BE GENERAL, DESIGNED TO DETECT ALL OR MOST VARIANTS OF A PATHOGEN, OR TO BE SEROTYPE, GENOTYPE OR PATHOTYPE SPECIFIC. PROGRESS IS BEING MADE WITH RESPECT TO MAKING NUCLEIC ACID APPROACHES MORE …	2-4 PARK SQUARE, MILTON PARK, ABINGDON OR14 4RN, OXON, ENGLAND	NA	DAVE.CAVANAGH@BBSRC.AC.UK	NA	NA	NA	2020-10-26	497XT	10.1080/03079450120092071	NA	NA	1465-3338	NA	NA	NA	NA	NA	0307-9457	AVIAN PATHOL.	AVIAN PATHOLOGY	ENGLISH	NA	DEC	NA	116	6	BRONZE	NA	NA	581-598	TAYLOR \& FRANCIS LTD	VETERINARY SCIENCES	NA	NA	25	INNOVATION AND DISCOVERY: THE APPLICATION OF NUCLEIC ACID-BASED TECHNOLOGY TO AVIAN VIRUS DETECTION AND CHARACTERIZATION	REVIEW	0	11	30	VETERINARY SCIENCES
ISI000172523800001	rejected off topic illegal trade	Ada Sanchez	PATEL AM, 2001, J ALLERGY CLIN IMMUNOL	PATEL AM;RYU JH;REED CE	HYPERSENSITIVITY PNEUMONITIS; IMMUNOPATHOGENESIS; LYMPHOCYTES; ANTIBODY;; CYTOKINES; CHEMOKINES; ADHESION MOLECULES; CAUSATIVE AGENTS; DIAGNOSIS;; PROGNOSIS; HIGH-RESOLUTION COMPUTED TOMOGRAPHY; BRONCHOALVEOLAR LAVAGE;; PATHOLOGY	EXTRINSIC ALLERGIC ALVEOLITIS; BRONCHOALVEOLAR LAVAGE FLUID;; PIGEON-BREEDERS DISEASE; IMMUNOLOGICAL LUNG-DISEASE; BIRD FANCIERS LUNG;; MAST-CELL TRYPTASE; HIGH-RESOLUTION CT; ACUTE FARMERS LUNG; PULMONARY; FIBROSIS; AIRWAY LESIONS	PATEL, AM (CORRESPONDING AUTHOR), MAYO CLIN, DEPT INTERNAL MED, DIV PULM \& CRIT CARE MED, MAYO BLDG E 18,200 1ST ST SW, ROCHESTER, MN 55905 USA.; MAYO CLIN, DEPT INTERNAL MED, DIV PULM \& CRIT CARE MED, ROCHESTER, MN 55905 USA.; MAYO CLIN, DEPT INTERNAL MED, DIV ALLERG DIS, ROCHESTER, MN 55905 USA.	HYPERSENSITIVITY PNEUMONITIS (EXTRINSIC ALLERGIC ALVEOLITIS) CAUSED BY INHALED ALLERGENS CAN PROGRESS TO DISABLING OR EVEN FATAL END-STAGE LUNG DISEASE. THE ONLY TRULY EFFECTIVE TREATMENT IS EARLY RECOGNITION AND CONTROL OF EXPOSURE. ALTHOUGH PATIENTS PRODUCE ANTIBODY EXUBERANTLY, THE IMMUNOPATHOGENESIS INVOLVES CELLULAR IMMUNITY-NOTABLY, CD8() CYTOTOXIC LYMPHOCYTES, MULTINUCLEATE GIANT CELL GRAN…	11830 WESTLINE INDUSTRIAL DR, ST LOUIS, MO 63146-3318 USA	NA	NA	NA	NA	NA	2020-10-26	498RG	NA	NA	NA	NA	NA	NA	NA	NA	NA	0091-6749	J. ALLERGY CLIN. IMMUNOL.	JOURNAL OF ALLERGY AND CLINICAL IMMUNOLOGY	ENGLISH	NA	NOV	NA	91	5	NA	RYU, JAY/0000-0002-9576-2272	NA	661-670	MOSBY, INC	ALLERGY; IMMUNOLOGY	NA	NA	179	HYPERSENSITIVITY PNEUMONITIS: CURRENT CONCEPTS AND FUTURE QUESTIONS	REVIEW	0	13	108	ALLERGY; IMMUNOLOGY
ISI000172821400004	rejected off topic parrots	Ada Sanchez	FEARN S, 2001, WILDL RES	FEARN S;ROBINSON B;SAMBONO J;SHINE R	NA	SEXUAL SIZE DIMORPHISM; DIAMOND PYTHONS; FOOD-HABITS; BODY-SIZE; SNAKES;; SERPENTES; ENVIRONMENT; POPULATIONS; BOIDAE	FEARN, S (CORRESPONDING AUTHOR), JAMES COOK UNIV N QUEENSLAND, SCH BIOL SCI, TOWNSVILLE, QLD 4811, AUSTRALIA.; JAMES COOK UNIV N QUEENSLAND, SCH BIOL SCI, TOWNSVILLE, QLD 4811, AUSTRALIA.; UNIV SYDNEY, SCH BIOL SCI, SYDNEY, NSW 2006, AUSTRALIA.	CARPET PYTHONS (MORELIA SPILOTA) ARE LARGE (TO >4 M, 11 KG) NON-VENOMOUS SNAKES THAT ARE WIDELY DISTRIBUTED ACROSS MAINLAND AUSTRALIA. IN MANY PARTS OF THEIR RANGE, VIABLE POPULATIONS PERSIST EVEN IN HIGHLY DISTURBED URBAN AND SUBURBAN HABITATS. OVER A SIX-YEAR PERIOD, WE COLLECTED 258 `NUISANCE' PYTHONS FROM TWO CITIES (BRISBANE AND IPSWICH) IN SOUTH-EASTERN QUEENSLAND. MOST OF THESE SNAKES WERE…	150 OXFORD ST, PO BOX 1139, COLLINGWOOD, VICTORIA 3066, AUSTRALIA	NA	NA	NA	NA	NA	2020-10-26	503VD	10.1071/WR00106	NA	NA	NA	NA	NA	NA	NA	NA	1035-3712	WILDL. RES.	WILDLIFE RESEARCH	ENGLISH	NA	NA	NA	34	6	NA	NA	NA	573-579	C S I R O PUBLISHING	ENVIRONMENTAL SCIENCES \& ECOLOGY; ZOOLOGY	SHINE, RICHARD/B-8711-2008	NA	30	PYTHONS IN THE PERGOLA: THE ECOLOGY OF `NUISANCE' CARPET PYTHONS (MORELIA SPILOTA) FROM SUBURBAN HABITATS IN SOUTH-EASTERN QUEENSLAND	ARTICLE	0	29	28	ECOLOGY; ZOOLOGY
ISI000173000300001	included in review	Ada Sanchez	MARSDEN SJ, 2001, BIRD CONSERV INT	MARSDEN SJ;PILGRIM JD;WILKINSON R	NA	NESTING REQUIREMENTS; HORNBILL; PARROT; WEST	MARSDEN, SJ (CORRESPONDING AUTHOR), MANCHESTER METROPOLITAN UNIV, DEPT GEOG \& ENVIRONM SCI, APPL ECOL GRP, CHESTER ST, MANCHESTER M1 5GD, LANCS, ENGLAND.; MANCHESTER METROPOLITAN UNIV, DEPT GEOG \& ENVIRONM SCI, APPL ECOL GRP, MANCHESTER M1 5GD, LANCS, ENGLAND.; N ENGLAND ZOOL SOC, CHESTER ZOO, CHESTER CH2 1LH, CHESHIRE, ENGLAND.	MOST RESEARCH ON COCKATOOS CACATUA OUTSIDE AUSTRALIA HAS FOCUSED ON SPECIES THAT FIGURE SIGNIFICANTLY IN THE PET TRADE. HERE, WE EXAMINE THE STATUS OF BLUE-EYED COCKATOO CACATUA OPHTHALMICA, AN EXTREMELY POORLY KNOWN SPECIES ENDEMIC TO THE ISLAND OF NEW BRITAIN, IN THREE LOWLAND FOREST TYPES: PRIMARY FOREST, FOREST THAT HAD BEEN COMMERCIALLY LOGGED OF SELECTED LARGE TREES IN THE PREVIOUS EIGHT YE…	32 AVENUE OF THE AMERICAS, NEW YORK, NY 10013-2473 USA	NA	NA	NA	NA	NA	2020-10-26	506YX	NA	NA	NA	1474-0001	NA	NA	NA	NA	NA	0959-2709	BIRD CONSERV. INT.	BIRD CONSERVATION INTERNATIONAL	ENGLISH	NA	SEP	NA	20	3	NA	NA	NA	151-160	CAMBRIDGE UNIV PRESS	BIODIVERSITY \& CONSERVATION; ZOOLOGY	NA	NA	13	STATUS, ABUNDANCE AND HABITAT USE OF BLUE-EYED COCKATOO CACATUA OPHTHALMICA ON NEW BRITAIN, PAPUA NEW GUINEA	ARTICLE	0	9	11	BIODIVERSITY CONSERVATION; ORNITHOLOGY
ISI000174356000002	rejected off topic illegal trade	Ada Sanchez	MANCIANTI F, 2002, MYCOPATHOLOGIA	MANCIANTI F;NARDONI S;CECCHERELLI R	BIRDS; CANDIDA SPP.; DROPPINGS; PSITTACINES; YEASTS	CRYPTOCOCCUS-NEOFORMANS	MANCIANTI, F (CORRESPONDING AUTHOR), DIPARTIMENTO PATOL ANIM PROFILASSI \& IGIENE ALIME, VIALE PIAGGE 2, I-56100 PISA, ITALY.; DIPARTIMENTO PATOL ANIM PROFILASSI \& IGIENE ALIME, I-56100 PISA, ITALY.	THREE-HUNDRED TWENTY FIVE DROPPINGS FROM PARROTS RAISED IN THE PREMISES OF 4 BREEDERS AND IN SEVERAL PRIVATE HOUSEHOLDS WERE CULTURED FOR YEASTS. ONE-HUNDRED SIXTY DROPPINGS (49.2\%) RESULTED POSITIVE. FROM THESE SPECIMENS 212 ISOLATES BELONGING TO 27 DIFFERENT SPECIES WERE OBTAINED. MAINLY CANDIDA SPECIES SUCH AS C. ALBICANS, C. CATENULATA, C. CURVATA, C. FAMATA, C. GLABRATA, C. GUILLIERMONDI, C…	VAN GODEWIJCKSTRAAT 30, 3311 GZ DORDRECHT, NETHERLANDS	NA	MANCIANT@VET.UNIPI.IT	NA	NA	NA	2020-10-26	530KC	10.1023/A:1014576304894	NA	NA	1573-0832	NA	NA	NA	NA	NA	0301-486X	MYCOPATHOLOGIA	MYCOPATHOLOGIA	ENGLISH	NA	NA	NA	15	3	NA	NARDONI, SIMONA/0000-0002-9095-6326	NA	121-124	SPRINGER	MYCOLOGY	MANCIANTI, FRANCESCA/W-7841-2019	NA	63	OCCURRENCE OF YEASTS IN PSITTACINES DROPPINGS FROM CAPTIVE BIRDS IN ITALY	ARTICLE	0	6	153	MYCOLOGY
ISI000175149500005	rejected off topic illegal trade	Ada Sanchez	SMITH KA, 2002, COMPEND CONTIN EDUC PRACT VET	SMITH KA	NA	NA	SMITH, KA (CORRESPONDING AUTHOR), OHIO DEPT HLTH, 246 N HIGH ST, COLUMBUS, OH 43266 USA.; OHIO DEPT HLTH, COLUMBUS, OH 43266 USA.	NA	780 TOWNSHIP LINE RD, YARDLEY, PA 19067-4200 USA	NA	NA	NA	NA	NA	2020-10-26	544GH	NA	NA	NA	NA	NA	NA	NA	NA	NA	0193-1903	COMPEND. CONTIN. EDUC. PRACT. VET.	COMPENDIUM ON CONTINUING EDUCATION FOR THE PRACTICING VETERINARIAN	ENGLISH	NA	APR	NA	11	4	NA	NA	NA	328-335	VETERINARY LEARNING SYSTEMS	VETERINARY SCIENCES	NA	NA	4	COMPENDIUM OF MEASURES TO CONTROL CHLAMYDOPHILA PSITTACI (FORMERLY CHLAMYDIA PSITTACI) INFECTION AMONG HUMANS (PSITTACOSIS) AND PET BIRDS, 2002: DIAGNOSIS AND TREATMENT	ARTICLE	0	4	24	VETERINARY SCIENCES
ISI000175793400005	rejected off topic illegal trade	Ada Sanchez	[ANONYMOUS] A, 2002, COMPEND CONTIN EDUC PRACT VET	[ANONYMOUS] A	NA	NA	NA	NA	780 TOWNSHIP LINE RD, YARDLEY, PA 19067-4200 USA	NA	NA	NA	NA	NA	2020-10-26	555KN	NA	NA	NA	NA	NA	NA	NA	NA	NA	0193-1903	COMPEND. CONTIN. EDUC. PRACT. VET.	COMPENDIUM ON CONTINUING EDUCATION FOR THE PRACTICING VETERINARIAN	ENGLISH	NA	MAY	NA	1	5	NA	NA	NA	374	VETERINARY LEARNING SYSTEMS	VETERINARY SCIENCES	NA	NA	0	COMPENDIUM OF MEASURES TO CONTROL CHLAMYDOPHILA PSITTACI (FORMERLY CHLAMYDIA PSITTACI) INFECTION AMONG HUMANS (PSITTACOSIS) AND PET BIRDS, 2002: RECOMMENDATIONS AND REQUIREMENTS	ARTICLE	0	1	24	VETERINARY SCIENCES
ISI000176705600014	rejected off topic illegal trade	Ada Sanchez	HOEFER HL, 2001, PROCEEDINGS OF THE 22ND ANNUAL CONFERENCE AVIAN MEDICINE AND SURGERY	HOEFER HL	NA	NA	HOEFER, HL (CORRESPONDING AUTHOR), W HILLS ANIM HOSP, HUNTINGTON, NY USA.; W HILLS ANIM HOSP, HUNTINGTON, NY USA.	DISEASES OF THE CLOACA ARE OFTEN ENCOUNTERED IN A CLINICAL AVIAN PRACTICE. THIS ARTICLE REVIEWS THE NORMAL ANATOMY AND PHYSIOLOGY OF THE CLOACA AND DISCUSSES THE MOST COMMON CLOACAL PROBLEMS SEEN IN PET BIRDS.	MEMORIAL BLDG SUITE 291 610 N MAIN STREET, BLACKSBURG, VA 24060-3349 USA	NA	NA	NA	NA	PROCEEDINGS OF THE 22ND ANNUAL CONFERENCE AVIAN MEDICINE AND SURGERY	2020-10-26	BU68N	NA	NA	ROSTON, MA AND MARX, KL	NA	NA	NA	NA	NA	NA	NA	PROCEEDINGS OF THE 22ND ANNUAL CONFERENCE AVIAN MEDICINE AND SURGERY	PROCEEDINGS OF THE 22ND ANNUAL CONFERENCE AVIAN MEDICINE AND SURGERY	ENGLISH	NA	NA	22ND ANNUAL CONFERENCE ON AVIAN MEDICINE AND SURGERY, LANCASTER, PA, APR 29-30, 2001	6	NA	NA	NA	MID-ATLANTIC STATES ASSOC AVIAN VET	104-108	MID-ATLANTIC STATES ASSOC AVIAN VETERINARIANS	ZOOLOGY; VETERINARY SCIENCES	NA	NA	0	CLOACAL DISEASE IN PSITTACINE BIRDS	PROCEEDINGS PAPER	0	0	NA	ORNITHOLOGY; VETERINARY SCIENCES
ISI000176705600021	rejected off topic illegal trade	Ada Sanchez	RYAN T, 2001, PROCEEDINGS OF THE 22ND ANNUAL CONFERENCE AVIAN MEDICINE AND SURGERY	RYAN T	NA	DEPRESSION	RYAN, T (CORRESPONDING AUTHOR), FEATHERS SCALES \& TAILS VET HOSP, WESTMINSTER, MD USA.; FEATHERS SCALES \& TAILS VET HOSP, WESTMINSTER, MD USA.	BIRDS HAVE EVOLVED INTO OVER 8600 DIFFERENT SPECIES OCCUPYING ALL ECOLOGICAL ZONES ON EARTH - FROM THE ANTARCTIC TO THE TROPICS, AND FROM THE LAND TO THE SEA AND TO THE AIR.(1) ALTHOUGH A NUMBER OF SPECIES HAVE BEEN KEPT IN CAPTIVITY AS PETS AND COMPANIONS, MANY FALLACIES AND HALF TRUTHS EXIST ABOUT THEM AND THEIR CARE. THIS LECTURE WILL COVER SOME OF THE MORE COMMON HALF TRUTHS AND FALLACIES THA…	MEMORIAL BLDG SUITE 291 610 N MAIN STREET, BLACKSBURG, VA 24060-3349 USA	NA	NA	NA	NA	PROCEEDINGS OF THE 22ND ANNUAL CONFERENCE AVIAN MEDICINE AND SURGERY	2020-10-26	BU68N	NA	NA	ROSTON, MA AND MARX, KL	NA	NA	NA	NA	NA	NA	NA	PROCEEDINGS OF THE 22ND ANNUAL CONFERENCE AVIAN MEDICINE AND SURGERY	PROCEEDINGS OF THE 22ND ANNUAL CONFERENCE AVIAN MEDICINE AND SURGERY	ENGLISH	NA	NA	22ND ANNUAL CONFERENCE ON AVIAN MEDICINE AND SURGERY, LANCASTER, PA, APR 29-30, 2001	14	NA	NA	NA	MID-ATLANTIC STATES ASSOC AVIAN VET	155-161	MID-ATLANTIC STATES ASSOC AVIAN VETERINARIANS	ZOOLOGY; VETERINARY SCIENCES	NA	NA	1	COMMON FALLACIES ABOUT PSITTACINE CARE	PROCEEDINGS PAPER	0	0	NA	ORNITHOLOGY; VETERINARY SCIENCES
ISI000177889200001	included in review	Ada Sanchez	DREWS C, 2001, SOC ANIM	DREWS C	CAPTIVITY; PET; PSITTACID; WILDLIFE; CULTURE; ILLEGAL; BIODIVERSITY;; CONSERVATION; ANIMAL PROTECTION; WELFARE	NA	DREWS, C (CORRESPONDING AUTHOR), UNIV NACL, PROGRAMA REG MANEJO VIDA SILVESTRE, APARTADO 1350-3000, HEREDIA, COSTA RICA.; UNIV NACL, PROGRAMA REG MANEJO VIDA SILVESTRE, HEREDIA, COSTA RICA.	A NATIONWIDE SURVEY THAT INCLUDED PERSONAL INTERVIEWS IN 1,02 1 HOUSEHOLDS STUDIED THE INCIDENCE, SPECIES, AND NUMBERS OF NON-HUMAN ANIMALS KEPT IN COSTA RICAN HOUSEHOLDS. A TOTAL OF 71\% OF HOUSEHOLDS KEEP ANIMALS. THE PROPORTION OF HOUSEHOLDS KEEPING DOGS (53\%) IS 3.6 HIGHER THAN THE PROPORTION OF HOUSEHOLDS KEEPING CATS (15\%). IN ADDITION TO THE USUAL DOMESTIC OR COMPANION ANIMALS KEPT IN 66…	PLANTIJNSTRAAT 2, P O BOX 9000, 2300 PA LEIDEN, NETHERLANDS	NA	NA	NA	NA	NA	2020-10-26	591PJ	10.1163/156853001753639233	NA	NA	NA	NA	NA	NA	NA	NA	1063-1119	SOC. ANIM.	SOCIETY \& ANIMALS	ENGLISH	NA	NA	NA	31	2	NA	NA	NA	107-126	BRILL ACADEMIC PUBLISHERS	SOCIOLOGY; VETERINARY SCIENCES	NA	NA	25	WILD ANIMALS AND OTHER PETS KEPT IN COSTA RICAN HOUSEHOLDS: INCIDENCE, SPECIES AND NUMBERS	ARTICLE	1	12	9	SOCIOLOGY; VETERINARY SCIENCES
ISI000178072100005	rejected off topic illegal trade	JRFP	KLAPHAKE EA, 2002, J AVIAN MED SURG	KLAPHAKE EA;SMITH JL	EXOTIC-PET OWNERS; INTERPERSONAL ORIENTATION; SELF-MONITOR; EXPENDITURE; TENDENCIES; UTAH; REPTILES; SMALL MAMMALS; AVIAN	NA	KLAPHAKE, EA (CORRESPONDING AUTHOR), UNIV TENNESSEE, COLL VET MED, DEPT COMPARAT MED, POB 1071, KNOXVILLE, TN 37901 USA.; UNIV TENNESSEE, COLL VET MED, DEPT COMPARAT MED, KNOXVILLE, TN 37901 USA.; UNIV UTAH, DEPT PSYCHOL, SALT LAKE CITY, UT 84112 USA.	EXOTIC-ANIMAL PET OWNERS ARE A GROWING DEMOGRAPHIC GROUP AMONG INDIVIDUALS SEEKING VETERINARY CARE, YET VERY LITTLE INFORMATION IS KNOWN ABOUT THEIR SPECIFIC DEMOGRAPHICS, PERSONAL CHARACTERISTICS, AND EXPENDITURE TENDENCIES. A VOLUNTARY, IN-CLINIC SURVEY WAS PERFORMED TO GATHER PRELIMINARY DATA IN THESE AREAS ON OWNERS AT AN EXCLUSIVELY EXOTIC-ANIMAL HOSPITAL IN UTAH. OF THE 115 OWNERS COMPLETIN…	PO BOX 811720, BOCA RATON, FL 33481 USA	NA	NA	NA	NA	NA	2020-10-26	594VL	10.1647/1082-6742(2002)016[0115:AIAOEA]2.0.CO;2	NA	NA	NA	NA	NA	NA	NA	NA	1082-6742	J. AVIAN MED. SURG.	JOURNAL OF AVIAN MEDICINE AND SURGERY	ENGLISH	NA	JUN	NA	12	2	NA	AYIBIOWU, OLUSOLA DAVID,/0000-0002-6478-8779	NA	115-122	ASSOC AVIAN VETERINARIANS	VETERINARY SCIENCES	NA	NA	6	AN INITIAL ASSESSMENT OF EXOTIC-ANIMAL PET OWNERS IN UTAH: A SURVEY WITH SPECIAL EMPHASIS ON PERSONAL CHARACTERISTICS AND EXPENDITURE TENDENCIES	ARTICLE	1	18	16	VETERINARY SCIENCES
ISI000179269400008	rejected off topic illegal trade	Ada Sanchez	RIGGS SM, 2002, VET HUMAN TOXICOL	RIGGS SM;PUSCHNER B;TELL LA	NA	INTOXICATION; ZINC	RIGGS, SM (CORRESPONDING AUTHOR), 520 ALVARADO AVE, DAVIS, CA 95616 USA.; UNIV CALIF DAVIS, TOXICOL LAB, CALIF ANIM HLTH \& FOOD SAFETY LAB SYST, DAVIS, CA 95616 USA.; UNIV CALIF DAVIS, SCH VET MED, DEPT MED \& EPIDEMIOL, DAVIS, CA 95616 USA.	AN ADULT MALE, DOUBLE-YELLOW-HEAD AMAZON PARROT (AMAZONA OCHROCEPHALA-ORATRIX) WAS PRESENTED WITH A 36-H HISTORY OF SEIZURE EPISODES. ON PRESENTATION, THE BIRD WAS SLIGHTS OBTUNDED, SEIZURED ONCE FOR APPROXIMATELY 20 SEC AND THE SEIZURE WAS CONTROLLED WITH MIDAZOLAM. WHOLE BODY RADIOGRAPHS REVEALED A 2-MM DIAMETER, CIRCULAR, DENSE OBJECT IN THE VENTRICULUS. A PRESUMPTIVE DIAGNOSIS WAS MADE OF LEA…	KANSAS STATE UNIV, MANHATTAN, KS 66506-5606 USA	NA	NA	NA	NA	NA	2020-10-26	615WC	NA	NA	NA	NA	NA	NA	NA	NA	NA	0145-6296	VET. HUMAN TOXICOL.	VETERINARY AND HUMAN TOXICOLOGY	ENGLISH	NA	DEC	NA	20	6	NA	PUSCHNER, BIRGIT/0000-0001-6765-5085	NA	345-348	COMPARATIVE TOXICOLOGY LAB	TOXICOLOGY; VETERINARY SCIENCES	NA	NA	1	MANAGEMENT OF AN INGESTED LEAD FOREIGN BODY IN AN AMAZON PARROT	ARTICLE	0	10	44	TOXICOLOGY; VETERINARY SCIENCES
ISI000182306500006	rejected off topic illegal trade	Ada Sanchez	NETT CS, 2003, COMPEND CONTIN EDUC PRACT VET1	NETT CS;TULLY TN	NA	NA	NETT, CS (CORRESPONDING AUTHOR), LOUISIANA STATE UNIV, BATON ROUGE, LA 70803 USA.; LOUISIANA STATE UNIV, BATON ROUGE, LA 70803 USA.	AVIAN DERMATOLOGY IS AN IMPORTANT SEGMENT OF COMPANION BIRD PRACTICE, AND A THOROUGH UNDERSTANDING OF THE NORMAL INTEGUMENT AND THE FEATHER CYCLE IS NECESSARY TO PRACTICE THIS SPECIALTY. THE MOST COMMON COMPLAINT ENCOUNTERED IN AVIAN DERMATOLOGY IS FEATHER LOSS OR DAMAGE, WITH FEATHER PICKING BEING THE MOST COMMON AND DEVASTATING DERMATOLOGIC DISEASE IN PET BIRDS, ESPECIALLY IN PSITTACINES. THIS …	425 PHILLIPS BLVD \#100, TRENTON, NJ 08618 USA	NA	NA	NA	NA	NA	2020-10-26	668RG	NA	NA	NA	NA	NA	NA	NA	NA	NA	0193-1903	COMPEND. CONTIN. EDUC. PRACT. VET.	COMPENDIUM ON CONTINUING EDUCATION FOR THE PRACTICING VETERINARIAN	ENGLISH	NA	MAR	NA	20	3	NA	NA	NA	206	VETERINARY LEARNING SYSTEMS	VETERINARY SCIENCES	NA	NA	8	ANATOMY, CLINICAL PRESENTATION, AND DIAGNOSTIC APPROACH TO FEATHER-PICKING PET BIRDS	ARTICLE	0	11	25	VETERINARY SCIENCES
ISI000182554500021	rejected off topic illegal trade	Ada Sanchez	WELADJI RB, 2003, ORYX	WELADJI RB;TCHAMBA MN	BENOUE WILDLIFE CONSERVATION AREA; CAMEROON; CROP DAMAGE; HUMAN-WILDLIFE; CONFLICT; LIVESTOCK; PROTECTED AREAS	NATIONAL-PARK; LOCAL PEOPLE; CROP DAMAGE; ELEPHANTS; ATTITUDES; RESERVE;; ANIMALS; UGANDA	WELADJI, RB (CORRESPONDING AUTHOR), AGR UNIV NORWAY, DEPT ANIM SCI, POB 5025, N-1432 AS, NORWAY.; AGR UNIV NORWAY, CTR INT ENVIRONM \& DEV STUDIES, NORAGRIC, N-1432 AS, NORWAY.; WWF, CAMEROON PROGRAMME OFF, YAOUNDE, CAMEROON.	KNOWLEDGE OF CONFLICTS BETWEEN PEOPLE AND PROTECTED AREAS IS REQUIRED FOR THE DESIGN OF SUSTAINABLE CONSERVATION STRATEGIES FOR THE MANAGEMENT OF MOST PROTECTED AREAS. THIS STUDY IDENTIFIES THE CAUSES OF CONFLICTS BETWEEN LOCAL PEOPLE AND THE BENOUE WILDLIFE CONSERVATION AREA (BWCA), WHICH INCLUDES THE BENOUE NATIONAL PARK, IN NORTHERN CAMEROON. INFORMAL INTERVIEWS AND QUESTIONNAIRES WERE ADMINIS…	40 WEST 20TH ST, NEW YORK, NY 10011-4221 USA	NA	NA	NA	NA	NA	2020-10-26	672ZT	10.1017/S0030605303000140	NA	NA	NA	NA	NA	NA	NA	NA	0030-6053	ORYX	ORYX	ENGLISH	NA	JAN	NA	23	1	BRONZE	NA	NA	72-79	CAMBRIDGE UNIV PRESS	BIODIVERSITY \& CONSERVATION; ENVIRONMENTAL SCIENCES \& ECOLOGY	NA	NA	61	CONFLICT BETWEEN PEOPLE AND PROTECTED AREAS WITHIN THE BENOUE WILDLIFE CONSERVATION AREA, NORTH CAMEROON	ARTICLE	1	52	37	BIODIVERSITY CONSERVATION; ECOLOGY
ISI000182621600002	rejected off topic illegal trade	Ada Sanchez	ROSEN T, 2003, DERMATOL CLIN	ROSEN T;JABLON J	NA	TRICHOPHYTON-MENTAGROPHYTES VAR; CAPTIVE GREEN IGUANAS;; CRYPTOCOCCUS-NEOFORMANS; RICKETTSIA-PROWAZEKII; EPIDEMIC TYPHUS;; CR-NEOFORMANS; FECAL MATTER; ERINACEI; ANIMALS; SALMONELLOSIS	ROSEN, T (CORRESPONDING AUTHOR), BAYLOR COLL MED, DEPT DERMATOL, 2815 PLUMB, HOUSTON, TX 77005 USA.; BAYLOR COLL MED, DEPT DERMATOL, HOUSTON, TX 77005 USA.; ST JOSEPH MERCY HOSP, DEPT INTERNAL MED, ANN ARBOR, MI 48106 USA.	ABOUT ONE MILLION HOUSEHOLDS IN THE UNITED STATES CURRENTLY HAVE EXOTIC PETS, INCLUDING, BUT NOT LIMITED TO, HEDGEHOGS, FLYING SQUIRRELS, IGUANAS, CHINCHILLAS, AND COCKATOOS. HEALTH CARE PROVIDERS ARE POORLY INFORMED CONCERNING THE POTENTIAL HAZARDS OF EXOTIC PET OWNERSHIP. THIS ARTICLE REVIEWS THE MOST IMPORTANT LITERATURE ON THIS SUBJECT AND HIGHLIGHTS THE NECESSITY FOR OBTAINING AN ADEQUATE HI…	1600 JOHN F KENNEDY BOULEVARD, STE 1800, PHILADELPHIA, PA 19103-2899 USA	NA	TEDROSENMD@AOL.COM	NA	NA	NA	2020-10-26	674DK	10.1016/S0733-8635(02)00090-6	NA	NA	1558-0520	NA	NA	NA	NA	NA	0733-8635	DERMATOL. CLIN.	DERMATOLOGIC CLINICS	ENGLISH	NA	APR	NA	58	2	NA	ROSEN, TED/0000-0002-5946-5529	NA	229	W B SAUNDERS CO-ELSEVIER INC	DERMATOLOGY	NA	NA	14	INFECTIOUS THREATS FROM EXOTIC PETS: DERMATOLOGICAL IMPLICATIONS	ARTICLE	0	16	21	DERMATOLOGY
ISI000182622800005	included in review	Ada Sanchez	RILEY J, 2003, BIRD CONSERV INT	RILEY J	NA	NA	RILEY, J (CORRESPONDING AUTHOR), WILDLIFE CONSERVAT SOC, INDONESIA PROGRAM, POB 1131,MANADO 95000, SULAWESI, INDONESIA.; ACT SAMPIRI, SEAHOUSES NE68 7XA, NORTHD, ENGLAND.	KARAKELANG, LARGEST OF THE TALAUD ISLANDS, INDONESIA, WAS VISITED IN 1999 WITH THE AIM OF PRODUCING POPULATION ESTIMATES OF GLOBALLY THREATENED AND RESTRICTED-RANGE BIRD SPECIES. DENSITY ESTIMATES WERE CALCULATED FROM PRIMARY FOREST AND SECONDARY HABITATS USING THE VARIABLE CIRCULAR PLOT METHOD. EIGHT OF THE NINE RESTRICTED-RANGE OR THREATENED SPECIES RESIDENT ON KARAKELANG WERE RECORDED AND DENS…	40 WEST 20TH ST, NEW YORK, NY 10011-4221 USA	NA	NA	NA	NA	NA	2020-10-26	674DX	10.1017/S0959270903003058	NA	NA	NA	NA	NA	NA	NA	NA	0959-2709	BIRD CONSERV. INT.	BIRD CONSERVATION INTERNATIONAL	ENGLISH	NA	MAR	NA	29	1	BRONZE	NA	NA	59-74	CAMBRIDGE UNIV PRESS	BIODIVERSITY \& CONSERVATION; ZOOLOGY	NA	NA	13	POPULATION SIZES AND THE CONSERVATION STATUS OF ENDEMIC AND RESTRICTED-RANGE BIRD SPECIES ON KARAKELANG, TALAUD ISLANDS, INDONESIA	ARTICLE	2	21	13	BIODIVERSITY CONSERVATION; ORNITHOLOGY
ISI000184487500002	rejected off topic illegal trade	Ada Sanchez	LEVINE BS, 2003, SEMIN AVIAN EXOT PET MED	LEVINE BS	AVIAN; MEDICINE; HUSBANDRY; PSITTACINE; AMAZON; AFRICAN GREY; GRASS; PARAKEETS; ROSELLAS; NEOPHEMA; AMAZONA	DIAGNOSIS; POX	LEVINE, BS (CORRESPONDING AUTHOR), 1142 EL CAMINO REAL, TUSTIN, CA 92780 USA.; BIRD \& EXOT ANIM PRACTICE ORANGE CTY, TUSTIN, CA USA.	AMAZONS, AUSTRALIAN PARAKEETS, AND AFRICAN GREY PARROTS ARE MORE AND MORE BECOMING POPULAR PETS, IN ORDER TO PROVIDE BETTER SERVICE TO THESE SPECIES, THE VETERINARY PRACTITIONER MUST BECOME FAMILIAR WITH THEIR COMMON MEDICAL PROBLEMS. IN THIS ARTICLE, WE WILL DISCUSS THE COMMON MEDICAL DISORDERS SEEN IN THESE SPECIES. (C) 2003 ELSEVIER INC. ALL RIGHTS RESERVED.	1600 JOHN F KENNEDY BOULEVARD, STE 1800, PHILADELPHIA, PA 19103-2899 USA	NA	NA	NA	NA	NA	2020-10-26	707AP	10.1053/saep.2003.00020-3	NA	NA	NA	NA	NA	NA	NA	NA	1055-937X	SEMIN. AVIAN EXOT. PET MED.	SEMINARS IN AVIAN AND EXOTIC PET MEDICINE	ENGLISH	NA	JUL	NA	76	3	NA	NA	NA	125-130	W B SAUNDERS CO-ELSEVIER INC	VETERINARY SCIENCES	NA	NA	8	COMMON DISORDERS OF AMAZONS, AUSTRALIAN PARAKEETS, AND AFRICAN GREY PARROTS	ARTICLE	0	4	12	VETERINARY SCIENCES
ISI000184854800012	rejected off topic illegal trade	Ada Sanchez	JOHNE R, 2003, TIERARZTL PRAX AUSG KLEINTIERE HEIMTIERE	JOHNE R;RAUE R;KRAUTWALD-JUNGHANNS ME;MULLER H	PET BIRDS; WILD BIRDS; PAPOVAVIRUSES; PAPILLOMAVIRUS; POLYOMAVIRUS;; INTERNAL PAPILLOMATOSIS OF PARROTS; BUDGERIGAR FLEDGLING DISEASE	BUDGERIGARS MELOPSITTACUS-UNDULATUS; AVIAN POLYOMAVIRUS; CLOACAL; PAPILLOMAS; AGNOPROTEIN 1A; VIRUS; PSITTACIFORMES; PARROTS; GENOME	JOHNE, R (CORRESPONDING AUTHOR), UNIV LEIPZIG, FAK VET MED, INST VIROL, TIERKLINIKEN 29, D-04103 LEIPZIG, GERMANY.; UNIV LEIPZIG, FAK VET MED, INST VIROL, D-04103 LEIPZIG, GERMANY.; UNIV LEIPZIG, FAK VET MED, KLIN KLEINTIERE, D-04103 LEIPZIG, GERMANY.	MEMBERS OF THE FAMILIES PAPILLOMAVIRIDAE AND POLYOMAVIRIDAE ARE THE CAUSATIVE AGENTS OF DISEASE IN PET BIRDS AS WELL AS IN WILD BIRDS. PAPILLOMAVIRUS INFECTIONS LEADING TO SKIN WARTS ON THE FEATHERLESS PARTS OF THE HEAD AND THE FEET ARE FOUND IN FINCHES AND CANARIES, IN RARE CASES ALSO IN PARROTS. ``INTERNAL PAPILLOMATOSIS OF PARROTS'' CHARACTERIZED BY THE FORMATION OF PAPILLOMAS IN THE CLOACAL M…	HOLDERLINSTRASSE 3, D-70174 STUTTGART, GERMANY	NA	NA	NA	NA	NA	2020-10-26	713JR	NA	NA	NA	NA	NA	NA	NA	NA	NA	1434-1239	TIERARZTL. PRAX. AUSG. KLEINTIERE HEIMTIERE	TIERARZTLICHE PRAXIS AUSGABE KLEINTIERE HEIMTIERE	GERMAN	NA	NA	NA	35	3	NA	NA	NA	188-193	SCHATTAUER GMBH-VERLAG MEDIZIN NATURWISSENSCHAFTEN	VETERINARY SCIENCES	NA	NA	2	PAPILLOMAVIRUS AND POLYOMAVIRUS INFECTIONS OF PET BIRDS AND WILD BIRDS: AN OVERVIEW	ARTICLE	1	11	31	VETERINARY SCIENCES
ISI000185187500008	rejected off topic parrots	Ada Sanchez	RAUE R, 2003, TIERARZTL PRAX AUSG KLEINTIERE HEIMTIERE	RAUE R;JOHNE R;KRAUTWALD-JUNGHANNS ME;MULLER H	PET BIRDS; PIGEONS; CIRCOVIRUS; PSITTACINE BEAK AND FEATHER DISEASE	PSITTACINE BEAK; FEATHER DISEASE; RACING PIGEONS; FRENCH MOLT; SEQUENCE;; DNA; VIRUS; PARTICLES; CANARIES	MULLER, H (CORRESPONDING AUTHOR), UNIV LEIPZIG, INST VIROL, FAK VET MED, TIERKLIN 29, D-04103 LEIPZIG, GERMANY.; UNIV LEIPZIG, INST VIROL, FAK VET MED, D-04103 LEIPZIG, GERMANY.	CIRCOVIRUS INFECTIONS OF BIRDS HAVE BEEN WELL-KNOWN SINCE A LONG TIME. BESIDES CHICKEN ANAEMIA VIRUS (CAV), PSITTACINE BEAK AND FEATHER DISEASE VIRUS (PBFDV) HAS TO BE MENTIONED IN THIS CONTEXT. MOST OF THE SPECIES IN THE ORDER PSITTACIFORMES AND SOME OTHER BIRD SPECIES ARE SUSCEPTIBLE TO PBFDV. USUALLY, NESTLINGS AND YOUNG PSITTACINE BIRDS ARE THE MOST AFFECTED, BUT SOMETIMES CLINICAL SIGNS OF P…	HOLDERLINSTRASSE 3, D-70174 STUTTGART, GERMANY	NA	NA	NA	NA	NA	2020-10-26	719DC	10.1055/s-0037-1622356	NA	NA	NA	NA	NA	NA	NA	NA	1434-1239	TIERARZTL. PRAX. AUSG. KLEINTIERE HEIMTIERE	TIERARZTLICHE PRAXIS AUSGABE KLEINTIERE HEIMTIERE	GERMAN	NA	NA	NA	37	4	NA	NA	NA	251-256	SCHATTAUER GMBH-VERLAG MEDIZIN NATURWISSENSCHAFTEN	VETERINARY SCIENCES	NA	NA	0	CIRCOVIRUS INFECTIONS OF PET BIRDS AND PIGEONS: AN OVERVIEW	ARTICLE	1	7	31	VETERINARY SCIENCES
ISI000185371200013	included in review	Ada Sanchez	GONZALEZ JA, 2003, BIOL CONSERV	GONZALEZ JA	CONSERVATION; HARVEST; PET TRADE; PARROTS; PERUVIAN AMAZON	NA	GONZALEZ, JA (CORRESPONDING AUTHOR), PROYECTO ARAUCARIA GALAPAGOS, AGCY ESPANOLA COOPERAC INT, QUITO, ECUADOR.; UNIV NACL AGRARIA LA MOLINA, AREA FAUNA SILVESTRE \& PARQUES NACL, LIMA, PERU.	IN SOME PLACES OF THE NORTHEASTERN PERUVIAN AMAZON THE HARVESTING AND LOCAL TRADE OF PARROT NESTLINGS IS STILL A COMMON PRACTICE (LOREADA) THAT TAKES PLACE EVERY YEAR BETWEEN FEBRUARY AND APRIL, DESPITE BEING BANNED BY THE NATIONAL LAWS. BETWEEN 1996 AND 1999, 1 MONITORED THE USE OF THESE BIRDS IN 3890-HA OF MAURITIA FLEXUOSA-PALM SWAMPS, LOCATED CLOSE TO THE VILLAGE OF VICTORIA (LORETO, PERU). S…	THE BOULEVARD, LANGFORD LANE, KIDLINGTON, OXFORD OX5 1GB, OXON, ENGLAND	NA	NA	NA	NA	NA	2020-10-26	722JD	10.1016/S0006-3207(03)00071-5	NA	NA	NA	NA	NA	NA	NA	NA	0006-3207	BIOL. CONSERV.	BIOLOGICAL CONSERVATION	ENGLISH	NA	DEC	NA	33	3	NA	GONZALEZ, JOSE/0000-0001-5917-9314	NA	437-446	ELSEVIER SCI LTD	BIODIVERSITY \& CONSERVATION; ENVIRONMENTAL SCIENCES \& ECOLOGY	GONZALEZ, JOSE/K-1321-2014	NA	59	HARVESTING, LOCAL TRADE, AND CONSERVATION OF PARROTS IN THE NORTHEASTERN PERUVIAN AMAZON	ARTICLE	1	30	114	BIODIVERSITY CONSERVATION; ECOLOGY; ENVIRONMENTAL SCIENCES
ISI000185524000019	included in review	Ada Sanchez	WADE LL, 2003, TAKE FLIGHT IN PITTSBURGH, PROCEEDINGS	WADE LL	NA	NA	WADE, LL (CORRESPONDING AUTHOR), ANIM MED CTR, 510 E 62ND ST, NEW YORK, NY 10021 USA.; ANIM MED CTR, NEW YORK, NY 10021 USA.	SEVERAL SPECIES OF AMAZON PARROTS ARE COMMON AS PETS; HOWEVER, MANY OTHER AMAZON SPECIES ARE ENDANGERED OR THREATENED WITH EXTINCTION. OF THE 27 EXTANT AMAZONA SPECIES, 9 ARE NATIVE TO THE CARIBBEAN ISLANDS AND ARE CONSIDERED AT HIGH RISK OF EXTINCTION. LOCAL CONSERVATION EFFORTS ARE VITAL IN PRESERVING THESE VANISHING SPECIES, SUCH AS THE THREATENED BAHAMA PARROT (AMAZONA LEUCOCEPHALA BAHAMENSIS…	PO BOX 18372, ORLANDO, FL 32861 USA	NA	NA	NA	NA	TAKE FLIGHT IN PITTSBURGH, PROCEEDINGS	2020-10-26	BX50T	NA	NA	BERGMAN, E	NA	NA	NA	NA	NA	NA	NA	TAKE FLIGHT IN PITTSBURGH, PROCEEDINGS	TAKE FLIGHT IN PITTSBURGH, PROCEEDINGS	ENGLISH	NA	NA	24TH ANNUAL CONFERENCE AND EXPO OF THE ASSOCIATION-OF-AVIAN-VETERINARIANS, PITTSBURGH, PA, AUG 26-28, 2003	16	NA	NA	NA	ASSOC AVIAN VET	83-90	ASSOC AVIAN VETERINARIANS	ZOOLOGY; VETERINARY SCIENCES	NA	NA	1	CONSERVATION OF THE BAHAMA PARROT (AMAZONA LEUCOCEPHALA BAHAMENSIS)	PROCEEDINGS PAPER	0	2	NA	ORNITHOLOGY; VETERINARY SCIENCES
ISI000185524000040	rejected off topic illegal trade	Ada Sanchez	SEIBERT LM, 2003, TAKE FLIGHT IN PITTSBURGH, PROCEEDINGS	SEIBERT LM	NA	NA	SEIBERT, LM (CORRESPONDING AUTHOR), ANIM EMERGENCY \& REFERRAL CTR, 19511-24TH AVE W, LYNNWOOD, WA 98036 USA.; ANIM EMERGENCY \& REFERRAL CTR, LYNNWOOD, WA 98036 USA.	THE CONCEPT OF DOMINANCE IS OFTEN MISUNDERSTOOD AND MISUSED IN THE VETERINARY LITERATURE. ADVERSE CONSEQUENCES ARISE WHEN A LACK OF UNDERSTANDING OF DOMINANCE RELATIONSHIPS RESULTS IN PET PSITTACINE BIRDS BEING RELEGATED TO LOWER PERCHING POSITIONS, OR OWNERS ARE ADVISED TO ASSERT THEIR DOMINANCE OVER THEIR PETS IN INAPPROPRIATE WAYS. WITH A FEW EXCEPTIONS, THE FLOCK SOCIAL BEHAVIORS OF MOST CAPT…	PO BOX 18372, ORLANDO, FL 32861 USA	NA	NA	NA	NA	TAKE FLIGHT IN PITTSBURGH, PROCEEDINGS	2020-10-26	BX50T	NA	NA	BERGMAN, E	NA	NA	NA	NA	NA	NA	NA	TAKE FLIGHT IN PITTSBURGH, PROCEEDINGS	TAKE FLIGHT IN PITTSBURGH, PROCEEDINGS	ENGLISH	NA	NA	24TH ANNUAL CONFERENCE AND EXPO OF THE ASSOCIATION-OF-AVIAN-VETERINARIANS, PITTSBURGH, PA, AUG 26-28, 2003	8	NA	NA	NA	ASSOC AVIAN VET	187-188	ASSOC AVIAN VETERINARIANS	ZOOLOGY; VETERINARY SCIENCES	NA	NA	0	SOCIAL DOMINANCE: THE PECK ORDER REVEALED	PROCEEDINGS PAPER	1	2	NA	ORNITHOLOGY; VETERINARY SCIENCES
ISI000185524000055	rejected off topic illegal trade	Ada Sanchez	ROSENTHAL KL, 2003, TAKE FLIGHT IN PITTSBURGH, PROCEEDINGS-a	ROSENTHAL KL	NA	AMAZON PARROTS; PHARMACOKINETICS	ROSENTHAL, KL (CORRESPONDING AUTHOR), UNIV PENN, DEPT CLIN STUDIES, 3900 DELANCEY ST, PHILADELPHIA, PA 19104 USA.; UNIV PENN, DEPT CLIN STUDIES, PHILADELPHIA, PA 19104 USA.	ANTIBACTERIALS AND ANTIFUNGALS ARE 2 OF THE MOST COMMONLY USED MEDICATIONS IN PET BIRD MEDICINE. THERE ARE MANY CHOICES OF ANTIBIOTICS FOR USE IN AVIAN PATIENTS. PENICILLINS ARE INFREQUENTLY USED IN AVIAN MEDICINE. THE USE OF CEPHALOSPORINS IN BIRDS IS USUALLY LIMITED TO THE HIGH DOSE AND INCREASED FREQUENCY OF ADMINISTRATION. FLUOROQUINOLONES HAVE BECOME ONE OF THE MOST USED CLASS OF DRUGS IN AV…	PO BOX 18372, ORLANDO, FL 32861 USA	NA	NA	NA	NA	TAKE FLIGHT IN PITTSBURGH, PROCEEDINGS	2020-10-26	BX50T	NA	NA	BERGMAN, E	NA	NA	NA	NA	NA	NA	NA	TAKE FLIGHT IN PITTSBURGH, PROCEEDINGS	TAKE FLIGHT IN PITTSBURGH, PROCEEDINGS	ENGLISH	NA	NA	24TH ANNUAL CONFERENCE AND EXPO OF THE ASSOCIATION-OF-AVIAN-VETERINARIANS, PITTSBURGH, PA, AUG 26-28, 2003	12	NA	NA	NA	ASSOC AVIAN VET	311-317	ASSOC AVIAN VETERINARIANS	ZOOLOGY; VETERINARY SCIENCES	NA	NA	0	ANTIMICROBIAL USE IN BIRDS: A REVIEW	PROCEEDINGS PAPER	2	13	NA	ORNITHOLOGY; VETERINARY SCIENCES
ISI000185695900001	rejected off topic illegal trade	Ada Sanchez	KALETA EF, 2003, AVIAN PATHOL	KALETA EF;TADAY EMA	NA	CHLAMYDIA-PSITTACI INFECTIONS; RESTRICTION-ENDONUCLEASE ANALYSIS;; POLYMERASE-CHAIN-REACTION; FREE-LIVING BIRDS; LYMPHOGRANULOMA VENEREUM;; MONOCLONAL-ANTIBODIES; COMPLEMENT-FIXATION; CELL-CULTURE; WILD BIRDS;; MICROIMMUNOFLUORESCENCE TEST	KALETA, EF (CORRESPONDING AUTHOR), UNIV GIESSEN, FAC VET MED, KLIN VOGEL REPTILIEN AMPHIBIEN \& FIS, FRANNKFURTER STR 91-93, D-35392 GIESSEN, GERMANY.; UNIV GIESSEN, FAC VET MED, KLIN VOGEL REPTILIEN AMPHIBIEN \& FIS, D-35392 GIESSEN, GERMANY.	PUBLISHED REPORTS AND OUR OWN DIAGNOSTIC DATA ON THE AVIAN HOST RANGE OF AVIAN CHLAMYDOPHILA SPP. ARE PRESENTED IN AN ATTEMPT TO PROVIDE EVIDENCE FOR THE LARGE NUMBER OF BIRD SPECIES THAT HAVE BEEN NATURALLY INFECTED WITH CHLAMYDIA. THE TERM `CHLAMYDIA-POSITIVE' IS BASED ON EITHER ISOLATION OF THE ORGANISM AND ANTIGEN DETECTION OR ON SEROLOGICAL DETECTION OF CIRCULATING ANTIBODIES. THE LIST OF CH…	2-4 PARK SQUARE, MILTON PARK, ABINGDON OR14 4RN, OXON, ENGLAND	NA	ERHARD.F.KALETA@VETMED.UNI-GIESSEN.DE	NA	NA	NA	2020-10-26	728BT	10.1080/03079450310001593613	NA	NA	1465-3338	NA	NA	NA	NA	NA	0307-9457	AVIAN PATHOL.	AVIAN PATHOLOGY	ENGLISH	NA	OCT	NA	260	5	BRONZE	NA	NA	435-462	TAYLOR \& FRANCIS LTD	VETERINARY SCIENCES	NA	NA	176	AVIAN HOST RANGE OF CHLAMYDOPHILA SPP. BASED ON ISOLATION, ANTIGEN DETECTION AND SEROLOGY	REVIEW	0	27	32	VETERINARY SCIENCES
ISI000186230100007	rejected off topic illegal trade	Ada Sanchez	FODOR K, 2003, MAGY ALLATORV LAPJA	FODOR K;MOLNAR V;BEREGI A;FELKAI F;FEKETE S	NA	FOOD	FODOR, K (CORRESPONDING AUTHOR), AOTK, SZIE, ALLATTENYESZTESI TAKARMANYOZASTANI \& LABORALLAT T, ISTVAN 2, H-1078 BUDAPEST, HUNGARY.; AOTK, SZIE, ALLATTENYESZTESI TAKARMANYOZASTANI \& LABORALLAT T, H-1078 BUDAPEST, HUNGARY.; AOTK, SZIE, BELGYOGYASZATI TANSZEK \& KLIN, BUDAPEST, HUNGARY.	THE NUMBER OF PET BIRDS IS INCREASING IN THESE YEARS AND THEY BECOME MORE AND MORE POPULAR. NUTRITIONAL DISORDERS OF THESE ANIMALS ARE COMMON. IN THE SECOND PART OF THE ARTICLE THE AUTHORS DESCRIBE THOROUGHLY THE NUTRITION OF THE COMMON PET BIRDS (PASSERINES, PIGEONS, PARROTS AND MYNAH BIRDS) WHICH BASED ON THE LITERATURE AND THEIR KNOWLEDGE. FURTHER ON THEY GIVE SOME RECOMMENDATION ABOUT THE FEE…	PO BOX 16, 1631 BUDAPEST, HUNGARY	NA	NA	NA	NA	NA	2020-10-26	737KT	NA	NA	NA	NA	NA	NA	NA	NA	NA	0025-004X	MAGY. ALLATORV. LAPJA	MAGYAR ALLATORVOSOK LAPJA	HUNGARIAN	NA	OCT	NA	29	10	NA	NA	NA	617-623	MEZOGAZDA KIADO KFT	VETERINARY SCIENCES	NA	NA	0	BASIC KNOWLEDGE OF PET BIRDS' NUTRITION 2. DETAILED NUTRITION	ARTICLE	0	8	125	VETERINARY SCIENCES
ISI000186599300011	rejected off topic illegal trade	JRFP	MOEGENBURG SM, 2003, ECOLOGY	MOEGENBURG SM;LEVEY DJ	AMAZONIA; BRAZIL; EUTERPE OLERACEA; EXTRACTIVE RESERVES; FRUIT-FRUGIVORE; INTERACTIONS; FRUIT HARVEST; FRUIT TRACKING; NON-TIMBER FOREST PRODUCTS;; PALM TREES; PARROTS; VERTEBRATE POPULATION ECOLOGY	EATING BIRDS STAY; TEMPORAL VARIATION; RESOURCE AVAILABILITY; FOOD; AVAILABILITY; ELEVATIONAL GRADIENT; FOREST PRODUCTS; FLESHY FRUITS;; LONG; PLANTS; PHENOLOGY	MOEGENBURG, SM (CORRESPONDING AUTHOR), SMITHSONIAN INST, NATL ZOOL PK, SMITHSONIAN MIGRATORY BIRD CTR, WASHINGTON, DC 20008 USA.; UNIV FLORIDA, DEPT ZOOL, GAINESVILLE, FL 32611 USA.	MANY NONEXPERIMENTAL STUDIES HAVE SHOWN POSITIVE CORRELATIONS BETWEEN RESOURCE ABUNDANCE AND VERTEBRATE ABUNDANCE. THESE RELATIONSHIPS, HOWEVER, ARE DIFFICULT TO INTERPRET BECAUSE OF CONFOUNDING FACTORS THAT MAY INDEPENDENTLY DETERMINE THE ABUNDANCE OF VERTEBRATES AND THEIR RESOURCES. MOREOVER, VERIFYING LINKS BETWEEN VERTEBRATE AND RESOURCE ABUNDANCE IS COMPLEX BECAUSE HUMAN PERCEPTION OF RESOUR…	111 RIVER ST, HOBOKEN 07030-5774, NJ USA	NA	MOEGENBURAS@NZP.SI.EDU	NA	NA	NA	2020-10-26	743XR	10.1890/02-0063	NA	NA	1939-9170	NA	NA	NA	NA	NA	0012-9658	ECOLOGY	ECOLOGY	ENGLISH	NA	OCT	NA	95	10	NA	NA	NA	2600-2612	WILEY	ENVIRONMENTAL SCIENCES \& ECOLOGY	NA	NA	94	DO FRUGIVORES RESPOND TO FRUIT HARVEST? AN EXPERIMENTAL STUDY OF SHORT-TERM RESPONSES	ARTICLE	1	26	84	ECOLOGY
ISI000187040500002	rejected off topic illegal trade	Ada Sanchez	DONELEY B, 2003, SEMIN AVIAN EXOT PET MED	DONELEY B	GALAH; ROSE BREASTED COCKATOO; BEHAVIOR; NUTRITION; SOCIALIZATION	NA	DONELEY, B (CORRESPONDING AUTHOR), W TOOWOOMBA VET SURG, 194 W ST, TOOWOOMBA, QLD 4350, AUSTRALIA.; W TOOWOOMBA VET SURG, TOOWOOMBA, QLD 4350, AUSTRALIA.	THE GALAH IS THE MOST COMMON AND SUCCESSFUL OF THE AUSTRALIAN COCKATOOS. THE EXPANSION OF AGRICULTURE AND THE ESTABLISHMENT OF PERMANENT WATER SOURCES IN AN OTHERWISE ARID CONTINENT HAS ALLOWED THIS SPECIES TO SPREAD AND THRIVE LIKE NO OTHER AUSTRALIAN PSITTACINE. ALONGSIDE THIS GROWTH THERE HAS BEEN AN INCREASING POPULARITY IN THE GALAH AS A PET AND AVIARY BIRD. IN AUSTRALIA IT IS ONE OF THE MOS…	INDEPENDENCE SQUARE WEST CURTIS CENTER, STE 300, PHILADELPHIA, PA 19106-3399 USA	NA	NA	NA	NA	NA	2020-10-26	751EU	10.1053/S1055-937X(03)00034-3	NA	NA	NA	NA	NA	NA	NA	NA	1055-937X	SEMIN. AVIAN EXOT. PET MED.	SEMINARS IN AVIAN AND EXOTIC PET MEDICINE	ENGLISH	NA	OCT	NA	6	4	NA	NA	NA	185-194	W B SAUNDERS CO	VETERINARY SCIENCES	NA	NA	1	THE GALAH	ARTICLE	1	18	12	VETERINARY SCIENCES
ISI000188054000007	rejected off topic illegal trade	Ada Sanchez	EISERMANN K, 2003, BIRD CONSERV INT	EISERMANN K	NA	NA	EISERMANN, K (CORRESPONDING AUTHOR), POB 098, GUATEMALA CITY, GUATEMALA.; FUNDAC MARIO DARY, GUATEMALA CITY, GUATEMALA.	IN 2001 THE ABUNDANCE OF YELLOW-HEADED PARROT AMAZONA ORATRIX ``GUATEMALENSIS'' AT A ROOST SITE IN PUNTA DE MANABIQUE, GUATEMALA WAS FOUND TO BE 70 INDIVIDUALS. A COMPARISON WITH A ROOST CENSUS IN 1994 SUGGESTED A POPULATION DECLINE. THE LARGEST THREAT TO THIS FORM OF YELLOW-HEADED PARROT IS NEST-ROBBING FOR THE PET TRADE. THE RATE OF DECLINE AND THE LIMITED NUMBER OF INDIVIDUALS LIVING IN THE WI…	40 WEST 20TH ST, NEW YORK, NY 10011-4211 USA	NA	NA	NA	NA	NA	2020-10-26	763CL	10.1017/S0959270903003265	NA	NA	NA	NA	NA	NA	NA	NA	0959-2709	BIRD CONSERV. INT.	BIRD CONSERVATION INTERNATIONAL	ENGLISH	NA	DEC	NA	12	4	BRONZE	EISERMANN, KNUT/0000-0001-8197-4998	NA	361-366	CAMBRIDGE UNIV PRESS	BIODIVERSITY \& CONSERVATION; ZOOLOGY	NA	NA	4	STATUS AND CONSERVATION OF YELLOW-HEADED PARROT AMAZONA ORATRIX ``GUATEMALENSIS'' ON THE ATLANTIC COAST OF GUATEMALA	ARTICLE	0	6	13	BIODIVERSITY CONSERVATION; ORNITHOLOGY
ISI000188120600004	rejected off topic illegal trade	Ada Sanchez	JENSEN T, 2003, ZOO BIOL	JENSEN T;PERNASETTI FM;DURRANT B	MOLECULAR BIRD SEXING; CHD GENE; CHELEX DNA ISOLATION	POLYMERASE-CHAIN-REACTION; IDENTIFICATION; BIRDS; PARROTS; GENE; RATIO;; WILD	JENSEN, T (CORRESPONDING AUTHOR), ZOOL SOC SAN DIEGO, CTR REPROD ENDANGERED SPECIES, POB 120551, SAN DIEGO, CA 92112 USA.; ZOOL SOC SAN DIEGO, CTR REPROD ENDANGERED SPECIES, SAN DIEGO, CA 92112 USA.; UNIV CALIF SAN DIEGO, SAN DIEGO, CA 92103 USA.	THE ABILITY TO RAPIDLY AND RELIABLY DETERMINE THE SEX OF BIRDS IS VERY IMPORTANT FOR SUCCESSFUL CAPTIVE-BIRD BREEDING PROGRAMS, AS WELL AS FOR FIELD RESEARCH. VISUAL INSPECTION OF ADULT BIRDS IS SUFFICIENT FOR SEXUALLY DIMORPHIC SPECIES, BUT NESTLINGS AND MONOMORPHIC SPECIES ARE DIFFICULT, IF NOT IMPOSSIBLE, TO SEX BY SIGHT ONLY. A METHOD FOR RAPID EXTRACTION OF GDNA FROM BLOOD, SHELL-MEMBRANE BL…	DIV JOHN WILEY \& SONS INC, 605 THIRD AVE, NEW YORK, NY 10158-0012 USA	NA	TJENSEN@SANDIEGOZOO.ORG	NA	NA	NA	2020-10-26	763VF	10.1002/zoo.10101	NA	NA	NA	NA	NA	NA	NA	NA	0733-3188	ZOO BIOL.	ZOO BIOLOGY	ENGLISH	NA	NA	NA	25	6	NA	NA	NA	561-571	WILEY-LISS	VETERINARY SCIENCES; ZOOLOGY	NA	NA	70	CONDITIONS FOR RAPID SEX DETERMINATION IN 47 AVIAN SPECIES BY PCR OF GENOMIC DNA FROM BLOOD, SHELL-MEMBRANE BLOOD VESSELS, AND FEATHERS	ARTICLE	0	38	22	VETERINARY SCIENCES; ZOOLOGY
ISI000189274800005	included in review	Ada Sanchez	ANDERSON PK, 2003, SOC ANIM	ANDERSON PK	NA	HUMAN-ANIMAL RELATIONSHIPS; OWNERSHIP; BENEFITS	ANDERSON, PK (CORRESPONDING AUTHOR), WESTERN ILLINOIS UNIV, DEPT SOCIOL \& ANTHROPOL, MACOMB, IL 61455 USA.; WESTERN ILLINOIS UNIV, DEPT SOCIOL \& ANTHROPOL, MACOMB, IL 61455 USA.	ALTHOUGH COMPANION BIRDS ARE THE THIRD MOST-COMMON ANIMAL COMPANION-AFTER DOGS AND CATS-IN U.S. HOUSEHOLDS, FEW ANTHROZOOLOGICAL PUBLICATIONS FOCUS ON THEM. THIS STUDY EXAMINES THE ROLE OF COMPANION PARROTS IN AMERICAN HOUSEHOLDS. THE STUDY COMBINES A LITERATURE REVIEW WITH THE RESULTS OF A SURVEY OF BIRD OWNERS AND PARTICIPANT OBSERVATION. THE STUDY USES THE RESULTING QUALITATIVE AND QUANTITATIV…	PLANTIJNSTRAAT 2, P O BOX 9000, 2300 PA LEIDEN, NETHERLANDS	NA	PK-ANDERSON@WIU.EDU	NA	NA	NA	2020-10-26	779BB	10.1163/156853003322796109	NA	NA	1568-5306	NA	NA	NA	NA	NA	1063-1119	SOC. ANIM.	SOCIETY \& ANIMALS	ENGLISH	NA	NA	NA	69	4	NA	NA	NA	393-418	BRILL ACADEMIC PUBLISHERS	SOCIOLOGY; VETERINARY SCIENCES	NA	NA	28	A BIRD IN THE HOUSE: AN ANTHROPOLOGICAL PERSPECTIVE ON COMPANION PARROTS	ARTICLE	2	16	11	SOCIOLOGY; VETERINARY SCIENCES
ISI000189402000030	rejected off topic illegal trade	Ada Sanchez	PLAIR BL, 2001, AZA ANNUAL CONFERENCE PROCEEDINGS 2001	PLAIR BL;BOODOO D;MALOWSKI S;CAMPBELL M;JOHNSTON S;KUCHINSKI K;CRAIG-CLARKE I;LUTCHMEDIAL G;OEHLER D	NA	NA	PLAIR, BL (CORRESPONDING AUTHOR), CINCINNATI ZOO \& BOT GARDEN, CTR CONSERVAT \& RES ENDANGERED WILDLIFE, 3400 VINE ST, CINCINNATI, OH 45220 USA.; CINCINNATI ZOO \& BOT GARDEN, CTR CONSERVAT \& RES ENDANGERED WILDLIFE, CINCINNATI, OH 45220 USA.	BLUE-AND-GOLD MACAWS (ARA ARARAUNA), ONCE FOUND IN THE NARIVA SWAMP IN TRINIDAD, WERE EXTIRPATED IN THE 1960'S BECAUSE OF NEST POACHING FOR THE PET TRADE AND HABITAT ALTERATION. IN 1993, THE FORESTRY DIVISION OF TRINIDAD AND TOBAGO, THE CENTRE FOR THE RESCUE OF ENDANGERED SPECIES OF TRINIDAD AND TOBAGO (CRESTT) AND THE CINCINNATI ZOO AND BOTANICAL GARDEN EMBARKED ON A MISSION TO RESTORE THIS SPEC…	8403 COLESVILLE RD, SUITE 710, SILVER SPRING, MD 20910 USA	NA	NA	NA	AZA AZA	AZA ANNUAL CONFERENCE PROCEEDINGS 2001	2020-10-26	BY53H	NA	NA	NA	NA	NA	NA	NA	NA	NA	NA	AZA ANNUAL CONFERENCE PROCEEDINGS 2001	AZA ANNUAL CONFERENCE PROCEEDINGS 2001	ENGLISH	NA	NA	ANNUAL CONFERENCE OF THE AMERICAN-ZOO-AND-AQUARIUM-ASSOCIATION, ST LOUIS, MO, SEP 07-11, 2001	9	NA	NA	NA	AMER ZOO AQUARIUM ASSOC	195-202	AMER ZOO \& AQUARIUM ASSOC (AZA)	BIODIVERSITY \& CONSERVATION; ZOOLOGY	NA	NA	0	REINTRODUCTION OF BLUE-AND-GOLD MACAWS TO TRINIDAD	PROCEEDINGS PAPER	0	8	NA	BIODIVERSITY CONSERVATION; ZOOLOGY
ISI000207170500006	rejected off topic illegal trade	JRFP	HEMSWORTH S, 2006, EUR J ONCOL NURS	HEMSWORTH S;PIZER B	ANIMALS-DOMESTIC; ZOONOSES; ANIMALS; IMMUNOCOMPROMISED-HOST; DISEASE;; RISK	INFECTION; CAT; EXPOSURE; PEOPLE; DOGS; RISK	HEMSWORTH, S (CORRESPONDING AUTHOR), ROYAL LIVERPOOL CHILDRENS NHS TRUST, ONCOL UNIT, EATON RD, LIVERPOOL, MERSEYSIDE, ENGLAND.; HEMSWORTH, S.; PIZER, B., ROYAL LIVERPOOL CHILDRENS NHS TRUST, ONCOL UNIT, LIVERPOOL, MERSEYSIDE, ENGLAND.	PET OWNERSHIP HAS BEEN ASSOCIATED WITH BOTH EMOTIONAL AND PHYSICAL HEALTH BENEFITS. HOWEVER, OWNING PETS MAY ALSO POSE HEALTH RISKS TO IMMUNOCOMPROMISED PATIENTS THROUGH ZOONOTIC TRANSMISSION OF DISEASE. OUR INITIAL IMPRESSION WAS THAT THERE IS A LACK OF ANY EVIDENCE BASE IN INFORMATION GIVEN BY HEALTH CARE PROFESSIONALS REGARDING THESE RISKS. WE THEREFORE AIMED TO PRODUCE EVIDENCE-BASED GUIDELIN…	THE BOULEVARD, LANGFORD LANE, KIDLINGTON, OXFORD OX5 1GB, OXON, ENGLAND	NA	SUE.HEMSWORTH@RLC.NHS.UK	NA	NA	NA	2020-10-26	V06CA	10.1016/j.ejon.2005.08.001	NA	NA	1532-2122	NA	NA	NA	NA	NA	1462-3889	EUR. J. ONCOL. NURS.	EUROPEAN JOURNAL OF ONCOLOGY NURSING	ENGLISH	NA	APR	NA	29	2	NA	NA	NA	117-127	ELSEVIER SCI LTD	ONCOLOGY; NURSING	NA	NA	49	PET OWNERSHIP IN IMMUNOCOMPROMISED CHILDREN-A REVIEW OF THE LITERATURE AND SURVEY OF EXISTING GUIDELINES	ARTICLE	1	15	10	ONCOLOGY; NURSING
ISI000208353800005	rejected illegal trade circunstancial	Ada Sanchez	ONOFRI SAIKI PT, 2009, REV BRAS ORNITOL	ONOFRI SAIKI PT;ESTEVINHO GUIDO AM	ETHNO-ORNITHOLOGY; PSITTACIDAE; LOCAL KNOWLEDGE; RURAL DISTRICTS;; CONSERVATION STRATEGIES	PARROT; CALL	SAIKI, PTO (CORRESPONDING AUTHOR), UNIV FED UBERLANDIA, INST BIOL, CAIXA POSTAL 593, BR-38400902 UBERLANDIA, MG, BRAZIL.; ONOFRI SAIKI, PATRICIA THIEME; ESTEVINHO GUIDO, LUCIA DE FATIMA; DE OLIVEIRA CUNHA, ANA MARIA, UNIV FED UBERLANDIA, INST BIOL, BR-38400902 UBERLANDIA, MG, BRAZIL.	ETHNO-ECOLOGY, ETHNO-TAXONOMY AND CULTURAL VALUE OF PSITTACIDAE IN RURAL DISTRICTS OF THE TRIANGULO MINEIRO REGION, BRAZIL. STUDIES IN ETHNO-BIOLOGY SEARCH TO UNDERSTAND THE KNOWLEDGE OF LOCAL POPULATIONS ABOUT THE ENVIRONMENT AS STARTING POINT FOR THE SUCCESS OF CONSERVATION STRATEGIES. RESEARCHES IN ETHNO-ORNITHOLOGY FIELD ARE STILL INCIPIENT IN THE TRIANGULO MINEIRO REGION. THIS RESEARCH INVES…	C/O ROMULO RIBON, MUSEU ZOOLOGIA JOAO MOOJEN, LADEIRA DOS OPERARIOS 54-204, VICOSA, MG 36570-000, BRAZIL	NA	PATRICIATHIEME@YAHOO.COM.BR	NA	NA	NA	2020-10-23	V23PD	NA	NA	NA	NA	NA	NA	NA	NA	NA	0103-5657	REV. BRAS. ORNITOL.	REVISTA BRASILEIRA DE ORNITOLOGIA	PORTUGUESE	NA	MAR	NA	47	1	NA	NA	NA	41-52	SOC BRASILEIRA ORNITOLOGIA	ZOOLOGY	NA	NA	3	ETHNO-ECOLOGY, ETHNO-TAXONOMY AND CULTURAL VALUE OF PSITTACIDAE IN RURAL DISTRICTS OF THE TRIANGULO MINEIRO REGION, BRAZIL.	ARTICLE	3	11	17	ORNITHOLOGY
ISI000209016000006	rejected off topic illegal trade	Ada Sanchez	JUST CL, 2000, INT J PHYTOREMEDIAT	JUST CL;SCHNOOR JL	RDX; PHYTOREMEDIATION; ULTRAFILTRATION	ADVANCED OXIDATION PROCESSES; HEXAHYDRO-1;3;5-TRINITRO-1;3;5-TRIAZINE; RDX; MICROBIAL TRANSFORMATION; 2;4;6-TRINITROTOLUENE; TNT; DEGRADATION;; REDUCTION; KINETICS; FATE; SOIL	JUST, CL (CORRESPONDING AUTHOR), UNIV IOWA, DEPT CIVIL \& ENVIRONM ENGN, IOWA CITY, IA 52242 USA.; JUST, CRAIG L.; SCHNOOR, JERALD L., UNIV IOWA, DEPT CIVIL \& ENVIRONM ENGN, IOWA CITY, IA 52242 USA.	A PREPARATION TECHNIQUE FOR ANALYSIS OF EXPLOSIVES COMPOUNDS IN PLANT TISSUE HAS BEEN DEVELOPED. THE TECHNIQUE UTILIZES ACETONE EXTRACTION FOLLOWED BY ULTRAFILTRATION CLEAN UP. ULTRAFILTRATION REMOVES THE LARGE QUANTITIES OF CHLOROPHYLL AND POLAR ORGANICS THAT INTERFERE WITH UV/VIS DETECTION USED IN HIGH-PERFORMANCE LIQUID CHROMATOGRAPHY. THE PROCEDURE WAS TESTED WITH 14 EXPLOSIVES-RELATED COMPOU…	530 WALNUT STREET, STE 850, PHILADELPHIA, PA 19106 USA	NA	NA	NA	NA	NA	2020-10-26	V33JV	10.1080/15226510009359036	NA	NA	1549-7879	NA	NA	NA	NA	NA	1522-6514	INT. J. PHYTOREMEDIAT.	INTERNATIONAL JOURNAL OF PHYTOREMEDIATION	ENGLISH	NA	NA	NA	38	3	NA	NA	NA	255-267	TAYLOR \& FRANCIS INC	ENVIRONMENTAL SCIENCES \& ECOLOGY	JUST, CRAIG L/J-4207-2012 SCHNOOR, JERALD L/B-1951-2008	NA	5	A PREPARATION TECHNIQUE FOR ANALYSIS OF EXPLOSIVES IN PLANT TISSUES	ARTICLE	0	5	2	ENVIRONMENTAL SCIENCES
ISI000209214700010	rejected off topic parrots	Ada Sanchez	CHEN EC, 2011, J VIS EXP	CHEN EC;MILLER SA;DERISI JL;CHIU CY	IMMUNOLOGY; ISSUE 50; VIRUS; MICROARRAY; VIROCHIP; VIRAL DETECTION;; GENOMICS; CLINICAL DIAGNOSTICS; VIRAL DISCOVERY; METAGENOMICS; NOVEL; PATHOGEN DISCOVERY	NA	CHIU, CY (CORRESPONDING AUTHOR), UNIV CALIF SAN FRANCISCO, DEPT LAB MED, SAN FRANCISCO, CA 94143 USA.; CHEN, EUNICE C.; MILLER, STEVE A.; DERISI, JOSEPH L.; CHIU, CHARLES Y., UNIV CALIF SAN FRANCISCO, DEPT LAB MED, SAN FRANCISCO, CA 94143 USA.; DERISI, JOSEPH L.; CHIU, CHARLES Y., UNIV CALIF SAN FRANCISCO, DIV INFECT DIS, SAN FRANCISCO, CA 94143 USA.	THE DIAGNOSIS OF VIRAL CAUSES OF MANY INFECTIOUS DISEASES IS DIFFICULT DUE TO THE INHERENT SEQUENCE DIVERSITY OF VIRUSES AS WELL AS THE ONGOING EMERGENCE OF NOVEL VIRAL PATHOGENS, SUCH AS SARS CORONAVIRUS AND 2009 PANDEMIC H1N1 INFLUENZA VIRUS, THAT ARE NOT DETECTABLE BY TRADITIONAL METHODS. TO ADDRESS THESE CHALLENGES, WE HAVE PREVIOUSLY DEVELOPED AND VALIDATED A PAN-VIRAL MICROARRAY PLATFORM CA…	1 ALEWIFE CENTER, STE 200, CAMBRIDGE, MA 02140 USA	E2536	CHARLES.CHIU@UCSF.EDU	NA	NA	NA	2020-10-23	V36LZ	10.3791/2536	NA	NA	NA	NA	NA	NIH K08 GRANT; ABBOTT DISCOVERY AWARD; HOWARD HUGHES MEDICAL INSTITUTEHOWARD HUGHES MEDICAL INSTITUTE	WE THANK DAVID WANG, ANATOLY URISMAN, AMY KISTLER, KAEL FISCHER, PATRICK TANG, AND ALEXANDER GRENINGER FOR THE INITIAL DEVELOPMENT AND OPTIMIZATION OF THE VIROCHIP PROTOCOL. THIS WORK IS SUPPORTED BY AN NIH K08 GRANT AND ABBOTT DISCOVERY AWARD (TO CC) AND THE HOWARD HUGHES MEDICAL INSTITUTE (TO JLD).	NA	1940-087X	J. VIS. EXP.	JOVE-JOURNAL OF VISUALIZED EXPERIMENTS	ENGLISH	NA	APR	NA	11	50	BRONZE, GREEN PUBLISHED	CHIU, CHARLES/0000-0003-2915-2094	NA	NA	JOURNAL OF VISUALIZED EXPERIMENTS	SCIENCE \& TECHNOLOGY - OTHER TOPICS	NA	NA	54	USING A PAN-VIRAL MICROARRAY ASSAY (VIROCHIP) TO SCREEN CLINICAL SAMPLES FOR VIRAL PATHOGENS	ARTICLE	1	3	NA	MULTIDISCIPLINARY SCIENCES
ISI000212612600003	included in review	Ada Sanchez	PIRES SF, 2012, GLOB CRIME	PIRES SF	PARROT POACHING; ILLEGAL WILDLIFE TRADE; CRIME PREVENTION; CRAVED;; ITINERANT FENCES	NESTING SUCCESS; SOUTH-AFRICA; CONSERVATION; PROTECTION; IMPACT	PIRES, SF (CORRESPONDING AUTHOR), FLORIDA INT UNIV, DEPT CRIMINAL JUSTICE, MIAMI, FL 33199 USA.; PIRES, STEPHEN F., FLORIDA INT UNIV, DEPT CRIMINAL JUSTICE, MIAMI, FL 33199 USA.	PARROTS ARE AMONGST THE MOST BEAUTIFUL AND INTELLIGENT BIRD SPECIES IN THE WORLD. THEY HAVE BEEN COVETED AS PETS FOR CENTURIES, PARTICULARLY IN THE NEO-TROPICS WHERE THEY ARE HEAVILY POPULATED. UNFORTUNATELY, THIS HAS LED TO DRAMATIC INCREASES IN PARROT POACHING OVER THE LAST FEW DECADES, MAKING PARROTS THE MOST THREATENED BIRD SPECIES IN THE WORLD. DESPITE LAWS AGAINST PARROT POACHING THROUGHOUT…	2-4 PARK SQUARE, MILTON PARK, ABINGDON OX14 4RN, OXON, ENGLAND	NA	SFPIRES@FIU.EDU	NA	NA	NA	2020-10-23	V86UH	10.1080/17440572.2012.700180	NA	NA	1744-0580	NA	NA	NA	NA	NA	1744-0572	GLOB. CRIME	GLOBAL CRIME	ENGLISH	NA	NA	NA	47	3	NA	PIRES, STEPHEN/0000-0002-8525-0185	NA	176-190	ROUTLEDGE JOURNALS, TAYLOR \& FRANCIS LTD	CRIMINOLOGY \& PENOLOGY	NA	NA	52	THE ILLEGAL PARROT TRADE: A LITERATURE REVIEW	REVIEW	0	3	13	CRIMINOLOGY \& PENOLOGY
ISI000214849800067	rejected off topic illegal trade	Ada Sanchez	FITCH WT, 2013, FRONT SYST NEUROSCI	FITCH WT	RHYTHM; METER; MUSIC COGNITION; COGNITIVE BIOLOGY; COMPARATIVE; COGNITION; HIERARCHY	BUDGERIGARS MELOPSITTACUS-UNDULATUS; MUSICAL RHYTHM; LANGUAGE; DISCRIMINATION; LINGUISTIC RHYTHM; BEAT PERCEPTION; SPEECH RHYTHM;; HARBOR SEALS; BROCAS AREA; SYNCHRONIZATION; EVOLUTION	FITCH, WT (CORRESPONDING AUTHOR), UNIV VIENNA, DEPT COGNIT BIOL, 14 ALTHANSTR, A-1090 VIENNA, AUSTRIA.; FITCH, W. TECUMSEH, UNIV VIENNA, SCH LIFE SCI, DEPT COGNIT BIOL, VIENNA, AUSTRIA.	THIS PAPER OUTLINES A COGNITIVE AND COMPARATIVE PERSPECTIVE ON HUMAN RHYTHMIC COGNITION THAT EMPHASIZES A KEY DISTINCTION BETWEEN PULSE PERCEPTION AND METER PERCEPTION. PULSE PERCEPTION INVOLVES THE EXTRACTION OF A REGULAR PULSE OR ``TACTUS'' FROM A STREAM OF EVENTS. METER PERCEPTION INVOLVES GROUPING OF EVENTS INTO HIERARCHICAL TREES WITH DIFFERING LEVELS OF ``STRENGTH'' OR PERCEPTUAL PROMINENCE…	AVENUE DU TRIBUNAL FEDERAL 34, LAUSANNE, CH-1015, SWITZERLAND	8	TECUMSEH.FITCH@UNIVIE.AC.AT	NA	NA	NA	2020-10-23	V19WT	10.3389/fnsys.2013.00068	NA	NA	1662-5137	NA	NA	EUROPEAN RESEARCH COUNCIL ADVANCED GRANTEUROPEAN RESEARCH COUNCIL (ERC) [230604]	I THANK DANIEL BOWLING, BRUNO GINGRAS, MARISA HOESCHELE, HENKJAN HONING, ROBERT LADD, JUSTIN LONDON, FRED LERDAHL, BJORN MERKER, ANIRUDDH PATEL, ANDREW SCHLOSS, AND DAVID TEMPERLEY FOR VERY HELPFUL COMMENTS AND DISCUSSIONS, NADJA KAVCIK FOR FIGURE 5, AND THREE REVIEWERS FOR CONSTRUCTIVE CRITICISM. THIS WORK WAS SUPPORTED BY EUROPEAN RESEARCH COUNCIL ADVANCED GRANT NO. 230604 ``SOMACCA.''	NA	NA	FRONT. SYST. NEUROSCI.	FRONTIERS IN SYSTEMS NEUROSCIENCE	ENGLISH	NA	NA	NA	142	NA	DOAJ GOLD, GREEN PUBLISHED	NA	NA	NA	FRONTIERS MEDIA SA	NEUROSCIENCES \& NEUROLOGY	NA	NA	81	RHYTHMIC COGNITION IN HUMANS AND ANIMALS: DISTINGUISHING METER AND PULSE PERCEPTION	ARTICLE	1	10	7	NEUROSCIENCES
ISI000215232700002	rejected off topic illegal trade	Ada Sanchez	DELIGNE E, 2012, J COMPUT VIROL HACKING TECH	DELIGNE E	NA	NA	DELIGNE, E (CORRESPONDING AUTHOR), ESIEA OUEST, DCNS, POLYTECH, TOULON, FRANCE.; DELIGNE, EDDY, ESIEA OUEST, DCNS, POLYTECH, TOULON, FRANCE.	A DRONE IS A MACHINE WHICH FUNCTIONS EITHER BY THE REMOTE CONTROL OF A NAVIGATOR OR PILOT OR AUTONOMOUSLY, THAT IS, AS A SELF-DIRECTING ENTITY. THEIR LARGEST USE IS WITHIN MILITARY APPLICATIONS. THIS MACHINES ARE SMALLER THAN PILOTED VEHICLE AND SO ARE LESS VISIBLE OR INVISIBLE (FURTIVE). THE GOAL OF OUR STUDY IS TO SHOW, ON A COMMERCIAL DRONE, THE EFFECT OF THEMINIATURIZATION. WE USE THE ARDRONE…	22 RUE DE PALESTRO, PARIS, 75002, FRANCE	NA	EDDY.DELIGNE@GMAIL.COM	NA	NA	NA	2020-10-23	V25OA	10.1007/s11416-011-0158-4	NA	NA	2263-8733	NA	NA	NA	NA	NA	2274-2042	J. COMPUT. VIROL. HACKING TECH.	JOURNAL IN COMPUTER VIROLOGY AND HACKING TECHNIQUES	ENGLISH	NA	MAY	NA	2	12	NA	NA	NA	15-27	SPRINGER FRANCE	COMPUTER SCIENCE	NA	NA	5	ARDRONE CORRUPTION	ARTICLE	0	0	8	COMPUTER SCIENCE, INFORMATION SYSTEMS
ISI000215293500006	included in review	Ada Sanchez	ROLDAN-CLARA B, 2014, ETHNOBIOL CONSERV	ROLDAN-CLARA B;LOPEZ-MEDELLIN X;ESPEJEL E	BIRD TRADE; BIRD USE; ETHNOORNITHOLOGY; PARROTS; WILDLIFE	WILD BIRDS; ILLEGAL TRADE; CONSERVATION; BRAZIL; CAATINGA; PARROTS	ROLDAN-CLARA, B (CORRESPONDING AUTHOR), UABC, CARRETERA TRANSPENINSULAR ENSENADA,TIJUANA 3917, ENSENADA 22860, BAJA CALIFORNIA, MEXICO.; ROLDAN-CLARA, BLANCA; ESPEJEL, ILEANA; ARELLANO, EVARISTA, UABC, CARRETERA TRANSPENINSULAR ENSENADA,TIJUANA 3917, ENSENADA 22860, BAJA CALIFORNIA, MEXICO.; LOPEZ-MEDELLIN, XAVIER, UNIV AUTONOMA ESTADO MORELOS, CTR INVEST BIODIVERSIDAD \& CONSERVAC, CUERNAVACA 62…	A LARGE AMOUNT OF BIRDS ARE HARVESTED FROM THE NATURAL ENVIRONMENT FOR THE PET MARKET. THIS TRADE IS A CONSERVATION ISSUE AND AN ECONOMIC INCOME FOR MANY PEOPLE. THOUGH BIRD TRADE IS COMMON IN LATIN AMERICA THERE ARE FEW PUBLISHED STUDIES. THEREFORE, WE REVIEWED AVAILABLE LITERATURE TO UNDERSTAND THE BACKGROUND OF THIS TOPIC AND TO IDENTIFY FUTURE RELEVANT RESEARCH TOPICS. WE COLLECTED, SUMMARIZE…	AV DAS BARAUNAS, 351 COMPLEXO ADMINISTRATIVO, CAMPUS UNIVERSITARIO, BODOCONGO, CAMPINA GRANDE, PARAIBA 58109-753, BRAZIL	UNSP 5	BLANCAMAR@GMAIL.COM	NA	NA	NA	2020-10-23	V26LK	10.15451/ec2014-10-3.5-1-18	NA	NA	NA	NA	NA	CONSEJO NACIONAL DE CIENCIA Y TECNOLOGIA (CONACYT)CONSEJO NACIONAL DE CIENCIA Y TECNOLOGIA (CONACYT)	WE THANK THE COLLABORATION AND THE SEVERAL ADVISE COMING FROM MEXICAN ORNITHOLOGIST FROM YAHOO GROUPS' ORNITOLOGICA DE MEXICO AND SOCIEDAD PARA EL ESTUDIO Y CONSERVACION DE LAS AVES EN MEXICO A.C. (CIPAMEX). CONSEJO NACIONAL DE CIENCIA Y TECNOLOGIA (CONACYT) PROVIDED FUNDING FOR THIS WORK. THANKS ARE ALSO OWED TO TWO ANONYMOUS REVIEWERS FOR HELPFUL SUGGESTIONS AND COMMENTS.	NA	2238-4782	ETHNOBIOL. CONSERV.	ETHNOBIOLOGY AND CONSERVATION	ENGLISH	NA	NA	NA	77	NA	BRONZE	ARELLANO-GARCIA, MARIA EVARISTA/0000-0002-0997-6902	NA	NA	UNIV ESTADUAL PARAIBA, EDITORA-EDUEP	BIODIVERSITY \& CONSERVATION	ARELLANO-GARCIA, MARIA EVARISTA/B-8084-2014 MEDELLIN, XAVIER LOPEZ/AAF-8469-2020	NA	16	LITERATURE REVIEW OF THE USE OF BIRDS AS PETS IN LATIN-AMERICA, WITH A DETAILED PERSPECTIVE ON MEXICO	REVIEW	0	0	3	BIODIVERSITY CONSERVATION
ISI000220369900005	rejected off topic illegal trade	Ada Sanchez	FILIPPICH LJ, 2004, SEMIN AVIAN EXOT PET MED	FILIPPICH LJ	NEOPLASIA; PREVALENCE; AVIAN; TUMOR CONTROL; CHEMOTHERAPY; RADIOTHERAPY	SQUAMOUS-CELL CARCINOMA; MACAW ARA-ARARAUNA; LOVEBIRD; AGAPORNIS-ROSEICOLLIS; COCKATOO CACATUA-MOLUCCENSIS; WHOLE-BODY; HYPERTHERMIA; PARROT AMAZONA-AESTIVA; PHOTODYNAMIC THERAPY; INTRATUMORAL; CHEMOTHERAPY; PLATINUM PHARMACOKINETICS; DERMATOLOGICAL DISEASES	FILIPPICH, LJ (CORRESPONDING AUTHOR), UNIV QUEENSLAND, SCH VET SCI, BRISBANE, QLD 4072, AUSTRALIA.; UNIV QUEENSLAND, SCH VET SCI, BRISBANE, QLD 4072, AUSTRALIA.	NEOPLASIA IS COMMON IN PET BIRDS, ESPECIALLY PSITTACINES, AND MAINLY INVOLVES THE INTEGUMENT AND UROGENITAL SYSTEM. BEFORE TREATMENT OPTIONS ARE CONSIDERED, A DEFINITIVE DIAGNOSIS SHOULD BE MADE AND THE EXTENT OF THE DISEASE DETERMINED. TREATMENT SHOULD INITIALLY BE DIRECTED AT TUMOR ERADICATION AND MAY INVOLVE USING SEVERAL MODALITIES TOGETHER OR SEQUENTIALLY. SURGERY, RADIOTHERAPY, AND PHOTODYN…	INDEPENDENCE SQUARE WEST CURTIS CENTER, STE 300, PHILADELPHIA, PA 19106-3399 USA	NA	NA	NA	NA	NA	2020-10-26	805MH	10.1053/S1055-937X(03)00055-0	NA	NA	NA	NA	NA	NA	NA	NA	1055-937X	SEMIN. AVIAN EXOT. PET MED.	SEMINARS IN AVIAN AND EXOTIC PET MEDICINE	ENGLISH	NA	JAN	NA	165	1	NA	NA	NA	25-43	W B SAUNDERS CO	VETERINARY SCIENCES	NA	NA	37	TUMOR CONTROL IN BIRDS	REVIEW	0	20	13	VETERINARY SCIENCES
ISI000220699700009	rejected off topic parrots	JRFP	MEDINA VF, 2004, CHEMOSPHERE	MEDINA VF;LARSON SL;AGWARAMGBO L;PEREZ W;ESCALON L	PHYTOREMEDIATION; TRINITROTOLUENE; PLANT EXTRACTS	FERREDOXIN NADP OXIDOREDUCTASE; FUNGUS PAXILLUS-INVOLUTUS; NITRATE; REDUCTASE; SPINACH; WATER; TRANSFORMATION; BACTERIA;; 2;4;6-TRINITROTOLUENE; DISINFECTION; PURIFICATION	MEDINA, VF (CORRESPONDING AUTHOR), USA, CORPS ENGINEERS, ERDC, ENVIRONM ENGN BRANCH,EPE,ENVIRONM LAB, 3909 HALLS FERRY RD, VICKSBURG, MS 39180 USA.; USA, CORPS ENGINEERS, ERDC, ENVIRONM ENGN BRANCH,EPE,ENVIRONM LAB, VICKSBURG, MS 39180 USA.; DILLARD UNIV, DEPT CHEM, NEW ORLEANS, LA 70122 USA.; PURDUE UNIV, DEPT CHEM, W LAFAYETTE, IN 47907 USA.; ANALYT SERV INC, VICKSBURG, MS 39180 USA.	D=CRUDE PLANT EXTRACT SOLUTIONS (SPINACH AND PARROTFEATHER) WERE PREPARED AND SPIKED WITH 2,4,6-TRINITROTOLUENE (TNT) (20 MG 1(-1)). 90-H TNT REMOVAL BY THESE SOLUTIONS WAS COMPARED TO CONTROLS. SPINACH AND PARROTFEATHER EXTRACT SOLUTIONS REMOVED 99\% AND 50\% OF THE INITIAL TNT, RESPECTIVELY; TNT WAS NOT ELIMINATED IN THE CONTROLS OR IN EXTRACT SOLUTIONS WHERE REMOVAL ACTIVITY WAS DEACTIVATED BY…	THE BOULEVARD, LANGFORD LANE, KIDLINGTON, OXFORD OX5 1GB, ENGLAND	NA	VICTOR.F.MEDINA@ERDC.USACE.ARMY.MIL	NA	NA	NA	2020-10-26	810JD	10.1016/j.chemosphere.2003.12.014	NA	NA	NA	NA	NA	NA	NA	NA	0045-6535	CHEMOSPHERE	CHEMOSPHERE	ENGLISH	NA	MAY	NA	36	5	NA	NA	NA	725-732	PERGAMON-ELSEVIER SCIENCE LTD	ENVIRONMENTAL SCIENCES \& ECOLOGY	NA	NA	8	TREATMENT OF TRINITROTOLUENE BY CRUDE PLANT EXTRACTS	ARTICLE	0	8	55	ENVIRONMENTAL SCIENCES
ISI000220790100031	rejected off topic illegal trade	Ada Sanchez	PEPPERBERG IM, 2004, ANIM WELF	PEPPERBERG IM	ANIMAL-HUMAN COMMUNICATION; ANIMAL WELFARE; AVIAN INTELLIGENCE;; COMPANION ANIMALS; COMPUTER-BASED ENRICHMENT; GREY PARROT	PSITTACUS-ERITHACUS; IMITATION	PEPPERBERG, IM (CORRESPONDING AUTHOR), MIT, SCH ARCHITECTURE \& PLANNING, BLDG 7-231,77 MASSACHUSETTS AVE, CAMBRIDGE, MA 02139 USA.; MIT, SCH ARCHITECTURE \& PLANNING, CAMBRIDGE, MA 02139 USA.; BRANDEIS UNIV, DEPT PSYCHOL, WALTHAM, MA 02454 USA.	MUCH OF MY RESEARCH HAS BEEN DEVOTED TO DETERMINING THE COGNITIVE AND COMMUNICATIVE ABILITIES OF GREY PARROTS (PSITTACUS ERITHACUS), BUT OTHER COMPANION ANIMALS AND THOSE IN CAPTIVITY IN ZOOS ALSO HAVE CONSIDERABLE CAPACITIES THAT ARE OFTEN UNDER-UTILISED IN SUCH SETTINGS. MANY SUCH ANIMALS ARE LEFT TO THEIR OWN DEVICES FOR LARGE PARTS OF THE DAY, THEIR BOREDOM MAY TRANSLATE INTO UNSUITABLE BEHAV…	OLD SCHOOL, BREWHOUSE HILL, WHEATHAMPSTEAD AL4 8AN, HERTS, ENGLAND	NA	IMPEPPER@MEDIA.MIT.EDU	NA	NA	NA	2020-10-26	811RX	NA	NA	NA	NA	NA	NA	NA	NA	NA	0962-7286	ANIM. WELF.	ANIMAL WELFARE	ENGLISH	NA	FEB	UFAW INTERNATIONAL SYMPOSIUM ON SCIENCE IN THE SERVICE OF ANIMAL WELFARE, EDINBURGH, SCOTLAND, APR 02-04, 2003	39	NA	NA	GHORBANIZADEH, FATEMEH/0000-0001-8791-9498	UNIV FEDERAT ANIM WELFARE	S203-S208	UNIV FEDERATION ANIMAL WELFARE	VETERINARY SCIENCES; ZOOLOGY	GHORBANIZADEH, FATEMEH/S-6844-2017	NA	8	COGNITIVE AND COMMUNICATIVE CAPACITIES OF GREY PARROTS - IMPLICATIONS FOR THE ENRICHMENT OF MANY SPECIES	ARTICLE; PROCEEDINGS PAPER	0	35	13	VETERINARY SCIENCES; ZOOLOGY
ISI000221045500004	rejected overview	Ada Sanchez	FALCON MD, 2004, SEMIN AVIAN EXOT PET MED	FALCON MD	PARROT; POULTRY; EXOTIC NEWCASTLE DISEASE; AVIAN PARAMYXOVIRUS-1	BIRDS; PET	FALCON, MD (CORRESPONDING AUTHOR), 11405 STARKEY RD, LARGO, FL 33773 USA.	EXOTIC NEWCASTLE DISEASE (END) IS A VIRULENT STRAIN OF AVIAN PARAMYXOVIRUS-1. THIS VIRUS HAS DEVASTATED THE POULTRY INDUSTRY IN MANY COUNTRIES. AS A RESULT, STRICT INTERNATIONAL REGULATIONS ARE IN PLACE TO CONTROL THE MOVEMENT OF EXOTIC BIRDS, POULTRY, AND POULTRY PRODUCTS TO PREVENT THE INTRODUCTION OF THIS DISEASE INTO COUNTRIES WHERE IT HAS BEEN ERADICATED. WHEN END IS INTRODUCED TO A NAIVE, U…	INDEPENDENCE SQUARE WEST CURTIS CENTER, STE 300, PHILADELPHIA, PA 19106-3399 USA	NA	NA	NA	NA	NA	2020-10-26	815MD	10.1053/j.saep.2004.01.003	NA	NA	NA	NA	NA	NA	NA	NA	1055-937X	SEMIN. AVIAN EXOT. PET MED.	SEMINARS IN AVIAN AND EXOTIC PET MEDICINE	ENGLISH	NA	APR	NA	26	2	NA	NA	NA	79-85	W B SAUNDERS CO	VETERINARY SCIENCES	NA	NA	7	EXOTIC NEWCASTLE DISEASE	ARTICLE	0	5	13	VETERINARY SCIENCES
ISI000221425000017	included in review	Ada Sanchez	RASO TD, 2004, J ZOO WILDL MED	RASO TD;GODOY SN;MILANELO L;DE SOUZA CAI;MATUSCHIMA ER;ARAUJO JP;PINTO AA	BLUE-FRONTED AMAZON PARROT; AMAZONA AESTIVA; CHLAMYDIOSIS; CHLAMYDOPHILA; PSITTACI; BRAZIL	PSITTACI INFECTION; BIRDS; PATHOGENESIS	PINTO, AA (CORRESPONDING AUTHOR), UNESP, FAC CIENCIAS AGR \& VET, DEPT PATOL VET, BR-14884900 JABOTICABAL, SP, BRAZIL.; UNESP, FAC CIENCIAS AGR \& VET, DEPT PATOL VET, BR-14884900 JABOTICABAL, SP, BRAZIL.; UNIV SAO PAULO, FAC MED VET, DEPT PATOL, BR-05508 SAO PAULO, BRAZIL.; PARQUE ECOLE TIETE, BR-05508 SAO PAULO, BRAZIL.; UNIV ESTADUAL PAULISTA JULIO MESQUITA FILHO, INST BIOCIENCIAS, DEPT MICROB…	FIFTY-EIGHT BLUE-FRONTED AMAZON PARROT (AMAZONA AESTIVA) NESTLINGS, RECOVERED FROM THE ILLEGAL TRADE, BECAME ILL AT A WILDLIFE REHABILITATION CENTER IN S (A) OVER TILDEO PAULO STATE, BRAZIL. CLINICAL SIGNS OBSERVED WERE NONSPECIFIC, AND THE MORTALITY RATE WAS 96.5\% DESPITE INITIAL TREATMENT WITH NORFLOXACIN. POSTMORTEM EXAMINATIONS WERE PERFORMED ON 10 BIRDS. LIVER AND SPLEEN SMEARS SHOWED STRUC…	6 NORTH PENNELL ROAD, MEDIA, PA 19063 USA	NA	NA	NA	NA	NA	2020-10-26	820YD	NA	NA	NA	NA	NA	NA	NA	NA	NA	1042-7260	J. ZOO WILDL. MED.	JOURNAL OF ZOO AND WILDLIFE MEDICINE	ENGLISH	NA	MAR	NA	15	1	NA	ARAUJO, JOAO PESSOA/0000-0002-9153-1485 ARAUJO, JP/0000-0002-9153-1485 NERI GODOY, SILVIA/0000-0002-0914-2959 PINTO, ARAMIS AUGUSTO/0000-0003-2906-0405 RASO, TANIA FREITAS/0000-0002-1572-5026	NA	94-96	AMER ASSOC ZOO VETERINARIANS	VETERINARY SCIENCES	ARAUJO, JOAO PESSOA/C-2444-2012 ARAUJO, JP/Q-3043-2019 NERI GODOY, SILVIA/B-4631-2015 PINTO, ARAMIS AUGUSTO/G-5777-2012 RASO, TANIA FREITAS/I-2571-2012	NA	18	AN OUTBREAK OF CHLAMYDIOSIS IN CAPTIVE BLUE-FRONTED AMAZON PARROTS (AMAZONA AESTIVA) IN BRAZIL	ARTICLE	0	5	35	VETERINARY SCIENCES
ISI000221802500002	rejected off topic illegal trade	Ada Sanchez	SPEER BL, 2004, PROCEEDINGS OF THE 25TH ANNUAL CONFERENCE ON AVIAN MEDICINE AND SURGERY-a	SPEER BL	NA	STRESS	SPEER, BL (CORRESPONDING AUTHOR), MED CTR BIRDS, OAKLEY, CA 94561 USA.; MED CTR BIRDS, OAKLEY, CA 94561 USA.	PSITTACINE BEHAVIORAL DISORDERS ARE COMMONLY ENCOUNTERED IN VETERINARY PRACTICES, BUT MORE FREQUENTLY ARE NOT RECOGNIZED OR ADDRESSED AS COMPARED TO INFECTIOUS DISEASE IN DAILY CLINICAL PRACTICE. PET PARROT BEHAVIORS ORIGINATE FROM THOSE OF THEIR WILD COUNTERPARTS, WITH INSTINCTIVE SIGNALS, DISPLAYS, AND LEARNED BEHAVIORS FROM THEIR WILD COUNTERPARTS. PARROTS IN CAPTIVITY NEED TO EFFECTIVELY ACQU…	MEMORIAL BLDG SUITE 291 610 N MAIN STREET, BLACKSBURG, VA 24060-3349 USA	NA	NA	NA	NA	PROCEEDINGS OF THE 25TH ANNUAL CONFERENCE ON AVIAN MEDICINE AND SURGERY	2020-10-26	BAE36	NA	NA	MARX, KL AND ROSTON, MA	NA	NA	NA	NA	NA	NA	NA	PROCEEDINGS OF THE 25TH ANNUAL CONFERENCE ON AVIAN MEDICINE AND SURGERY	PROCEEDINGS OF THE 25TH ANNUAL CONFERENCE ON AVIAN MEDICINE AND SURGERY	ENGLISH	NA	NA	25TH ANNUAL CONFERENCE ON AVIAN MEDICINE AND SURGERY, WILLIAMSBURG, VA, APR 25-27, 2004	21	NA	NA	NA	MID ATLANTIC STATES ASSOC AVIAN VETERINARIANS	23-33	MID-ATLANTIC STATES ASSOC AVIAN VETERINARIANS	ZOOLOGY; VETERINARY SCIENCES	NA	NA	0	PRACTICAL CLINICAL APPLICATIONS FOR THE EXAM ROOM	PROCEEDINGS PAPER	0	0	NA	ORNITHOLOGY; VETERINARY SCIENCES
ISI000222125700012	rejected off topic illegal trade	JRFP	BUDDEN AE, 2004, BEHAV ECOL	BUDDEN AE;BEISSINGER SR	FORPUS PASSERINUS; GREEN-RUMPED PARROTLET; LAYING INTERVAL; LOCAL; RESOURCE COMPETITION; SEX RATIO	LOCAL RESOURCE COMPETITION; HATCHING ASYNCHRONY; NEOTROPICAL PARROT; NO; EVIDENCE; MANIPULATION; POPULATION; ADJUSTMENT; ALLOCATION; PATERNITY;; BEHAVIOR	BUDDEN, AE (CORRESPONDING AUTHOR), UNIV CALIF BERKELEY, DEPT ENVIRONM SCI POLICY \& MANAGEMENT, ECOSYST SCI DIV, 151 HILGARD HALL NO 3110, BERKELEY, CA 94720 USA.; UNIV CALIF BERKELEY, DEPT ENVIRONM SCI POLICY \& MANAGEMENT, ECOSYST SCI DIV, BERKELEY, CA 94720 USA.	WE INVESTIGATED NESTLING SEX RATIO VARIATION IN THE GREEN-RUMPED PARROTLET (FORPUS PASSERINUS), A SMALL NEOTROPICAL PARROT BREEDING IN CENTRAL VENEZUELA. THERE ARE STRONG THEORETICAL REASONS TO PREDICT A FEMALE-BIASED SEX RATIO IN THIS SYSTEM ACCORDING TO THE LOCAL RESOURCE HYPOTHESIS; JUVENILE MALES ARE PHILOPATRIC AND THERE ARE HIGH LEVELS OF COMPETITION BETWEEN MALE SIBLINGS FOR ACCESS TO BREE…	JOURNALS DEPT, 2001 EVANS RD, CARY, NC 27513 USA	NA	AEBUDDEN@NATURE.BERKELEY.EDU	NA	NA	NA	2020-10-26	830MG	10.1093/beheco/arh052	NA	NA	1465-7279	NA	NA	NA	NA	NA	1045-2249	BEHAV. ECOL.	BEHAVIORAL ECOLOGY	ENGLISH	NA	JUL	NA	74	4	GREEN PUBLISHED, BRONZE	BUDDEN, AMBER/0000-0003-2885-3980	NA	607-613	OXFORD UNIV PRESS INC	BEHAVIORAL SCIENCES; LIFE SCIENCES \& BIOMEDICINE - OTHER TOPICS; ENVIRONMENTAL SCIENCES \& ECOLOGY; ZOOLOGY	BUDDEN, AMBER/A-2829-2010 BEISSINGER, STEVEN R/F-3809-2012	NA	23	AGAINST THE ODDS? NESTLING SEX RATIO VARIATION IN GREEN-RUMPED PARROTLETS	ARTICLE	0	5	15	BEHAVIORAL SCIENCES; BIOLOGY; ECOLOGY; ZOOLOGY
ISI000222562500003	rejected off topic illegal trade	Ada Sanchez	BRISCOE JA, 2004, SEMIN AVIAN EXOT PET MED	BRISCOE JA;SYRING R	SPECIAL SPECIES; VENIPUNCTURE; CATHETERIZATION; INTUBATION; EUTHANASIA	NA	BRISCOE, JA (CORRESPONDING AUTHOR), UNIV PENN, MATTHEW J RYAN VET HOSP, SPECIAL SPECIES DEPT, 3900 DELANCEY ST, PHILADELPHIA, PA 19104 USA.; UNIV PENN, SPECIAL SPECIES MED SERV, PHILADELPHIA, PA 19104 USA.; UNIV PENN, SCH VET MED, DEPT CLIN STUDIES, SECT CRIT CARE, PHILADELPHIA, PA 19104 USA.	SPECIAL SPECIES, SUCH AS RABBITS, FERRETS, RODENTS, PARROTS, TURTLES, AND SNAKES, ARE BECOMING MORE POPULAR AS PETS. THUS, IT BECOMES MORE LIKELY THAT A VETERINARIAN MAY BE PRESENTED WITH ONE OF THESE SPECIES ON EMERGENT BASIS. THIS ARTICLE ADDRESSES THE BASIC STEPS OF VASCULAR AND AIRWAY ACCESS FOR EACH GROUP OF SPECIAL SPECIES AND WILL PROVIDE INFORMATION ON TECHNIQUES THAT CAN BE USED TO ENABL…	INDEPENDENCE SQUARE WEST CURTIS CENTER, STE 300, PHILADELPHIA, PA 19106-3399 USA	NA	NA	NA	NA	NA	2020-10-26	836NL	10.1053/j.saep.2004.03.007	NA	NA	NA	NA	NA	NA	NA	NA	1055-937X	SEMIN. AVIAN EXOT. PET MED.	SEMINARS IN AVIAN AND EXOTIC PET MEDICINE	ENGLISH	NA	JUL	NA	18	3	NA	NA	NA	118-131	W B SAUNDERS CO	VETERINARY SCIENCES	NA	NA	17	TECHNIQUES FOR EMERGENCY AIRWAY AND VASCULAR ACCESS IN SPECIAL SPECIES	ARTICLE	0	6	13	VETERINARY SCIENCES
ISI000224591700010	rejected off topic illegal trade	Ada Sanchez	FOX RA, 2004, APPL ANIM BEHAV SCI	FOX RA;MILLAM JR	PARROT; PSITTACINE; BEHAVIOR; ENRICHMENT; NEOPHOBIA; BEHAVIORAL; DEVELOPMENT; HAND-REARING; AMAZONA AMAZONICA	PITUITARY-ADRENAL AXIS; INDIVIDUAL-DIFFERENCES; PERSONALITY DIMENSIONS;; STRESS REACTIVITY; ENRICHMENT; BEHAVIOR; TRANSMISSION; GENERATIONS;; RESPONSES; REVERSES	FOX, RA (CORRESPONDING AUTHOR), UNIV CALIF DAVIS, DEPT ANIM SCI, 1 SHIELDS AVE, DAVIS, CA 95616 USA.; UNIV CALIF DAVIS, DEPT ANIM SCI, DAVIS, CA 95616 USA.	EARLY EXPERIENCE IS OFTEN A SIGNIFICANT FACTOR IN SHAPING ANIMALS' LATER BEHAVIOR. EARLY MATERNAL SEPARATION IS ASSOCIATED WITH NEGATIVE BEHAVIORAL OUTCOMES, SUCH AS INCREASED FEARFULNESS IN RATS, WHILE HIGHER LEVELS OF MATERNAL GROOMING DURING THE NEONATAL PERIOD ARE ASSOCIATED WITH DECREASED FEARFULNESS AND INCREASED EXPLORATORY BEHAVIOR. THIS FINDING MAY HAVE IMPLICATIONS FOR THE WELFARE OF CA…	PO BOX 211, 1000 AE AMSTERDAM, NETHERLANDS	NA	RAFOX@UCDAVIS.EDU	NA	NA	NA	2020-10-26	863VO	10.1016/j.applanim.2004.05.002	NA	NA	NA	NA	NA	NA	NA	NA	0168-1591	APPL. ANIM. BEHAV. SCI.	APPLIED ANIMAL BEHAVIOUR SCIENCE	ENGLISH	NA	NOV	NA	20	12	NA	NA	NA	117-129	ELSEVIER SCIENCE BV	AGRICULTURE; BEHAVIORAL SCIENCES; VETERINARY SCIENCES	NA	NA	40	THE EFFECT OF EARLY ENVIRONMENT ON NEOPHOBIA IN ORANGE-WINGED AMAZON PARROTS (AMAZONA AMAZONICA)	ARTICLE	0	45	89	AGRICULTURE, DAIRY \& ANIMAL SCIENCE; BEHAVIORAL SCIENCES; VETERINARY SCIENCES
ISI000224662100014	rejected off topic illegal trade	JRFP	BRIGHTSMITH D, 2005, BIOL CONSERV	BRIGHTSMITH D;HILBURN J;DEL CAMPO A;BOYD J;FRISIUS M;FRISIUS R;JANIK D;GUILLEN F	REINTRODUCTION; MACAW; PSITTACIFORMES; SUPPLEMENTAL FEEDING; PERU; COSTA; RICA; CAPTIVE BREEDING; DISEASE; HAND-RAISED; SOCIALIZATION	FOREST BIRD COMMUNITY; TRANSLOCATION; SUCCESS; CONSERVATION;; LIMITATIONS; PARROTS; ISLAND	BRIGHTSMITH, D (CORRESPONDING AUTHOR), DUKE UNIV, DEPT BIOL, DURHAM, NC 27712 USA.; DUKE UNIV, DEPT BIOL, DURHAM, NC 27712 USA.; SELVA REPS, RAINFOREST EXPEDIT, LIMA 18, PERU.; AMIGOS AVES USA, SLIDELL, LA 70458 USA.; FDN RESTAURAC NATURALEZA, ALAJUELA, COSTA RICA.; AMIGOS AVES, ALAJUELA, COSTA RICA.	THIS STUDY REPORTS ON THREE SCARLET MACAW (ARA MACAO) REINTRODUCTION PROJECTS USING HAND-RAISED BIRDS IN PERU AND COSTA RICA. THE HABITATS AT THE RELEASE SITES RANGED FROM PRISTINE TROPICAL FOREST TO FOREST FRAGMENTS IN AN AGRICULTURAL MATRIX. THE COMBINED FIRST-YEAR SURVIVAL WAS 74\% AND THE ANNUAL POST FIRST-YEAR SURVIVAL WAS 96\%. SURVIVAL RATES WERE VERY HIGH DESPITE A WIDE RANGE IN PREDATOR …	THE BOULEVARD, LANGFORD LANE, KIDLINGTON, OXFORD OX5 1GB, OXON, ENGLAND	NA	DIB4@DUKE.EDU	NA	NA	NA	2020-10-26	864VW	10.1016/j.biocon.2004.05.016	NA	NA	1873-2917	NA	NA	NA	NA	NA	0006-3207	BIOL. CONSERV.	BIOLOGICAL CONSERVATION	ENGLISH	NA	FEB	NA	56	3	NA	BRIGHTSMITH, DONALD/0000-0002-3306-6490	NA	465-472	ELSEVIER SCI LTD	BIODIVERSITY \& CONSERVATION; ENVIRONMENTAL SCIENCES \& ECOLOGY	NA	NA	47	THE USE OF HAND-RAISED PSITTACINES FOR REINTRODUCTION: A CASE STUDY OF SCARLET MACAWS (ARA MACAO) IN PERU AND COSTA RICA	ARTICLE	1	53	121	BIODIVERSITY CONSERVATION; ECOLOGY; ENVIRONMENTAL SCIENCES
ISI000225303200009	rejected illegal trade circunstancial	Ada Sanchez	DE KLOET E, 2004, ARCH VIROL	DE KLOET E;DE KLOET SR	NA	NUCLEOTIDE-SEQUENCE ANALYSIS; POLYMERASE-CHAIN-REACTION; PCR; AMPLIFICATION; TT VIRUS; DNA; CIRCOVIRUS; TRANSLATION; EXTRACTION;; VERTEBRATE; INITIATION	DE KLOET, SR (CORRESPONDING AUTHOR), ANIM GENET INC, 1336 TIMBERLANE RD, TALLAHASSEE, FL 32313 USA.; ANIM GENET INC, TALLAHASSEE, FL 32313 USA.	A STUDY WAS MADE OF THE PHYLOGENETIC RELATIONSHIPS BETWEEN FIFTEEN COMPLETE NUCLEOTIDE SEQUENCES AS WELL AS 43 NUCLEOTIDE SEQUENCES OF THE PUTATIVE COAT PROTEIN GENE OF DIFFERENT STRAINS BELONGING TO THE VIRUS SPECIES BEAK AND FEATHER DISEASE VIRUS OBTAINED FROM 39 INDIVIDUALS OF 16 PSITTACINE SPECIES. THE SPECIES INCLUDED AMONG OTHERS, COCKATOOS (CACATUINI), AFRICAN GREY PARROTS (PSITTACUS ERITH…	SACHSENPLATZ 4-6, PO BOX 89, A-1201 WIEN, AUSTRIA	NA	SIWO@AVIANBIOTECH.COM	NA	NA	NA	2020-10-26	873TF	10.1007/s00705-004-0368-x	NA	NA	1432-8798	NA	NA	NA	NA	NA	0304-8608	ARCH. VIROL.	ARCHIVES OF VIROLOGY	ENGLISH	NA	DEC	NA	46	12	NA	DE KLOET, RON/0000-0001-9176-1830	NA	2393-2412	SPRINGER WIEN	VIROLOGY	NA	NA	30	ANALYSIS OF THE BEAK AND FEATHER DISEASE VIRAL GENOME INDICATES THE EXISTENCE OF SEVERAL GENOTYPES WHICH HAVE A COMPLEX PSITTACINE HOST SPECIFICITY	ARTICLE	0	6	149	VIROLOGY
ISI000225846800026	rejected off topic illegal trade	Ada Sanchez	GILBERT CM, 2004, AUST VET J	GILBERT CM;FILIPPICH LJ;CHARLES BG	NA	CELL LUNG-CANCER; METABOLISM; ADRIAMYCIN; BIRDS	GILBERT, CM (CORRESPONDING AUTHOR), UNIV QUEENSLAND, SCH PHARM, BRISBANE, QLD 4072, AUSTRALIA.; UNIV QUEENSLAND, SCH PHARM, BRISBANE, QLD 4072, AUSTRALIA.; UNIV QUEENSLAND, SCH VET SCI, BRISBANE, QLD 4072, AUSTRALIA.	OBJECTIVE TO DETERMINE THE PHARMACOKINETICS OF DOXORUBICIN IN SULPHUR-CRESTED COCKATOOS, SO THAT ITS USE IN CLINICAL STUDIES IN BIRDS CAN BE CONSIDERED. DESIGN A PHARMACOKINETIC STUDY OF DOXORUBICIN, FOLLOWING A SINGLE INTRAVENOUS (IV) INFUSION OVER 20 MIN, WAS PERFORMED IN FOUR HEALTHY SULPHUR-CRESTED COCKATOOS (CACATUA GALERITA). PROCEDURE BIRDS WERE ANAESTHETISED AND BOTH JUGULAR VEINS WERE CA…	111 RIVER ST, HOBOKEN 07030-5774, NJ USA	NA	NA	NA	NA	NA	2020-10-26	881ES	10.1111/j.1751-0813.2004.tb13246.x	NA	NA	1751-0813	NA	NA	NA	NA	NA	0005-0423	AUST. VET. J.	AUSTRALIAN VETERINARY JOURNAL	ENGLISH	NA	DEC	NA	23	12	NA	NA	NA	769-772	WILEY	VETERINARY SCIENCES	CHARLES, BRUCE/A-3828-2012 CHARLES, BRUCE/G-4411-2010	NA	4	DOXORUBICIN PHARMACOKINETICS FOLLOWING A SINGLE-DOSE INFUSION TO SULPHUR-CRESTED COCKATOOS (CACATUA GALERITA)	ARTICLE	0	3	82	VETERINARY SCIENCES
ISI000226953500026	rejected off topic illegal trade	Ada Sanchez	SMITH KA, 2005, JAVMA-J AM VET MED ASSOC	SMITH KA;BRADLEY KK;STOBIERSKI MG;TENGELSEN LA	NA	PLASMA-CONCENTRATIONS; CHLORTETRACYCLINE; DOXYCYCLINE; WATER; BLOOD;; FEED	SMITH, KA (CORRESPONDING AUTHOR), OHIO DEPT HLTH, 900 FREEWAY DR, COLUMBUS, OH 43229 USA.; OHIO DEPT HLTH, COLUMBUS, OH 43229 USA.	NA	1931 N MEACHAM RD SUITE 100, SCHAUMBURG, IL 60173-4360 USA	NA	NA	NA	NA	NA	2020-10-26	896SJ	10.2460/javma.2005.226.532	NA	NA	NA	NA	NA	NA	NA	NA	0003-1488	JAVMA-J. AM. VET. MED. ASSOC.	JAVMA-JOURNAL OF THE AMERICAN VETERINARY MEDICAL ASSOCIATION	ENGLISH	NA	FEB 15	NA	21	4	NA	NA	NA	532-539	AMER VETERINARY MEDICAL ASSOC	VETERINARY SCIENCES	NA	NA	76	COMPENDIUM OF MEASURES TO CONTROL CHLAMYDOPHILA PSITTACI (FORMERLY CHLAMYDIA PSITTACI) INFECTION AMONG HUMANS (PSITTACOSIS) AND PET BIRDS, 2005	ARTICLE	0	11	226	VETERINARY SCIENCES
ISI000229157200005	rejected off topic illegal trade	Ada Sanchez	ROSENTHAL KL, 2005, J VET DIAGN INVEST	ROSENTHAL KL;JOHNSTON MS;SHOFER FS;POPPENGA RH	AVIAN; CALCIUM; DIURNAL VARIATION; HEAVY METAL; IRON; PHOSPHORUS;; POTASSIUM; ZINC	DIURNAL-VARIATION; ZINC TOXICITY; SERUM ZINC; BIRDS; COPPER; ADULTS;; LIVER; IRON	ROSENTHAL, KL (CORRESPONDING AUTHOR), UNIV PENN, DEPT CLIN STUDIES, 3900 DELANCEY ST, PHILADELPHIA, PA 19104 USA.; UNIV PENN, DEPT CLIN STUDIES, PHILADELPHIA, PA 19104 USA.; UNIV PENN, DEPT PATHOBIOL, PHILADELPHIA, PA 19104 USA.; JAMES L VOSS VET TEACHING HOSP, FT COLLINS, CO 80523 USA.	DURING THE PAST 2 DECADES, THE POTENTIAL FOR EXCESSIVE EXPOSURE OF PET BIRDS TO ZINC HAS BECOME A CONCERN FOR MANY PET BIRD OWNERS. IDEALLY, AVIAN ZINC TOXICOSIS IS DIAGNOSED ON THE BASIS OF HISTORY OF EXPOSURE TO ZINC, RADIOGRAPHIC EVIDENCE OF INGESTED METAL, OCCURRENCE OF MELENA, DETECTION OF AN ELEVATED PLASMA ZINC CONCENTRATION. AND RESPONSE TO TREATMENT. HOWEVER, MOST PET BIRDS SUSPECTED OF …	PO BOX 1522, TURLOCK, CA 95381 USA	NA	NA	NA	NA	NA	2020-10-26	926XO	10.1177/104063870501700304	NA	NA	NA	NA	NA	NA	NA	NA	1040-6387	J. VET. DIAGN. INVEST.	JOURNAL OF VETERINARY DIAGNOSTIC INVESTIGATION	ENGLISH	NA	MAY	NA	25	3	BRONZE	NA	NA	239-244	AMER ASSOC VETERINARY LABORATORY DIAGNOSTICIANS INC	VETERINARY SCIENCES	NA	NA	4	PSITTACINE PLASMA CONCENTRATIONS OF ELEMENTS: DAILY FLUCTUATIONS AND CLINICAL IMPLICATIONS	ARTICLE	0	8	17	VETERINARY SCIENCES
ISI000230319200025	rejected overview	Ada Sanchez	GUEDES NMR, 2004, ORNITOL NEOTROP	GUEDES NMR	MACAWS; MANAGEMENT; CONSERVATION; SCARLET MACAW; RED-AND-GREEN MACAW;; GREAT GREEN MACAW; LEAR'S MACAW; HYACINTH MACAW; PERU; COSTA RICA;; BRAZIL	NA	GUEDES, NMR (CORRESPONDING AUTHOR), UNIDERP, PROJETO ARARA AZUL, RUA KLAUS STHURK 178, BR-79051660 CAMPO GRANDE, MS, BRAZIL.; UNIDERP, PROJETO ARARA AZUL, BR-79051660 CAMPO GRANDE, MS, BRAZIL.	MACAWS AND PARROTS (PSITTACIFORMES) REPRESENT ONE OF THE WORLD'S MOST ENDANGERED GROUPS OF BIRDS. FOR CENTURIES, MACAWS HAVE BEEN CAPTURED FOR THEIR FEATHERS AND TO BE USED AS PETS. THE MAIN FACTORS THREATENING MACAWS ARE HABITAT DESTRUCTION (LOSS AND FRAGMENTATION), POACHING OR CAPTURE FOR COMMERCE (FEATHERS, EGGS, CHICKS, ADULTS). OTHER IMPORTANT FACTORS ARE ENDOGAMY AND RESTRICTED GEOGRAPHIC D…	UNIV GEORGIA, WARNELL SCH FOREST RESOURCES, ATHENS, GA 30602-2152 USA	NA	PROJETOARARAAZUL@UOL.COM.BR	NA	NA	NA	2020-10-26	942YQ	NA	NA	NA	NA	NA	NA	NA	NA	NA	1075-4377	ORNITOL. NEOTROP.	ORNITOLOGIA NEOTROPICAL	ENGLISH	NA	NA	7TH NEOTROPICAL ORNITHOLOGICAL CONGRESS, PUYEHUE, CHILE, OCT 05-11, 2003	13	NA	NA	NA	NA	279-283	NEOTROPICAL ORNITHOLOGICAL SOC, USGS PATUXENT WILDLIFE RESEARCH CTR	ZOOLOGY	NA	NA	6	MANAGEMENT AND CONSERVATION OF THE LARGE MACAWS IN THE WILD	ARTICLE; PROCEEDINGS PAPER	0	41	15	ORNITHOLOGY
ISI000230855300007	rejected off topic parrots	JRFP	REYES-NIVIA MC, 2004, REV BIOL TROP	REYES-NIVIA MC;GARZON-FERREIRA J;RODRIGUEZ-RAMIREZ A	PREDATION OF CORALS; REEF FISHES; SPARISOMA VIRIDE; COLOMBIAN CARIBBEAN	SPARISOMA-VIRIDE; REEF; PARROTFISH; BIOEROSION; SCARIDAE; DESTRUCTION;; COMMUNITY; VENEZUELA; PATTERNS; BARBADOS	REYES-NIVIA, MC (CORRESPONDING AUTHOR), INVEMAR, INST INVEST MARINAS \& COSTERAS, SANTA MARTA 1016, COLOMBIA.; INVEMAR, INST INVEST MARINAS \& COSTERAS, SANTA MARTA 1016, COLOMBIA.	LIVE CORAL PREDATION BY FISH IN TAYRONA NATURE NATIONAL PARK, COLOMBIAN CARIBBEAN. LIVE CORAL PREDATION BY FISH WAS EVALUATED IN TWO BAYS OF THE TAYRONA NATIONAL NATURAL PARK (COLOMBIA), AS A POSSIBLE BIOLOGICAL AGENT CAUSING CORAL MORTALITY. VISUAL CENSUSES WERE USED TO IDENTIFY THE MOST IMPORTANT PREDATOR. PREDATION INCIDENCE WAS DETERMINED BY EXAMINING ALL COLONIES PRESENT IN PERMANENT BELT TR…	UNIVERSIDAD DE COSTA RICA CIUDAD UNIVERSITARIA, SAN JOSE, 00000, COSTA RICA	NA	CATAREYES@INVEMAR.ORG.CO JGARZON@INVEMAR.ORG.CO BETOROD@INVEMAR.ORG.CO	NA	NA	NA	2020-10-26	950KF	NA	NA	NA	2215-2075	NA	NA	NA	NA	NA	0034-7744	REV. BIOL. TROP.	REVISTA DE BIOLOGIA TROPICAL	SPANISH	NA	DEC	NA	43	4	DOAJ GOLD	NA	NA	883-895	REVISTA DE BIOLOGIA TROPICAL	LIFE SCIENCES \& BIOMEDICINE - OTHER TOPICS	NA	NA	14	LIVE CORAL PREDATION BY FISH IN TAYRONA NATURE NATIONAL PARK, COLOMBIAN CARIBBEAN	ARTICLE	1	4	52	BIOLOGY
ISI000230998800001	included in review	Ada Sanchez	VAUGHAN C, 2005, BIRD CONSERV INT	VAUGHAN C;NEMETH NM;CARY J;TEMPLE S	NA	FOREST	VAUGHAN, C (CORRESPONDING AUTHOR), UNIV WISCONSIN, DEPT WILDLIFE ECOL, MADISON, WI 53706 USA.; UNIV WISCONSIN, DEPT WILDLIFE ECOL, MADISON, WI 53706 USA.; UNIV NACL, REG WILDLIFE MANAGEMENT PROGRAM, HEREDIA, COSTA RICA.; MILWAUKEE PUBL MUSEUM, MILWAUKEE, WI USA.	THE CENTRAL PACIFIC CONSERVATION AREA CONTAINS ONE OF COSTA RICA'S TWO VIABLE, BUT THREATENED SCARLET MACAW ARA MACAO POPULATIONS. FOR 14 YEARS (1990-2003), WE MONITORED THE SIZE OF THIS POPULATION. NON-LINEAR MODELS FITTED TO 1990-1994 OBSERVATIONS REVEALED SEASONAL AND LONG-TERM CHANGES IN POPULATION SIZE. THE PEAK OF ANNUAL POPULATION SIZE OCCURRED IN AUGUST, WITH A CYCLIC RANGE OF ABOUT GO BI…	32 AVENUE OF THE AMERICAS, NEW YORK, NY 10013-2473 USA	NA	CVAUGHAN@WISC.EDU NNEMETH@COLOSTATE.EDU	NA	NA	NA	2020-10-26	952JC	NA	NA	NA	1474-0001	NA	NA	NA	NA	NA	0959-2709	BIRD CONSERV. INT.	BIRD CONSERVATION INTERNATIONAL	ENGLISH	NA	JUN	NA	34	2	NA	NA	NA	119-130	CAMBRIDGE UNIV PRESS	BIODIVERSITY \& CONSERVATION; ZOOLOGY	NA	NA	21	RESPONSE OF A SCARLET MACAW ARA MACAO POPULATION TO CONSERVATION PRACTICES IN COSTA RICA	ARTICLE	0	14	15	BIODIVERSITY CONSERVATION; ORNITHOLOGY
ISI000232872700037	rejected off topic parrots	Ada Sanchez	GILBERT CM, 2005, J CHROMATOGR B	GILBERT CM;MCGEARY RP;FILIPPICH LJ;NORRIS BG	DOXORUBICIN; DOXORUBICINOL; PARROT; LIQUID CHROMATOGRAPHY	HPLC METHOD; PHARMACOKINETICS; ASSAY	CHARLES, BG (CORRESPONDING AUTHOR), UNIV QUEENSLAND, SCH PHARM, ST LUCIA CAMPUS, BRISBANE, QLD 4072, AUSTRALIA.; UNIV QUEENSLAND, SCH PHARM, BRISBANE, QLD 4072, AUSTRALIA.; UNIV QUEENSLAND, SCH MOL \& MICROBIAL SCI, ST LUCIA, QLD, AUSTRALIA.; UNIV QUEENSLAND, SCH VET SCI, ST LUCIA, QLD, AUSTRALIA.; AUSTRALIAN CTR PAEDIAT PHARMACOKINET, MATER HLTH SERV, MATER PHARM SERV, BRISBANE, QLD, AUSTRALIA.	A NEW MICROSCALE METHOD IS REPORTED FOR THE DETERMINATION OF DOXORUBICIN AND ITS ACTIVE METABOLITE, DOXORUBICINOL, IN PARROT PLASMA. SAMPLE WORKUP INVOLVED ACETONITRILE PROTEIN PRECIPITATION, ETHYL ACETATE EXTRACTION, FOLLOWED BY BACK EXTRACTION INTO HCL. SEPARATIONS WERE ACHIEVED ON A PHENYL-HEXYL COLUMN AT 30 DEGREES C USING ACETONITRILE (17\%, V/V) IN 0.01 M ORTHOPHOSPHORIC ACID (83\%, V/V) DE…	PO BOX 211, 1000 AE AMSTERDAM, NETHERLANDS	NA	B.CHARLES@PHARMACY.UQ.EDU.AU	NA	NA	NA	2020-10-26	978KS	10.1016/j.jchromb.2005.08.017	NA	NA	1873-376X	NA	NA	NA	NA	NA	1570-0232	J. CHROMATOGR. B	JOURNAL OF CHROMATOGRAPHY B-ANALYTICAL TECHNOLOGIES IN THE BIOMEDICAL AND LIFE SCIENCES	ENGLISH	NA	NOV 5	NA	10	12	NA	MCGEARY, ROSS/0000-0001-9149-6264	NA	273-276	ELSEVIER SCIENCE BV	BIOCHEMISTRY \& MOLECULAR BIOLOGY; CHEMISTRY	CHARLES, BRUCE/A-3828-2012 CHARLES, BRUCE/G-4411-2010	NA	24	SIMULTANEOUS LIQUID CHROMATOGRAPHIC DETERMINATION OF DOXORUBICIN AND ITS MAJOR METABOLITE DOXORUBICINOL IN PARROT PLASMA	ARTICLE	0	3	826	BIOCHEMICAL RESEARCH METHODS; CHEMISTRY, ANALYTICAL
ISI000233256500013	rejected illegal trade circunstancial	Ada Sanchez	PERRIN MR, 2005, OSTRICH	PERRIN MR	NA	QUATERNARY CLIMATIC-CHANGE; AFROMONTANE FORESTS; NORTHERN PROVINCE;; GREYHEADED PARROT; CONSERVATION; PATTERNS; REICHENOW	PERRIN, MR (CORRESPONDING AUTHOR), UNIV KWAZULU NATAL, SCH BIOL \& CONSERVAT SCI, RES CTR PARROT CONSERVAT, PRIVATE BAG X01, ZA-3209 PIETERMARITZBURG, SOUTH AFRICA.; UNIV KWAZULU NATAL, SCH BIOL \& CONSERVAT SCI, RES CTR PARROT CONSERVAT, ZA-3209 PIETERMARITZBURG, SOUTH AFRICA.	A REVIEW OF THE TAXONOMIC STATUS OF THE CRITICALLY ENDANGERED CAPE PARROT POICEPHALUS ROBUSTUS GMELIN 1788 HAS IMPORTANT IMPLICATIONS CONCERNING THE CONSERVATION OF THIS SPECIES AND ILLEGAL TRADE. IT IS DISTINGUISHABLE FROM THE BROWN-NECKED PARROT P. FUSCICOLLIS FUSCICOLLIS KUHL 1820 ON THE MORPHOMETRICS OF THE BODY AND BILL, TWO MITOCHONDRIAL DNA SEQUENCES AND ITS ECOLOGY AND BEHAVIOUR. THE GREY…	19 WORCESTER STREET, PO BOX 377, GRAHAMSTOWN 6140, SOUTH AFRICA	NA	PERRIN@UKZN.AC.ZA	NA	NA	NA	2020-10-26	983UB	NA	NA	NA	1727-947X	NA	NA	NA	NA	NA	0030-6525	OSTRICH	OSTRICH	ENGLISH	NA	OCT	NA	76	34	NA	NA	NA	195-205	NATL INQUIRY SERVICES CENTRE PTY LTD	ZOOLOGY	NA	NA	9	A REVIEW OF THE TAXONOMIC STATUS AND BIOLOGY OF THE CAPE PARROT POICEPHALUS ROBUSTUS, WITH REFERENCE TO THE BROWN-NECKED PARROT P FUSCIOLLIS FUSCIOLLIS AND THE GREY-HEADED PARROT P-F SUAHELICUS	ARTICLE	0	5	76	ORNITHOLOGY
ISI000234133700013	rejected off topic illegal trade	Ada Sanchez	GUNKEL C, 2005, SEMIN AVIAN EXOT PET MED	GUNKEL C;LAFORTUNE M	ANESTHESIA; AVIAN; BIRDS; ISOFLURANE; PSCITTACINES	CARDIOPULMONARY DOSE-RESPONSE; BLOOD-CELL TRANSFUSIONS; PIGEONS; COLUMBA-LIVIA; PROPOFOL ANESTHESIA; ISOFLURANE; MEDETOMIDINE; KETAMINE;; INDUCTION; HALOTHANE; DOXAPRAM	GUNKEL, C (CORRESPONDING AUTHOR), OREGON STATE UNIV, COLL VET MED, DEPT ANESTHESIOL, 227 MAGRUDER HALL, CORVALLIS, OR 97331 USA.; OREGON STATE UNIV, COLL VET MED, DEPT ANESTHESIOL, CORVALLIS, OR 97331 USA.; HOUZTON ZOO INC, HOUSTON, TX 77030 USA.	BIRDS OFTEN REQUIRE ANESTHESIA FOR DIAGONOSTIC OR THERAPEUTIC PURPOSES. THE PROVISION OF ANESTHESIA WITH A LOW RISK OF COMPLICATIONS IS, IN PART ASSOCIATED WITH A WORKING KNOWLEDGE OF AVIAN CARDIOPULMONARY PHYSIOLOGY. INHALANT ANESTHESIA REMAINS THE TECHNIQUE OF CHOICE FOR ANESTHESIA OF BIRDS. ANESTHETIC DRUGS, AND TECHNIQUES, INCLUDING AIR SAC CANNULATION AND INTRAOSSEOUS CATHETERIZATION, FOR PE…	1600 JOHN F KENNEDY BOULEVARD, STE 1800, PHILADELPHIA, PA 19103-2899 USA	NA	CONNY.GUNKEL@OREGONSTATE.EDU	NA	NA	NA	2020-10-26	995VX	10.1053/j.saep.2005.09.006	NA	NA	NA	NA	NA	NA	NA	NA	1055-937X	SEMIN. AVIAN EXOT. PET MED.	SEMINARS IN AVIAN AND EXOTIC PET MEDICINE	ENGLISH	NA	OCT	NA	59	4	NA	NA	NA	263-276	W B SAUNDERS CO-ELSEVIER INC	VETERINARY SCIENCES	NA	NA	31	CURRENT TECHNIQUES IN AVIAN ANESTHESIA	ARTICLE	3	31	14	VETERINARY SCIENCES
ISI000234153500017	included in review	JRFP	JEPSON P, 2005, ORYX	JEPSON P;LADLE RJ	BIRDS; BIRD TRADE; CITES; CULTURE; INDONESIA; MARKET-LED CONSERVATION	NA	JEPSON, P (CORRESPONDING AUTHOR), UNIV OXFORD, CTR ENVIRONM, BIODIVERS RES GRP, DYSON PERRINS BLDG, OXFORD OX1 3QY, ENGLAND.; UNIV OXFORD, CTR ENVIRONM, BIODIVERS RES GRP, OXFORD OX1 3QY, ENGLAND.; UNIV OXFORD, CTR ENVIRONM, ENVIRONM CHANGE INST, OXFORD OX1 3QY, ENGLAND.	BIRD-KEEPING IS AN EXTREMELY POPULAR PASTIME IN INDONESIA, WHERE THERE IS A THRIVING INTERNAL MARKET IN BOTH WILD-CAUGHT AND CAPTIVE-BRED BIRDS. HOWEVER, LITTLE IS KNOWN ABOUT WHETHER THE SCALE OF BIRD-KEEPING REPRESENTS A GENUINE CONSERVATION THREAT TO NATIVE POPULATIONS. HERE WE PRESENT THE RESULTS OF THE LARGEST EVER SURVEY OF BIRD-KEEPING AMONG HOUSEHOLDS IN INDONESIA'S FIVE MAJOR CITIES. BIR…	40 WEST 20TH ST, NEW YORK, NY 10011-4211 USA	NA	PAUL.JEPSON@OUCE.OX.AC.UK	NA	NA	NA	2020-10-26	996DB	10.1017/S0030605305001110	NA	NA	NA	NA	NA	NA	NA	NA	0030-6053	ORYX	ORYX	ENGLISH	NA	OCT	NA	14	4	BRONZE, GREEN PUBLISHED	LADLE, RICHARD/0000-0003-3200-3946 JEPSON, PAUL R/0000-0003-1419-9981	NA	442-448	CAMBRIDGE UNIV PRESS	BIODIVERSITY \& CONSERVATION; ENVIRONMENTAL SCIENCES \& ECOLOGY	LADLE, RICHARD/E-4228-2014	NA	71	BIRD-KEEPING IN INDONESIA: CONSERVATION IMPACTS AND THE POTENTIAL FOR SUBSTITUTION-BASED CONSERVATION RESPONSES	ARTICLE	0	19	39	BIODIVERSITY CONSERVATION; ECOLOGY
ISI000234303300002	rejected off topic illegal trade	Ada Sanchez	KALETA EF, 2005, DTSCH TIERARZTL WOCHENSCHR	KALETA EF;HERGARTEN G;YILMAZ A	AVIAN INFLUENZA A VIRUSES; AVIAN FLU; FOWL PLAGUE; HPAI; LPAI; ECOLOGY;; ORNITHOLOGY; DIAGNOSTICS	HEMAGGLUTININ SUBTYPE; AQUATIC BIRDS; NEURAMINIDASE; ANTIGEN	KALETA, EF (CORRESPONDING AUTHOR), UNIV GIESSEN, FACHBEREICH VET MED, KLIN VOGEL REPTILIEN AMPHIBIEN \& FISCHE, FRANKFURTER STR 91-93, D-35392 GIESSEN, GERMANY.; UNIV GIESSEN, FACHBEREICH VET MED, KLIN VOGEL REPTILIEN AMPHIBIEN \& FISCHE, D-35392 GIESSEN, GERMANY.; INST TIERSEUCHEN DIAGNOST, FACHBEREICH TIERMED, LANDESUNTERSUCHUNGSAMT RHEINLAND PFALZ, D-56073 KOBLENZ, GERMANY.	AVIAN INFLUENZA A VIRUSES (AIV) ARE THE CAUSATIVE AGENTS OF THE PRESENTLY MOST IMPORTANT POULTRY DISEASE. TEN COUNTRIES IN ASIA AND SEVERAL OTHER COUNTRIES IN EASTERN EUROPE SUFFER HIGH LOSSES FROM THE LETHAL EFFECTS OF THESE VIRUSES OF THE H5N1 SUBTYPE. AIV OF OTHER SUBTYPES CAUSE IN ADDITIONAL COUNTRIES SEVERE LOSSES. THE THREAT TO HEALTH AND WELL-BEING OF THE AVIFAUNA, DOMESTIC POULTRY AND POS…	BORSIGSTRASSE 5, POSTFACH 16 42, 310460 ALFELD, GERMANY	NA	ERHARD.F.KALETA@VETMED.UNI-GIESSEN.DE	NA	NA	NA	2020-10-26	998FF	NA	NA	NA	NA	NA	NA	NA	NA	NA	0341-6593	DTSCH. TIERARZTL. WOCHENSCHR.	DEUTSCHE TIERARZTLICHE WOCHENSCHRIFT	GERMAN	NA	DEC	NA	41	12	NA	NA	NA	448-456	M H SCHAPER GMBH CO KG	VETERINARY SCIENCES	NA	NA	43	AVIAN INFLUENZA A VIRUSES IN BIRDS - AN ECOLOGICAL, ORNITHOLOGICAL AND VIROLOGICAL VIEW.	ARTICLE	1	29	112	VETERINARY SCIENCES
ISI000234567900004	rejected off topic illegal trade	Ada Sanchez	SENTHURAN S, 2005, ACTA VIROL	SENTHURAN S;VIJAYARANI K;KUMANAN K;NAINAR AM	NEWCASTLE DISEASE VIRUS; PET BIRDS; PATHOTYPING; FUSION PROTEIN CLEAVAGE; SITE; PHYLOGENETIC ANALYSIS; RT-PCR; SEQUENCING	AVIAN PARAMYXOVIRUS TYPE-1; UNITED-STATES; EXOTIC BIRDS; SEQUENCE	KUMANAN, K (CORRESPONDING AUTHOR), TAMIL NADU AGR UNIV, MADRAS VET COLL, DEPT ANIM BIOTECHNOL, MADRAS 600007, TAMIL NADU, INDIA.; TAMIL NADU AGR UNIV, MADRAS VET COLL, DEPT ANIM BIOTECHNOL, MADRAS 600007, TAMIL NADU, INDIA.; ANIM SCI UNIV, MADRAS 600007, TAMIL NADU, INDIA.	FOUR NEWCASTLE DISEASE VIRUS (NDV) ISOLATES OBTAINED FROM A PIGEON, LORY, PARROT, AND LOVE BIRD WERE SUBJECTED TO BIOLOGICAL AND MOLECULAR CHARACTERIZATION. ALL THE ISOLATES WERE IDENTIFIED AS VELOGENIC WITH INTRACEREBRAL PATHOGENICITY INDICES (ICPI) OF 1.9-2.0. ALL THE ISOLATES HAD A (112)RRQKRF(117) MOTIF IN THE FUSION PROTEIN CLEAVAGE SITE (FPCS), TYPICAL FOR PATHOGENIC NDV. PHYLOGENETIC ANALY…	BAJZOVA 7, BRATISLAVA, 821 08, SLOVAKIA	NA	KUMANANRANI@HOTMAIL.COM	NA	NA	NA	2020-10-26	001UJ	NA	NA	NA	1336-2305	NA	NA	NA	NA	NA	0001-723X	ACTA VIROL.	ACTA VIROLOGICA	ENGLISH	NA	NA	NA	28	3	NA	NA	NA	177-182	AEPRESS SRO	VIROLOGY	NA	NA	5	PATHOTYPING OF NEWCASTLE DISEASE VIRUS ISOLATES FROM PET BIRDS	ARTICLE	0	4	49	VIROLOGY
ISI000234771200023	included in review	Ada Sanchez	HAWKINS MG, 2006, JAVMA-J AM VET MED ASSOC	HAWKINS MG;CROSSLEY BM;OSOFSKY A;WEBBY RJ;LEE CW;SUAREZ DL;HIETALA SK	NA	NEWCASTLE-DISEASE VIRUS; CLEAVAGE SITE; PCR ASSAY; PATHOGENICITY; BIRDS	HAWKINS, MG (CORRESPONDING AUTHOR), UNIV CALIF DAVIS, SCH VET MED, DEPT MED \& EPIDEMIOL, DAVIS, CA 95616 USA.; UNIV CALIF DAVIS, SCH VET MED, DEPT MED \& EPIDEMIOL, DAVIS, CA 95616 USA.; UNIV CALIF DAVIS, VET MED TEACHING HOSP, DAVIS, CA 95616 USA.; UNIV CALIF DAVIS, CALIF ANIM HLTH \& FOOD SAFETY LAB SYST, DAVIS, CA 95616 USA.; USDA ARS, SE POULTRY RES LAB, SE POULTRY RES LAB, ATHENS, GA 30605 …	CASE DESCRIPTION-A 3-MONTH-OLD RED-LORED AMAZON PARROT (AMAZONA AUTUMNALIS AUTUMNALIS) WAS EVALUATED FOR SEVERE LETHARGY. CLINICAL FINDINGS-AVIAN INFLUENZA VIRUS HEMAGGLUTININ SUBTYPE H5N2 WITH LOW PATHOGENICITY WAS CHARACTERIZED BY VIRUS ISOLATION, REAL-TIME REVERSE TRANSCRIPTASE PCR ASSAY, CHICKEN INTRAVENOUS PATHOGENICITY INDEX, AND REFERENCE SERA. THE VIRUS WAS ALSO DETERMINED TO BE CLOSELY R…	1931 N MEACHAM RD SUITE 100, SCHAUMBURG, IL 60173-4360 USA	NA	NA	NA	NA	NA	2020-10-26	004RZ	10.2460/javma.228.2.236	NA	NA	1943-569X	NA	NA	NA	NA	NA	0003-1488	JAVMA-J. AM. VET. MED. ASSOC.	JAVMA-JOURNAL OF THE AMERICAN VETERINARY MEDICAL ASSOCIATION	ENGLISH	NA	JAN 15	NA	24	2	NA	SUAREZ, DAVID/0000-0003-4582-6116	NA	236-241	AMER VETERINARY MEDICAL ASSOC	VETERINARY SCIENCES	WEBBY, RICHARD J/N-5657-2018	NA	20	AVIAN INFLUENZA A VIRUS SUBTYPE H5N2 IN A RED-LORED AMAZON PARROT	ARTICLE	1	7	228	VETERINARY SCIENCES
ISI000235248000016	included in review	Ada Sanchez	SANZ V, 2006, CONDOR	SANZ V;RODRIGUEZ-FERRARO A	AMAZONA BARBADENSIS; BREEDING BIOLOGY; MARGARITA ISLAND; MORTALITY; FACTORS; PRODUCTIVITY; VENEZUELA; YELLOW-SHOULDERED PARROT	BREEDING BIOLOGY; NESTING SUCCESS; COCKATOO; FOOD; CONSERVATION;; VARIABILITY; VIABILITY; SURVIVAL; GROWTH; SEASON	SANZ, V (CORRESPONDING AUTHOR), INST VENEZOLANO INVEST CIENT, CTR ECOL, APDO 21827, CARACAS 1020A, VENEZUELA.; PROVITA, CARACAS 1041A, VENEZUELA.	WE STUDIED THE BREEDING BIOLOGY OF THE YELLOW-SHOULDERED PARROT (AMAZONA BARBADENSIS) ON MARGARITA ISLAND FROM MARCH-AUGUST, 1990 TO 1999. THE TIMING OF THE DIFFERENT PHASES (EGG-LAYING, HATCHING, FLEDGING) WAS CONSISTENT OVER THE YEARS, EXCEPT DURING 1998 WHEN ALL PHASES WERE DELAYED. THE AVERAGE CLUTCH SIZE WAS 3.38 � 0.78 EGGS PER NEST, WITH A RANGE OF ONE TO FIVE EGGS PER CLUTCH, AND MOST EGG…	ORNITHOLOGICAL SOC NORTH AMER PO BOX 1897, LAWRENCE, KS 66044-8897 USA	NA	VSANZ@IVIC.VE ARPPF@STUDENTMAIL.UMSL.EDU	NA	NA	NA	2020-10-26	011DL	10.1650/0010-5422(2006)108[0178:RPAPOT]2.0.CO;2	NA	NA	1938-5129	NA	NA	NA	NA	NA	0010-5422	CONDOR	CONDOR	ENGLISH	NA	FEB	NA	54	1	NA	NA	NA	178-192	COOPER ORNITHOLOGICAL SOC	ZOOLOGY	NA	NA	23	REPRODUCTIVE PARAMETERS AND PRODUCTIVITY OF THE YELLOW-SHOULDERED PARROT ON MARGARITA ISLAND, VENEZUELA: A LONG-TERM STUDY	ARTICLE	0	9	108	ORNITHOLOGY
ISI000235416500006	rejected off topic illegal trade	Ada Sanchez	HOLT E, 2006, VET OPHTHALMOL	HOLT E;ROSENTHAL K;SHOFER FS	PHENOL RED THREAD (PRT) TEAR TEST; PSITTACIFORMES	DOGS	HOLT, E (CORRESPONDING AUTHOR), UNIV PENN, VET HOSP, SCH MED, DEPT CLIN STUDIES, PHILADELPHIA, PA 19104 USA.; UNIV PENN, VET HOSP, SCH MED, DEPT CLIN STUDIES, PHILADELPHIA, PA 19104 USA.; UNIV PENN, VET HOSP, SCH MED, DEPT EMERGENCY MED, PHILADELPHIA, PA 19104 USA.	OBJECTIVE TO DEVELOP A STANDARD METHOD FOR MEASURING TEAR PRODUCTION IN LARGE PSITTACIFORMES USING THE PHENOL RED THREAD (PRT) TEAR TEST. TO ESTABLISH MEAN PRT TEAR TEST VALUES IN CLINICALLY NORMAL PET BIRDS AND TO ASSESS THE REPRODUCIBILITY OF THE TEST. ANIMALS TWO GEOGRAPHICALLY DISTINCT POPULATIONS OF HEALTHY, LARGE PSITTACIFORMES (PILOT STUDY AND STUDY POPULATION). SPECIES GROUPS INCLUDE: COC…	9600 GARSINGTON RD, OXFORD OX4 2DQ, OXON, ENGLAND	NA	EHOLT@RVC.AC.UK	NA	NA	NA	2020-10-26	013NR	10.1111/j.1463-5224.2006.00450.x	NA	NA	NA	NA	NA	NA	NA	NA	1463-5216	VET. OPHTHALMOL.	VETERINARY OPHTHALMOLOGY	ENGLISH	NA	MAR-APR	NA	22	2	NA	NA	NA	109-113	BLACKWELL PUBLISHING	VETERINARY SCIENCES	NA	NA	40	THE PHENOL RED THREAD TEAR TEST IN LARGE PSITTACIFORMES	ARTICLE	0	2	9	VETERINARY SCIENCES
ISI000236593400004	included in review	Ada Sanchez	DEEM SL, 2005, J ZOO WILDL MED	DEEM SL;NOSS AJ;CUELLAR RL;KARESH WB	AMAZONA AESTIVA; BOLIVIA; HEMATOLOGY; PLASMA CHEMISTRY; PSITTACINE;; SEROLOGY	HEMATOZOA; PERU	DEEM, SL (CORRESPONDING AUTHOR), SMITHSONIAN INST, NATL ZOOL PK, DEPT ANIM HLTH, WASHINGTON, DC 20008 USA.; WILDLIFE CONSERVAT SOC, FIELD VET PROGRAM, BRONX, NY 10460 USA.; WCS BOLIVIA, SANTA CRUZ, BOLIVIA.	BOLIVIA HAS A TOTAL OF 47 SPECIES OF PSITTACIDAE, SEVEN OF WHICH HAVE BEEN IDENTIFIED IN OUR STUDY SITE, THE SEMIARID GRAN CHACO OF THE ISOSO. ONE SPECIES, THE BLUE-FRONTED PARROT (AMAZONA AESTIVA), IS FREQUENTLY CAPTURED BY LOCAL ISOSENO GUARANF INDIANS FOR EXPLOITATION ON THE NATIONAL AND INTERNATIONAL MARKET. THESE BIRDS ARE OFTEN TEMPORARILY HOUSED IN SMALL VILLAGES UNDER UNHYGIENIC CONDITION…	6 NORTH PENNELL ROAD, MEDIA, PA 19063 USA	NA	NA	NA	NA	NA	2020-10-26	029VV	10.1638/04094.1	NA	NA	NA	NA	NA	NA	NA	NA	1042-7260	J. ZOO WILDL. MED.	JOURNAL OF ZOO AND WILDLIFE MEDICINE	ENGLISH	NA	DEC	NA	18	4	NA	KARESH, WILLIAM/0000-0001-6042-2860	NA	598-605	AMER ASSOC ZOO VETERINARIANS	VETERINARY SCIENCES	KARESH, WILLIAM/AAU-9084-2020	NA	29	HEALTH EVALUATION OF FREE-RANGING AND CAPTIVE BLUE-FRONTED AMAZON PARROTS (AMAZONA AESTIVA) IN THE GRAN CHACO, BOLIVIA	ARTICLE	0	23	36	VETERINARY SCIENCES
ISI000238205600015	included in review	Ada Sanchez	CAHILL AJ, 2006, ORYX	CAHILL AJ;WALKER JS;MARSDEN SJ	CACATUA SULPHUREA CITRINOCRISTATA; CITES; COCKATOO; INDONESIA; PARROT;; POPULATION DENSITY; SUMBA; TRADE BAN	HORNBILL; CITES; SUMBA	MARSDEN, SJ (CORRESPONDING AUTHOR), MANCHESTER METROPOLITAN UNIV, DEPT ENVIRONM \& GEOG SCI, MANCHESTER M1 5GD, LANCS, ENGLAND.; MANCHESTER METROPOLITAN UNIV, DEPT ENVIRONM \& GEOG SCI, MANCHESTER M1 5GD, LANCS, ENGLAND.; MANCHESTER METROPOLITAN UNIV, DEPT BIOL SCI, MANCHESTER M1 5GD, LANCS, ENGLAND.	MORATORIA ON INTERNATIONAL TRADE ARE FREQUENTLY USED TO PROTECT THREATENED SPECIES BUT FEW STUDIES HAVE EXAMINED THEIR EFFECTIVENESS IN ALLOWING POPULATIONS TO RECOVER. WE PRESENT POPULATION DATA COLLECTED BEFORE AND AFTER A MORATORIUM ON TRADE IN THE CITRON-CRESTED COCKATOO CACATUA SULPHUREA CITRINOCRISTATA, A DISTINCTIVE SUBSPECIES OF THE YELLOW-CRESTED COCKATOO ENDEMIC TO SUMBA, INDONESIA. BEF…	32 AVENUE OF THE AMERICAS, NEW YORK, NY 10013-2473 USA	NA	S.MARSDEN@MMU.AC.UK	NA	NA	NA	2020-10-26	052BM	10.1017/S0030605306000366	NA	NA	1365-3008	NA	NA	NA	NA	NA	0030-6053	ORYX	ORYX	ENGLISH	NA	APR	NA	28	2	BRONZE	WALKER, JONATHAN/0000-0003-2571-2429	NA	161-167	CAMBRIDGE UNIV PRESS	BIODIVERSITY \& CONSERVATION; ENVIRONMENTAL SCIENCES \& ECOLOGY	NA	NA	16	RECOVERY WITHIN A POPULATION OF THE CRITICALLY ENDANGERED CITRON-CRESTED COCKATOO CACATUA SULPHUREA CITRINOCRISTATA IN INDONESIA AFTER 10 YEARS OF INTERNATIONAL TRADE CONTROL	ARTICLE	1	21	40	BIODIVERSITY CONSERVATION; ECOLOGY
ISI000238436300012	included in review	Ada Sanchez	CASTILLO AMR, 2006, WILSON J ORNITHOL	CASTILLO AMR;EBERHARD JR	NA	PUERTO-RICAN PARROTS; NESTING-BEHAVIOR; TREE HOLLOWS; AVAILABILITY;; COCKATOOS; SURVIVAL; SITES	EBERHARD, JR (CORRESPONDING AUTHOR), LOUISIANA STATE UNIV, DEPT BIOL SCI, 202 LIFE SCI, BATON ROUGE, LA 70803 USA.; UNIV CHIRIQUI, ESCUELA BIOL, DAVID, PANAMA.; SMITHSONIAN TROP RES INST, BALBOA, PANAMA.	WE STUDIED THE BREEDING BIOLOGY OF THE PANAMANIAN SUBSPECIES OF THE YELLOW-CROWNED PARROT, AMAZONA OCHROCEPHALA PANANTENSIS, DURING 1997-1999 IN THE PROVINCE OF CHIRIQUI, PANAMA, TO PROVIDE BASIC INFORMATION REGARDING THE BREEDING BEHAVIOR AND REPRODUCTIVE SUCCESS OF THESE PARROTS IN THEIR NATURAL HABITAT. WE RECORDED PARROT BEHAVIORS THROUGHOUT THE REPRODUCTIVE PERIOD, MONITORED NEST SUCCESS, AN…	5400 BOSQUE BLVD, STE 680, WACO, TX 76710 USA	NA	EBERHARD@LSU.EDU	NA	NA	NA	2020-10-26	055FV	10.1676/05-003.1	NA	NA	NA	NA	NA	NA	NA	NA	1559-4491	WILSON J. ORNITHOL.	WILSON JOURNAL OF ORNITHOLOGY	ENGLISH	NA	JUN	NA	36	2	NA	NA	NA	225-236	WILSON ORNITHOLOGICAL SOC	ZOOLOGY	NA	NA	19	REPRODUCTIVE BEHAVIOR OF THE YELLOW-CROWNED PARROT (AMAZONA OCHROCEPHALA) IN WESTERN PANAMA	ARTICLE	0	4	118	ORNITHOLOGY
ISI000238466200009	rejected off topic illegal trade	Ada Sanchez	SCHMID R, 2006, APPL ANIM BEHAV SCI	SCHMID R;DOHERR MG;STEIGER A	AFRICAN GREY PARROTS; PSITTACUS ERITHACUS; CAPTIVITY; HAND-REARING;; BREEDING; WILD-CAUGHT	WINGED AMAZON PARROTS	SCHMID, R (CORRESPONDING AUTHOR), 6 ROSEDENE CLOSE, PRESTON PR4 0NG, LANCS, ENGLAND.; UNIV BERN, VETSUISSE FAC, DIV ANIM HOUSING \& WELF, INST ANIM GENET NUTR \& HOUSING, CH-3001 BERN, SWITZERLAND.; UNIV BERN, VETSUISSE FAC, DEPT CLIN VET MED, CH-3001 BERN, SWITZERLAND.	PARROTS ARE OFTEN SYSTEMATICALLY HAND-REARED TO SATISFY THE PET TRADE DEMAND, ALTHOUGH THE EXACT CONSEQUENCES OF HAND-REARING ON THE PARROTS' BEHAVIOUR STILL REMAIN UNKNOWN. THE PURPOSE OF THIS STUDY WAS TO SEE HOW HAND-REARED, PARENT-REARED AND WILD-CAUGHT AFRICAN GREY PARROTS (PSITTACUS ERITHACUS) DIFFER IN THEIR BEHAVIOUR. MOREOVER, THE HAND-RAISED PARROTS WERE DIVIDED INTO SEVERAL CATEGORIES …	RADARWEG 29, 1043 NX AMSTERDAM, NETHERLANDS	NA	RACHEL.SCHMID@LERASOIR.COM	NA	NA	NA	2020-10-26	055QU	10.1016/j.applanim.2005.09.002	NA	NA	1872-9045	NA	NA	NA	NA	NA	0168-1591	APPL. ANIM. BEHAV. SCI.	APPLIED ANIMAL BEHAVIOUR SCIENCE	ENGLISH	NA	JUL	NA	31	34	NA	DOHERR, MARCUS/0000-0003-0064-1708	NA	293-307	ELSEVIER	AGRICULTURE; BEHAVIORAL SCIENCES; VETERINARY SCIENCES	NA	NA	32	THE INFLUENCE OF THE BREEDING METHOD ON THE BEHAVIOUR OF ADULT AFRICAN GREY PARROTS (PSITTACUS ERITHACUS)	ARTICLE	2	41	98	AGRICULTURE, DAIRY \& ANIMAL SCIENCE; BEHAVIORAL SCIENCES; VETERINARY SCIENCES
ISI000239112600014	included in review	Ada Sanchez	PAIN DJ, 2006, ANIM CONSERV	PAIN DJ;MARTINS TLF;BOUSSEKEY M;DIAZ CT;EKSTROM JMM;GARNETT S;GILARDI JD;MCNIVEN D;PRIMOT P;ROUYS S;SAOUMOE M;SYMES CT;TAMUNGANG SA;THEUERKAUF J;VILLAFUERTE L;WIDMANN P;WIDMANN ID	NEST TAKE; PARROTS; TRADE; CITES; PROTECTION	BREEDING BIOLOGY; COCKATOO; CONSERVATION; ISLAND	PAIN, DJ (CORRESPONDING AUTHOR), ROYAL SOC PROTECT BIRDS, THE LODGE, SANDY SG19 2DL, BEDS, ENGLAND.; ROYAL SOC PROTECT BIRDS, SANDY SG19 2DL, BEDS, ENGLAND.; KATALA FDN, PUERTO PRINCESA, PALAWAN, PHILIPPINES.; UNIV KWAZULU NATAL, SCH BIOL \& CONSERVAT SCI, PIETERMARITZBURG, SOUTH AFRICA.; BIRDLIFE INT, CAMBRIDGE, ENGLAND.; WORLD PARROT TRUST, HAYLE, CORNWALL, ENGLAND.; ASSOC SAUVEGARDE PERRUCHE O…	WILD PARROTS REPRESENT ONE OF THE GREATEST COMMERCIAL INTERESTS IN THE LEGAL TRADE IN WILD BIRDS. ALTHOUGH IT IS DIFFICULT TO QUANTIFY, THERE IS A CONSIDERABLE ILLEGAL TRADE IN WILD PARROTS. THIRTY-SIX PER CENT OF THE WORLD'S PARROT SPECIES ARE LISTED BY THE INTERNATIONAL UNION FOR THE CONSERVATION OF NATURE AS THREATENED OR NEAR THREATENED, AND 55\% OF THESE ARE THREATENED TO SOME DEGREE BY TRAD…	111 RIVER ST, HOBOKEN 07030-5774, NJ USA	NA	DEBBIE.PAIN@RSPB.ORG.UK	NA	NA	NA	2020-10-26	064TS	10.1111/j.1469-1795.2006.00040.x	NA	NA	1469-1795	NA	NA	NA	NA	NA	1367-9430	ANIM. CONSERV.	ANIMAL CONSERVATION	ENGLISH	NA	AUG	NA	39	3	NA	GARNETT, STEPHEN/0000-0002-0724-7060 DOWNS, COLLEEN/0000-0001-8334-1510 THEUERKAUF, JORN/0000-0002-7273-3073 SYMES, CRAIG/0000-0002-8027-7055	NA	322-330	WILEY	BIODIVERSITY \& CONSERVATION; ENVIRONMENTAL SCIENCES \& ECOLOGY	GARNETT, STEPHEN/M-3877-2013 DOWNS, COLLEEN/A-7770-2010 THEUERKAUF, JORN/B-6823-2009	NA	54	IMPACT OF PROTECTION ON NEST TAKE AND NESTING SUCCESS OF PARROTS IN AFRICA, ASIA AND AUSTRALASIA	ARTICLE	2	34	9	BIODIVERSITY CONSERVATION; ECOLOGY
ISI000239709100004	rejected illegal trade circunstancial	JRFP	ENGEBRETSON M, 2006, ANIM WELF	ENGEBRETSON M	ANIMAL WELFARE; CAPTIVE PARROTS; CAPTIVE WILDLIFE; COMPANION ANIMALS;; PET OWNERSHIP; PET TRADE	WINGED AMAZON PARROTS; ENVIRONMENTAL ENRICHMENT; FEATHER PICKING; GREY; PARROTS; STEREOTYPIES; PERSPECTIVES	ENGEBRETSON, M (CORRESPONDING AUTHOR), ANIM PROTECT INST, 1122 S ST, SACRAMENTO, CA 95714 USA.; ANIM PROTECT INST, SACRAMENTO, CA 95714 USA.	IN RECENT YEARS THERE HAS BEEN AN INCREASED INTEREST IN STUDIES RELATED TO THE WELFARE OF AVIAN SPECIES COMMONLY KEPT AS COMPANION ANIMALS, SPECIFICALLY THOSE IN THE ORDER PSITTACIFORMES, COMMONLY REFERRED TO AS `PARROTS'. DURING THIS TIME THE BIOLOGY AND BEHAVIOUR OF WILD PARROTS HAS ALSO BECOME BETTER UNDERSTOOD, AIDING THE ASSESSMENT OF WELFARE IN CAPTIVE ENVIRONMENTS. THE IMPACT OF THE PET TR…	OLD SCHOOL, BREWHOUSE HILL, WHEATHAMPSTEAD AL4 8AN, HERTS, ENGLAND	NA	MONICA@API4ANIMALS.ORG	NA	NA	NA	2020-10-26	072YM	NA	NA	NA	NA	NA	NA	NA	NA	NA	0962-7286	ANIM. WELF.	ANIMAL WELFARE	ENGLISH	NA	AUG	NA	93	3	NA	NA	NA	263-276	UNIV FEDERATION ANIMAL WELFARE	VETERINARY SCIENCES; ZOOLOGY	NA	NA	39	THE WELFARE AND SUITABILITY OF PARROTS AS COMPANION ANIMALS: A REVIEW	ARTICLE	1	75	15	VETERINARY SCIENCES; ZOOLOGY
ISI000239978900013	rejected off topic illegal trade	Ada Sanchez	GUMPENBERGER M, 2006, VET RADIOL ULTRASOUND	GUMPENBERGER M;KOLM G	AVIAN; BIOMETRY; COMPUTED TOMOGRAPHY; EYE; LENS LUXATION;; ULTRASONOGRAPHY	B-MODE ULTRASONOGRAPHY; RADIOGRAPHIC ANATOMY; CATARACT-EXTRACTION;; AMAZON PARROT; OWL; RAPTORS; LESIONS; ORBIT; SKULL; HAWK	GUMPENBERGER, M (CORRESPONDING AUTHOR), UNIV VET MED, RADIOL CLIN, VET PL 1, A-1210 VIENNA, AUSTRIA.; UNIV VET MED, RADIOL CLIN, A-1210 VIENNA, AUSTRIA.; UNIV VET MED, DEPT ANIM BREEDING \& REPROD, A-1210 VIENNA, AUSTRIA.	ULTRASONOGRAPHY (US) AND COMPUTED TOMOGRAPHY (CT) WERE PERFORMED AFTER ROUTINE OPHTHALMOLOGIC AND OPHTHALMOSCOPIC EXAMINATIONS IN 190 EYES OF SIX VARIOUS DIURNAL (COMMON BUZZARD [BUTEO BUTEO L., 1758], N=20; COMMON KESTREL [TINNUNCULUS TINNUNCULUS L., 1758], N=20) AND NOCTURNAL RAPTOR SPECIES (BARN OWL [TYTO ALBA L., 1758], N=22; TAWNY OWL [STRIX ALUCO L., 1758], N=8; LONG-EARED OWL [ASIO OTUS L.…	9600 GARSINGTON RD, OXFORD OX4 2DQ, OXON, ENGLAND	NA	MICHAELA.GUMPENBERGER@VU-WIEN.AC.AT	NA	NA	NA	2020-10-26	076SV	10.1111/j.1740-8261.2006.00168.x	NA	NA	NA	NA	NA	NA	NA	NA	1058-8183	VET. RADIOL. ULTRASOUND	VETERINARY RADIOLOGY \& ULTRASOUND	ENGLISH	NA	SEP-OCT	NA	32	5	NA	GUMPENBERGER, MICHAELA/0000-0003-2412-0501	NA	492-502	BLACKWELL PUBLISHING	VETERINARY SCIENCES	NA	NA	39	ULTRASONOGRAPHIC AND COMPUTED TOMOGRAPHIC EXAMINATIONS OF THE AVIAN EYE: PHYSIOLOGIC APPEARANCE, PATHOLOGIC FINDINGS, AND COMPARATIVE BIOMETRIC MEASUREMENT	ARTICLE	2	14	47	VETERINARY SCIENCES
ISI000240005300003	rejected off topic illegal trade	Ada Sanchez	JESCHKE JM, 2006, GLOB CHANGE BIOL	JESCHKE JM;STRAYER DL	ALIENS; ESTABLISHMENT; EXOTICS; INTRODUCTION; INVASION; NATURALIZED; SPECIES; NONINDIGENOUS SPECIES; NONNATIVE SPECIES; SEXUAL DIMORPHISM;; SPREAD	LIFE-HISTORY TRAITS; ESTABLISHMENT SUCCESS; BEHAVIORAL FLEXIBILITY;; SEXUAL SELECTION; BIRDS; FISH; PSITTACIFORMES; DICHROMATISM; EXTINCTION;; TRANSPORT	JESCHKE, JM (CORRESPONDING AUTHOR), UNIV HELSINKI, DEPT BIOL \& ENVIRONM SCI, LAB ECOL \& EVOLUTIONARY DYNAM, POB 65, FIN-00014 HELSINKI, FINLAND.; INST ECOSYST STUDIES, MILLBROOK, NY 12545 USA.	SPECIES THAT ARE FREQUENTLY INTRODUCED TO AN EXOTIC RANGE HAVE A HIGH POTENTIAL OF BECOMING INVASIVE. BESIDES PROPAGULE PRESSURE, HOWEVER, NO OTHER GENERALLY STRONG DETERMINANT OF INVASION SUCCESS IS KNOWN. ALTHOUGH EVIDENCE HAS ACCUMULATED THAT HUMAN AFFILIATES ( DOMESTICATES, PETS, HUMAN COMMENSALS) ALSO HAVE HIGH INVASION SUCCESS, EXISTING STUDIES DO NOT DISTINGUISH WHETHER THIS SUCCESS CAN BE…	111 RIVER ST, HOBOKEN 07030-5774, NJ USA	NA	JONATHAN.JESCHKE@GMX.NET	NA	NA	NA	2020-10-26	077CM	10.1111/j.1365-2486.2006.01213.x	NA	NA	1365-2486	NA	NA	NA	NA	NA	1354-1013	GLOB. CHANGE BIOL.	GLOBAL CHANGE BIOLOGY	ENGLISH	NA	SEP	NA	66	9	NA	STRAYER, DAVID L/0000-0002-6767-4486 JESCHKE, JONATHAN M/0000-0003-3328-4217	NA	1608-1619	WILEY	BIODIVERSITY \& CONSERVATION; ENVIRONMENTAL SCIENCES \& ECOLOGY	STRAYER, DAVID L/H-3788-2011 JESCHKE, JONATHAN M/A-2707-2008	NA	170	DETERMINANTS OF VERTEBRATE INVASION SUCCESS IN EUROPE AND NORTH AMERICA	ARTICLE	4	103	12	BIODIVERSITY CONSERVATION; ECOLOGY; ENVIRONMENTAL SCIENCES
ISI000240299900006	rejected off topic illegal trade	Ada Sanchez	JOHNSTON HA, 2006, J AVIAN MED SURG	JOHNSTON HA;LINDSTROM JG;OGLESBEE M	COMMUNICATING HYDROCEPHALUS; VITAMIN A; DEFICIENCY; AVIAN; BIRD;; COCKATOO; CACATUA GOFFINI	VITAMIN-A	JOHNSTON, HA (CORRESPONDING AUTHOR), NAT PALM ANIM HOSP, 10076 W INDIANTOWN RD, JUPITER, FL 33478 USA.; NAT PALM ANIM HOSP, JUPITER, FL 33478 USA.; ANIM CLIN N VIEW, N RIDGEVILLE, OH 44039 USA.; OHIO STATE UNIV, DEPT VET BIOSCI, COLUMBUS, OH 43210 USA.	HYDROCEPHALUS IS RARELY DIAGNOSED IN PET BIRDS, AND WHEN IT OCCURS, A CAUSE IS RARELY IDENTIFIED. COMMUNICATING HYDROCEPHALUS IS DESCRIBED IN AN ADULT GOFFIN'S COCKATOO (CACATUA GOFFINI). MARKED CEREBRAL ATROPHY WITHOUT EVIDENCE OF INFLAMMATION WAS OBSERVED GROSSLY AND HISTOLOGICALLY IN THE BIRD IN THIS REPORT. THE SEGMENTALLY HYPERTROPHIED ARACHNOID MEMBRANE PROVIDES A CAUSE FOR THE HYDROCEPHALU…	PO BOX 811720, BOCA RATON, FL 33481 USA	NA	NA	NA	NA	NA	2020-10-26	081EL	10.1647/2004-029R.1	NA	NA	NA	NA	NA	NA	NA	NA	1082-6742	J. AVIAN MED. SURG.	JOURNAL OF AVIAN MEDICINE AND SURGERY	ENGLISH	NA	SEP	NA	15	3	NA	NA	NA	180-184	ASSOC AVIAN VETERINARIANS	VETERINARY SCIENCES	NA	NA	4	COMMUNICATING HYDROCEPHALUS IN A MATURE GOFFIN'S COCKATOO (CACATUA GOFFINI)	ARTICLE	0	1	20	VETERINARY SCIENCES
ISI000242286800006	rejected off topic illegal trade	Ada Sanchez	HUBER L, 2006, ANIM COGN	HUBER L;GAJDON GK	TECHNICAL INTELLIGENCE; SENSORIMOTOR; DEVELOPMENT; SOCIAL LEARNING;; CAUSAL REASONING; INSIGHT	SENSORIMOTOR INTELLIGENCE; OBJECT PERMANENCE; TOOL USE; MANIPULATION;; PARROT; RAVENS; BIRDS; IMITATION; EVOLUTION; COGNITION	HUBER, L (CORRESPONDING AUTHOR), UNIV VIENNA, DEPT BEHAV NEUROBIOL \& COGNIT, ALTHANSTR 14, A-1090 VIENNA, AUSTRIA.; UNIV VIENNA, DEPT BEHAV NEUROBIOL \& COGNIT, A-1090 VIENNA, AUSTRIA.; AUSTRIAN ACAD SCI, KONRAD LORENZ INST ETHOL, A-1010 VIENNA, AUSTRIA.	THE ABILITY TO ACT ON INFORMATION FLEXIBLY IS ONE OF THE CORNERSTONES OF INTELLIGENT BEHAVIOR. AS PARTICULARLY INFORMATIVE EXAMPLE, TOOL-ORIENTED BEHAVIOR HAS BEEN INVESTIGATED TO DETERMINE TO WHICH EXTENT NONHUMAN ANIMALS UNDERSTAND MEANS-END RELATIONS, OBJECT AFFORDANCES, AND HAVE SPECIFIC MOTOR SKILLS. EVEN PLANNING WITH FORESIGHT, GOAL-DIRECTED PROBLEM SOLVING AND IMMEDIATE CAUSAL INFERENCE H…	TIERGARTENSTRASSE 17, D-69121 HEIDELBERG, GERMANY	NA	LUDWIG.HUBER@UNIVIE.AC.AT	NA	NA	NA	2020-10-26	109CZ	10.1007/s10071-006-0033-8	NA	NA	1435-9456	NA	NA	NA	NA	NA	1435-9448	ANIM. COGN.	ANIMAL COGNITION	ENGLISH	NA	OCT	NA	72	4	NA	HUBER, LUDWIG/0000-0002-0217-136X	NA	295-305	SPRINGER HEIDELBERG	BEHAVIORAL SCIENCES; ZOOLOGY	NA	NA	105	TECHNICAL INTELLIGENCE IN ANIMALS: THE KEA MODEL	REVIEW	0	128	9	BEHAVIORAL SCIENCES; ZOOLOGY
ISI000243365400005	rejected off topic	JRFP	COLEMAN RE, 2007, J MED ENTOMOL	COLEMAN RE;BURKETT DA;SHERWOOD V;CACI J;SPRADLING S;JENNINGS BT;ROWTON E;GILMORE W;BLOUNT K;WHITE CE;PUTNAM JL	PHLEBOTOMINE; IRAQ; ECOLOGY; SANDFLY; DISTRIBUTION	VISCERAL LEISHMANIASIS; SANDFLIES DIPTERA; SAUDI-ARABIA; HUMAN-BAIT;; PSYCHODIDAE; VECTOR	COLEMAN, RE (CORRESPONDING AUTHOR), USA, MED LAB 520, TALLIL AIR BASE, IRAQ.; USA, MED LAB 520, TALLIL AIR BASE, IRAQ.; USA, MED DETACHMENT 407, TALLIL AIR BASE, IRAQ.; WALTER REED ARMY INST RES, SILVER SPRING, MD USA.	CDC MINIATURE LIGHT TRAPS WERE USED TO EVALUATE THE GENERAL BIOLOGY OF PHLEBOTOMINE SAND FLIES FROM APRIL 2003 TO NOVEMBER 2004 AT TALLIL AIR BASE, IRAQ. FACTORS EVALUATED INCLUDE SPECIES DIVERSITY AND TEMPORAL (DAILY AND SEASONAL) AND GEOGRAPHIC DISTRIBUTION OF THE SAND FLIES. IN ADDITION, THE ABUNDANCE OF SAND FLIES INSIDE AND OUTSIDE TENTS AND BUILDINGS WAS OBSERVED. IN TOTAL, 61,630 SAND FLIE…	10001 DEREKWOOD LANE, STE 100, LANHAM, MD 20706-4876 USA	NA	RUSSELL.COLEMAN@US.ARMY.MIL	NA	NA	NA	2020-10-26	124JZ	10.1603/0022-2585(2007)44[29:IOPSFO]2.0.CO;2	NA	NA	NA	NA	NA	NA	NA	NA	0022-2585	J. MED. ENTOMOL.	JOURNAL OF MEDICAL ENTOMOLOGY	ENGLISH	NA	JAN	NA	38	1	BRONZE	ROWTON, EDGAR/0000-0002-1979-1485	NA	29-41	ENTOMOLOGICAL SOCIETY AMERICA	ENTOMOLOGY; VETERINARY SCIENCES	ROWTON, EDGAR/A-4474-2012 ROWTON, EDGAR/A-1975-2011	NA	31	IMPACT OF PHLEBOTOMINE SAND FLIES ON US MILITARY OPERATIONS AT TALLIL AIR BASE, IRAQ: 2. TEMPORAL AND GEOGRAPHIC DISTRIBUTION OF SAND FLIES	ARTICLE	0	2	44	ENTOMOLOGY; VETERINARY SCIENCES
ISI000243461100003	rejected off topic illegal trade	Ada Sanchez	CELEBI BS, 2006, AVIAN DIS	CELEBI BS;AK S	CHLAMYDOPHILA PSITTACI; PET BIRDS; POLYMERASE CHAIN REACTION; DIRECT; FLUORESCEIN STAINING; MODIFIED GIMENEZ STAINING	CHLAMYDIA-PSITTACI; INFECTIONS; PCR; SENSITIVITY; DNA	CELEBI, BS (CORRESPONDING AUTHOR), 22 MALVERN ST, WALTHAM, MA 02451 USA.; ISTANBUL UNIV, FAC VET, DEPT MICROBIOL, TR-38451 ISTANBUL, TURKEY.	THIS STUDY, FOR THE FIRST TIME IN TURKEY, INVESTIGATED THE EXISTENCE OF CHLAMYDOPHILA PSITTACI AND DETERMINED THE PREVALENCE OF ITS DISEASE, CHLAMYDIOSIS, IN PET BIRDS. POLYMERASE CHAIN REACTION (PCR) WAS COMPARED WITH OTHER TESTING METHODS THAT HAVE BEEN TYPICALLY USED IN THE DIAGNOSIS OF C PSITTACI. FECAL SPECIMENS (N = 96) OF AVIAN ORIGIN WERE TESTED BY PCR AND TWO IDENTIFICATION METHODS, MODI…	953 COLLEGE STATION RD, ATHENS, GA 30602-4875 USA	NA	NA	NA	NA	NA	2020-10-26	125RW	10.1637/7518-021406R.1	NA	NA	1938-4351	NA	NA	NA	NA	NA	0005-2086	AVIAN DIS.	AVIAN DISEASES	ENGLISH	NA	DEC	NA	39	4	NA	AK, SEYYAL/0000-0002-6687-8401	NA	489-493	AMER ASSOC AVIAN PATHOLOGISTS	VETERINARY SCIENCES	AK, SEYYAL/D-2788-2019	NA	14	A COMPARATIVE STUDY OF DETECTING CHLAMYDOPHILA PSITTACI IN PET BIRDS USING ISOLATION IN EMBRYONATED EGG AND POLYMERASE CHAIN REACTION	ARTICLE	0	6	50	VETERINARY SCIENCES
ISI000244553500003	included in review	Ada Sanchez	COCKLE K, 2007, J FIELD ORNITHOL	COCKLE K;CAPUZZI G;BODRATI A;CLAY R;DEL CASTILLO H;VELAZQUEZ M;ARETA N;FARINA R	AMAZONA VINACEA; ARAUCARIA ANGUSTIFOLIA; ARGENTINA; ATLANTIC FOREST;; CONSERVATION; DISTRIBUTION; PARAGUAY; PARROT; POACHING; VINACEOUS AMAZON	HABITATS; AVIFAUNA; PARROTS; BRAZIL	COCKLE, K (CORRESPONDING AUTHOR), UNIV MAIMONIDES, DEPT CIENCIAS NAT \& ANTROPOL, FDN HIST NAT FELIX DE AZARA, VALENTIN VIRASORO 732,C1405BDB, BUENOS AIRES, DF, ARGENTINA.; UNIV MAIMONIDES, DEPT CIENCIAS NAT \& ANTROPOL, FDN HIST NAT FELIX DE AZARA, BUENOS AIRES, DF, ARGENTINA.; UNIV NACL MISIONES, INST SUPER SAN PEDRO, RA-3352 MISIONES, ARGENTINA.; GUYRA PARAGUAY, CORONEL RAFAEL FRANCO, ASUNCION…	VINACEOUS AMAZONS (AMAZONA VINACEA) ARE ENDEMIC TO THE ATLANTIC FOREST OF SOUTHEASTERN BRAZIL, EASTERN PARAGUAY, AND THE PROVINCE OF MISIONES IN ARGENTINA. WE SEARCHED FOR VINACEOUS AMAZONS THROUGHOUT THE WESTERN PART OF ITS RANGE IN ARGENTINA AND PARAGUAY DURING 1639 DAYS OF FIELDWORK FROM 1997 TO 2006. THESE PARROTS HAVE DISAPPEARED FROM MOST AREAS WHERE THEY WERE HISTORICALLY RECORDED IN THESE…	9600 GARSINGTON RD, OXFORD OX4 2DQ, OXON, ENGLAND	NA	KRISTINACOCKLE@YAHOO.COM.AR	NA	NA	NA	2020-10-26	141CF	10.1111/j.1557-9263.2006.00082.x	NA	NA	NA	NA	NA	NA	NA	NA	0273-8570	J. FIELD ORNITHOL.	JOURNAL OF FIELD ORNITHOLOGY	ENGLISH	NA	WIN	NA	76	1	NA	COCKLE, KRISTINA/0000-0002-6502-923X ARETA, JUAN IGNACIO/0000-0001-8588-3030	NA	21-39	BLACKWELL PUBLISHING	ZOOLOGY	NA	NA	21	DISTRIBUTION, ABUNDANCE, AND CONSERVATION OF VINACEOUS AMAZONS (AMAZONA VINACEA) IN ARGENTINA AND PARAGUAY	ARTICLE	0	26	78	ORNITHOLOGY
ISI000245313300009	rejected off topic illegal trade	Ada Sanchez	MELO M, 2007, MOL ECOL	MELO M;O'RYAN C	CONSERVATION; GENE DUPLICATION; GULF OF GUINEA; INTROGRESSION;; MITOCHONDRIAL DNA; PHYLOGEOGRAPHY; PSITTACUS ERITHACUS	MAXIMUM-LIKELIHOOD-ESTIMATION; MITOCHONDRIAL; EVOLUTION; COALESCENT;; AVES; DIVERSIFICATION; PHYLOGENY; RADIATION; NUCLEAR; GUINEA	MELO, M (CORRESPONDING AUTHOR), UNIV CAPE TOWN, PERCY FITZPATRICK INST, DST CTR EXCELLENCE, PRIVATE BAG, ZA-7701 RONDEBOSCH, SOUTH AFRICA.; UNIV CAPE TOWN, PERCY FITZPATRICK INST, DST CTR EXCELLENCE, ZA-7701 RONDEBOSCH, SOUTH AFRICA.; UNIV EDINBURGH, SCH BIOL SCI, INST EVOLUTIONARY BIOL, EDINBURGH EH9 3JT, MIDLOTHIAN, SCOTLAND.; UNIV CAPE TOWN, DEPT MOL \& CELL BIOL, ZA-7701 RONDEBOSCH, SOUTH AFR…	THE RANGE OF THE GREY PARROT (PSITTACUS ERITHACUS), ONE OF THE MOST HEAVILY HARVESTED BIRD SPECIES FOR THE INTERNATIONAL PET TRADE, SPANS THE FOREST BELT OF CENTRAL AND WEST AFRICA AND INCLUDES THE OCEANIC ISLAND OF PRINCIPE (GULF OF GUINEA). MORPHOLOGICAL VARIATION LED TO THE RECOGNITION OF TWO MAINLAND SUBSPECIES (P. E. ERITHACUS AND P. E. TIMNEH). THE POPULATION FROM PRINCIPE WAS ORIGINALLY DE…	111 RIVER ST, HOBOKEN 07030-5774, NJ USA	NA	MARTIM.MELO@ED.AC.UK	NA	NA	NA	2020-10-26	151TI	10.1111/j.1365-294X.2006.03128.x	NA	NA	1365-294X	NA	NA	NA	NA	NA	0962-1083	MOL. ECOL.	MOLECULAR ECOLOGY	ENGLISH	NA	APR	NA	72	8	NA	MELO, MARTIM/0000-0003-1394-4361	NA	1673-1685	WILEY	BIOCHEMISTRY \& MOLECULAR BIOLOGY; ENVIRONMENTAL SCIENCES \& ECOLOGY; EVOLUTIONARY BIOLOGY	MELO, MARTIM/L-7704-2013	NA	12	GENETIC DIFFERENTIATION BETWEEN PRINCIPE ISLAND AND MAINLAND POPULATIONS OF THE GREY PARROT (PSITTACUS ERITHACUS), AND IMPLICATIONS FOR CONSERVATION	ARTICLE	0	16	16	BIOCHEMISTRY \& MOLECULAR BIOLOGY; ECOLOGY; EVOLUTIONARY BIOLOGY
ISI000245372100002	rejected off topic illegal trade	Ada Sanchez	SCHENKER OA, 2007, AVIAN DIS	SCHENKER OA;HOOP RK	CHLAMYDIA; ATHEROSCLEROSIS; PET BIRD; PCR; IMMUNOHISTOCHEMISTRY	CORONARY-HEART-DISEASE; HELICOBACTER-PYLORI; PNEUMONIAE; INFECTIONS;; IDENTIFICATION; INVOLVEMENT; ARTERIES; PLAQUES; PARROTS; DNA	SCHENKER, OA (CORRESPONDING AUTHOR), UNIV ZURICH, INST VET BACTERIOL, NATL REFERENCE CTR POULTRY \& RABBIT DIS, WINTERTHURERSTR 270, CH-8057 ZURICH, SWITZERLAND.; UNIV ZURICH, INST VET BACTERIOL, NATL REFERENCE CTR POULTRY \& RABBIT DIS, CH-8057 ZURICH, SWITZERLAND.	ATHEROSCLEROSIS IS A COMMON DISEASE IN PET BIRDS, PARTICULARLY IN PSITTACINES. LITTLE IS KNOWN ABOUT THE ROLE OF RISK FACTORS PREDISPOSING BIRDS TO THIS DISEASE. IN OUR STUDY, WE TRIED TO DETECT CHLAMYDIAE IN FORMALIN-FIXED AND PARAFFIN-EMBEDDED ATHEROSCLEROTIC TISSUE FROM 103 PET BIRDS TO CLARIFY THEIR ROLE IN ATHEROSCLEROSIS. METHODS USED WERE POLYMERASE CHAIN REACTION (PCR), SEQUENCING, AND IM…	953 COLLEGE STATION RD, ATHENS, GA 30602-4875 USA	NA	NA	NA	NA	NA	2020-10-26	152OU	10.1637/0005-2086(2007)051[0008:CAACPC]2.0.CO;2	NA	NA	1938-4351	NA	NA	NA	NA	NA	0005-2086	AVIAN DIS.	AVIAN DISEASES	ENGLISH	NA	MAR	NA	25	1	NA	NA	NA	8-13	AMER ASSOC AVIAN PATHOLOGISTS	VETERINARY SCIENCES	NA	NA	11	CHLAMYDIAE AND ATHEROSCLEROSIS: CAN PSITTACINE CASES SUPPORT THE LINK?	ARTICLE	0	5	51	VETERINARY SCIENCES
ISI000246618500018	rejected off topic illegal trade	Ada Sanchez	WOLF P, 2007, J ANIM PHYSIOL ANIM NUTR	WOLF P;HAEBICH AC;BUERKLE M;KAMPHUES J	LORIKEET; NUTRITION; PSITTACINE; ENERGY REQUIREMENT; NUTRIENT; DIGESTIBILITY; FOOD INTAKE	RAINBOW LORIKEETS; HAEMATODUS; NUTRITION; POLLEN; BIRDS; DIET	KAMPHUES, J (CORRESPONDING AUTHOR), UNIV VET MED, INST ANIM NUTR, BISCHOFSHOLER DAMM 15, D-30173 HANNOVER, GERMANY.; UNIV VET MED, INST ANIM NUTR, D-30173 HANNOVER, GERMANY.; LORO PARQUE FDN, TENERIFE, SPAIN.	ALTHOUGH KNOWLEDGE OF THE NUTRIENT REQUIREMENTS OF PET BIRDS HAS INCREASED A LOT OVER THE LAST FEW YEARS, BASIC DATA ON FOOD AND WATER INTAKE AND THE ENERGY REQUIREMENTS OF NECTARIVOROUS SPECIES, SUCH AS LORIKEETS, ARE SCARCE. THUS, THE AIM OF THIS STUDY WAS TO TRY TO GENERATE SOME OF THESE DATA FOR LORIKEETS KEPT AT MAINTENANCE. DETERMINATION OF THE DAILY MAINTENANCE ENERGY REQUIREMENT ENABLES C…	9600 GARSINGTON RD, OXFORD OX4 2DQ, OXON, ENGLAND	NA	JOSEF.KAMPHUES@TIHO-HANNOVER.DE	NA	NA	NA	2020-10-26	169UV	10.1111/j.1439-0396.2007.00706.x	NA	NA	NA	NA	NA	NA	NA	NA	0931-2439	J. ANIM. PHYSIOL. ANIM. NUTR.	JOURNAL OF ANIMAL PHYSIOLOGY AND ANIMAL NUTRITION	ENGLISH	NA	JUN	NA	28	56	NA	NA	NA	282-288	BLACKWELL PUBLISHING	AGRICULTURE; VETERINARY SCIENCES	WOLF, PETRA/B-9567-2017	NA	8	BASIC DATA ON FOOD INTAKE, NUTRIENT DIGESTIBILITY AND ENERGY REQUIREMENTS OF LORIKEETS	ARTICLE	0	19	91	AGRICULTURE, DAIRY \& ANIMAL SCIENCE; VETERINARY SCIENCES
ISI000246622600006	rejected off topic illegal trade	Ada Sanchez	MATUZAK GD, 2007, J FIELD ORNITHOL	MATUZAK GD;BRIGHTSMITH DJ	AMAZONA AUROPALLIATA; COSTA RICA; ISLAND NESTING; PSITTACIDAE; ROOSTING	VARIABILITY; AMAZON; FOREST; DIET; AVAILABILITY; ABUNDANCE; DIALECTS;; PATTERNS; TREES	MATUZAK, GD (CORRESPONDING AUTHOR), USA PARROT CONSERVAT \& RES FUND, AMIGOS AVES, 317 THAMES DR, SLIDELL, LA 70458 USA.; USA PARROT CONSERVAT \& RES FUND, AMIGOS AVES, SLIDELL, LA 70458 USA.; DUKE UNIV, DEPT BIOL, DURHAM, NC 27708 USA.	MANY PARROT POPULATIONS ARE THREATENED WITH EXTINCTION DUE TO HABITAT LOSS AND COLLECTION FOR THE PET TRADE. THE LOSS OF NEST TREES AND CHICK POACHING CAN DRASTICALLY REDUCE REPRODUCTIVE SUCCESS. HOWEVER, DUE TO THE LONG LIFE SPAN OF MANY PARROTS, POPULATIONS ARE UNLIKELY TO BECOME EXTINCT RAPIDLY EVEN WITH COMPLETE REPRODUCTIVE FAILURE. FOR PARROTS THAT TRAVEL IN FAMILY GROUPS, RAPID ESTIMATES O…	9600 GARSINGTON RD, OXFORD OX4 2DQ, OXON, ENGLAND	NA	GMATUZAK@HOTMAIL.COM DBRIGHTSMITH@CVM.TAMU.EDU	NA	NA	NA	2020-10-26	169WK	10.1111/j.1557-9263.2007.00099.x	NA	NA	NA	NA	NA	NA	NA	NA	0273-8570	J. FIELD ORNITHOL.	JOURNAL OF FIELD ORNITHOLOGY	ENGLISH	NA	JUN	NA	46	2	NA	BRIGHTSMITH, DONALD/0000-0002-3306-6490	NA	159-169	BLACKWELL PUBLISHING	ZOOLOGY	NA	NA	16	ROOSTING OF YELLOW-NAPED PARROTS IN COSTA RICA: ESTIMATING THE SIZE AND RECRUITMENT OF THREATENED POPULATIONS	ARTICLE	1	17	78	ORNITHOLOGY
ISI000247322000010	rejected illegal trade circunstancial	Ada Sanchez	MONTERRUBIO-RICO TC, 2007, ORNITOL NEOTROP	MONTERRUBIO-RICO TC;VILLASENOR-GOMEZ LE;CONSUELO;MARIN-TOGO M;LOPEZ-CORDOVA EA;FABIAN-TURJA B;SORANI-DALBON V	YELLOW-HEADED PARROT; AMAZONA ORATRIX; CURRENT DISTRIBUTION; MICHOACAN;; MEXICO	SPINY POCKET MICE; GEOGRAPHIC DISTRIBUTIONS; SIZE	MONTERRUBIO-RICO, TC (CORRESPONDING AUTHOR), UNIV MICHOACANA, FAC BIOL, EDIFICIO R,CIUDAD UNIV, MORELIA 58194, MICHOACAN, MEXICO.; UNIV MICHOACANA, FAC BIOL, MORELIA 58194, MICHOACAN, MEXICO.; UNIV AUTONOMA ESTADO MORELOS, CTR EDUC AMBIENTAL \& INVEST SIERRA HUAUTLA, RED MESOAMER RECURSOS BIOT, CUERNAVACA 62209, MORELOS, MEXICO.	WE EVALUATED THE HISTORICAL AND PRESENT DISTRIBUTION OF THE YELLOW-HEADED PARROT (AMAZONA ORATRIX) ON THE CENTRAL PACIFIC COAST OF MEXICO, IN THE MICHOACAN STATE. HISTORICAL AND RECENT DISTRIBUTION RECORDS WERE ANALYZED WITH A GEOGRAPHIC INFORMATION SYSTEM AND WITH THE GENETIC ALGORITHM FOR RULE-SET PREDICTION (GARP). WE ESTIMATED THE HISTORICAL SPECIES DISTRIBUTION AT 2769 KM(2). WE OVERLAID REC…	UNIV GEORGIA, WARNELL SCH FOREST RESOURCES, ATHENS, GA 30602-2152 USA	NA	TMONTER2002@YAHOO.COM.MX	NA	NA	NA	2020-10-26	179WV	NA	NA	NA	NA	NA	NA	NA	NA	NA	1075-4377	ORNITOL. NEOTROP.	ORNITOLOGIA NEOTROPICAL	SPANISH	NA	NA	NA	35	2	NA	NA	NA	263-276	NEOTROPICAL ORNITHOLOGICAL SOC, USGS PATUXENT WILDLIFE RESEARCH CTR	ZOOLOGY	NA	NA	11	HISTORICAL AND CURRENT DISTRIBUTION OF THE YELLOW-HEADED PARROT (AMAZONA ORATRIX) ON THE CENTRAL PACIFIC COAST OF MEXICO: ADVANTAGES AND LIMITATIONS IN THE USE OF GARP FOR SPECIES UNDER STRONG TRAFFIC PRESSURE	ARTICLE	0	5	18	ORNITHOLOGY
ISI000247670000005	rejected off topic illegal trade	Ada Sanchez	ALIE K, 2007, ANTHROZOOS	ALIE K;DAVIS BW;FIELDING FG	NA	NA	ALIE, K (CORRESPONDING AUTHOR), INT FUND ANIM WELFARE, WILDLIFE \& HABITAT PROGRAM, 31 WORKSHOP RD, S YARMOUTH, MA 02664 USA.; INT FUND ANIM WELFARE, WILDLIFE \& HABITAT PROGRAM, S YARMOUTH, MA 02664 USA.; TUFTS UNIV, SCH VET MED, CTR ANIM \& PUBL POLICY, NORTH GRAFTON, MA USA.; UNIV NACL AUTONOMA MEXICO, FAC MED, MEXICO CITY 04510, DF, MEXICO.; IFAW LATIN AMER, MEXICO CITY, DF, MEXICO.	THIS PAPER REPORTS ON THE FINDINGS OF INTERVIEWS ON ATTITUDES TOWARDS PET CARE WITH 241 HEADS OF HOUSEHOLDS IN ROSEAU, THE CAPITAL OF THE COMMONWEALTH OF DOMINICA. PARROTS AND DOGS WERE THE TWO MOST PREFERRED ANIMALS, AND SNAKES WERE LEAST LIKED; HOWEVER, FEW RESPONDENTS (0.8\%) KEPT PARROTS AS PETS. DOGS WERE KEPT IN 39\% OF HOUSEHOLDS AND CATS IN 28\%. OVER 90\% OF RESPONDENTS THOUGHT THAT ROSE…	2-4 PARK SQUARE, MILTON PARK, ABINGDON OX14 4RN, OXON, ENGLAND	NA	KALIE@IFAW.ORG	NA	NA	NA	2020-10-26	184VF	10.2752/175303707X207936	NA	NA	1753-0377	NA	NA	NA	NA	NA	0892-7936	ANTHROZOOS	ANTHROZOOS	ENGLISH	NA	JUN	NA	19	2	NA	GALINDO, FRANCISCO/0000-0003-2737-6158	NA	143-154	ROUTLEDGE JOURNALS, TAYLOR \& FRANCIS LTD	ANTHROPOLOGY; ENVIRONMENTAL SCIENCES \& ECOLOGY; SOCIOLOGY; VETERINARY SCIENCES	FIELDING, WILLIAM/ABC-2894-2020	NA	16	ATTITUDES TOWARDS DOGS AND OTHER ``PETS'' IN ROSEAU, DOMINICA	ARTICLE	0	10	20	ANTHROPOLOGY; ENVIRONMENTAL STUDIES; SOCIOLOGY; VETERINARY SCIENCES
ISI000247758200029	rejected off topic illegal trade	Ada Sanchez	VANROMPAY D, 2007, EMERG INFECT DIS	VANROMPAY D;HARKINEZHAD T;VAN DE WALLE D;VAN DROOGENBROECK C;VERMINNEN K;LETEN R;MARTEL A;CAUWERTS K	NA	CHLAMYDIA-SUIS; GENOTYPE; OUTBREAK; GENE; PCR	VANROMPAY, D (CORRESPONDING AUTHOR), UNIV GHENT, DEPT MOL BIOTECHNOL, FAC BIOSCI ENGN, B-9000 GHENT, BELGIUM.; UNIV GHENT, DEPT MOL BIOTECHNOL, FAC BIOSCI ENGN, B-9000 GHENT, BELGIUM.; UNIV GHENT, MERELBEKE, BELGIUM.; FED DEPT HLTH FOOD CHAIN SAFETY \& ENVIRONM, BRUSSELS, BELGIUM.	WE STUDIED ZOONOTIC TRANSMISSION OF CHLAMYDOPHILA PSITTACI IN 39 BREEDING FACILITIES FOR PSITTACIFORMES (COCKATOOS, PARROTS, PARAKEETS, LORIES) THAT FREQUENTLY USED ANTIMICROBIAL DRUGS. GENOTYPES A OR E/B WERE DETECTED IN 14.9\% OF HUMANS AT THESE FACILITIES. INFORMATION ON ANTIMICROBIAL DRUG USE IN PSITTACIFORMES AND A C. PSITTACI VACCINE ARE URGENTLY REQUIRED.	ATLANTA, GA 30333 USA	NA	DAISY.VANROMPAY@UGENT.BE	NA	NA	NA	2020-10-26	186DB	10.3201/eid1307.070074	NA	NA	NA	NA	NA	NA	NA	NA	1080-6040	EMERG. INFECT. DIS	EMERGING INFECTIOUS DISEASES	ENGLISH	NA	JUL	NA	13	7	DOAJ GOLD, GREEN PUBLISHED	NA	NA	1108-1110	CENTER DISEASE CONTROL	IMMUNOLOGY; INFECTIOUS DISEASES	MARTEL, AN/D-3713-2014	NA	85	CHLAMYDOPHILA PSITTACI TRANSMISSION FROM PET BIRDS TO HUMANS	ARTICLE	0	8	13	IMMUNOLOGY; INFECTIOUS DISEASES
ISI000248064200001	rejected illegal trade circunstancial	Ada Sanchez	IQBAL MZ, 2007, PAK J ZOOL	IQBAL MZ;MALIK SA;CHAUDHRY AA	LAHORE CANTONMENT; RESIDENT BIRDS; MIGRANT BIRDS; FACTORS AFFECTING; POPULATION	NA	IQBAL, MZ (CORRESPONDING AUTHOR), GOVT COLL, DEPT ZOOL, LAHORE, PAKISTAN.; GOVT COLL, DEPT ZOOL, LAHORE, PAKISTAN.	LAHORE CANTONMENT (LC) IS ONE OF THE OLDEST ESTABLISHMENTS IN LAHORE. LOCATED ABOUT 28 KM NORTHEAST OF LAHORE, IT COVERS ABOUT 8950 HECTARES. KHAIRY DISTRIBUTOR), FED BY (BRB) CANAL PASSES THROUGH THE AREA. THIS AREA HAS MANY MARSH AREAS ALONG THE ROUTE FROM BURKI UPTO BRB CANAL BESIDES RESIDENT BIRDS. A VARIETY OF BIRDS VISIT THE LAHORE CANTONMENT DURING SUMMER AND WINTER SEASONS. THE HABITAT AN…	UNIV PUNJAB, NEW CAMPUS, C/O DEPT ZOOLOGY, LAHORE, PAKISTAN	NA	NA	NA	NA	NA	2020-10-26	190MX	NA	NA	NA	NA	NA	NA	NA	NA	NA	0030-9923	PAK. J. ZOOL.	PAKISTAN JOURNAL OF ZOOLOGY	ENGLISH	NA	NA	NA	21	4	NA	NA	NA	203-214	ZOOLOGICAL SOC PAKISTAN	ZOOLOGY	NA	NA	2	BIRDS OF LAHORE CANTONMENT	ARTICLE	1	7	39	ZOOLOGY
ISI000248300300022	included in review	Ada Sanchez	TAYLOR TD, 2007, CONSERV GENET	TAYLOR TD;PARKIN DT	MICROSATELLITES; PSITTACIFORMES; CUBAN AMAZON; MOLUCCAN COCKATOO	EVOLUTION	TAYLOR, TD (CORRESPONDING AUTHOR), UNIV KWAZULU NATAL, SCH BIOL \& CONSERVAT SCI, PRIVATE BAG X01, ZA-3209 SCOTTSVILLE, SOUTH AFRICA.; UNIV NOTTINGHAM, INST GENET, QUEENS MED CTR, NOTTINGHAM NG7 2UH, ENGLAND.	THE PARROT FAMILY CONSISTS OF APPROXIMATELY 330 SPECIES, MANY OF WHICH ARE ENDANGERED DUE TO HABITAT DESTRUCTION AND ILLEGAL TRADE. MICROSATELLITE MARKERS CAN PROVIDE IMPORTANT TOOLS FOR EXAMINING BOTH CONSERVATION AND FORENSIC ISSUES IN THIS FAMILY, AND THE AVAILABILITY OF ADDITIONAL MARKERS WILL PROVE USEFUL FOR STUDIES OF OTHER SPECIES IN THE PARROT FAMILY. PARROTS HAVE PROVED A DIFFICULT FAMI…	VAN GODEWIJCKSTRAAT 30, 3311 GZ DORDRECHT, NETHERLANDS	NA	TIAWANNATAYLOR@YAHOO.COM	NA	NA	NA	2020-10-26	193UJ	10.1007/s10592-006-9211-0	NA	NA	NA	NA	NA	NA	NA	NA	1566-0621	CONSERV. GENET.	CONSERVATION GENETICS	ENGLISH	NA	AUG	NA	11	4	NA	NA	NA	991-994	SPRINGER	BIODIVERSITY \& CONSERVATION; GENETICS \& HEREDITY	NA	NA	5	CHARACTERISATION OF 13 MICROSATELLITE LOCI FOR THE MOLUCCAN COCKATOO, CACATUA MOLUCCENSIS, AND CUBAN AMAZON, AMAZONA LEUCOCEPHALA, AND THEIR CONSERVATION AND UTILITY IN OTHER PARROT SPECIES (PSITTACIFORMES)	ARTICLE	0	9	8	BIODIVERSITY CONSERVATION; GENETICS \& HEREDITY
ISI000248669100044	rejected illegal trade circunstancial	Ada Sanchez	AMUNO JB, 2007, OSTRICH	AMUNO JB;MASSA R;DRANZOA C	NA	BIRDS; PREFERENCES; DENSITIES; BURU	AMUNO, JB (CORRESPONDING AUTHOR), MAKERERE UNIV, DEPT WILDLIFE \& ANIM RESOURCES MANAGEMENT, POB 7062, KAMPALA, UGANDA.; MAKERERE UNIV, DEPT WILDLIFE \& ANIM RESOURCES MANAGEMENT, KAMPALA, UGANDA.; UNIV MILAN, DEPT ENVIRONM \& LANDSCAPE SCI, I-20126 MILAN, ITALY.	POPULATIONS OF AFRICAN GREY PARROTS ARE THREATENED BY INCREASED FOREST LOSS AND THE PET TRADE. BUDONGO FOREST RESERVE HAS, FOR OVER 60 YEARS, BEEN SUBJECTED TO SELECTIVE LOGGING. MABIRA FOREST RESERVE FACES HUMAN PRESSURES CHARACTERISED BY EXTRACTIVE DISTURBANCES, AND AGRICULTURAL ACTIVITIES WITH INCREASED BOUNDARY SETTLEMENTS. WE ESTIMATED PARROT POPULATIONS USING THE `FOREST LIMITING CIRCUMFERE…	PO BOX 84394, GREENSIDE 2034, SOUTH AFRICA	NA	JBAMUNO@VETMED.MAK.AC.UG	NA	NA	NA	2020-10-26	199AR	10.2989/OSTRICH.2007.78.2.17.97	NA	NA	NA	NA	NA	NA	NA	NA	0030-6525	OSTRICH	OSTRICH	ENGLISH	NA	JUN	11TH PAN-AFRICAN ORNITOLOGICAL CONGRESS, ASSOC AMIS OISEAUX, DJERBA, TUNISIA, NOV 20-25, 2004	22	2	NA	NA	ARNAUD BECHET TOUR VALAT; ASSOC AMIS OISEAUX	225-231	BIRDLIFE SOUTH AFRICA	ZOOLOGY	NA	NA	12	ABUNDANCE, MOVEMENTS AND HABITAT USE BY AFRICAN GREY PARROTS (PSITTACUS ERITHACUS) IN BUDONGO AND MABIRA FOREST RESERVES, UGANDA	ARTICLE; PROCEEDINGS PAPER	1	30	78	ORNITHOLOGY
ISI000251687600006	rejected off topic illegal trade	JRFP	LOWRY H, 2007, WILDL RES	LOWRY H;LILL A	NA	URBAN ENVIRONMENTS; BIRD ASSEMBLAGES; CONSERVATION; HABITAT	LILL, A (CORRESPONDING AUTHOR), SCH BIOL SCI, WILDLIFE ECOL RES GRP, CLAYTON, VIC 3800, AUSTRALIA.; LOWRY, HELENE; LILL, ALAN, SCH BIOL SCI, WILDLIFE ECOL RES GRP, CLAYTON, VIC 3800, AUSTRALIA.; LILL, ALAN, MONASH UNIV, SCH PSYCHOL PSYCHIATRY \& PSYCHOL MED, CLAYTON, VIC 3800, AUSTRALIA.	THE RED-RUMPED PARROT (PSEPHOTUS HAEMATONOTUS), WHICH APPEARS TO BE UNDERGOING RANGE EXPANSION, STARTED COLONISING METROPOLITAN MELBOURNE SIMILAR TO 30 YEARS AGO. THE FACTORS THAT HAVE FACILITATED THIS COLONISATION HAVE NOT BEEN EVALUATED. WE INVESTIGATED ASPECTS OF THE PARROT'S ECOLOGY AT SIX PARKLAND SITES THROUGH LATE AUTUMN AND WINTER 2006 TO ELUCIDATE THESE FACTORS. THE PREDOMINANTLY GROUND-…	150 OXFORD ST, PO BOX 1139, COLLINGWOOD, VICTORIA 3066, AUSTRALIA	NA	ALAN.LILL@SCI.MONASH.EDU.AU	NA	NA	NA	2020-10-26	241WX	10.1071/WR07025	NA	NA	NA	NA	NA	NA	NA	NA	1035-3712	WILDL. RES.	WILDLIFE RESEARCH	ENGLISH	NA	NA	NA	31	8	NA	NA	NA	624-631	CSIRO PUBLISHING	ENVIRONMENTAL SCIENCES \& ECOLOGY; ZOOLOGY	NA	NA	11	ECOLOGICAL FACTORS FACILITATING CITY-DWELLING IN RED-RUMPED PARROTS	ARTICLE	0	22	34	ECOLOGY; ZOOLOGY
ISI000252113600009	included in review	Ada Sanchez	RODRIGUEZ-FERRARO A, 2007, WILSON J ORNITHOL	RODRIGUEZ-FERRARO A;SANZ V	NA	MARGARITA ISLAND	RODRIGUEZ-FERRARO, A (CORRESPONDING AUTHOR), UNIV MISSOURI, DEPT BIOL, R223,1 UNIV BLVD, ST LOUIS, MO 63121 USA.; RODRIGUEZ-FERRARO, ADRIANA; SANZ, VIRGINIA, PROVITA, CARACAS 1041A, VENEZUELA.	THE YELLOW-SHOULDERED PARROT (AMAZONA BARBADENSIS) HAS A DISJUNCT GEOGRAPHICAL DISTRIBUTION AND THE SMALLEST POPULATION OF THE SPECIES INHABITS LA BLANQUILLA ISLAND IN THE SOUTHERN PART OF THE CARIBBEAN SEA. WE CONDUCTED FIELD WORK FROM 1993 TO 1998 TO GATHER INFORMATION ON THE NATURAL HISTORY AND POPULATION STATUS OF THIS PARROT ON LA BLANQUILLA. WE COMPARED THAT INFORMATION WITH SIMILAR DATA GA…	5400 BOSQUE BLVD, STE 680, WACO, TX 76710 USA	NA	ARPPF@UMSL.EDU	NA	NA	NA	2020-10-26	247WP	10.1676/06-028.1	NA	NA	1938-5447	NA	NA	NA	NA	NA	1559-4491	WILSON J. ORNITHOL.	WILSON JOURNAL OF ORNITHOLOGY	ENGLISH	NA	DEC	NA	39	4	NA	NA	NA	602-609	WILSON ORNITHOLOGICAL SOC	ZOOLOGY	NA	NA	9	NATURAL HISTORY AND POPULATION STATUS OF THE YELLOW-SHOULDERED PARROT ON LA BLANQUILLA ISLAND, VENEZUELA	ARTICLE	0	12	119	ORNITHOLOGY
ISI000252387600001	included in review	Ada Sanchez	HERRERA M, 2007, BIRD CONSERV INT	HERRERA M;HENNESSEY B	NA	NA	HENNESSEY, B (CORRESPONDING AUTHOR), ASOCIAC ARMONIA BIRDLIFE BOLIVIA, LOMAS ARENA 400, SANTA CRUZ, BOLIVIA.; HERRERA, MAURICIO; HENNESSEY, BENNETT, ASOCIAC ARMONIA BIRDLIFE BOLIVIA, SANTA CRUZ, BOLIVIA.	WE MONITORED THE ILLEGAL PET TRADE IN LOS POZOS PET MARKET FROM AUGUST 2004 TO JULY 2005. AS INDICATED IN BOLIVIAN LAW, ALL UNAUTHORIZED TRADE IN WILD ANIMAL SPECIES IS ILLEGAL, ESPECIALLY SPECIES CONSIDERED THREATENED BY IUCN. DURING THIS PERIOD, WE RECORDED 7,279 INDIVIDUALS OF 31 PARROT SPECIES, INCLUDING FOUR THREATENED SPECIES, TWO OF WHICH WERE BEING TRANSPORTED FROM BRAZIL THROUGH BOLIVIA …	32 AVENUE OF THE AMERICAS, NEW YORK, NY 10013-2473 USA	NA	ABHENNESSEY@ARMONIA-BO.ORG	NA	NA	NA	2020-10-26	251QD	10.1017/S0959270907000858	NA	NA	NA	NA	NA	NA	NA	NA	0959-2709	BIRD CONSERV. INT.	BIRD CONSERVATION INTERNATIONAL	ENGLISH	NA	DEC	NA	11	4	BRONZE	NA	NA	295-300	CAMBRIDGE UNIV PRESS	BIODIVERSITY \& CONSERVATION; ZOOLOGY	NA	NA	45	QUANTIFYING THE ILLEGAL PARROT TRADE IN SANTA CRUZ DE LA SIERRA, BOLIVIA, WITH EMPHASIS ON THREATENED SPECIES	ARTICLE	1	29	17	BIODIVERSITY CONSERVATION; ORNITHOLOGY
ISI000253286700006	rejected off topic parrots	JRFP	AHANJAN M, 2007, AFR J BIOTECHNOL	AHANJAN M;MOHANA DC;RAVEESHA KA;AZADBAKHT M	PARROTIA PERSICA; ANTIBACTERIAL ACTIVITY; METHANOL EXTRACT; TRADITIONAL; MEDICINE	NATURAL-PRODUCTS; ROOT	RAVEESHA, KA (CORRESPONDING AUTHOR), UNIV MYSORE, DEPT STUDIES BOT \& MICROBIOL, MICROBIOL LAB, MANASAGANGOTRI, MYSORE 570006, KARNATAKA, INDIA.; AHANJAN, MOHAMMAD; MOHANA, D. C.; RAVEESHA, K. A., UNIV MYSORE, DEPT STUDIES BOT \& MICROBIOL, MICROBIOL LAB, MYSORE 570006, KARNATAKA, INDIA.; AZADBAKHT, M., UNIV MAZANDARAN MED SCI, FAC PHARM, SARY, IRAN.	ETHANOL, METHANOL, CHLOROFORM, PETROLEUM ETHER AND AQUEOUS EXTRACTS OF LEAVES OF PARROTIA PERSICA WERE EVALUATED FOR ANTIBACTERIAL ACTIVITY. THE ZONE OF INHIBITION VARIED FROM 13 TO 22 MM. THE HIGHEST INHIBITTION WAS OBTAINED WITH METHANOL AND ETHANOL. CHLOROFORM AND PETROLEUM ETHER EXTRACTS DID NOT SHOW ANY ACTIVITY. THE MINIMAL INHIBITORY CONCENTRATION (MIC) VALUE OF THE METHANOL EXTRACT FOR TH…	P O BOX 5170-00200 NAIROBI, VICTORIA ISLAND, LAGOS 73023, NIGERIA	NA	KARAVEESHA@GMAIL.COM	NA	NA	NA	2020-10-26	264KR	NA	NA	NA	NA	NA	NA	NA	NA	NA	1684-5315	AFR. J. BIOTECHNOL.	AFRICAN JOURNAL OF BIOTECHNOLOGY	ENGLISH	NA	NOV 19	NA	10	22	NA	AHANJAN, MOHAMMAD/0000-0002-7040-513X AZADAKHT, MOHAMMAD/0000-0002-6298-8718	NA	2526-2528	ACADEMIC JOURNALS	BIOTECHNOLOGY \& APPLIED MICROBIOLOGY	AHANJAN, MOHAMMAD/F-6852-2017	NA	5	ANTIBACTERIAL POTENTIAL OF EXTRACTS OF LEAVES OF PARROTIA PERSICA	ARTICLE	0	2	6	BIOTECHNOLOGY \& APPLIED MICROBIOLOGY
ISI000254360200007	included in review	Ada Sanchez	FARIA PJ, 2008, BIODIVERS CONSERV	FARIA PJ;GUEDES NMR;YAMASHITA P;MIYAKI CY	ANODORHYNCHUS HYACINTHINUS; HYACINTH MACAWS; MACAWS; PARROTS;; PSITTACIDAE; GENETIC VARIATION	VOCAL DIALECTS; ARA-MACAO; DISPERSAL; DIVERSITY; INFERENCE; MUTATION;; PARROTS; GROWTH	FARIA, PJ (CORRESPONDING AUTHOR), CARDIFF UNIV, SCH BIOSCI, CARDIFF CF10 3US, WALES.; FARIA, PATRICIA J.; MIYAKI, CRISTINA Y., UNIV SAO PAULO, INST BIOCIENCIAS, DEPT GENET \& BIOL EVOLUT, BR-05508090 SAO PAULO, BRAZIL.; GUEDES, NEIVA M. R., UNIV DESENVOLVIMENTO ESTADO \& REGIAO PANTANAL, PROJETO ARARA AZUL, CAMPO GRANDE, MS, BRAZIL.; YAMASHITA, CARLOS, IBAMA GERENCIA SAO PAULO, SAO PAULO, BRAZIL.…	THE HYACINTH MACAW (ANODORHYNCHUS HYACINTHINUS) IS ONE OF 14 ENDANGERED SPECIES IN THE FAMILY PSITTACIDAE OCCURRING IN BRAZIL, WITH AN ESTIMATED TOTAL POPULATION OF 6,500 SPECIMENS. WE USED NUCLEAR MOLECULAR MARKERS (SINGLE LOCUS MINISATELLITES AND MICROSATELLITES) AND 472 BP OF THE MITOCHONDRIAL DNA CONTROL REGION TO CHARACTERIZE LEVELS OF GENETIC VARIABILITY IN THIS SPECIES AND TO ASSESS THE DE…	VAN GODEWIJCKSTRAAT 30, 3311 GZ DORDRECHT, NETHERLANDS	NA	PATRICIAJFARIA@YAHOO.COM.BR	NA	NA	NA	2020-10-23	279MV	10.1007/s10531-007-9312-1	NA	NA	1572-9710	NA	NA	NA	NA	NA	0960-3115	BIODIVERS. CONSERV.	BIODIVERSITY AND CONSERVATION	ENGLISH	NA	APR	NA	56	4	NA	MIYAKI, CRISTINA YUMI/0000-0002-9708-9202 MIYAKI, CRISTINA/0000-0002-9708-9202	NA	765-779	SPRINGER	BIODIVERSITY \& CONSERVATION; ENVIRONMENTAL SCIENCES \& ECOLOGY	MIYAKI, CRISTINA YUMI/AAB-6097-2020 MIYAKI, CRISTINA/J-2431-2015	NA	17	GENETIC VARIATION AND POPULATION STRUCTURE OF THE ENDANGERED HYACINTH MACAW (ANODORHYNCHUS HYACINTHINUS): IMPLICATIONS FOR CONSERVATION	ARTICLE	0	57	17	BIODIVERSITY CONSERVATION; ECOLOGY; ENVIRONMENTAL SCIENCES
ISI000254697500021	rejected illegal trade circunstancial	Ada Sanchez	CARRARA LA, 2008, REV BRAS ZOOL	CARRARA LA;FARIA LCP;MATOS JR;ANTAS PTZ	ATLANTIC FOREST; CONSERVATION UNITS; FOOD SOURCE	NA	CARRARA, LA (CORRESPONDING AUTHOR), FDN PRO NAT, SCLN 107,BLOCO B,SALA 201, BR-70743520 BRASILIA, DF, BRAZIL.; CARRARA, LUCAS A.; FARIA, LUCIENE C. P.; MATOS, JOSE R.; ANTAS, PAULO DE TARSO Z., FDN PRO NAT, BR-70743520 BRASILIA, DF, BRAZIL.	ENDEMIC OF THE ATLANTIC FOREST, AMAZONA VINACEA (KUHL, 1820) IS LISTED AS ENDANGERED IN BRAZIL AND AT THE INTERNATIONAL LEVEL. LACK OF RECENT REPORTS NORTH OF RIO DE JANEIRO STATE, INCLUDING THE NORTHERN PORTION OF ESPIRITO SANTO STATE (WHERE IT HAD BEEN FOUND PROBABLY TILL 1991) SUGGESTED THE SPECIES HAD VANISHED FROM THIS PART OF THE RANGE. THE PRESENT PAPER REPORTS THE REDISCOVERY OF A VINACEA…	CAIXA POSTAL 19020, CURITIBA, PARANA 81531-980, BRAZIL	NA	LUCASCARRARA@TASKMAIL.COM.BR LUCIENEFARIA@TASKMAI1.COM.BR MATOSROBERTO2004@YAHOO.COM.BR PTZANTAS@ABORDO.COM.BR	NA	NA	NA	2020-10-23	284HM	10.1590/S0101-81752008000100021	NA	NA	NA	NA	NA	NA	NA	NA	0101-8175	REV. BRAS. ZOOL.	REVISTA BRASILEIRA DE ZOOLOGIA	PORTUGUESE	NA	MAR	NA	21	1	DOAJ GOLD	ANTAS, PAULO DE TARSO/0000-0002-8295-6297	NA	154-158	SOC BRASILEIRA ZOOLOGIA, UNIV FEDERAL PARANA	ZOOLOGY	NA	NA	2	VINACEOUS AMAZON AMAZONA VINACEA (KUHL) (AVES : PSITTACIDAE) IN THE NORTHERN REGION OF ESPIRITO SANTO STATE, SOUTHEASTEM BRAZIL: REDISCOVERY AND CONSERVATION	ARTICLE	1	10	25	ZOOLOGY
ISI000254912800027	rejected off topic illegal trade	Ada Sanchez	ABEL EL, 2008, PSYCHOL REP	ABEL EL	NA	NA	ABEL, EL (CORRESPONDING AUTHOR), WAYNE STATE UNIV, DEPT OBSTET \& GYNECOL, CS MOTT CTR HUMAN GROWTH \& DEV, 275 E HANCOCK, DETROIT, MI 48201 USA.; ABEL, ERNEST L., WAYNE STATE UNIV, DEPT OBSTET \& GYNECOL, CS MOTT CTR HUMAN GROWTH \& DEV, DETROIT, MI 48201 USA.; ABEL, ERNEST L., WAYNE STATE UNIV, DEPT PSYCHOL, DETROIT, MI 48202 USA.	ANALYSIS OF AN INTERNET DATABASE OF PETS' NAMES SHOWED OWNERS WERE MORE LIKELY TO GIVE ANTHROPOMORPHIC NAMES TO PETS LIVING WITHIN HOMES THAN THOSE LIVING OUTSIDE.	PO BOX 9229, MISSOULA, MT 59807-9229 USA	NA	EABEL@WAYNE.EDU	NA	NA	NA	2020-10-23	287JG	10.2466/PR0.102.1.271-272	NA	NA	NA	NA	NA	NA	NA	NA	0033-2941	PSYCHOL. REP.	PSYCHOLOGICAL REPORTS	ENGLISH	NA	FEB	NA	2	1	NA	NA	NA	271-272	AMMONS SCIENTIFIC, LTD	PSYCHOLOGY	NA	NA	1	PARROTS ARE ``MORE HUMAN'' THAN CHICKENS'	ARTICLE	1	3	102	PSYCHOLOGY, MULTIDISCIPLINARY
ISI000255294300005	rejected off topic illegal trade	Ada Sanchez	PERPINAN D, 2007, J AVIAN MED SURG	PERPINAN D;FERNANDEZ-BELLON H;LOPEZ C;RAMIS A	PROVENTRICULAR DILATATION DISEASE; LYMPHOPLASMACYTIC MYENTERIC; GANGLIONEURITIS; CANARY; GREENFINCH; UMBRELLABIRD; BARBET;; PASSERIFORMES; PICIFORMES; AVIAN; SERINUS CANARIA; CARDUELIS CHLORIS;; CEPHALOPTERUS PENDULIGER; LYBIUS DUBIUS	NA	PERPINAN, D (CORRESPONDING AUTHOR), OMAHAS HENRY DOORLY ZOO, 3701 S 10TH ST, OMAHA, NE 68107 USA.; RAMIS, ANTON, UNIV AUTONOMA BARCELONA, FAC VET, DEPT MED \& CIRURGIA ANIM, E-08193 BARCELONA, SPAIN.; PERPINAN, DAVID; LOPEZ, CARLOS, MARAGALL EXOT CTR VET, BARCELONA 08041, SPAIN.	A DISEASE CONDITION WITH CLINICAL AND PATHOLOGIC FINDINGS COMPATIBLE WITH PSITTACINE PROVENTRICULAR DILATATION DISEASE WAS DIAGNOSED IN A CANARY (SERINUS CANARIA), A GREENFINCH (CARDUELIS CHLORIS), A LONG-WATTLED UMBRELLABIRD (CEPHALOPTERUS PENDULIGER), AND A BEARDED BARBET (LYBIUS DUBIUS). THE CANARY AND THE GREENFINCH WERE KEPT AS PETS BY DIFFERENT OWNERS, WHEREAS THE BEARDED BARBET AND THE LON…	PO BOX 811720, BOCA RATON, FL 33481 USA	NA	NA	NA	NA	NA	2020-10-26	292VN	10.1647/1082-6742(2007)21[210:LMSAPG]2.0.CO;2	NA	NA	NA	NA	NA	NA	NA	NA	1082-6742	J. AVIAN MED. SURG.	JOURNAL OF AVIAN MEDICINE AND SURGERY	ENGLISH	NA	SEP	NA	5	3	NA	FERNANDEZ-BELLON, HUGO/0000-0001-6071-1435	NA	210-214	ASSOC AVIAN VETERINARIANS	VETERINARY SCIENCES	FERNANDEZ-BELLON, HUGO/M-5925-2019	NA	21	LYMPHOPLASMACYTIC MYENTERIC, SUBEPICARDIAL, AND PULMONARY GANGLIONEURITIS IN FOUR NONPSITTACINE BIRDS	ARTICLE	0	2	21	VETERINARY SCIENCES
ISI000255409100021	included in review	Ada Sanchez	CARRETE M, 2008, FRONT ECOL ENVIRON	CARRETE M;TELLA JL	NA	BLANKET BANS; CONSEQUENCES; BIOLOGY; SUCCESS; PARROTS; COONEY; JEPSON;; NEST	CARRETE, M (CORRESPONDING AUTHOR), CSIC, DEPT CONSERVAT BIOL, ESTAC BIOL DONANA, SEVILLE 41013, SPAIN.; CARRETE, MARTINA; TELLA, JOSE L., CSIC, DEPT CONSERVAT BIOL, ESTAC BIOL DONANA, SEVILLE 41013, SPAIN.	EXOTIC INVASIONS ARE VIEWED AS A MAJOR THREAT TO GLOBAL BIODIVERSITY, BUT PREDICTING POTENTIAL INVADERS IS STILL A DIFFICULT TASK. HERE, WE HIGHLIGHT A HITHERTO UNNOTICED LINK BETWEEN THE INCREASING DEMAND FOR PET BIRDS IN DEVELOPED COUNTRIES AND AVIAN INVASIONS. PARADOXICALLY, IT IS NOT THE MOST COMMON CAGED BIRD SPECIES THAT SEEM TO BE THE MOST SUCCESSFUL INVADERS, BUT THOSE THAT ARE CAUGHT IN …	1707 H ST NW, STE 400, WASHINGTON, DC 20006-3915 USA	NA	MARTINA@EBD.CSIC.ES	NA	NA	NA	2020-10-23	294MC	10.1890/070075	NA	NA	NA	NA	NA	NA	NA	NA	1540-9295	FRONT. ECOL. ENVIRON.	FRONTIERS IN ECOLOGY AND THE ENVIRONMENT	ENGLISH	NA	MAY	NA	32	4	NA	TELLA, JOSE L/0000-0002-3038-7424 CARRETE, MARTINA/0000-0002-0491-2950	NA	207-211	ECOLOGICAL SOC AMER	ENVIRONMENTAL SCIENCES \& ECOLOGY	TELLA, JOSE L/I-3707-2015 CARRETE, MARTINA/D-2618-2017 CARRETE, MARTINA/A-6376-2009	NA	92	WILD-BIRD TRADE AND EXOTIC INVASIONS: A NEW LINK OF CONSERVATION CONCERN?	ARTICLE	1	70	6	ECOLOGY; ENVIRONMENTAL SCIENCES
ISI000255543600006	rejected off topic illegal trade	Ada Sanchez	JOHNSTON MS, 2008, J AVIAN MED SURG	JOHNSTON MS;THODE HP;EHRHART NP	DISTRACTION OSTEOGENESIS; BONE TRANSPORT; TIBIOTARSUS; AVIAN;; YELLOW-NAPED AMAZON PARROT; AMAZONA OCHROCEPHALA AUROPALLIATA	DISTRACTION; FREQUENCY; TUMORS	JOHNSTON, MS (CORRESPONDING AUTHOR), COLORADO STATE UNIV, JAMES L VOSS VET TEACHING HOSP, DEPT CLIN SCI, FT COLLINS, CO 80523 USA.; JOHNSTON, MATTHEW S.; THODE, HENRY P., III; EHRHART, NICOLE P., COLORADO STATE UNIV, JAMES L VOSS VET TEACHING HOSP, DEPT CLIN SCI, FT COLLINS, CO 80523 USA.	A YELLOW-NAPED AMAZON PARROT (AMAZONA OCHROCEPHALA AUROPALLIATA) WAS PRESENTED 5 MONTHS AFTER A TRAUMATIC FRACTURE OF ITS LEFT TIBIOTARSUS. FIXATION OF THE SIMPLE, CLOSED, MIDDIAPHYSEAL FRACTURE WAS ORIGINALLY WITH AN INTRAMEDULLARY PIN AND EXTERNAL COAPTATION WITH A MODIFIED ROBERT-JONES BANDAGE. DURING THE SUBSEQUENT 5 MONTHS, THE BONE BECAME OSTEOPENIC, AND THE MIDDLE THIRD OF THE TIBIOTARSUS …	PO BOX 811720, BOCA RATON, FL 33481 USA	NA	NA	NA	NA	NA	2020-10-23	296LA	10.1647/2007-006R.1	NA	NA	1938-2871	NA	NA	NA	NA	NA	1082-6742	J. AVIAN MED. SURG.	JOURNAL OF AVIAN MEDICINE AND SURGERY	ENGLISH	NA	MAR	NA	16	1	NA	NA	NA	47-56	ASSOC AVIAN VETERINARIANS	VETERINARY SCIENCES	NA	NA	3	BONE TRANSPORT OSTEOGENESIS FOR RECONSTRUCTION OF A BONE DEFECT IN THE TIBIOTARSUS OF A YELLOW-NAPED AMAZON PARROT (AMAZONA OCHROCEPHALA AUROPALLIATA)	ARTICLE	0	2	22	VETERINARY SCIENCES
ISI000255754500021	rejected off topic illegal trade	Ada Sanchez	WESTFAHL C, 2008, J ANIM PHYSIOL ANIM NUTR	WESTFAHL C;WOLF P;KAMPHUES J	ENDOGENOUS LOSSES; PROTEIN REQUIREMENT; MAINTENANCE; PARROT; AMAZONS	DIETARY-PROTEIN; BIRDS; ENZYMES; ENERGY; RAT	KAMPHUES, J (CORRESPONDING AUTHOR), UNIV VET MED, HANNOVER FDN, INST ANIM NUTR, BISCHOFSHOLER DAMM 15, D-30173 HANNOVER, GERMANY.; WESTFAHL, C.; WOLF, P.; KAMPHUES, J., UNIV VET MED, HANNOVER FDN, INST ANIM NUTR, D-30173 HANNOVER, GERMANY.	ESPECIALLY IN OLDER PET BIRDS, AN UNNECESSARY OVERCONSUMPTION OF PROTEIN - PRESUMABLY OCCURRING IN HUMAN CUSTODY - SHOULD BE AVOIDED IN VIEW OF A POTENTIAL DECREASE IN THE EXCRETORY ORGANS' (LIVER, KIDNEY) EFFICIENCY. INEVITABLE NITROGEN (N)-LOSSES ENABLE THE ESTIMATION OF PROTEIN REQUIREMENT FOR MAINTENANCE, BECAUSE THESE LOSSES HAVE AT LEAST TO BE REPLACED TO MAINTAIN N EQUILIBRIUM. TO DETERMIN…	COMMERCE PLACE, 350 MAIN ST, MALDEN 02148, MA USA	NA	JOSEF.KAMPHUES@TIHO-HANNOVER.DE	NA	NA	NA	2020-10-23	299KM	10.1111/j.1439-0396.2008.00814.x	NA	NA	NA	NA	NA	NA	NA	NA	0931-2439	J. ANIM. PHYSIOL. ANIM. NUTR.	JOURNAL OF ANIMAL PHYSIOLOGY AND ANIMAL NUTRITION	ENGLISH	NA	JUN	10TH CONFERENCE OF THE EUROPEAN-SOCIETY-OF-VETERINARY-AND-COMPARATIVE-NUTRITION, NANTES, FRANCE, OCT 05-07, 2006	26	3	NA	NA	EUROPEAN SOC VET COMPARAT NUTR	384-389	WILEY-BLACKWELL	AGRICULTURE; VETERINARY SCIENCES	WOLF, PETRA/B-9567-2017	NA	6	ESTIMATION OF PROTEIN REQUIREMENT FOR MAINTENANCE IN ADULT PARROTS (AMAZONA SPP.) BY DETERMINING INEVITABLE N LOSSES IN EXCRETA	ARTICLE; PROCEEDINGS PAPER	0	15	92	AGRICULTURE, DAIRY \& ANIMAL SCIENCE; VETERINARY SCIENCES
ISI000255842000018	rejected illegal trade circunstancial	JRFP	VALLE SF, 2008, CIENC RURAL	VALLE SF;ALLGAYER MC;PEREIRA RA;GIL BARCELLOS LJ;CAPACCHI HLAVAC NR;FRANCA RT;LOCATELLI ML	ARA ARARAUNA; SERUM BIOCHEMISTRY; CAPTIVITY	CHEMISTRY	VALLE, SD (CORRESPONDING AUTHOR), UNIV PASSO FUNDO, HOSP VET, CURSO MED VET, CAMPUS 1,CP 611, BR-99001970 PASSO FUNDO, RS, BRAZIL.; VALLE, STELLA DE FARIA; GIL BARCELLOS, LEONARDO JOSE; CAPACCHI HLAVAC, NICOLE REGINA; FRANCA, RAQUELI TERESINHA; LOCATELLI, MARCELO LAUXEN, UNIV PASSO FUNDO, HOSP VET, CURSO MED VET, BR-99001970 PASSO FUNDO, RS, BRAZIL.; ALLGAYER, MARIANGELA DA COSTA, UNIV LUTERANA B…	SEVERAL PSITTACINES HAVE BEEN CATALOGED IN BRAZIL, TOTALING NEARLY 80 SPECIES. THE BLUE-AND-YELLOW MACAW (ARA ARARAUNA), THE MOST REPRESENTATIVE SPECIES OF THE PSITTACIFORMES ORDER, LIVES IN THE FOREST AREAS OF DIFFERENT BRAZILIAN REGIONS. IBAMA, BRAZILIAN ENVIRONMENTAL PROTECTION AGENCY, HAS AUTHORIZED THE TRADE OF WILD ANIMALS RAISED IN BREEDING FACILITIES; CONSEQUENTLY, THEIR USE AS HOUSEHOLD …	UNIV FEDERAL SANTA MARIA, SANTA MARIA, RS 97105.9, BRAZIL	NA	STELLAVALLE@UPF.BR	NA	NA	NA	2020-10-23	300RD	10.1590/S0103-84782008000300018	NA	NA	NA	NA	NA	NA	NA	NA	0103-8478	CIENC. RURAL	CIENCIA RURAL	PORTUGUESE	NA	MAY-JUN	NA	17	3	DOAJ GOLD	HLAVAC, NICOLE R. C./0000-0002-2496-2955	NA	711-716	UNIV FEDERAL SANTA MARIA	AGRICULTURE	HLAVAC, NICOLE R. C./J-6283-2018	NA	10	SERUM BIOCHEMICAL PARAMETERS OF HEALTHY MALE, FEMALE AND YOUNG BLUE-AND-YELLOW MACAWS (ARA ARARAUNA) BRED IN CAPTIVITY	ARTICLE	0	12	38	AGRONOMY
ISI000255990700005	included in review	Ada Sanchez	PILLAI SPS, 2008, VET MICROBIOL	PILLAI SPS;SUAREZ DL;PANTIN-JACKWOOD M;LEE CW	H5N2; INFLUENZA; PARROT; PATHOGENICITY; TRANSMISSION	A VIRUSES; HEMAGGLUTININ SUBTYPE; NEWCASTLE-DISEASE; HONG-KONG; GULLS;; EVOLUTION; CHICKENS; DUCKS	LEE, CW (CORRESPONDING AUTHOR), OHIO STATE UNIV, OHIO AGR RES \& DEV CTR, FOOD ANIM HLTH RES PROGRAM, 1680 MADISON AVE, WOOSTER, OH 44691 USA.; PILLAI, S. P. S.; LEE, C. -W., OHIO STATE UNIV, OHIO AGR RES \& DEV CTR, FOOD ANIM HLTH RES PROGRAM, WOOSTER, OH 44691 USA.; PILLAI, S. P. S.; LEE, C. -W., OHIO STATE UNIV, COLL VET MED, DEPT VET PREVENT MED, COLUMBUS, OH 43210 USA.; SUAREZ, D. L.; PANTIN…	IN 2004, A LOW PATHOGENIC H5N2 INFLUENZA VIRUS (A/PARROT/CA/6032/04) WAS IDENTIFIED IN A PSITTACINE BIRD FOR THE FIRST TIME IN THE UNITED STATES. SEQUENCE AND PHYLOGENETIC ANALYSIS OF THE HEMAGGLUTININ GENE GROUPED THE PARROT ISOLATE UNDER THE MEXICAN LINEA-E H5N2 VIRUSES (SUBGROUP B) WITH HIGHEST SIMILARITY TO RECENT CHICKEN-ORIGIN ISOLATES FROM GUATEMALA. ANTIGENIC ANALYSIS FURTHER CONFIRMED TH…	PO BOX 211, 1000 AE AMSTERDAM, NETHERLANDS	NA	LEE.2854@OSU.EDU	NA	NA	NA	2020-10-23	302SX	10.1016/j.vetmic.2007.11.003	NA	NA	NA	NA	NA	NA	NA	NA	0378-1135	VET. MICROBIOL.	VETERINARY MICROBIOLOGY	ENGLISH	NA	MAY 25	NA	27	12	NA	SUAREZ, DAVID/0000-0003-4582-6116 PANTIN-JACKWOOD, MARY J./0000-0003-0414-213X	NA	48-57	ELSEVIER SCIENCE BV	MICROBIOLOGY; VETERINARY SCIENCES	NA	NA	13	PATHOGENICITY AND TRANSMISSION STUDIES OF H5N2 PARROT AVIAN INFLUENZA VIRUS OF MEXICAN LINEAGE IN DIFFERENT POULTRY SPECIES	ARTICLE	0	5	129	MICROBIOLOGY; VETERINARY SCIENCES
ISI000255991900057	included in review	Ada Sanchez	DRIGGERS T, 2007, PROCEEDINGS OF THE ASSOCIATION OF AVIAN VETERINARIANS 28TH ANNUAL CONFERENCE AND EXPO	DRIGGERS T	NA	PARROTS	DRIGGERS, T (CORRESPONDING AUTHOR), AVIAN \& EXOT ANIM CLIN ARIZONA, 530 W ELLIOT RD, GILBERT, AZ 85233 USA.; AVIAN \& EXOT ANIM CLIN ARIZONA, GILBERT, AZ 85233 USA.	ADULT ACUTE ONSET PSITTACINE BEAK AND FEATHER DISEASE (PBFD) HAS NOT BEEN DESCRIBED. THIS CASE REPORT DESCRIBES ACUTE CLINICAL PBFD THAT RESULTED IN THE DEATH OF AN 8-YEAR-OLD AFRICAN GREY (PSITTACUS ERITHACUS ERITHACUS) THAT HAD BEEN RECENTLY EXPOSED AND PRESUMABLY INFECTED BY AN ILLEGALLY IMPORTED GROUP OF 200 INDIAN RINGECKS (PSITTACULA KRAMERI MANILLENSISZ) AND 5 7 KAKARIKIS (CYANORAMPHUS SPE…	PO BOX 210732, BEDFORD, TX 76095 USA	NA	NA	NA	NA	PROCEEDINGS OF THE ASSOCIATION OF AVIAN VETERINARIANS 28TH ANNUAL CONFERENCE AND EXPO	2020-10-26	BHS76	NA	NA	BERGMAN, E	NA	NA	NA	NA	NA	NA	NA	PROCEEDINGS OF THE ASSOCIATION OF AVIAN VETERINARIANS 28TH ANNUAL CONFERENCE AND EXPO	PROCEEDINGS OF THE ASSOCIATION OF AVIAN VETERINARIANS 28TH ANNUAL CONFERENCE AND EXPO	ENGLISH	NA	NA	28TH ANNUAL CONFERENCE AND EXPO WITH THE ASSOCIATION-OF-EXOTIC-MAMMAL-VETERINARIANS, PROVIDENCE, RI, AUG 06-09, 2007	8	NA	NA	NA	ASSOC EXOT MAMMAL VET	317-322	ASSOC AVIAN VETERINARIANS	VETERINARY SCIENCES	NA	NA	0	ACUTE ONSET PBFD IN AN ADULT CONGO AFRICAN GREY	PROCEEDINGS PAPER	0	0	NA	VETERINARY SCIENCES
ISI000255991900062	rejected off topic illegal trade	Ada Sanchez	DOEST O, 2007, PROCEEDINGS OF THE ASSOCIATION OF AVIAN VETERINARIANS 28TH ANNUAL CONFERENCE AND EXPO	DOEST O	NA	NA	DOEST, O (CORRESPONDING AUTHOR), VET PRACTICE DOEST, PARALLELWEG 40, CURACAO, NETH ANTILLES.; VET PRACTICE DOEST, CURACAO, NETH ANTILLES.	AN OVERVIEW OF A UNIQUE OPPORTUNITY TO STUDY MACAWS (ARA AND ANDORHYNCHUS SPECIES) WHILE FORAGING, NESTING, AND FLEDGING IN THE WILD WILL BE PRESENTED AND COMPARED TO COMMON CONCEPTIONS ABOUT MACAWS IN CAPTIVITY. KNOWLEDGE OF THEIR BEHAVIOR, DIET, AND HABITAT IN THE WILD WILL RESULT IN A BETTER UNDERSTANDING OF THE PROBLEMS WE ENCOUNTER IN OUR CLIENTS PETS.	PO BOX 210732, BEDFORD, TX 76095 USA	NA	NA	NA	NA	PROCEEDINGS OF THE ASSOCIATION OF AVIAN VETERINARIANS 28TH ANNUAL CONFERENCE AND EXPO	2020-10-26	BHS76	NA	NA	BERGMAN, E	NA	NA	NA	NA	NA	NA	NA	PROCEEDINGS OF THE ASSOCIATION OF AVIAN VETERINARIANS 28TH ANNUAL CONFERENCE AND EXPO	PROCEEDINGS OF THE ASSOCIATION OF AVIAN VETERINARIANS 28TH ANNUAL CONFERENCE AND EXPO	ENGLISH	NA	NA	28TH ANNUAL CONFERENCE AND EXPO WITH THE ASSOCIATION-OF-EXOTIC-MAMMAL-VETERINARIANS, PROVIDENCE, RI, AUG 06-09, 2007	8	NA	NA	NA	ASSOC EXOT MAMMAL VET	333-339	ASSOC AVIAN VETERINARIANS	VETERINARY SCIENCES	NA	NA	0	MACAWS IN THE WILD	PROCEEDINGS PAPER	0	0	NA	VETERINARY SCIENCES
ISI000255991900066	rejected overview	Ada Sanchez	DOEST O, 2007, PROCEEDINGS OF THE ASSOCIATION OF AVIAN VETERINARIANS 28TH ANNUAL CONFERENCE AND EXPO-a	DOEST O	NA	NA	DOEST, O (CORRESPONDING AUTHOR), VET PRACTICE DOEST, PARALLELWEG 40, CURACAO, NETH ANTILLES.; VET PRACTICE DOEST, CURACAO, NETH ANTILLES.	IN 2002, AN AMNESTY PROGRAM WAS OFFERED IN THE NETHERLANDS ANTILLES FOR OWNERS OF ILLEGAL PET PARROTS TO REGISTER ALL CITES I BIRDS. SINCE THAT TIME, THE NUMBER OF ILLEGAL UNREGISTERED PETS PRESENTED TO OUR PRACTICE HAS DECREASED, BUT UNREGISTERED BIRDS ARE STILL BROUGHT IN. YET, THE PROGRAM DID HAVE AN EFFECT ON THE ILLEGAL PET TRADE, AS EVIDENCED BY THE DECREASE IN SMUGGLED PSITTACINES PRESENTE…	PO BOX 210732, BEDFORD, TX 76095 USA	NA	NA	NA	NA	PROCEEDINGS OF THE ASSOCIATION OF AVIAN VETERINARIANS 28TH ANNUAL CONFERENCE AND EXPO	2020-10-26	BHS76	NA	NA	BERGMAN, E	NA	NA	NA	NA	NA	NA	NA	PROCEEDINGS OF THE ASSOCIATION OF AVIAN VETERINARIANS 28TH ANNUAL CONFERENCE AND EXPO	PROCEEDINGS OF THE ASSOCIATION OF AVIAN VETERINARIANS 28TH ANNUAL CONFERENCE AND EXPO	ENGLISH	NA	NA	28TH ANNUAL CONFERENCE AND EXPO WITH THE ASSOCIATION-OF-EXOTIC-MAMMAL-VETERINARIANS, PROVIDENCE, RI, AUG 06-09, 2007	5	NA	NA	NA	ASSOC EXOT MAMMAL VET	361-366	ASSOC AVIAN VETERINARIANS	VETERINARY SCIENCES	NA	NA	0	ABDUCTED FROM THE WILD: ILLEGAL PET, ILLEGAL VET?	PROCEEDINGS PAPER	0	0	NA	VETERINARY SCIENCES
ISI000256158100008	rejected off topic illegal trade	Ada Sanchez	PLAIR BL, 2008, ORNITOL NEOTROP	PLAIR BL;KUCHINSKI K;RYAN S;PILGRIM K;BOODOO D;RAMSUBAGE S;RAMADHAR A;LAL M;RAMPAUL B;MOHAMMED N	BEHAVIOR; BONDED PAIRS; SOCIAL GROUPS; SURVIVAL; REINTRODUCTION; ARA; ARARAUNA; BLUE-AND-YELLOW MACAW; TRINIDAD	PARROTS; SURVIVAL; FOREST; TRANSLOCATION	PLAIR, BL (CORRESPONDING AUTHOR), CINCINNATI ZOO \& BOTAN GARDEN, 3400 VINE ST, CINCINNATI, OH 45220 USA.; PLAIR, BERNADETTE L., CINCINNATI ZOO \& BOTAN GARDEN, CINCINNATI, OH 45220 USA.; KUCHINSKI, KRISTINE, FLORIDA AVIAN ADVISORS, GAINESVILLE, FL 32641 USA.; RYAN, JOSEPH; WARREN, SELENE, MINIST AGR LAND \& MARINE RESOURCES, PORT OF SPAIN, TRINIDAD TOBAGO.; PILGRIM, KAREN, DURBAN BACKLANDS, CENT…	THE BLUE-AND-YELLOW MACAW (ARA ARARAUNA), ONCE NATIVE TO THE ISLAND OF TRINIDAD, WAS EXTIRPATED IN THE EARLY 1960'S, PRIMARILY DUE TO NEST POACHING FOR THE PET TRADE. BETWEEN 1999 AND 2004, THE CINCINNATI ZOO AND BOTANICAL GARDEN, TRINIDAD'S MINISTRY OF ENVIRONMENT AND THE CENTRE FOR THE RESCUE OF ENDANGERED SPECIES OF TRINIDAD AND TOBAGO (CRESTT) TRANSLOCATED WILD-CAUGHT BIRDS FROM GUYANA TO TRI…	UNIV GEORGIA, WARNELL SCH FOREST RESOURCES, ATHENS, GA 30602-2152 USA	NA	BERNADETTE.PLAIR@CINCINNATIZOO.ORG	NA	NA	NA	2020-10-23	305DN	NA	NA	NA	NA	NA	NA	NA	NA	NA	1075-4377	ORNITOL. NEOTROP.	ORNITOLOGIA NEOTROPICAL	ENGLISH	NA	NA	8TH NEOTROPICAL ORNITHOLOGICAL CONGRESS, MATURIN, VENEZUELA, MAY 13-19, 2007	29	NA	NA	NA	NA	113-122	NEOTROPICAL ORNITHOLOGICAL SOC, USGS PATUXENT WILDLIFE RESEARCH CTR	ZOOLOGY	NA	NA	1	BEHAVIORAL MONITORING, OF BLUE-AND-YELLOW MACAWS (ARA ARARAUNA) REINTRODUCED TO THE NARIVA SWAMP, TRINIDAD	ARTICLE; PROCEEDINGS PAPER	0	47	19	ORNITHOLOGY
ISI000256158100010	included in review	Ada Sanchez	KOENIG SE, 2008, ORNITOL NEOTROP	KOENIG SE	AMAZONA AGILIS; BLACK-BILLED PARROT; POPULATION VIABILITY ASSESSMENT;; PVA; BAUXITE MINING	SURVIVAL; EXPERIENCE; MODELS	KOENIG, SE (CORRESPONDING AUTHOR), WINDSOR RES CTR, TRELAWNY, JAMAICA.; WINDSOR RES CTR, TRELAWNY, JAMAICA.	POPULATION VIABILITY ASSESSMENT (PVA) IS AN IMPORTANT CONSERVATION TOOL FOR ENDANGERED SPECIES MANAGEMENT. THE STRENGTH OF PVA IS IDENTIFYING CRITICAL STAGES OF A SPECIES',LIFE CYCLE AND EVALUATING RELATIVE DIFFERENCES AMONG MANAGEMENT OPTIONS. NOTABLY, IT ENABLES MANAGERS TO DEMONSTRATE GRAPHICALLY TO DECISION MAKERS THE CONSEQUENCES OF UNSUSTAINABLE PRACTICES. PVA WAS APPLIED TO. BLACK-BILLED P…	UNIV GEORGIA, WARNELL SCH FOREST RESOURCES, ATHENS, GA 30602-2152 USA	NA	WINDSOR@CWJAMAICA.COM	NA	NA	NA	2020-10-23	305DN	NA	NA	NA	NA	NA	NA	NA	NA	NA	1075-4377	ORNITOL. NEOTROP.	ORNITOLOGIA NEOTROPICAL	ENGLISH	NA	NA	8TH NEOTROPICAL ORNITHOLOGICAL CONGRESS, MATURIN, VENEZUELA, MAY 13-19, 2007	32	NA	NA	NA	NA	135-149	NEOTROPICAL ORNITHOLOGICAL SOC, USGS PATUXENT WILDLIFE RESEARCH CTR	ZOOLOGY	NA	NA	3	BLACK-BILLED PARROT (AMAZONA AGILIS) POPULATION VIABILITY ASSESSMENT (PVA): A SCIENCE-BASED PREDICTION FOR POLICY MAKERS	ARTICLE; PROCEEDINGS PAPER	0	6	19	ORNITHOLOGY
ISI000256158100014	included in review	Ada Sanchez	KLEMANN L, 2008, ORNITOL NEOTROP	KLEMANN L;NETO PS;MONTEIRO TV;RAMOS FM;DE ALMEIDA R	AMAZONA RHODOCORYTHA; RED-BROWED PARROT; RELATIVE ABUNDANCE; HABITAT; CONDITIONS; CONSERVATION; ESPIRITO SANTO; BRAZIL	NA	KLEMANN, L (CORRESPONDING AUTHOR), INST PESQUISA \& CONSERVACAO NATUREZA IDEIA AMBIEN, BAIRRO CTR CIV, RUA EUCLIDES BANDEIRA 1635, CURITIBA, PARANA, BRAZIL.; KLEMANN, LOURI, JR.; MONTEIRO, TIAGO VENANCIO; RAMOS, FERNANDO MATSUNO; DE ALMEIDA, RODRIGO, INST PESQUISA \& CONSERVACAO NATUREZA IDEIA AMBIEN, BAIRRO CTR CIV, CURITIBA, PARANA, BRAZIL.; NETO, PEDRO SCHERER, MUSEU HIST NAT CAPAO IMBUIA, CUR…	THE RED-BROWED PARROT (AMAZONA RHODOCORYTHA), AN ENDEMIC SPECIES OF THE TROPICAL ATLANTIC COASTAL FOREST OF SOUTHEASTERN BRAZIL, IS GLOBALLY THREATENED AND LISTED AS ENDANGERED BY BIRDLIFE INTERNATIONAL, THE WORLD CONSERVATION UNION, AND THE MINISTRY OF ENVIRONMENT OF BRAZIL. THE AVAILABLE INFORMATION ON THIS SPECIES IS FROM OLD PAPERS AND REGIONAL BIRD INVENTORIES. OUR RESEARCH GOALS WERE TO EST…	UNIV GEORGIA, WARNELL SCH FOREST RESOURCES, ATHENS, GA 30602-2152 USA	NA	LOURI@IDEIAAMBIENTAL.ORG.BR PEDROSCHERERNETO@YAHOO.COM.BR TUCANO@IDEIAAMBIENTAL.ORG.BR	NA	NA	NA	2020-10-23	305DN	NA	NA	NA	NA	NA	NA	NA	NA	NA	1075-4377	ORNITOL. NEOTROP.	ORNITOLOGIA NEOTROPICAL	PORTUGUESE	NA	NA	8TH NEOTROPICAL ORNITHOLOGICAL CONGRESS, MATURIN, VENEZUELA, MAY 13-19, 2007	19	NA	NA	NA	NA	183-196	NEOTROPICAL ORNITHOLOGICAL SOC, USGS PATUXENT WILDLIFE RESEARCH CTR	ZOOLOGY	NA	NA	1	MAPPING THE DISTRIBUTION AND CONSERVATION OF THE RED-BROWED PARROT (AMAZONA RHODOCORYTHA) IN THE ESPIRITO SANTO STATE, BRAZIL	ARTICLE; PROCEEDINGS PAPER	0	6	19	ORNITHOLOGY
ISI000258367500046	rejected off topic illegal trade	Ada Sanchez	BRUNO SF, 2008, CIENC RURAL	BRUNO SF;ALVES DE ALBUQUERQUE DD	KNEMIDOCOPTIC MANGE; KNEMIDOKOPTES SP; BIRDS COMPANY	INTERMEDIUS	BRUNO, SF (CORRESPONDING AUTHOR), UNIV FED FLUMINENSE, DEPT PATOL \& CLIN VET, SETOR ANIMAIS SELVAGENS, RUA VITAL BRAZIL FILHO 64, BR-24230340 NITEROI, RJ, BRAZIL.; BRUNO, SAVIO FREIRE, UNIV FED FLUMINENSE, DEPT PATOL \& CLIN VET, SETOR ANIMAIS SELVAGENS, BR-24230340 NITEROI, RJ, BRAZIL.; ALVES DE ALBUQUERQUE, DANIELA DUARTE, UNIV FED FLUMINENSE, PROGRAMA POSGRADUACAO CLIN \& REPRODUCAO ANIM, FAC…	KNEMIDOCOPTIC MANGE CAUSED BY KNEMIDOKOPTES SP. CAN HE CONSIDERED AN IMPORTANT DISEASE IN THE BIRDS. THE PURPOSE OF THIS PAPER IS TO DESCRIBE THE OCCURRENCE AND TREATMENTS OF PET BIRDS CARED AT THE WILD ANIMALS SECTOR OF THE VETERINARY MEDICINE COLLEGE - UNIVERSIDADE FEDERAL FLUMINENSE, WITH EMPHASIS ON THE SPECIES MOST COMMONLY AFFECTED AND THE EFFICIENCY OF ITS TREATMENT. BETWEEN JANUARY 2000 A…	UNIV FEDERAL SANTA MARIA, SANTA MARIA, RS 97105.9, BRAZIL	NA	SAVIOBRUNO@VM.UFF.BR	NA	NA	NA	2020-10-23	336MH	10.1590/S0103-84782008000500046	NA	NA	NA	NA	NA	NA	NA	NA	0103-8478	CIENC. RURAL	CIENCIA RURAL	PORTUGUESE	NA	AUG	NA	15	5	DOAJ GOLD	NA	NA	1472-1475	UNIV FEDERAL SANTA MARIA	AGRICULTURE	NA	NA	0	OCCURRENCE AND TREATMENT OF KNEMIDOCOPTIC MANGE (KNEMIDOKOPTES SP.) IN PET BIRDS COMPANY CARED AT THE VETERINARY MEDICINE COLLEGE - UNIVERSIDADE FEDERAL FLUMINENSE, RJ, BRAZIL	ARTICLE	0	4	38	AGRONOMY
ISI000258550900002	rejected off topic illegal trade	Ada Sanchez	RUSSELLO MA, 2008, BMC EVOL BIOL	RUSSELLO MA;AVERY ML;WRIGHT TF	NA	MITOCHONDRIAL-DNA; CONTROL REGION; BIRDS; PSITTACIFORMES; HAPLOTYPES;; STRATEGIES; EVOLUTION; PARROTS; FUTURE	RUSSELLO, MA (CORRESPONDING AUTHOR), UNIV BRITISH COLUMBIA OKANAGAN, DEPT BIOL \& PHYS GEOG, KELOWNA, BC V1V 1V7, CANADA.; RUSSELLO, MICHAEL A., UNIV BRITISH COLUMBIA OKANAGAN, DEPT BIOL \& PHYS GEOG, KELOWNA, BC V1V 1V7, CANADA.; RUSSELLO, MICHAEL A., UNIV BRITISH COLUMBIA OKANAGAN, CTR SPECIES RISK \& HABITAT STUDIES, KELOWNA, BC V1V 1V7, CANADA.; AVERY, MICHAEL L., WILDLIFE SERV, USDA, NATL WI…	BACKGROUND: SEVERE ECOLOGICAL AND ECONOMIC IMPACTS CAUSED BY SOME INVASIVE SPECIES MAKE IT IMPERATIVE TO UNDERSTAND THE ATTRIBUTES THAT PERMIT THEM TO SPREAD. A NOTORIOUS CROP PEST ACROSS ITS NATIVE RANGE IN SOUTH AMERICA, THE MONK PARAKEET (MYIOPSITTA MONACHUS) HAS BECOME ESTABLISHED ON FOUR OTHER CONTINENTS, INCLUDING GROWING POPULATIONS IN THE UNITED STATES. AS A CRITICAL FIRST STEP TO STUDYIN…	236 GRAYS INN RD, FLOOR 6, LONDON WC1X 8HL, ENGLAND	217	MICHAEL.RUSSELLO@UBC.CA MICHAEL.L.AVERY@APHIS.USDA.GOV WRIGHT@NMSU.EDU	NA	NA	NA	2020-10-23	339AQ	10.1186/1471-2148-8-217	NA	NA	NA	NA	NA	AMERICAN PHILOSOPHICAL SOCIETY; UBC OKANAGAN	THIS WORK WAS FUNDED BY AN AMERICAN PHILOSOPHICAL SOCIETY GRANT TO MR. WE THANK THE AMERICAN MUSEUM OF NATURAL HISTORY FOR GRANTING ACCESS TO THEIR COLLECTIONS AND P. SWEET FOR HIS ASSISTANCE SAMPLING THE SPECIMENS. J. EBERHARD PROVIDED FIELD-COLLECTED SAMPLES FROM ARGENTINA AND OFFERED HELPFUL COMMENTS ON THE MANUSCRIPT. J. WRIGHT, D. HOFFMEIER, AND J. LINDSAY WITH FLORIDA POWER AND LIGHT COMPAN…	NA	1471-2148	BMC EVOL. BIOL.	BMC EVOLUTIONARY BIOLOGY	ENGLISH	NA	JUL 24	NA	57	NA	DOAJ GOLD, GREEN PUBLISHED	NA	NA	NA	BIOMED CENTRAL LTD	EVOLUTIONARY BIOLOGY; GENETICS \& HEREDITY	NA	NA	33	GENETIC EVIDENCE LINKS INVASIVE MONK PARAKEET POPULATIONS IN THE UNITED STATES TO THE INTERNATIONAL PET TRADE	ARTICLE	0	27	8	EVOLUTIONARY BIOLOGY; GENETICS \& HEREDITY
ISI000259301200004	rejected off topic illegal trade	Ada Sanchez	DALLIMER M, 2008, AFR J ECOL	DALLIMER M;KING T	AVIFAUNA; DISTANCE SAMPLING; ENDEMIC BIRD AREA; GLOBALLY THREATENED;; HABITAT ASSOCIATION; OCEANIC ISLAND	PARROT PSITTACUS-ERITHACUS; BIODIVERSITY; CONSERVATION; PLANTATIONS	DALLIMER, M (CORRESPONDING AUTHOR), UNIV SHEFFIELD, DEPT ANIM \& PLANT SCI, BIODIVERS \& MACROECOL GRP BIOME, SHEFFIELD S10 2TN, S YORKSHIRE, ENGLAND.; DALLIMER, MARTIN, UNIV EDINBURGH, INST EVOLUTIONARY BIOL, ASHWORTH LABS, EDINBURGH EH9 3JT, MIDLOTHIAN, SCOTLAND.; KING, TONY, JOHN ASPINALL FDN, PROJET PROTECT GORILLES, BRAZZAVILLE, REP CONGO.	THE FORESTS OF SOUTHWEST PRINCIPE ARE RECOGNIZED AS IMPORTANT FOR BIODIVERSITY CONSERVATION. HERE, WE STUDY THE DISTRIBUTION AND DENSITY OF FIFTEEN OF THE ISLAND'S ENDEMIC BIRD SPECIES (INCLUDING THREE GLOBALLY THREATENED AND ONE NEAR-THREATENED) WITHIN THE NATIONAL PARK. THE ENDEMIC SUBSPECIES OF THE NEAR-THREATENED GULF OF GUINEA THRUSH OCCURRED AT A DENSITY OF 0.08 BIRDS HA(-1), WHICH IS FAR L…	111 RIVER ST, HOBOKEN 07030-5774, NJ USA	NA	M.DALLIMER@SHEFFIELD.AC.UK	NA	NA	NA	2020-10-23	349RO	10.1111/j.1365-2028.2007.00891.x	NA	NA	1365-2028	NA	NA	DAVIS EXPEDITION FUND; BRITISH ECOLOGICAL SOCIETY; JOHN RAY TRUST; GARMIN (EUROPE) LTD; BERGHAUS LTD	WE THANK THE STAFF OF ECOFAC SAO TOME AND PRINCIPE FOR THEIR HELP IN CARRYING OUT THE FIELDWORK. PEDRO NOBRE HELPED WITH CONTACTS ON PRINCIPE, AND MANUEL BORGE JIANA WAS OUR INDISPENSABLE GUIDE IN THE SOUTHERN FORESTS. WE ALSO THANK RACHEL ATKINSON, ANGUS GASCOIGNE, PETER JONES. ROB SMALLSHIRE AND GORDON BROWN FOR HELP IN PLANNING THE STUDY. ZOE DAVIES AND PETER JONES PROVIDED USEFUL DISCUSSIONS …	NA	0141-6707	AFR. J. ECOL.	AFRICAN JOURNAL OF ECOLOGY	ENGLISH	NA	SEP	NA	36	3	BRONZE	DALLIMER, MARTIN/0000-0001-8120-3309 KING, TONY/0000-0003-4597-0134	NA	258-266	WILEY	ENVIRONMENTAL SCIENCES \& ECOLOGY	DALLIMER, MARTIN/I-1547-2019	NA	7	HABITAT PREFERENCES OF THE FOREST BIRDS ON THE ISLAND OF PRINCIPE, GULF OF GUINEA	ARTICLE	0	19	46	ECOLOGY
ISI000259379600018	rejected off topic parrots	JRFP	DEMARTINI EE, 2008, MAR ECOL -PROG SER	DEMARTINI EE;FRIEDLANDER AM;SANDIN E	APEX PREDATION; FISHERIES EXTRACTION; PREY BODY SIZE DISTRIBUTION;; INVERTED BIOMASS PYRAMID; LATITUDINAL GRADIENT; UPWELLING; BODY SIZE AT; SEX CHANGE; PARROTFISHES	CORAL-REEF-FISH; BODY-SIZE; MORTALITY; PREDATOR; BIOMASS; DENSITY;; GROWTH; INDICATORS; ABUNDANCE; CASCADES	DEMARTINI, EE (CORRESPONDING AUTHOR), NOAA, FISHERIES SERV, PACIFIC ISL FISHERIES SCI CTR, 2570 DOLE ST, HONOLULU, HI 96822 USA.; DEMARTINI, EDWARD E., NOAA, FISHERIES SERV, PACIFIC ISL FISHERIES SCI CTR, HONOLULU, HI 96822 USA.; FRIEDLANDER, ALAN M., NOAA, NATL OCEAN SERV, NATL CTR COASTAL OCEAN SCI, BIOGEOG BRANCH, WAIMANALO, HI 96795 USA.; FRIEDLANDER, ALAN M., OCEAN INST, WAIMANALO, HI 96795 …	WE DESCRIBE THE ABUNDANCE, BIOMASS, SIZE COMPOSITION, AND TROPHIC STRUCTURE OF FISH ASSEMBLAGES OF SHALLOW (10 M DEPTH) FORE REEF HABITATS AT 2 US PACIFIC ATOLLS (KINGMAN, PALMYRA) AND 2 KIRIBATI-OWNED ATOLLS (TABUAERAN, KIRITIMATI) IN THE NORTHERN LINE ISLANDS. OUR CHARACTERIZATION SPANS SEVERAL COINCIDENT GRADIENTS (IN HUMAN HABITATION AND EXPLOITATION, LATITUDE, AND NUTRIENT UPWELLING) FROM UN…	NORDBUNTE 23, D-21385 OLDENDORF LUHE, GERMANY	NA	EDWARD.DEMARTINI@NOAA.GOV	NA	NA	NA	2020-10-23	350UU	10.3354/meps07501	NA	NA	1616-1599	NA	NA	MOORE FAMILY FOUNDATION; FAIRWEATHER FOUNDATION; NATIONAL GEOGRAPHIC SOCIETYNATIONAL GEOGRAPHIC SOCIETY; CONSERVATION INTERNATIONAL; NOAA OFFICE OF HABITAT CONSERVATIONNATIONAL OCEANIC ATMOSPHERIC ADMIN (NOAA) - USA; CORAL REEF ECOSYSTEM DIVISION OF THE PACIFIC ISLANDS FISHERIES SCIENCE CENTER (PIC); NOAA FISHERIESNATIONAL OCEANIC ATMOSPHERIC ADMIN (NOAA) - USA; US FISH AND WILDLIFE SERVICEUS FIS…	THIS RESEARCH WAS SUPPORTED BY THE MOORE FAMILY FOUNDATION, THE FAIRWEATHER FOUNDATION, NATIONAL GEOGRAPHIC SOCIETY, CONSERVATION INTERNATIONAL, E. SCRIPPS, J. GAYLER, AND SEVERAL PRIVATE DONORS. E.E.D. THANKS THE NOAA OFFICE OF HABITAT CONSERVATION AND THE CORAL REEF ECOSYSTEM DIVISION OF THE PACIFIC ISLANDS FISHERIES SCIENCE CENTER (PIC) FOR GENERAL SUPPORT AND GRATEFULLY ACKNOWLEDGES TRAVEL FU…	NA	0171-8630	MAR. ECOL.-PROG. SER.	MARINE ECOLOGY PROGRESS SERIES	ENGLISH	NA	NA	NA	52	NA	BRONZE	NA	NA	199-215	INTER-RESEARCH	ENVIRONMENTAL SCIENCES \& ECOLOGY; MARINE \& FRESHWATER BIOLOGY; OCEANOGRAPHY	NA	NA	143	DIFFERENCES IN FISH-ASSEMBLAGE STRUCTURE BETWEEN FISHED AND UNFISHED ATOLLS IN THE NORTHERN LINE ISLANDS, CENTRAL PACIFIC	ARTICLE	1	67	365	ECOLOGY; MARINE \& FRESHWATER BIOLOGY; OCEANOGRAPHY
ISI000259417000019	rejected off topic illegal trade	Ada Sanchez	JANSSON DS, 2008, J ZOO WILDL MED	JANSSON DS;BROJER C;MATTSSON R;MORNER T;AF SEGERSTAD CH	GAME BIRD; GRAY PARTRIDGE; MACRORHABDUS ORNITHOGASTER; MEGABACTERIUM;; PERDIX PERDIX; PROVENTRICULITIS	BUDGERIGARS MELOPSITTACUS-UNDULATUS; MACRORHABDUS-ORNITHOGASTER;; RESPIRATORY-DISEASE; MEGABACTERIUM; INFECTIONS; PHEASANTS; CANARIES	JANSSON, DS (CORRESPONDING AUTHOR), NATL VET INST SVA, DEPT PIGS POULTRY \& RUMINANTS, SE-75189 UPPSALA, SWEDEN.; JANSSON, DESIREE S., NATL VET INST SVA, DEPT PIGS POULTRY \& RUMINANTS, SE-75189 UPPSALA, SWEDEN.; JANSSON, DESIREE S.; BROJER, CAROLINE; MATTSSON, ROLAND; MORNER, TORSTEN, NATL VET INST SVA, DEPT WILDLIFE FISH \& ENVIRONM, SE-75189 UPPSALA, SWEDEN.; FEINSTEIN, RICARDO; AF SEGERSTAD, …	PROVENTRICULITIS AND CHRONIC RESPIRATORY DISEASE WERE DIAGNOSED IN TWO FLOCKS OF GRAY PARTRIDGES (PERDIX PERDIX) ON UNRELATED SWEDISH GAME BIRD FARMS. AFFECTED BIRDS SHOWED LOSS OF CONDITION, RESPIRATORY SIGNS, AND FLOCK MORTALITY RATES OF 50 AND 98\%, RESPECTIVELY. THE PROVENTRICULAR LESIONS WERE ASSOCIATED CLOSELY WITH FUNGAL ORGANISMS THAT WERE MICROSCOPICALLY INDISTINGUISHABLE FROM THE ASCOMY…	581705 WHITE OAK ROAD, YULEE, FL 32097 USA	NA	DESIREE.S.JANSSON@SVA.SE	NA	NA	NA	2020-10-23	351ID	10.1638/2007-0176.1	NA	NA	NA	NA	NA	NA	NA	NA	1042-7260	J. ZOO WILDL. MED.	JOURNAL OF ZOO AND WILDLIFE MEDICINE	ENGLISH	NA	SEP	NA	23	3	NA	NA	NA	428-437	AMER ASSOC ZOO VETERINARIANS	VETERINARY SCIENCES	NA	NA	7	MYCOTIC PROVENTRICULITIS IN GRAY PARTRIDGES (PERDIX PERDIX) ON TWO GAME BIRD FARMS	ARTICLE	0	9	39	VETERINARY SCIENCES
ISI000259998201052	rejected off topic parrots	Ada Sanchez	HECKMANN M, 2008, 2008 IEEE/RSJ INTERNATIONAL CONFERENCE ON ROBOTS AND INTELLIGENT SYSTEMS, VOLS 1-3, CONFERENCE PROCEEDINGS	HECKMANN M;GLAESER C;VAZ M;RODEMANN T;JOUBLIN F;GOERICK C	NA	NA	HECKMANN, M (CORRESPONDING AUTHOR), HONDA RES INST EUROPE GMBH, D-63073 OFFENBACH, GERMANY.; HECKMANN, MARTIN; GLAESER, CLAUDIUS; RODEMANN, TOBIAS; JOUBLIN, FRANK; GOERICK, CHRISTIAN, HONDA RES INST EUROPE GMBH, D-63073 OFFENBACH, GERMANY.; VAZ, MIGUEL, UNIV MINHO, DEPT IND ELECTRON, P-4719 BRAGA, PORTUGAL.	WE PRESENT A SYSTEM FOR ONLINE EXTRACTION OF THE FUNDAMENTAL FREQUENCY AND THE FIRST FOUR FORMANT FREQUENCIES FROM A SPEECH SIGNAL. IN ORDER TO EVALUATE THE PERFORMANCE OF THE EXTRACTION A RESYNTHESIS OF THE SPEECH SIGNAL IS PERFORMED. THE RESYNTHESIS IS BASED ON THE EXTRACTED FREQUENCIES AND THE ENERGY OF THE INPUT SIGNAL AT THE FORMANT LOCATIONS. THE EXTRACTION OF THE FUNDAMENTAL FREQUENCY AND …	345 E 47TH ST, NEW YORK, NY 10017 USA	NA	MARTIN.HECKMANN@HONDA-RI.DE CLAUDIUS.GLASER@HONDA-RI.DE MVAZ@DEI.UMINHO.PT TOBIAS.RODEMANN@HONDA-RI.DE FRANK.JOUBLIN@HONDA-RI.DE CHRISTIAN.GOERICK@HONDA-RI.DE	NA	NA	2008 IEEE/RSJ INTERNATIONAL CONFERENCE ON ROBOTS AND INTELLIGENT SYSTEMS, VOLS 1-3, CONFERENCE PROCEEDINGS	2020-10-23	BIJ26	10.1109/IROS.2008.4650923	NA	CHATILA, R AND KELLY, A AND MERLET, JP	NA	NA	NA	NA	NA	978-1-4244-2057-5	NA	2008 IEEE/RSJ INTERNATIONAL CONFERENCE ON ROBOTS AND INTELLIGENT SYSTEMS, VOLS 1-3, CONFERENCE PROCEEDINGS	2008 IEEE/RSJ INTERNATIONAL CONFERENCE ON ROBOTS AND INTELLIGENT SYSTEMS, VOLS 1-3, CONFERENCE PROCEEDINGS	ENGLISH	NA	NA	IEEE/RSJ INTERNATIONAL CONFERENCE ON INTELLIGENT ROBOTS AND SYSTEMS, NICE, FRANCE, SEP 22-26, 2008	16	NA	NA	HECKMANN, MARTIN/0000-0002-1794-1160	IEEE; ROBOT SOC JAPAN; IEEE ROBOT \& AUTOMAT SOC; IEEE IND ELECT SOC; SOC INSTRUMENT \& CONTROL ENGINEERS; INST NATL RECH INFORMAT \& AUTOMAT; CNRS; INST CONTROL, ROBOT \& SYST	1699	IEEE	COMPUTER SCIENCE; ENGINEERING; ROBOTICS	HECKMANN, MARTIN/Z-4611-2019	NA	0	LISTEN TO THE PARROT: DEMONSTRATING THE QUALITY OF ONLINE PITCH AND FORMANT EXTRACTION VIA FEATURE-BASED RESYNTHESIS	PROCEEDINGS PAPER	0	0	NA	COMPUTER SCIENCE, ARTIFICIAL INTELLIGENCE; COMPUTER SCIENCE, CYBERNETICS; COMPUTER SCIENCE, THEORY \& METHODS; ENGINEERING, ELECTRICAL \& ELECTRONIC; ROBOTICS
ISI000260227100025	rejected illegal trade circunstancial	Ada Sanchez	LEITE KCE, 2008, GENET MOL RES	LEITE KCE;SEIXAS GHF;BERKUNSKY I;COLLEVATTI RG;CAPARROZ R	AMAZONA AESTIVA; MICROSATELLITE; GENETIC STRUCTURE; BOTTLENECK;; CONSERVATION	ST-VINCENT PARROT; ALLELE FREQUENCIES; BIOGEOGRAPHY; BOTTLENECKS;; PHYLOGENY; DIFFERENTIATION; PSITTACIFORMES; OCHROCEPHALA; GUILDINGII;; DISTANCE	CAPARROZ, R (CORRESPONDING AUTHOR), UNIV CATOLICA BRASILIA, POSGRADUACAO CIENCIAS GENOM \& BIOTECNOL, BRASILIA, DF, BRAZIL.; LEITE, K. C. E.; COLLEVATTI, R. G.; CAPARROZ, R., UNIV CATOLICA BRASILIA, POSGRADUACAO CIENCIAS GENOM \& BIOTECNOL, BRASILIA, DF, BRAZIL.; BERKUNSKY, I., UNIV BUENOS AIRES, FAC CIENCIAS EXACTAS \& NAT, BUENOS AIRES, DF, ARGENTINA.; SEIXAS, G. H. F., FUNDACAO NEOTROP BRASIL,…	THE BLUE-FRONTED AMAZON (AMAZONA AESTIVA) IS A WIDELY DISTRIBUTED NEOTROPICAL PARROT AND ONE OF THE MOST CAPTURED PARROTS IN NATURE TO SUPPLY THE ILLEGAL TRADE OF WILD ANIMALS. THE OBJECTIVES OF THE PRESENT STUDY WERE TO ANALYZE THE GENETIC STRUCTURE OF A. AESTIVA TO IDENTIFY MANAGEMENT UNITS AND SUPPORT CONSERVATION PLANNING AND TO VERIFIED IF A. AESTIVA POPULATIONS HAVE UNDERGONE A RECENT BOTTL…	RUA FLORIANO PEIXOTO 2444, ALTO DA BOA VISTA, RIBEIRAO PRETO, SP 00000, BRAZIL	NA	RENATOCZ@YAHOO.COM.BR	NA	NA	NA	2020-10-23	362WE	10.4238/vol7-3gmr474	NA	NA	NA	NA	NA	NA	NA	NA	1676-5680	GENET. MOL. RES.	GENETICS AND MOLECULAR RESEARCH	ENGLISH	NA	NA	NA	52	3	BRONZE	COLLEVATTI, ROSANE/0000-0002-3733-7059 BERKUNSKY, IGOR/0000-0001-9219-4241	NA	819-829	FUNPEC-EDITORA	BIOCHEMISTRY \& MOLECULAR BIOLOGY; GENETICS \& HEREDITY	COLLEVATTI, ROSANE/D-8673-2013 BERKUNSKY, IGOR/AAS-4517-2020 MULDER, KELLY/C-3185-2015	NA	4	POPULATION GENETIC STRUCTURE OF THE BLUE-FRONTED AMAZON (AMAZONA AESTIVA, PSITTACIDAE: AVES) BASED ON NUCLEAR MICROSATELLITE LOCI: IMPLICATIONS FOR CONSERVATION	ARTICLE	0	16	7	BIOCHEMISTRY \& MOLECULAR BIOLOGY; GENETICS \& HEREDITY
ISI000260732000001	rejected off topic illegal trade	Ada Sanchez	RODRIGUEZ-FERRARO A, 2008, CONDOR	RODRIGUEZ-FERRARO A;BLAKE JG	ARID ZONE BIRDS; BIRD DIVERSITY; COMMUNITY COMPOSITION; DISTANCE; SAMPLING; VENEZUELA	SPECIES RICHNESS; MONTE DESERT; LAND BIRDS; CONSERVATION; ABUNDANCE;; COMMUNITY; FOREST; SIMILARITY; PARROT; GUILDS	RODRIGUEZ-FERRARO, A (CORRESPONDING AUTHOR), UNIV MISSOURI, DEPT BIOL, RES BLDG 223,1 UNIV BLVD, ST LOUIS, MO 63121 USA.; RODRIGUEZ-FERRARO, ADRIANA; BLAKE, JOHN G., UNIV MISSOURI, DEPT BIOL, ST LOUIS, MO 63121 USA.	IN NORTHERN VENEZUELA, AND ZONES ARE REPRESENTED BY ISOLATED AREAS, WHICH ARE IMPORTANT FROM AN ORNITHOLOGICAL PERSPECTIVE BECAUSE OF THE OCCURRENCE OF RESTRICTED-RANGE BIRDS, WHICH DEPEND EXCLUSIVELY ON ARID SCRUB FOR THEIR SURVIVAL. FROM SEPTEMBER 2004 TO AUGUST 2005, BIRD SURVEYS WERE CONDUCTED BIMONTHLY USING DISTANCE SAMPLING AT POINT COUNTS IN SIX AREAS OF NORTHERN VENEZUELA, WHICH DIFFER I…	JOURNALS DEPT, 2001 EVANS RD, CARY, NC 27513 USA	NA	ARPPF@UMSL.EDU	NA	NA	NA	2020-10-23	369ZI	10.1525/cond.2008.8521	NA	NA	1938-5129	NA	NA	WILDLIFE CONSERVATION SOCIETY; NEOTROPICAL BIRD CLUB; CLEVELAND METROPARKS ZOO; RUFFORD MAURICE LAING FOUNDATION	AR-F IS ESPECIALLY GRATEFUL TO D. RODRIGUEZ, A. AZPIROZ, L. OVIOL, R. MONCADA, C. AZPURUA, A. SPECS, V. SANZ, J. C. OTEYZA, I. GALLO, P. CHALELA, F. ENCINAS, A. TEJEDA, A. MEDINA, A. SILVA, AND A. RODRIGUEZ, FOR FIELD ASSISTANCE AND FOR THEIR CONTRIBUTION TO DATA COLLECTION. THANKS TO A. AZPIROZ, B. LOISELLE, R. E. RICKLEFS, C. BOSQUE, M. LENTINO, J. NASSAR, V. SANZ, G. MARIN, N. GARCIA, FUNDO DA…	NA	0010-5422	CONDOR	CONDOR	ENGLISH	NA	AUG	NA	62	3	NA	NA	NA	405-420	OXFORD UNIV PRESS INC	ZOOLOGY	NA	NA	10	DIVERSITY PATTERNS OF BIRD ASSEMBLAGES IN ARID ZONES OF NORTHERN VENEZUELA	ARTICLE	0	8	110	ORNITHOLOGY
ISI000261094700005	rejected off topic illegal trade	Ada Sanchez	SCHMIDT V, 2008, AVIAN PATHOL	SCHMIDT V;SCHNEIDER S;SCHLOEMER ME;RICHTER E	NA	MACAW ARA-CHLOROPTERA; MYCOBACTERIUM-TUBERCULOSIS; AMAZONA-AESTIVA;; INFECTION	SCHMIDT, V (CORRESPONDING AUTHOR), UNIV LEIPZIG, CLIN BIRDS \& REPTILES, FAC VET MED, TIERKLINIKEN 17, D-04103 LEIPZIG, GERMANY.; SCHMIDT, VOLKER; SCHNEIDER, SUSANNE; SCHLOEMER, JULIAN; KRAUTWALD-JUNGHANNS, MARIA-ELISABETH, UNIV LEIPZIG, CLIN BIRDS \& REPTILES, FAC VET MED, D-04103 LEIPZIG, GERMANY.; RICHTER, ELVIRA, RES CTR BORSTEL, NATL REFERENCE CTR MYCOBACTERIA, D-23845 BORSTEL, GERMANY.	THE PRESENT REPORT DESCRIBES A CASE OF MYCOBACTERIUM TUBERCULOSIS INFECTION IN AN AFRICAN GREY PARROT (PSITTACUS ERITHACUS ERITHACUS) KEPT AS A PET BIRD. DIAGNOSIS WAS CONFIRMED BY MICROBIOLOGIC AND PATHOLOGIC RESULTS, AND INDICATED A HUMAN-AVIAN TRANSMISSION. CLINICAL SIGNS INCLUDED SUBLINGUAL NODULES RESULTING IN ANOREXIA AND SIGNS OF OSTEOLYSIS IN THE LONG BONES. PROLIFERATION CONSISTED OF SEV…	4 PARK SQUARE, MILTON PARK, ABINGDON OX14 4RN, OXON, ENGLAND	PII 903088635	VSCHMIDT@VOGELKLINIK.UNI-LEIPZIG.DE	NA	NA	NA	2020-10-23	375DT	10.1080/03079450802428901	NA	NA	NA	NA	NA	NA	NA	NA	0307-9457	AVIAN PATHOL.	AVIAN PATHOLOGY	ENGLISH	NA	NA	NA	13	6	NA	SCHMIDT, VOLKER/0000-0002-6001-9542	NA	589-592	TAYLOR \& FRANCIS LTD	VETERINARY SCIENCES	SCHMIDT, VOLKER/I-7708-2019	NA	26	TRANSMISSION OF TUBERCULOSIS BETWEEN MEN AND PET BIRDS: A CASE REPORT	ARTICLE	1	3	37	VETERINARY SCIENCES
ISI000261581200008	rejected off topic parrots	Ada Sanchez	FRANCINI-FILHO RB, 2008, AQUAT CONSERV -MAR FRESHW ECOSYST	FRANCINI-FILHO RB;DE MOURA RL	MARINE PROTECTED AREAS; REEF FISH; FISHERIES; NO-TAKE RESERVES;; COMMUNITY-BASED MANAGEMENT; DEEP REEFS; ABROLHOS BANK	MARINE PROTECTED AREAS; RESERVES; BIOMASS; SEDIMENTATION; COMMUNITIES;; POPULATIONS; PATTERNS; RECOVERY; BENEFITS; DECLINE	FRANCINI, RB (CORRESPONDING AUTHOR), RUA PALMEIRAS 451, BR-45900000 CARAVELAS, BA, BRAZIL.; FRANCINI-FILHO, RONALDO BASTOS, UNIV FED BAHIA, GRP PESQUISAS RECIFES CORAIS \& MUDANCAS GLOBAIS, BR-40210340 SALVADOR, BA, BRAZIL.; FRANCINI-FILHO, RONALDO BASTOS; DE MOURA, RODRIGO LEAO, CONSERVAT INT BRAZIL, MARINE PROGRAM, BR-45900000 CARAVELAS, BA, BRAZIL.	1. MARINE PROTECTED AREAS (MPAS) RANGE FROM MULTIPLE-USE AREAS (MUA) TO ABSOLUTE NO-TAKE RESERVES (NTR). DESPITE THEIR IMPORTANCE FOR FISHERIES MANAGEMENT, THERE ARE FEW LONG-TERM STUDIES COMPARING BENEFITS FROM DIFFERENT TYPES OF MPAS WITHIN THE SAME REGION. 2. FISH ASSEMBLAGES WERE MONITORED FOR FIVE YEARS (2001-2005) IN THE LARGEST CORAL REEFS IN THE SOUTH ATLANTIC (ABROLHOS BANK, BRAZIL). MON…	111 RIVER ST, HOBOKEN 07030-5774, NJ USA	NA	ROFILHO@YAHOO.COM	NA	NA	NA	2020-10-23	382BY	10.1002/aqc.966	NA	NA	1099-0755	NA	NA	NA	NA	NA	1052-7613	AQUAT. CONSERV.-MAR. FRESHW. ECOSYST.	AQUATIC CONSERVATION-MARINE AND FRESHWATER ECOSYSTEMS	ENGLISH	NA	NOV-DEC	NA	56	7	NA	DE MOURA, RODRIGO LEAO/0000-0002-5597-6196 FRANCINI-FILHO, RONALDO/0000-0002-7678-6797	NA	1166-1179	WILEY	ENVIRONMENTAL SCIENCES \& ECOLOGY; MARINE \& FRESHWATER BIOLOGY; WATER RESOURCES	DE MOURA, RODRIGO LEAO/AAL-5781-2020 FRANCINI-FILHO, RONALDO/I-5708-2012	NA	94	DYNAMICS OF FISH ASSEMBLAGES ON CORAL REEFS SUBJECTED TO DIFFERENT MANAGEMENT REGIMES IN THE ABROLHOS BANK, EASTERN BRAZIL	ARTICLE	0	29	18	ENVIRONMENTAL SCIENCES; MARINE \& FRESHWATER BIOLOGY; WATER RESOURCES
ISI000261797300002	rejected off topic illegal trade	Ada Sanchez	KUMMERFELD N, 2008, PRAKT TIERARZT	KUMMERFELD N;KOBALL D;KIETZMANN M	BIRDS; INTOXICATION; LEAD; ZINC; ANTIDOTE; DTPA	NA	KUMMERFELD, N (CORRESPONDING AUTHOR), TIERARZTLICHE HSCH HANNOVER, KLIN HEIMTIERE, BISCHOFSHOLER DAMM 15, D-30173 HANNOVER, GERMANY.; KUMMERFELD, N.; KOBALL, D., UNIV VET MED HANNOVER, KLIN HEIMTIERE, HANNOVER, GERMANY.; KIETZMANN, M., UNIV VET MED HANNOVER, INST PHARMAKOL, HANNOVER, GERMANY.	FOR MANY YEARS POISONING IN PET BIRDS CAUSED BY LEAD OR ZINC ARE A COMMON PROBLEM IN CAPTIVE BIRDS AND A LOT OF CASES HAVE BEEN REPORTED. HEAVY METAL INTOXICATIONS ARE MAINLY CAUSED BY LEAD FROM DRAPERIES OR CRAFTS OR ``NEW WIRES''. BESIDES PROTECTION OF THE BIRDS FROM THOSE SOURCES FOR PROPHYLAXIS, THERAPY IS OF GREAT IMPORTANCE. SINCE EDTA IS NOT AVAILABLE AS A COMMERCIAL DRUG ANY LONGER, A STU…	HANS-BOCKLER-ALLEE 7, 30173 HANNOVER, GERMANY	NA	NORBERT.KUMMERFELD@TIHO-HANNOVER.DE	NA	NA	NA	2020-10-23	385EW	NA	NA	NA	NA	NA	NA	NA	NA	NA	0032-681X	PRAKT TIERARZT	PRAKTISCHE TIERARZT	GERMAN	NA	DEC 1	NA	17	12	NA	NA	NA	990	SCHLUETERSCHE VERLAGSGESELLSCHAFT MBH \& CO KG	VETERINARY SCIENCES	NA	NA	2	INTOXICATIONS BY LEAD OR ZINC IN BIRDS - CLINICAL AND DIAGNOSTICAL ASPECTS IN TWO TIMELESS INTOXICATIONS AND A NEW ANTIDOTE DTPA (DITRIPENTAT - HEYL)	ARTICLE	0	7	89	VETERINARY SCIENCES
ISI000264540300026	rejected off topic illegal trade	Ada Sanchez	BRISCOE JA, 2009, JAVMA-J AM VET MED ASSOC	BRISCOE JA;MORRIS DO;ROSENTHAL FS;RANKIN SC	NA	BACTERIAL-FLORA; HEALTHY CATS; NASAL CAVITY; INTERMEDIUS; STRAINS; DOGS;; BIRDS; SKIN; IDENTIFICATION; PREVALENCE	BRISCOE, JA (CORRESPONDING AUTHOR), UNIV PENN, SCH VET MED, DEPT CLIN STUDIES PHILADELPHIA, PHILADELPHIA, PA 19104 USA.; BRISCOE, JELEEN A.; MORRIS, DANIEL O.; ROSENTHAL, KAREN L.; SHOFER, FRANCES S., UNIV PENN, SCH VET MED, DEPT CLIN STUDIES PHILADELPHIA, PHILADELPHIA, PA 19104 USA.; RANKIN, SHELLEY C., UNIV PENN, SCH VET MED, DEPT PATHOBIOL, PHILADELPHIA, PA 19104 USA.	OBJECTIVE-TO SURVEY 2 POPULATIONS OF PSITTACINES TO CHARACTERIZE STAPHYLOCOCCUS SPP ISOLATED FROM COMMENSAL CUTANEOUS MICROFLORA. DESIGN-PROSPECTIVE CROSS-SECTIONAL STUDY. ANIMALS-107 PSITTACINE BIRDS FROM A SANCTUARY AND 73 PSITTACINE BIRDS IN PRIVATE HOUSEHOLDS OR A PET STORE. PROCEDURES-GRAM-POSITIVE, CATALASE-POSITIVE COCCI ISOLATED FROM MUCOSAL AND SEBORRHEIC SITES WERE SPECIATED, AND PULSED…	1931 N MEACHAM RD SUITE 100, SCHAUMBURG, IL 60173-4360 USA	NA	NA	NA	NA	NA	2020-10-23	424BK	10.2460/javma.234.7.901	NA	NA	1943-569X	NA	NA	NA	NA	NA	0003-1488	JAVMA-J. AM. VET. MED. ASSOC.	JAVMA-JOURNAL OF THE AMERICAN VETERINARY MEDICAL ASSOCIATION	ENGLISH	NA	APR 1	22ND ANNUAL MEETING OF THE NORTH-AMERICAN-VETERINARY-DERMATOLOGY-FORUM, KAUAI, HI, 2007	40	7	NA	NA	N AMER VET DERMATOL FORUM	901-905	AMER VETERINARY MEDICAL ASSOC	VETERINARY SCIENCES	NA	NA	9	EVALUATION OF MUCOSAL AND SEBORRHEIC SITES FOR STAPHYLOCOCCI IN TWO POPULATIONS OF CAPTIVE PSITTACINES	ARTICLE; PROCEEDINGS PAPER	0	3	234	VETERINARY SCIENCES
ISI000264956100010	included in review	Ada Sanchez	ZAGER I, 2009, ORNITOL NEOTROP	ZAGER I;RODRIGUEZ-CLARK KM;EBERHARD JR;RODRIGUEZ JP;MILLAN PA	ARATINGA PERTINAX; BROWN-THROATED PARAKEET; LA TORTUGA ISLAND; MARGARITA; ISLAND; NEST POACHING; NESTING SITE	YELLOW-SHOULDERED PARROT; MARGARITA ISLAND; SIZE	ZAGER, I (CORRESPONDING AUTHOR), INST VENEZOLANO INVEST CIENT, CTR ECOL, LAB ECOL \& GENET POBLAC, APARTADO 20632, CARACAS 1020A, VENEZUELA.; ZAGER, IRENE; RODRIGUEZ-CLARK, KATHRYN M.; EBERHARD, JESSICA R., INST VENEZOLANO INVEST CIENT, CTR ECOL, LAB ECOL \& GENET POBLAC, CARACAS 1020A, VENEZUELA.; ZAGER, IRENE; RODRIGUEZ, JON PAUL; MILLAN, PABLO A., PROVITA, CARACAS 1041A, VENEZUELA.; EBERHARD, …	THE BROWN-THROATED PARAKEET HAS BEEN LONG SUSPECTED TO BE IN DECLINE ON THE VENEZUELAN ISLANDS OF MARGARITA AND LA TORTUGA, DUE TO POACHING OF NESTLINGS FOR THE ILLEGAL PET TRADE, AND TO RESULTING NEST DESTRUCTION. THEREFORE, WE ASSESSED THE STATUS OF THE TWO:SUBSPECIES INVOLVED, ARATINGA PERTINAX MARGARITENSIS AND A. P. TORTUGUENSIS, AND EXAMINED THE THREAT PRESENTED BY NEST POACHING. DURING FIE…	UNIV GEORGIA, WARNELL SCH FOREST RESOURCES, ATHENS, GA 30602-2152 USA	NA	KMRC@IVIC.VE	NA	NA	NA	2020-10-23	429YN	NA	NA	NA	NA	NA	NA	WHITLEY LAING FOUNDATION; US NATIONAL SCIENCE FOUNDATION/THE AMERICAN ASSOCIATION FOR THE ADVANCEMENT OF SCIENCE (AAAS)NATIONAL SCIENCE FOUNDATION (NSF); LINCOLN PARK ZOO FIELD CONSERVATION FUND; INSTITUTO VENEZOLANO DE INVESTIGACIONES CIENTIFICAS.(IVIC)	FUNDING FOR THIS STUDY CAME FROM A RUFFORD MASTER'S SCHOLARSHIP FROM THE WHITLEY LAING FOUNDATION, THE WOMEN'S INTERNATIONAL SCIENCE COLLABORATION PROGRAM OF THE US NATIONAL SCIENCE FOUNDATION/THE AMERICAN ASSOCIATION FOR THE ADVANCEMENT OF SCIENCE (AAAS), THE LINCOLN PARK ZOO FIELD CONSERVATION FUND, AND THE INSTITUTO VENEZOLANO DE INVESTIGACIONES CIENTIFICAS.(IVIC). WE ARE GRATEFUL TO J. SALAZA…	NA	1075-4377	ORNITOL. NEOTROP.	ORNITOLOGIA NEOTROPICAL	ENGLISH	NA	NA	NA	41	1	NA	RODRIGUEZ, JON PAUL/0000-0001-5019-2870 RODRIGUEZ-CLARK, KATHRYN/0000-0002-1356-9998	NA	99-112	NEOTROPICAL ORNITHOLOGICAL SOC, USGS PATUXENT WILDLIFE RESEARCH CTR	ZOOLOGY	RODRIGUEZ, JON PAUL/A-1491-2009	NA	3	NEST POACHING IN THE VENEZUELAN INSULAR SUBSPECIES OF THE BROWN-THROATED PARAKEET (ARATINGA PERTINAX)	ARTICLE	1	10	20	ORNITHOLOGY
ISI000266465200010	rejected off topic illegal trade	Ada Sanchez	GEBHARDT KJ, 2009, J FIELD ORNITHOL	GEBHARDT KJ;BRIGHTSMITH D;POWELL G;WAITS LP	AMAZON RAINFOREST; DNA AMPLIFICATION SUCCESS; DNA EXTRACTION; GENOTYPING; ERRORS; MOLTED FEATHERS; PARROT; PLUCKED FEATHERS	NONINVASIVE GENETIC-ANALYSIS; FECAL DNA; POPULATION-GENETICS; EXTRACTION; METHOD; SHED FEATHERS; SAMPLES; EAGLE; IDENTIFICATION; AMPLIFICATION;; CONSERVATION	GEBHARDT, KJ (CORRESPONDING AUTHOR), UNIV IDAHO, DEPT FISH \& WILDLIFE RESOURCES, CNR 105, 6TH \& LINE ST, MOSCOW, ID 83844 USA.; GEBHARDT, KARA J.; WAITS, LISETTE P., UNIV IDAHO, DEPT FISH \& WILDLIFE RESOURCES, CNR 105, MOSCOW, ID 83844 USA.; BRIGHTSMITH, DONALD, DUKE UNIV, DEPT BIOL, DURHAM, NC 27708 USA.; POWELL, GEORGE, WORLD WILDLIFE FUND, LIMA 14, PERU.	CONSERVATION GENETIC ANALYSES OF WILDLIFE HAVE INCREASED GREATLY IN THE PAST 10 YR, YET GENETIC STUDIES OF PARROTS ARE RARE BECAUSE OF DIFFICULTIES ASSOCIATED WITH CAPTURING THEM AND OBTAINING SAMPLES. RECENT STUDIES HAVE DEMONSTRATED THAT MOLTED FEATHERS CAN PROVIDE A USEFUL SOURCE OF DNA, BUT SUCCESS RATES HAVE VARIED CONSIDERABLY AMONG STUDIES. OUR OBJECTIVE WAS TO DETERMINE IF MOLTED MACAW FE…	111 RIVER ST, HOBOKEN 07030-5774, NJ USA	NA	LWAITS@UIDAHO.EDU	NA	NA	NA	2020-10-23	451IZ	10.1111/j.1557-9263.2009.00221.x	NA	NA	1557-9263	NA	NA	ANDES AMAZON INITIATIVE OF THE GORDON; BETTY MOORE FOUNDATIONGORDON AND BETTY MOORE FOUNDATION	THIS STUDY WAS MADE POSSIBLE BY A GRANT FROM THE ANDES AMAZON INITIATIVE OF THE GORDON AND BETTY MOORE FOUNDATION TO THE WORLD WILDLIFE FUND. THANKS TO EVERYONE WHO HELPED WITH SAMPLE COLLECTION, ESPECIALLY THE TRC FIELD LEADERS, G. T. VIGO, D. MATSUFUIJI, AND K. QUINTEROS. THANKS ALSO TO U. ALEMAN, S. PALMINTERI, AND K. ADAMEK FOR HELP DESIGNING THE TRAPS, A. CACERES FOR HELP OBTAINING PERMITS I…	NA	0273-8570	J. FIELD ORNITHOL.	JOURNAL OF FIELD ORNITHOLOGY	ENGLISH	NA	JUN	NA	58	2	NA	WAITS, LISETTE/0000-0002-1323-0812 BRIGHTSMITH, DONALD/0000-0002-3306-6490	NA	183-192	WILEY	ZOOLOGY	NA	NA	23	MOLTED FEATHERS FROM CLAY LICKS IN PERU PROVIDE DNA FOR THREE LARGE MACAWS (ARA ARARAUNA, A-CHLOROPTERUS, AND A-MACAO)	ARTICLE	0	26	80	ORNITHOLOGY
ISI000266955700003	rejected off topic illegal trade	Ada Sanchez	KUEMMEL U, 2008, KLEINTIERPRAXIS	KUEMMEL U;VERSPOHL J;WOLF P;KAMPHUES J	PET BIRDS; COLONIC CONTENTS; INTESTINAL DYSBIOSIS; ENTEROBACTERIACEAE	PSITTACINE BIRDS; ALIMENTARY-TRACT; BACTERIA; FLORA; FECES	KAMPHUES, J (CORRESPONDING AUTHOR), TIERARZTLICHE HSCH HANNOVER, INST TIERERNAHRUNG, BISCHOFSHOLER DAMM 15, D-30173 HANNOVER, GERMANY.; KUEMMEL, ULRIKE; WOLF, PETRA; KAMPHUES, JOSEF, UNIV VET MED HANNOVER, INST TIERERNAHRUNG, HANNOVER, GERMANY.; VERSPOHL, JUTTA, UNIV VET MED HANNOVER, INST MIKROBIOL, ZENTRUM INFEKT MED, HANNOVER, GERMANY.	INVESTIGATION ON THE MICROFLORA IN THE GASTROINTESTINAL CONTENTS AND EXCREMENT OF CLINICALLY HEALTHY LOVEBIRDS (AGAPORNIS SPP.) A MICROBIOLOGICAL EXAMINATION OF THE EXCRETA IS SUGGESTED IN ANY CASE WHERE THERE IS A MODIFIED EXCRETA QUALITY IN PET BIRDS, SO THAT INTESTINAL DYSBIOSIS OR PATHOGENIC BACTERIA CAN BE DETECTED. HOWEVER, SUCH AN ASSESSMENT CAN ONLY BE MEANINGFUL IF THERE IS DEEPER KNOWLE…	BORSIGSTRASSE 5, POSTFACH 16 42, 310460 ALFELD, GERMANY	NA	JOSEF.KAMPHUES@TIHO-HANNOVER.DE	NA	NA	NA	2020-10-23	457TG	NA	NA	NA	NA	NA	NA	NA	NA	NA	0023-2076	KLEINTIERPRAXIS	KLEINTIERPRAXIS	GERMAN	NA	DEC	NA	24	12	NA	NA	NA	763-769	M H SCHAPER GMBH CO KG	VETERINARY SCIENCES	WOLF, PETRA/B-9567-2017	NA	1	INVESTIGATION ON THE MICROFLORA IN THE GASTROINTESTINAL CONTENTS AND EXCREMENT OF CLINICALLY HEALTHY LOVEBIRDS (AGAPORNIS SPP.)	ARTICLE	0	6	53	VETERINARY SCIENCES
ISI000268148400034	included in review	Ada Sanchez	GUITTAR JL, 2009, REV BIOL TROP	GUITTAR JL;DEAR F;VAUGHAN C	ARA MACAO; COSTA RICA; NEST CAVITIES; OSA PENINSULA; SCARLET MACAW	BEHAVIOR	GUITTAR, JL (CORRESPONDING AUTHOR), GRINNELL COLL, GRINNELL, IA 50112 USA.; GUITTAR, JOHN L., GRINNELL COLL, GRINNELL, IA 50112 USA.; GUITTAR, JOHN L.; VAUGHAN, CHRISTOPHER, ASSOC COLL MIDW, SAN JOSE, COSTA RICA.; DEAR, FIONA, UNIV E ANGLIA, NORWICH NR4 7TJ, NORFOLK, ENGLAND.; VAUGHAN, CHRISTOPHER, UNIV WISCONSIN, MADISON, WI 53706 USA.; VAUGHAN, CHRISTOPHER, UNIV NACL, INT INST WILDLIFE CONSERVA…	THE SCAT-LET MACAW, (ARA MACAO) IS AN ENDANGERED SPECIES. IN COSTA RICA. THE SCARLET MACAW POPULATION OF THE CENTRAL PACIFIC CONSERVATION AREA (ACOPAC, N= 432 INDIVIDUALS) HAS UNDERGONE CONSIDERABLE STUDY AND HAS BEEN USED EFFECTIVELY AS A FLAGSHIP SPECIES FOR REGIONAL CONSERVATION. COSTA RICA'S ONLY OTHER VIABLE SCARLET MACAW POPULATION, LOCATED IN THE OSA PENINSULA CONSERVATION AREA (ACOSA, N=8…	UNIVERSIDAD DE COSTA RICA CIUDAD UNIVERSITARIA, SAN JOSE, COSTA RICA	NA	GUITTARJ@GMAIL.COM FIONA\_DEAR@HOTMAIL.COM CVAUGHAN@WISC.EDU	NA	NA	NA	2020-10-23	472QZ	NA	NA	NA	NA	NA	NA	ASSOCIATED COLLEGES OF THE MIDWEST (ACM); THE PARROT SOCIETY-UK; AMIGOS DE LA OSA	WE ARE THANKFUL TO MANY COMMUNITY MEMBERS INCLUDING ADRIAN MORALES POLANCO, EDUVIJES DE BAHIA DRAKE, AND LANA LUNA FOR LODGING AND ASSISTANCE WITH FINDING NESTS. ANDY PRUTER PROVIDED TREE CLIMBING MATERIALS. HAYDER SANTAMARIA, ELLECER ARCE, AND MINAE OFFERED TRANSPORTATION, LOGISTICAL ADVICE, AND NEST INFORMATION. LOCAL BOTANIST REINALDO AGUILAR FROM INBIO ASSISTED IN IDENTIFYING NESTING TREE SPE…	NA	0034-7744	REV. BIOL. TROP.	REVISTA DE BIOLOGIA TROPICAL	ENGLISH	NA	MAR-JUN	NA	17	12	DOAJ GOLD	NA	NA	387-393	REVISTA DE BIOLOGIA TROPICAL	LIFE SCIENCES \& BIOMEDICINE - OTHER TOPICS	NA	NA	4	SCARLET MACAW (ARA MACAO, PSITTACIFORMES: PSITTACIDAE) NEST CHARACTERISTICS IN THE OSA PENINSULA CONSERVATION AREA (ACOSA), COSTA RICA	ARTICLE	0	26	57	BIOLOGY
ISI000269120200011	rejected off topic illegal trade	Ada Sanchez	GODOY SN, 2009, BRAZ J MICROBIOL	GODOY SN;SAKAMOTO SM;DE PAULA CD;CATAO-DIAS JL;MATUSHIMA ER	MYCOBACTERIUM AVIUM; PSITTACINES; PATHOLOGY; BIRDS	IDENTIFICATION; COMPLEX	GODOY, SN (CORRESPONDING AUTHOR), INST CHICO MENDES CONSERVACAO BIODIVERSIDADE, ICMBIO, RUA PROF A ELIZABETE ROLIM 116, SAO PAULO, BRAZIL.; GODOY, SILVIA NERI, INST CHICO MENDES CONSERVACAO BIODIVERSIDADE, BRASILIA, DF, BRAZIL.; SAKAMOTO, SIDNEI MIYOSHI, ESCOLA SUPER AGR MOSSORO, DEPT CIENCIAS ANIM, MOSSORO, RN, BRAZIL.; DE PAULA, CATIA DEJUSTE; CATAO-DIAS, JOSE LUIZ; MATUSHIMA, ELIANA REIKO, UNI…	THE PRESENT STUDY IS A REPORT ON THE PRESENCE OF MYCOBACTERIUM AVIUM IN FOUR BIRDS OF THE PSITTACIFORM ORDER KEPT AS PETS. ANATOMOPATHOLOGICAL DIAGNOSIS SHOWED LESIONS SUGGESTIVE OF THE AGENT AND PRESENCE OF ALCOHOL-ACID RESISTANT BACILLI (AARB) SHOWN BY THE ZIEHL-NEELSEN STAINING. THE IDENTIFICATION OF MYCOBACTERIUM AVIUM WAS PERFORMED BY MEANS OF PRA (PCR RESTRICTION ANALYSIS). DNA WAS DIRECTLY…	AV PROF LINEU PRESTES,1374, 05508 SAO PAULO, BRAZIL	NA	SILNG@UOL.COM.BR	NA	NA	NA	2020-10-23	485KO	10.1590/S1517-83822009000200011	NA	NA	1678-4405	NA	NA	FUNDACAO DE AMPARO A PESQUISA (FAPESP)FUNDACAO DE AMPARO A PESQUISA DO ESTADO DE SAO PAULO (FAPESP)	D TO THE FUNDACAO DE AMPARO A PESQUISA (FAPESP) FOR FINANCIAL SUPPORT.	NA	1517-8382	BRAZ. J. MICROBIOL.	BRAZILIAN JOURNAL OF MICROBIOLOGY	ENGLISH	NA	APR-JUN	NA	12	2	DOAJ GOLD, GREEN PUBLISHED	NERI GODOY, SILVIA/0000-0002-0914-2959 CATAO-DIAS, JOSE LUIZ/0000-0003-2999-3395 SAKAMOTO, SIDNEI MIYOSHI/0000-0003-4116-0388	NA	265-268	SOC BRASILEIRA MICROBIOLOGIA	MICROBIOLOGY	NERI GODOY, SILVIA/B-4631-2015 SAKAMOTO, SIDNEI MIYOSHI/AAE-3483-2020 CATAO-DIAS, JOSE LUIZ/C-4897-2012	NA	3	DETECTION OF MYCOBACTERIUM AVIUM IN PET BIRDS	ARTICLE	0	2	40	MICROBIOLOGY
ISI000270299600007	rejected off topic illegal trade	Ada Sanchez	MARTORELL J, 2009, CLIN VET PEQUENOS ANIM	MARTORELL J	AVIAN; INTOXICATION; TOXIC; METAL	TOXICOSIS; DEATH	MARTORELL, J (CORRESPONDING AUTHOR), UNIV AUTONOMA BARCELONA, VET ANIM EXOTICOS, HOSP CLIN VET, DEPT MED \& CIRUGIA ANIM, BARCELONA, SPAIN.; UNIV AUTONOMA BARCELONA, VET ANIM EXOTICOS, HOSP CLIN VET, DEPT MED \& CIRUGIA ANIM, BARCELONA, SPAIN.	BIRDS ARE CURIOUS BY NATURE. POISONING IS NOT UNCOMMON IN PET PARROTS BECAUSE THE TENDENCY OF THESE BIRDS TO CHEW ON OBJECT IN THEIR ENVIRONMENT. THE MOST OF TOXICS THAT AFFECTED TO HUMANS ARE POTENTIALLY DANGEROUS FOR BIRDS. PETS WITH FREE HOUSEHOLD ACCESS ARE MORE LIKELY TO BE EXPOSED TO TOXICANTS. THE AVIAN HIGH METABOLIC RATE CAN ACCELERATE THE EFFECTS OF AN INGESTED TOXIN. THE MOST COMMONLY …	PASAJE MERCADER 13-15, BARCELONA, 08008, SPAIN	NA	NA	NA	NA	NA	2020-10-23	500KX	NA	NA	NA	NA	NA	NA	NA	NA	NA	1130-7064	CLIN. VET. PEQUENOS ANIM.	CLINICA VETERINARIA DE PEQUENOS ANIMALES	SPANISH	NA	NA	NA	16	3	NA	NA	NA	172-178	ICE SALUD	VETERINARY SCIENCES	NA	NA	1	POISONING IN BIRDS	ARTICLE	0	11	29	VETERINARY SCIENCES
ISI000271160200018	rejected off topic illegal trade	Ada Sanchez	KASICKOVA D, 2009, VET PARASITOL	KASICKOVA D;SAK B;KVAC M;DITRICH O	ENTEROCYTOZOON BIENEUSI; ENCEPHALITOZOON SPP.; EXOTIC BIRDS; INTERNAL; TRANSCRIBED SPACER; PCR; PREVALENCE	LOVEBIRD AGAPORNIS-ROSEICOLLIS; ENCEPHALITOZOON-HELLEM INFECTION;; ENTEROCYTOZOON-BIENEUSI; 1ST DETECTION; AIDS PATIENT; CUNICULI-III;; IDENTIFICATION; PIGEONS; KERATOCONJUNCTIVITIS; GENOTYPES	SAK, B (CORRESPONDING AUTHOR), ACAD SCI CZECH REPUBLIC, INST PARASITOL, CTR BIOL, VVI, BRANISOVSKA 31, CR-37005 CESKE BUDEJOVICE, CZECH REPUBLIC.; SAK, B.; KVAC, M.; DITRICH, O., ACAD SCI CZECH REPUBLIC, INST PARASITOL, CTR BIOL, VVI, CR-37005 CESKE BUDEJOVICE, CZECH REPUBLIC.; KASICKOVA, D.; DITRICH, O., UNIV S BOHEMIA CESKE BUDEJOVICE, FAC BIOL SCI, CESKE BUDEJOVICE 37005, CZECH REPUBLIC.; KVAC…	A TOTAL OF 287 FAECAL SPECIMENS OF CAPTIVE EXOTIC BIRDS FROM THE ORDERS PSITTACIFORMES, PASSERIFORMES AND COLUMBIFORMES WERE RANDOMLY COLLECTED FROM BOHEMIAN PET STORES, AVIAN BREEDERS AND AVIAN KEEPERS AND WERE SCREENED FOR THE PRESENCE OF HUMAN PATHOGENIC MICROSPORIDIA BY POLYMERASE CHAIN REACTION (PCR). MICROSPORIDIAL DNA WAS IDENTIFIED IN 115 FAECAL SAMPLES (40.1\%). SINGLE-SPECIES INFECTION …	PO BOX 211, 1000 AE AMSTERDAM, NETHERLANDS	NA	CASIO@PARU.CAS.CZ	NA	NA	NA	2020-10-23	511JL	10.1016/j.vetpar.2009.06.033	NA	NA	1873-2550	NA	NA	GRANT AGENCY OF THE CZECH REPUBLICGRANT AGENCY OF THE CZECH REPUBLIC [523/07/P117]; INSTITUTE OF PARASITOLOGY, ACADEMY OF SCIENCES OF THE CZECH REPUBLICCZECH ACADEMY OF SCIENCES [Z60220518]	THIS WORK WAS SUPPORTED BY THE GRANT OF THE GRANT AGENCY OF THE CZECH REPUBLIC (PROJECT NO. 523/07/P117) AND RESEARCH PROJECT OF THE INSTITUTE OF PARASITOLOGY, ACADEMY OF SCIENCES OF THE CZECH REPUBLIC (Z60220518).	NA	0304-4017	VET. PARASITOL.	VETERINARY PARASITOLOGY	ENGLISH	NA	OCT 28	NA	58	12	NA	KVAC, MARTIN/0000-0003-0013-6090	NA	125-130	ELSEVIER SCIENCE BV	PARASITOLOGY; VETERINARY SCIENCES	KVAC, MARTIN/G-7299-2014 KVAC, MARTIN/AAT-9533-2020 SAK, BOHUMIL/G-9262-2014	NA	44	SOURCES OF POTENTIALLY INFECTIOUS HUMAN MICROSPORIDIA: MOLECULAR CHARACTERISATION OF MICROSPORIDIA ISOLATES FROM EXOTIC BIRDS IN THE CZECH REPUBLIC, PREVALENCE STUDY AND IMPORTANCE OF BIRDS IN EPIDEMIOLOGY OF THE HUMAN MICROSPORIDIAL INFECTIONS	ARTICLE	0	16	165	PARASITOLOGY; VETERINARY SCIENCES
ISI000271483700005	rejected off topic illegal trade	Ada Sanchez	FAILING K, 2009, TIERARZTL PRAX AUSG KLEINTIERE HEIMTIERE	FAILING K;KALETA EF;KINNDLE MBP;THEIS HP	PSITTACOSIS; ANTIINFECTIVES; RESISTENCE; INHIBITORY CONCENTRATION 50\%;; IC(50)	CHLAMYDIA-TRACHOMATIS; IN-VITRO; PLASMA-CONCENTRATIONS; WATER;; RESISTANT; FEED	FAILING, K (CORRESPONDING AUTHOR), UNIV GIESSEN, FACHBEREICH VET MED, AG BIOMATH \& DATENVERARBEITUNG, FRANKFURTER STR 95, D-35392 GIESSEN, GERMANY.; FAILING, K., UNIV GIESSEN, FACHBEREICH VET MED, AG BIOMATH \& DATENVERARBEITUNG, D-35392 GIESSEN, GERMANY.; KALETA, E. F.; KINNDLE, M. B. P.; THEIS, H. -P., UNIV GIESSEN, FACHBEREICH VET MED, KLIN VOGEL REPTILIEN AMPHIBIEN \& FISCHE, D-35392 GIESSEN…	AIM OF THIS STUDY WAS TO DETERMINE QUANTITATIVELY THE DEGREE OF SENSITIVITY OF 42 ISOLATES OF CHLAMYDOPHILA PSITTACI FROM DOMESTIC AND PET BIRDS INCLUDING PSITTACINES AGAINST CHLORTETRACYCLINE, DOXYCYCLINE, ENROFLOXACIN, DIFLOXACIN, CLARITHROMYCIN AND ERYTHROMYCIN. MATERIAL AND METHODS: ALL ISOLATES WERE GROWN IN BUFFALO GREEN MONKEY KIDNEY (BGM) CELL CULTURES AND EXPOSED FOR 3 DAYS TO THESE SIX …	HOLDERLINSTRASSE 3, D-70174 STUTTGART, GERMANY	NA	KLAUS.FAILING@VETMED.UNI-GIESSEN.DE	NA	NA	NA	2020-10-23	515PG	NA	NA	NA	NA	NA	NA	NA	NA	NA	1434-1239	TIERARZTL. PRAX. AUSG. KLEINTIERE HEIMTIERE	TIERAERZTLICHE PRAXIS AUSGABE KLEINTIERE HEIMTIERE	GERMAN	NA	NA	NA	30	5	NA	NA	NA	334-341	SCHATTAUER GMBH-VERLAG MEDIZIN NATURWISSENSCHAFTEN	VETERINARY SCIENCES	NA	NA	2	IN VITRO-INVESTIGATION ON THE SUSCEPTIBILITY OF CHLAMYDOPHILA PSITTACI AGAINST CHLORTETRACYCLINE, DOXYCYCLINE, ENROFLOXACIN, DIFLOXACIN, CLARITHROMYCIN AND ERYTHROMYCIN	ARTICLE	0	9	37	VETERINARY SCIENCES
ISI000272029200005	rejected off topic illegal trade	Ada Sanchez	ZWEIFEL D, 2009, EUR J WILDL RES	ZWEIFEL D;HOOP R;SACHSE K;POSPISCHIL A;BOREL N	GENOTYPING; ZOONOSIS; ARRAYTUBE MICROARRAY; REAL-TIME PCR	CHLAMYDIA-PSITTACI; FERAL PIGEONS; IDENTIFICATION; INFECTIONS	BOREL, N (CORRESPONDING AUTHOR), UNIV ZURICH, VETSUISSE FAC, INST VET PATHOL, WINTERTHURERSTR 268, CH-8057 ZURICH, SWITZERLAND.; ZWEIFEL, DANIELA; POSPISCHIL, ANDREAS; BOREL, NICOLE, UNIV ZURICH, VETSUISSE FAC, INST VET PATHOL, CH-8057 ZURICH, SWITZERLAND.; HOOP, RICHARD, UNIV ZURICH, VETSUISSE FAC, NATL REFERENCE CTR POULTRY \& RABBIT DIS, CH-8057 ZURICH, SWITZERLAND.; SACHSE, KONRAD, FLI, NATL …	TO DETERMINE THE PREVALENCE OF CHLAMYDOPHILA PSITTACI IN WILD BIRDS, CLOACAL SWABS FROM 527 SONGBIRDS, 442 WATERFOWL, 84 FERAL PIGEONS, AND 38 CORMORANTS WERE EXAMINED BY CHLAMYDIACEAE-SPECIFIC REAL-TIME POLYMERASE CHAIN REACTION (PCR) AND ARRAYTUBE MICROARRAY ASSAYS FOR CHLAMYDIAL SPECIES DETERMINATION AND GENOTYPING OF C. PSITTACI. INCONCLUSIVE CASES WERE FURTHER CHARACTERIZED BY CONVENTIONAL P…	233 SPRING ST, NEW YORK, NY 10013 USA	NA	N.BOREL@ACCESS.UZH.CH	NA	NA	NA	2020-10-23	522VW	10.1007/s10344-009-0275-2	NA	NA	1439-0574	NA	NA	FEDERAL VETERINARY OFFICE (FVO), BERNE, SWITZERLAND [1.07.03]; INSTITUTE OF VETERINARY PATHOLOGY; CLINICAL LABORATORY, VETSUISSE FACULTY, UNIVERSITY OF ZURICH	THIS STUDY WAS KINDLY SUPPORTED BY THE FEDERAL VETERINARY OFFICE (FVO), BERNE, SWITZERLAND (PROJECT 1.07.03). WE THANK THE LABORATORY TECHNICAL STAFF OF THE INSTITUTE OF VETERINARY PATHOLOGY, OF THE NATIONAL REFERENCE CENTRE FOR POULTRY AND RABBIT DISEASES, AND OF THE CLINICAL LABORATORY, VETSUISSE FACULTY, UNIVERSITY OF ZURICH. WE ARE ALSO GRATEFUL TO MED. VET. SIGRID A. BOTTCHER, NATIONAL REFER…	NA	1612-4642	EUR. J. WILDL. RES.	EUROPEAN JOURNAL OF WILDLIFE RESEARCH	ENGLISH	NA	DEC	NA	19	6	GREEN ACCEPTED	BOREL, NICOLE/0000-0002-1556-9262 SACHSE, KONRAD/0000-0003-1230-1786	NA	575-581	SPRINGER	ENVIRONMENTAL SCIENCES \& ECOLOGY; ZOOLOGY	BOREL, NICOLE/M-6204-2016	NA	19	PREVALENCE OF CHLAMYDOPHILA PSITTACI IN WILD BIRDS-POTENTIAL RISK FOR DOMESTIC POULTRY, PET BIRDS, AND PUBLIC HEALTH?	ARTICLE	0	20	55	ECOLOGY; ZOOLOGY
ISI000272866500014	included in review	Ada Sanchez	PILLAY K, 2010, MOL ECOL RESOUR	PILLAY K;DAWSON DA;HORSBURGH MR;BURKE T;TAYLOR TD	CAPTIVE BRED; CROSS-SPECIES; ILLEGAL TRADE; MICROSATELLITE; PARENTAGE;; PARROT	CONSERVATION	TAYLOR, TD (CORRESPONDING AUTHOR), UNIV KWAZULU NATAL, SCH BIOL \& CONSERVAT SCI, PRIVATE BAG X01, ZA-3209 SCOTTSVILLE, SOUTH AFRICA.; PILLAY, KERUSHA; PERRIN, MIKE R.; TAYLOR, TIAWANNA D., UNIV KWAZULU NATAL, SCH BIOL \& CONSERVAT SCI, ZA-3209 SCOTTSVILLE, SOUTH AFRICA.; PILLAY, KERUSHA; DAWSON, DEBORAH A.; HORSBURGH, GAVIN J.; BURKE, TERRY, UNIV SHEFFIELD, DEPT ANIM \& PLANT SCI, SHEFFIELD S10 …	TWENTY-TWO POLYMORPHIC MICROSATELLITE LOCI WERE CHARACTERIZED IN THE CAPE PARROT, POICEPHALUS ROBUSTUS. NINETEEN LOCI WERE NEWLY ISOLATED FROM TWO CAPE PARROT GENOMIC LIBRARIES, AND THREE LOCI ISOLATED FROM OTHER PARROT SPECIES. LOCI WERE CHARACTERIZED IN 40 UNRELATED CAPTIVE CAPE PARROTS HELD BY AVICULTURALISTS. THE LOCI DISPLAYED BETWEEN TWO AND 24 ALLELES, WITH THE OBSERVED HETEROZYGOSITIES RA…	111 RIVER ST, HOBOKEN 07030-5774, NJ USA	NA	TIAWANNATAYLOR@GMAIL.COM	NA	NA	NA	2020-10-23	533ZY	10.1111/j.1755-0998.2009.02673.x	NA	NA	1755-0998	NA	NA	DARWIN INITIATIVE GRANT (DEFRA, UK)DEPARTMENT FOR ENVIRONMENT, FOOD \& RURAL AFFAIRS (DEFRA); NATURAL ENVIRONMENT RESEARCH COUNCILNERC NATURAL ENVIRONMENT RESEARCH COUNCIL [NBAF010001] FUNDING SOURCE: RESEARCHFISH	THIS RESEARCH WAS FUNDED BY A DARWIN INITIATIVE GRANT (DEFRA, UK) AND FORMS PART OF AN MSC STUDENTSHIP BY KP. WE THANK ANDY KRUPA FOR GENOTYPING ADVICE. CAPE PARROT SAMPLES WERE KINDLY PROVIDED BY RALPH CORREIA, WILLIAM HORSFIELD, CRAIG SYMES, GILL THOMPSON AND THE CAPE PARROT WORKING GROUP. SAMPLES USED IN CROSS-SPECIES ANALYSIS WERE PROVIDED BY MATT BERG, HANS CHENG, MIKE DOUBLE, JON EKSTROM, G…	NA	1755-098X	MOL. ECOL. RESOUR.	MOLECULAR ECOLOGY RESOURCES	ENGLISH	NA	JAN	NA	13	1	NA	BURKE, TERRY/0000-0003-3848-1244	NA	142-149	WILEY	BIOCHEMISTRY \& MOLECULAR BIOLOGY; ENVIRONMENTAL SCIENCES \& ECOLOGY; EVOLUTIONARY BIOLOGY	BURKE, TERRY/B-3196-2011	NA	12	TWENTY-TWO POLYMORPHIC MICROSATELLITE LOCI AIMED AT DETECTING ILLEGAL TRADE IN THE CAPE PARROT, POICEPHALUS ROBUSTUS (PSITTACIDAE, AVES)	ARTICLE	0	12	10	BIOCHEMISTRY \& MOLECULAR BIOLOGY; ECOLOGY; EVOLUTIONARY BIOLOGY
ISI000273100500002	included in review	JRFP	RIOS-MUNOZ CA, 2009, ORNITOL NEOTROP	RIOS-MUNOZ CA;NAVARRO-SIGUENZA AG	CONSERVATION; ECOLOGICAL NICHE MODELS; LAND USE CHANGES; MEXICO;; PARROTS; PROTECTED AREAS; SPECIES RICHNESS	GEOGRAPHIC DISTRIBUTIONS; SPECIES CONCEPTS; AMAZONA-FINSCHI; NEST SITES;; DEFORESTATION; POPULATION; FOREST; RICHNESS; TRACKING; ECOLOGY	RIOS-MUNOZ, CA (CORRESPONDING AUTHOR), UNIV NACL AUTONOMA MEXICO, FAC CIENCIAS, MUSEO ZOOL ALFONSO L HERRERA, APARTADO POSTAL 70-399, MEXICO CITY 04510, DF, MEXICO.; RIOS-MUNOZ, CESAR A.; NAVARRO-SIGUENZA, ADOLFO G., UNIV NACL AUTONOMA MEXICO, FAC CIENCIAS, MUSEO ZOOL ALFONSO L HERRERA, MEXICO CITY 04510, DF, MEXICO.	EFFECTS OF LAND USE CHANGE ON THE HYPOTHETICAL HABITAT AVAILABILITY FOR MEXICAN PARROTS. - HABITAT LOSS IS ONE OF THE MAIN THREATS FOR NEOTROPICAL PARROTS, BEING HUMAN-INDUCED LAND USE CHANGE A KEY ISSUE. IN THIS PAPER, WE ANALYZE THE MODIFICATION OF VEGETATION COVER FOR THREE TIME PERIODS (1976, 1996, AND 2000) UPON THE HYPOTHETICAL DISTRIBUTION OF 22 MEXICAN PARROT SPECIES, THROUGH THE USE OF E…	UNIV GEORGIA, WARNELL SCH FOREST RESOURCES, ATHENS, GA 30602-2152 USA	NA	RMUNOZ98@CIENCIAS.UNAM.MX	NA	NA	NA	2020-10-23	537GF	NA	NA	NA	NA	NA	NA	NA	NA	NA	1075-4377	ORNITOL. NEOTROP.	ORNITOLOGIA NEOTROPICAL	SPANISH	NA	NA	NA	66	4	NA	RIOS-MUNOZ, CESAR/0000-0002-3423-8936 NAVARRO-SIGUENZA, ADOLFO G./0000-0003-2652-7719	NA	491-509	NEOTROPICAL ORNITHOLOGICAL SOC, USGS PATUXENT WILDLIFE RESEARCH CTR	ZOOLOGY	RIOS-MUNOZ, CESAR/J-9384-2012	NA	30	EFFECTS OF LAND USE CHANGE ON THE HYPOTHETICAL HABITAT AVAILABILITY FOR MEXICAN PARROTS.	ARTICLE	1	22	20	ORNITHOLOGY
ISI000274354200016	rejected illegal trade circunstancial	Ada Sanchez	MARINI MA, 2010, BIOL CONSERV	MARINI MA;BARBET-MASSIN M;MARTINEZ NP;JIGUET F	BIOMOD; CLIMATE CHANGE; GEOGRAPHICAL DISTRIBUTION; ENSEMBLE FORECASTING;; MIGRATION; PSITTACIDAE	CLIMATE-CHANGE; SPECIES DISTRIBUTIONS; RANGE; PREDICTION; UNCERTAINTIES;; SUITABILITY; EVOLUTION; IMPROVE; SHIFTS; BIRDS	MARINI, MA (CORRESPONDING AUTHOR), UNIV BRASILIA, DEPT ZOOL, IB, BR-70910900 BRASILIA, DF, BRAZIL.; MARINI, MIGUEL ANGELO, UNIV BRASILIA, DEPT ZOOL, IB, BR-70910900 BRASILIA, DF, BRAZIL.; BARBET-MASSIN, MORGANE; JIGUET, FREDERIC, UPMC, CRBPO, UMR 7204,MNHN, CNRS, F-75005 PARIS, FRANCE.; MARTINEZ, JAIME; PRESTES, NEMORA P., UNIV PASSO FUNDO, INST CIENCIAS BIOL, BR-99001970 PASSO FUNDO, RS, BRAZIL.	THE RED-SPECTACLED AMAZON (AMAZONA PRETREI) IS AN ENDANGERED, SMALL RANGE AND MIGRATORY PARROT THREATENED BY HABITAT DESTRUCTION AND PET TRADE. WE MODELLED ITS GEOGRAPHICAL DISTRIBUTION WITH THE OBJECTIVE OF PREDICTING ITS HISTORICAL, CURRENT AND FUTURE (IN FACE OF CLIMATIC CHANGES) GEOGRAPHICAL DISTRIBUTIONS. WE ALSO TESTED THE ASSUMPTION THAT THE SPECIES TRACKS SIMILAR ECOLOGICAL CONDITIONS WHI…	THE BOULEVARD, LANGFORD LANE, KIDLINGTON, OXFORD OX5 1GB, OXON, ENGLAND	NA	MARINI@UNB.BR BARBET@MAGBIO.ENS.FR MARTINEZ@VIA-RS.NET NEMORA@VIA-RS.NET FJIGUET@MNHN.FR	NA	NA	NA	2020-10-23	553GK	10.1016/j.biocon.2009.09.009	NA	NA	1873-2917	NA	NA	CAPESCAPES; O BOTICARIO DE PROTECAO A NATUREZA; FUNDO NACIONAL DO MEIO AMBIENTE/BRAZILIAN GOVERNMENT	M.A.M. WAS SUPPORTED BY A POST-DOCTORATE FELLOWSHIP FROM CAPES. COLLECTION OF FIELD DATA WAS SUPPORTED BY ``O BOTICARIO DE PROTECAO A NATUREZA'' AND ``FUNDO NACIONAL DO MEIO AMBIENTE/BRAZILIAN GOVERNMENT. WE THANK W. THUILLER FOR PROVIDING THE UPDATED VERSION OF BIOMOD AND ICMBIO (INSTITUTO CHICO MENDES DE CONSERVACAO DA BIODIVERSIDADE) AND IBAMA/CSR (CENTRO DE SENSORIAMENTO REMOTO) FOR THE RESER…	NA	0006-3207	BIOL. CONSERV.	BIOLOGICAL CONSERVATION	ENGLISH	NA	JAN	NA	87	1	NA	MARINI, MIGUEL A/0000-0002-7300-7321 PAULETTI PRESTES, NEMORA/0000-0003-3291-2955 MARTINEZ, JAIME/0000-0002-7164-1951	NA	102-112	ELSEVIER SCI LTD	BIODIVERSITY \& CONSERVATION; ENVIRONMENTAL SCIENCES \& ECOLOGY	MARINI, MIGUEL A/J-6251-2012	NA	42	APPLYING ECOLOGICAL NICHE MODELLING TO PLAN CONSERVATION ACTIONS FOR THE RED-SPECTACLED AMAZON (AMAZONA PRETREI)	ARTICLE	1	66	143	BIODIVERSITY CONSERVATION; ECOLOGY; ENVIRONMENTAL SCIENCES
ISI000274606400002	rejected off topic illegal trade	Ada Sanchez	KLAPHAKE E, 2009, J AVIAN MED SURG	KLAPHAKE E;FECTEAU K;DEWIT M;GREENACRE C;GRIZZLE J;JONES M;ZAGAYA LK;OLIVER J	17 BETA-ESTRADIOL; ANDROSTENEDIONE; PSITTACINE BIRD; LEUPROLIDE ACETATE;; FECAL HORMONES; AVIAN; HISPANIOLAN AMAZON PARROTS; AMAZONA VENTRALIS	COCKATIEL NYMPHICUS-HOLLANDICUS; LUTEINIZING-HORMONE; EGG-PRODUCTION;; LAYING HENS; TESTOSTERONE; STRESS; REPRODUCTION; METABOLISM; EXCRETION;; AGONIST	KLAPHAKE, E (CORRESPONDING AUTHOR), ANIM MED CTR ZOOMONTANA, BOZEMAN, MT 59715 USA.; FECTEAU, KELLIE; ABNEY, L. KIM; OLIVER, JACK, UNIV TENNESSEE, COLL VET MED, DEPT COMPARAT MED, KNOXVILLE, TN 37996 USA.; GRIZZLE, JUDITH, UNIV TENNESSEE, DEPT ANIM SCI, INST AGR, KNOXVILLE, TN 37996 USA.; DEWIT, MARTINE, WHITE OAK CONSERVAT CTR, YULEE, FL 33711 USA.; KLAPHAKE, ERIC; GREENACRE, CHERYL; JONES, MICH…	THE LUTEINIZING HORMONE-RELEASING HORMONE AGONIST LEUPROLIDE ACETATE IS USED COMMONLY TO MANAGE REPRODUCTIVE PROBLEMS IN PET BIRDS. TO DETERMINE THE EFFECT OF LEUPROLIDE ACETATE ON PLASMA AND FECAL HORMONE LEVELS IN A PSITTACINE SPECIES, A SINGLE 800 MU G/KG DOSE OF THE 30-DAY DEPOT FORM OF LEUPROLIDE ACETATE WAS ADMINISTERED 1M IN I I HEALTHY, NONBREEDING ADULT HISPANIOLAN AMAZON PARROTS (AMAZON…	PO BOX 811720, BOCA RATON, FL 33481 USA	NA	NA	NA	NA	NA	2020-10-23	556QO	10.1647/2008-061R.1	NA	NA	NA	NA	NA	UNIVERSITY OF TENNESSEE COLLEGE OF VETERINARY MEDICINE'S OFFICE OF RESEARCH AND GRADUATE PROGRAMS; MID-ATLANTIC STATES ASSOCIATION OF AVIAN VETERINARIANS; TENNESSEE VALLEY EXOTIC BIRD CLUB	WE THANK THE UNIVERSITY OF TENNESSEE COLLEGE OF VETERINARY MEDICINE'S OFFICE OF RESEARCH AND GRADUATE PROGRAMS, THE MID-ATLANTIC STATES ASSOCIATION OF AVIAN VETERINARIANS, AND THE TENNESSEE VALLEY EXOTIC BIRD CLUB FOR THEIR FINANCIAL SUPPORT. WE ALSO THANK DR JESSI SMITH-KLAPHAKE FOR STATISTICAL EVALUATION AND INTERPRETATION, DRS LINDA PENFOLD AND JAMES MILLAM FOR THEIR SUGGESTIONS IN DEVELOPING …	NA	1082-6742	J. AVIAN MED. SURG.	JOURNAL OF AVIAN MEDICINE AND SURGERY	ENGLISH	NA	DEC	NA	33	4	NA	NA	NA	253-262	ASSOC AVIAN VETERINARIANS	VETERINARY SCIENCES	NA	NA	9	EFFECTS OF LEUPROLIDE ACETATE ON SELECTED BLOOD AND FECAL SEX HORMONES IN HISPANIOLAN AMAZON PARROTS (AMAZONA VENTRALIS)	ARTICLE	0	7	23	VETERINARY SCIENCES
ISI000274770200018	included in review	Ada Sanchez	RIVERA L, 2010, ORYX	RIVERA L;LLANOS RR;POLITI N;HENNESSEY B;BUCHER EH	AMAZONA TUCUMANA; CITES; MONTANE FOREST; PET TRADE; RED LIST; SOUTHERN; YUNGAS; TUCUMAN PARROT	NA	RIVERA, L (CORRESPONDING AUTHOR), UNIV NACL CORDOBA, CTR ZOOL APLICADA, CC 122, RA-5000 CORDOBA, ARGENTINA.; RIVERA, LUIS; BUCHER, ENRIQUE H., UNIV NACL CORDOBA, CTR ZOOL APLICADA, RA-5000 CORDOBA, ARGENTINA.; LLANOS, RAUL ROJAS; HENNESSEY, BENNETT, ARMONIA BIRDLIFE, SANTA CRUZ, BOLIVIA.; POLITI, NATALIA, UNIV MAINE, DEPT WILDLIFE ECOL, ORONO, ME USA.	THE TUCUMAN PARROT AMAZONA TUCUMANA IS RESTRICTED TO THE SOUTHERN YUNGAS MOUNTAINS, FROM SOUTHEASTERN BOLIVIA TO NORTH-WESTERN ARGENTINA, AND HAS UNDERGONE INTENSE CAPTURE FOR THE PET TRADE. WE PROVIDE UPDATED INFORMATION ON THE STATUS OF THE BOLIVIAN POPULATION OF THE SPECIES AND PAST CAPTURE LEVELS FOR THE INTERNATIONAL PET TRADE. WE SURVEYED 18 SITES DURING THE NON-BREEDING SEASON IN 2006 AND …	32 AVENUE OF THE AMERICAS, NEW YORK, NY 10013-2473 USA	NA	LUOSVRIV@YAHOO.COM	NA	NA	NA	2020-10-23	558TO	10.1017/S0030605309990950	NA	NA	NA	NA	NA	LORO PARQUE FUNDACION; YPF; OVERBROOK FELLOWSHIP	THIS WORK WAS SUPPORTED BY LORO PARQUE FUNDACION. WE ARE GRATEFUL TO PEDRO BLENDINGER, OSWALDO MAELLARD, PAOLA MONTENEGRO AND SEBASTIAN HERZOG FOR INFORMATION. JORGELINA BRASCA REVISED THE ENGLISH TEXT. LR CONDUCTED THIS WORK AS A DOCTORAL STUDENT OF THE UNIVERSITY OF CORDOBA, ARGENTINA, WITH THE SUPPORT OF FUNDACION YPF AND OVERBROOK FELLOWSHIP.	NA	0030-6053	ORYX	ORYX	ENGLISH	NA	JAN	NA	20	1	BRONZE	NA	NA	110-113	CAMBRIDGE UNIV PRESS	BIODIVERSITY \& CONSERVATION; ENVIRONMENTAL SCIENCES \& ECOLOGY	NA	NA	9	THE NEAR THREATENED TUCUMAN PARROT AMAZONA TUCUMANA IN BOLIVIA: INSIGHTS FOR A GLOBAL ASSESSMENT	ARTICLE	0	10	44	BIODIVERSITY CONSERVATION; ECOLOGY
ISI000274941600012	included in review	Ada Sanchez	DA NOBREGA ALVES RR, 2010, HUM ECOL	DA NOBREGA ALVES RR;NOGUEIRA EEG;ARAUJO HFP;BROOKS SE	BIRD CONSERVATION; HUNTING; PET TRADE; SEMI-ARID; BRAZIL	FISHING COMMUNITIES; REMEDIES; PARROTS; REGION	ALVES, RRD (CORRESPONDING AUTHOR), UNIV ESTADUAL PARAIBA, DEPT BIOL, AV BARAUNAS,351 CAMPUS UNIV, BR-58109753 CAMPINA GRANDE, PARAIBA, BRAZIL.; DA NOBREGA ALVES, ROMULO ROMEU; NOGUEIRA, EMERINA E. G., UNIV ESTADUAL PARAIBA, DEPT BIOL, BR-58109753 CAMPINA GRANDE, PARAIBA, BRAZIL.; ARAUJO, HELDER F. P., UNIV FED PARAIBA, DEPT CIENCIAS BIOL, BR-58397000 AREIA, PARAIBA, BRAZIL.; BROOKS, SHARON E., UN…	BRAZIL HAS ONE OF THE GREATEST BIRD DIVERSITIES IN THE WORLD, WITH AROUND 1,800 SPECIES. HOWEVER, MANY SPECIES ARE NOW THREATENED BY ILLEGAL CAPTURE AND TRADE THAT IS LARGELY DRIVEN BY THE CULTURE OF KEEPING WILD BIRDS AS PETS. THIS STUDY DOCUMENTS THE NATURE AND PURPOSE OF BIRD CAPTURE AND TRADE IN THE SEMI-ARID CAATINGA BIOME IN NORTHEASTERN BRAZIL, WHICH HAS AROUND 510 BIRD SPECIES AND A POPUL…	233 SPRING ST, NEW YORK, NY 10013 USA	NA	ROMULO\_NOBREGA@YAHOO.COM.BR	NA	NA	NA	2020-10-23	560YL	10.1007/s10745-009-9295-5	NA	NA	1572-9915	NA	NA	NA	NA	NA	0300-7839	HUM. ECOL.	HUMAN ECOLOGY	ENGLISH	NA	FEB	NA	54	1	NA	ALVES, ROMULO ROMEU NOBREGA/0000-0001-6824-0797 ARAUJO, HELDER/0000-0001-6237-6490	NA	147-156	SPRINGER/PLENUM PUBLISHERS	ANTHROPOLOGY; ENVIRONMENTAL SCIENCES \& ECOLOGY; SOCIOLOGY	ALVES, ROMULO ROMEU NOBREGA/A-7026-2009 ARAUJO, HELDER/I-1218-2012	NA	59	BIRD-KEEPING IN THE CAATINGA, NE BRAZIL	ARTICLE	2	33	38	ANTHROPOLOGY; ENVIRONMENTAL STUDIES; SOCIOLOGY
ISI000278702000015	rejected off topic illegal trade	Ada Sanchez	BRILHANTE RSN, 2010, J MED MICROBIOL	BRILHANTE RSN;CASTELO-BRANCO DSCM;SOARES GDP;ASTETE-MEDRANO DJ;MONTEIRO AJ;CORDEIRO JJC;ROCHA MFG	NA	FUNGAL FLORA; BIRDS; CANDIDIASIS; TRICHOSPORON; DROPPINGS	BRILHANTE, RSN (CORRESPONDING AUTHOR), UNIV ESTADUAL CEARA, POSTGRAD PROGRAM VET SCI, SCH VET MED, AVE PARANJANA 1700, BR-60740903 FORTALEZA, CEARA, BRAZIL.; BRILHANTE, R. S. N.; CASTELO-BRANCO, D. S. C. M.; ASTETE-MEDRANO, D. J.; CORDEIRO, R. A.; SIDRIM, J. J. C.; ROCHA, M. F. G., UNIV ESTADUAL CEARA, POSTGRAD PROGRAM VET SCI, SCH VET MED, BR-60740903 FORTALEZA, CEARA, BRAZIL.; CASTELO-BRANCO, D…	COCKATIELS ARE THE WORLD'S SECOND MOST POPULAR PSITTACINE PET BIRD, BUT NO DATA CHARACTERIZING THEIR GASTROINTESTINAL MICROBIOTA HAVE BEEN FOUND. THUS, THE AIM OF THIS WORK WAS TO CHARACTERIZE THE YEAST GASTROINTESTINAL MICROBIOTA OF COCKATIELS AND TO EVALUATE THE RELEVANCE OF COCKATIELS AS CARRIERS OF POTENTIALLY PATHOGENIC YEASTS A TOTAL OF 60 COCKATIELS, FROM 15 DIFFERENT PREMISES, WERE ASSESS…	MARLBOROUGH HOUSE, BASINGSTOKE RD, SPENCERS WOODS, READING RG7 1AG, BERKS, ENGLAND	NA	NA	NA	NA	NA	2020-10-23	610AU	10.1099/jmm.0.017426-0	NA	NA	NA	NA	NA	CNPQ (NATIONAL SCIENTIFIC AND TECHNOLOGICAL RESEARCH COUNCIL)NATIONAL COUNCIL FOR SCIENTIFIC AND TECHNOLOGICAL DEVELOPMENT (CNPQ) [473881/2008-0]	THIS WORK WAS SUPPORTED BY CNPQ (NATIONAL SCIENTIFIC AND TECHNOLOGICAL RESEARCH COUNCIL - PROCESS 473881/2008-0)	NA	0022-2615	J. MED. MICROBIOL.	JOURNAL OF MEDICAL MICROBIOLOGY	ENGLISH	NA	JUN	NA	26	6	BRONZE, GREEN PUBLISHED	CASTELO-BRANCO, D. S. C. M./0000-0002-6045-2354	NA	718-723	SOC GENERAL MICROBIOLOGY	MICROBIOLOGY	CASTELO-BRANCO, D. S. C. M./F-8290-2014 CORDEIRO, ROSSANA/AAD-7595-2020	NA	33	CHARACTERIZATION OF THE GASTROINTESTINAL YEAST MICROBIOTA OF COCKATIELS (NYMPHICUS HOLLANDICUS): A POTENTIAL HAZARD TO HUMAN HEALTH	ARTICLE	0	3	59	MICROBIOLOGY
ISI000278836600017	included in review	Ada Sanchez	BARRE N, 2010, J ORNITHOL	BARRE N;THEUERKAUF J;VERFAILLE L;PRIMOT P;SAOUMOE M	NEST POACHING; PUBLIC AWARENESS; RECOVERY PLAN; THREATS	PARROTS	THEUERKAUF, J (CORRESPONDING AUTHOR), POLISH ACAD SCI, MUSEUM \& INST ZOOL, WILCZA 64, PL-00679 WARSAW, POLAND.; THEUERKAUF, JOERN, POLISH ACAD SCI, MUSEUM \& INST ZOOL, PL-00679 WARSAW, POLAND.; BARRE, NICOLAS, SCO IAC CIRAD, NOUMEA 98846, NEW CALEDONIA.; VERFAILLE, LUDOVIC; PRIMOT, PIERRE; SAOUMOE, MAURICE, DIRECT DEV ECON, WE 98820, LIFOU, NEW CALEDONIA.	THE OUV,A PARAKEET (EUNYMPHICUS UVAEENSIS), ENDEMIC TO OUV,A ISLAND (LOYALTY ISLANDS, NEW CALEDONIA, SOUTH-WEST PACIFIC), IS A RAINFOREST BIRD THAT IS DEPENDENT ON TREE CAVITIES FOR NESTING. IT IS THREATENED BY DEFORESTATION, BUT ALSO BY COMPETITION FOR NEST SITES WITH INTRODUCED BEES, HARVESTING FOR PETS, AND POTENTIALLY PREDATION BY INTRODUCED SPECIES. DESPITE THESE THREATS, WE SHOW THAT THE OU…	233 SPRING ST, NEW YORK, NY 10013 USA	NA	BELAIRBARRE@HOTMAIL.FR JTHEUER@MIIZ.WAW.PL VERFAILLE@LOYALTY.NC P.PRIMOT@OIE.INT M-SAOUMOE@LOYALTY.NC	NA	NA	NA	2020-10-23	611QW	10.1007/s10336-010-0499-7	NA	NA	NA	NA	NA	PROVINCE DES ILES LOYAUTE (NEW CALEDONIA); ASPO (NEW CALEDONIA); SOCIETE CALEDONIENNE D'ORNITHOLOGIE (NEW CALEDONIA); BRITISH BIRDWATCHING FAIR (U.K.); LORO PARQUE FUNDACION (SPAIN); FONDS FUR BEDROHTE PAPAGEIEN-ZOOLOGISCHE GESELLSCHAFT FUR ARTEN- UND POPULATIONSSCHUTZ (GERMANY)	THIS STUDY WAS FINANCED BY THE PROVINCE DES ILES LOYAUTE (NEW CALEDONIA), THE ASPO (NEW CALEDONIA), THE SOCIETE CALEDONIENNE D'ORNITHOLOGIE (NEW CALEDONIA) AND THE BRITISH BIRDWATCHING FAIR (U.K.). J.T. WAS SUPPORTED BY THE LORO PARQUE FUNDACION (SPAIN) AND FONDS FUR BEDROHTE PAPAGEIEN-ZOOLOGISCHE GESELLSCHAFT FUR ARTEN- UND POPULATIONSSCHUTZ (GERMANY). WE THANK THE MEMBERS OF THE ASPO-S. BAOUTUA…	NA	0021-8375	J. ORNITHOL.	JOURNAL OF ORNITHOLOGY	ENGLISH	NA	JUL	NA	30	3	NA	THEUERKAUF, JORN/0000-0002-7273-3073	NA	695-701	SPRINGER	ZOOLOGY	THEUERKAUF, JORN/B-6823-2009	NA	11	EXPONENTIAL POPULATION INCREASE IN THE ENDANGERED OUV,A PARAKEET (EUNYMPHICUS UVAEENSIS) AFTER COMMUNITY-BASED PROTECTION FROM NEST POACHING	ARTICLE	0	8	151	ORNITHOLOGY
ISI000281631300008	rejected off topic illegal trade	Ada Sanchez	FRYNTA D, 2010, PLOS ONE	FRYNTA D;LISKOVA S;BUELTMANN S;BURDA H	NA	ZOO VISITOR PREFERENCES; ARK; REINTRODUCTION; IMITATION; SURVIVAL;; ANIMALS; AMAZON; TRADE; BIRDS; NEST	FRYNTA, D (CORRESPONDING AUTHOR), CHARLES UNIV PRAGUE, FAC SCI, DEPT ZOOL, PRAGUE, CZECH REPUBLIC.; FRYNTA, DANIEL; LISKOVA, SILVIE, CHARLES UNIV PRAGUE, FAC SCI, DEPT ZOOL, PRAGUE, CZECH REPUBLIC.; BUELTMANN, SEBASTIAN; BURDA, HYNEK, UNIV DUISBURG ESSEN, DEPT GEN ZOOL, FAC BIOSCI, ESSEN, GERMANY.	BACKGROUND: PARROTS ARE ONE OF THE MOST FREQUENTLY KEPT AND BRED BIRD ORDERS IN CAPTIVITY. THIS INCREASES POACHING AND THUS THE POTENTIAL IMPORTANCE OF CAPTIVE POPULATIONS FOR RESCUE PROGRAMMES MANAGED BY ZOOS AND RELATED INSTITUTIONS. BOTH CAPTIVE BREEDING AND POACHING ARE SELECTIVE AND MAY BE INFLUENCED BY THE ATTRACTIVENESS OF PARTICULAR SPECIES TO HUMANS. IN THIS PAPER, WE TESTED THE HYPOTHES…	185 BERRY ST, STE 1300, SAN FRANCISCO, CA 94107 USA	E12568	FRYNTA@CENTRUM.CZ	NA	NA	NA	2020-10-23	647PO	10.1371/journal.pone.0012568	NA	NA	NA	NA	NA	GRANT AGENCY OF THE ACADEMY OF SCIENCES OF THE CZECH REPUBLICCZECH ACADEMY OF SCIENCESGRANT AGENCY OF THE CZECH REPUBLIC [IAA601410803]	THE PROJECT WAS SUPPORTED BY THE THE GRANT AGENCY OF THE ACADEMY OF SCIENCES OF THE CZECH REPUBLIC (PROJECT NO. IAA601410803), HTTP://WWW.ISVAV.CZ/PROJECTDETAIL.DO?ROWID = IAA601410803. THE FUNDERS HAD NO ROLE IN STUDY DESIGN, DATA COLLECTION AND ANALYSIS, DECISION TO PUBLISH, OR PREPARATION OF THE MANUSCRIPT.	NA	1932-6203	PLOS ONE	PLOS ONE	ENGLISH	NA	SEP 7	NA	49	9	DOAJ GOLD, GREEN PUBLISHED	FRYNTA, DANIEL/0000-0002-1375-7972 RADLOVA, SILVIE/0000-0003-3581-9780 RADLOVA, SILVIE/0000-0003-3581-9780	NA	NA	PUBLIC LIBRARY SCIENCE	SCIENCE \& TECHNOLOGY - OTHER TOPICS	FRYNTA, DANIEL/L-7350-2016 BULTMANN, SEBASTIAN/AAC-7729-2020 RADLOVA, SILVIE/L-3388-2019 RADLOVA, SILVIE/D-5532-2017	NA	44	BEING ATTRACTIVE BRINGS ADVANTAGES: THE CASE OF PARROT SPECIES IN CAPTIVITY	ARTICLE	0	70	5	MULTIDISCIPLINARY SCIENCES
ISI000281753400026	rejected off topic parrots	JRFP	SCHILLIGER L, 2010, J VET DIAGN INVEST	SCHILLIGER L;LEMBERGER K;CHAI N;BOURGEOIS A;CHARPENTIER M	ATHEROSCLEROSIS; BEARDED DRAGONS; ECHOCARDIOGRAPHY; EXOTIC PETS;; LIZARDS; REPTILES	MECHANISMS; PARROTS; IMMUNE	SCHILLIGER, L (CORRESPONDING AUTHOR), CLIN VET VILLAGE AUTEUIL, 35 RUE LECONTE LISLE, F-75016 PARIS, FRANCE.; SCHILLIGER, LIONEL, CLIN VET VILLAGE AUTEUIL, F-75016 PARIS, FRANCE.; LEMBERGER, KARIN, VET DIAGNOST LAB, LYON, FRANCE.; CHAI, NORIN; BOURGEOIS, AUDE, MENAGERIE JARDIN PLANTES, PARIS, FRANCE.; CHARPENTIER, MAUD, FAC MED VET LIEGE, LIEGE, BELGIUM.	ATHEROSCLEROSIS IS A COMMON DISEASE IN PET BIRDS, PARTICULARLY IN PSITTACINES, AND IS FREQUENTLY FOUND WHEN PERFORMING POSTMORTEM EXAMINATIONS ON ADULT AND OLD DOGS, IN WHICH IT IS MAINLY ASSOCIATED WITH ENDOCRINE DISEASES, SUCH AS HYPOTHYROIDISM AND DIABETES MELLITUS. HOWEVER, ATHEROSCLEROSIS IS POORLY DOCUMENTED IN REPTILES AND CONSEQUENTLY POORLY UNDERSTOOD. IN THE CURRENT CASE REPORT. ATHEROS…	2455 TELLER RD, THOUSAND OAKS, CA 91320 USA	NA	DR.L.SCHILLIGER@CLINVEI-AUTEUIL.COM	NA	NA	NA	2020-10-23	649FL	10.1177/104063871002200526	NA	NA	NA	NA	NA	NA	NA	NA	1040-6387	J. VET. DIAGN. INVEST.	JOURNAL OF VETERINARY DIAGNOSTIC INVESTIGATION	ENGLISH	NA	SEP	NA	25	5	BRONZE	NA	NA	789-792	SAGE PUBLICATIONS INC	VETERINARY SCIENCES	NA	NA	11	ATHEROSCLEROSIS ASSOCIATED WITH PERICARDIAL EFFUSION IN A CENTRAL BEARDED DRAGON (POGONA VITTICEPS)	ARTICLE	0	7	22	VETERINARY SCIENCES
ISI000283114700025	rejected off topic illegal trade	Ada Sanchez	LEMUS JA, 2010, PLOS ONE	LEMUS JA;FARGALLO JA;VERGARA P;PAREJO D;BANDA E	NA	CHLAMYDOPHILA-PSITTACI; PROTEIN ELECTROPHORESIS; KESTRELS; DIVERSITY;; LESSER; VIRUS; DISEASES; RAPTORS; POULTRY; GERMANY	LEMUS, JA (CORRESPONDING AUTHOR), MUSEO NACL CIENCIAS NAT CSIC, DEPT ECOL EVOLUT, MADRID, SPAIN.; LEMUS, JESUS A.; FARGALLO, JUAN A., MUSEO NACL CIENCIAS NAT CSIC, DEPT ECOL EVOLUT, MADRID, SPAIN.; VERGARA, PABLO, UNIV ABERDEEN, SCH BIOL SCI, ACES, ABERDEEN, SCOTLAND.; PAREJO, DESEADA, ESTAC EXPT ZONAS ARIDAS CSIC, DEPT ECOL FUNC \& EVOLUT, ALMERIA, SPAIN.; BANDA, EVA, MINIST MEDIO AMBIENTE \& ME…	THE STUDY OF CROSS-SPECIES PATHOGEN TRANSMISSION IS ESSENTIAL TO UNDERSTANDING THE EPIZOOTIOLOGY AND EPIDEMIOLOGY OF INFECTIOUS DISEASES. AVIAN CHLAMYDIOSIS IS A ZOONOTIC DISEASE WHOSE EFFECTS HAVE BEEN MAINLY INVESTIGATED IN HUMANS, POULTRY AND PET BIRDS. IT HAS BEEN SUGGESTED THAT WILD BIRD SPECIES PLAY AN IMPORTANT ROLE AS RESERVOIRS FOR THIS DISEASE. DURING A COMPARATIVE HEALTH STATUS SURVEY …	185 BERRY ST, STE 1300, SAN FRANCISCO, CA 94107 USA	E13512	JLEMUS@EBD.CSIC.ES	NA	NA	NA	2020-10-23	666KU	10.1371/journal.pone.0013512	NA	NA	NA	NA	NA	SPANISH MINISTERIO DE CIENCIA E INNOVACIONINSTITUTO DE SALUD CARLOS IIISPANISH GOVERNMENT [CGL2007-61395/BOS]	THE SPANISH MINISTERIO DE CIENCIA E INNOVACION (PROJECT CGL2007-61395/BOS) FINANCED THE STUDY. THE FUNDERS HAD NO ROLE IN STUDY DESIGN, DATA COLLECTION AND ANALYSIS, DECISION TO PUBLISH, OR PREPARATION OF THE MANUSCRIPT.	NA	1932-6203	PLOS ONE	PLOS ONE	ENGLISH	NA	OCT 19	NA	55	10	DOAJ GOLD, GREEN PUBLISHED	FARGALLO, JUAN A/0000-0003-4090-9000 DESEADA, PAREJO/0000-0002-7368-2378	NA	NA	PUBLIC LIBRARY SCIENCE	SCIENCE \& TECHNOLOGY - OTHER TOPICS	VERGARA, PABLO/G-1860-2010 FARGALLO, JUAN A/I-5585-2015 DESEADA, PAREJO/L-3953-2014	NA	12	NATURAL CROSS CHLAMYDIAL INFECTION BETWEEN LIVESTOCK AND FREE-LIVING BIRD SPECIES	ARTICLE	0	33	5	MULTIDISCIPLINARY SCIENCES
ISI000283567600005	included in review	Ada Sanchez	THIJL VANSTREELS RE, 2010, ZOO BIOL	THIJL VANSTREELS RE;FRICIELLO TEIXEIRA LC;VELOSO NUNES AL;MATUSHIMA ER	AMAZONA; BRAZIL; ZOO; ANIMAL TRAFFIC; DEMOGRAPHY	PUERTO-RICAN PARROTS; JUVENILE MORTALITY; SURVIVAL; CAPTIVITY; ZOO;; FOREST; BIRDS; WILD	VANSTREELS, RET (CORRESPONDING AUTHOR), R ORLANDO MARQUES DE PAIVA 87, BR-05508000 SAO PAULO, BRAZIL.; THIJL VANSTREELS, RALPH ERIC; MATUSHIMA, ELIANA REIKO, UNIV SAO PAULO, FAC VET MED, DEPT PATHOL, SAO PAULO, BRAZIL.; FRICIELLO TEIXEIRA, RODRIGO HIDALGO; CAMARGO, LUIS CARLOS; VELOSO NUNES, ADAUTO LUIS, PARQUE ZOOL MUNICIPAL QUINZINHO DE BARROS, SAO PAULO, BRAZIL.	ELEVEN SPECIES OF AMAZON PARROTS (GENUS AMAZONA) ARE KNOWN TO OCCUR IN BRAZIL, AND NEST POACHING AND ILLEGAL TRAFFIC POSE SERIOUS CONSERVATION THREATS TO THESE SPECIES. WHEN THE ILLEGAL OWNERS REALIZE THESE ANIMALS ARE INCOMPATIBLE WITH THEIR EXPECTATIONS AND LIFESTYLE, OR WHEN THE POLICE ARRESTS TRADERS AND OWNERS, THESE TRAFFICKED ANIMALS ARE OFTEN CONSIDERED UNFIT FOR RELEASE AND SENT TO LOCAL…	DIV JOHN WILEY \& SONS INC, 111 RIVER ST, HOBOKEN, NJ 07030 USA	NA	RALPH\_VANSTREELS@YAHOO.COM.BR	NA	NA	NA	2020-10-23	672FE	10.1002/zoo.20300	NA	NA	NA	NA	NA	NA	NA	NA	0733-3188	ZOO BIOL.	ZOO BIOLOGY	ENGLISH	NA	SEP-OCT	NA	51	5	NA	NA	NA	600-614	WILEY-LISS	VETERINARY SCIENCES; ZOOLOGY	VANSTREELS, RALPH/H-8029-2015 CEPEMA, INCT/I-2429-2013	NA	6	IMPACTS OF ANIMAL TRAFFIC ON THE BRAZILIAN AMAZON PARROTS (AMAZONA SPECIES) COLLECTION OF THE QUINZINHO DE BARROS MUNICIPAL ZOOLOGICAL PARK, BRAZIL, 1986-2007	ARTICLE	0	29	29	VETERINARY SCIENCES; ZOOLOGY
ISI000284195400023	rejected off topic illegal trade	JRFP	SNYDER NFR, 2010, AUK	SNYDER NFR;BUDNEY GF;INIGO-ELIAS EE	NA	NA	SNYDER, NFR (CORRESPONDING AUTHOR), POB 16426, PORTAL, AZ 85632 USA.; BUDNEY, GREGORY F.; INIGO-ELIAS, EDUARDO E., CORNELL LAB ORNITHOL, ITHACA, NY 14850 USA.	NA	ORNITHOLOGICAL SOC NORTH AMER PO BOX 1897, LAWRENCE, KS 66044-8897 USA	NA	NFRS16426@VTC.NET	NA	NA	NA	2020-10-23	679XZ	10.1525/auk.2010.10084	NA	NA	NA	NA	NA	NA	NA	NA	0004-8038	AUK	AUK	ENGLISH	NA	OCT	NA	10	4	GREEN PUBLISHED	NA	NA	948-951	AMER ORNITHOLOGISTS UNION	ZOOLOGY	NA	NA	2	EVALUATION OF THE NELSON CAROLINA PARAKEET FILM	EDITORIAL MATERIAL	0	7	127	ORNITHOLOGY
ISI000284457100004	rejected off topic parrots	JRFP	CABRERA N, 2010, ZOOTAXA	CABRERA N;CABRERA WALSH G	CHRYSOMELIDAE; GALERUCINAE; DIABROTICA COLLICOLA; ARGENTINA; SYSTEMATICS	LUPERINI COLEOPTERA; MITOCHONDRIAL; GALERUCINAE	CABRERA, N (CORRESPONDING AUTHOR), MUSEO LA PLATA, DIV ENTOMOL, PASEO BOSQUE S-N, RA-1900 LA PLATA, ARGENTINA.; CABRERA, NORA, MUSEO LA PLATA, DIV ENTOMOL, RA-1900 LA PLATA, ARGENTINA.; CABRERA WALSH, GUILLERMO, USDA ARS, S AMER BIOL CONTROL LAB, BUENOS AIRES, DF, ARGENTINA.	THE NEW SPECIES DIABROTICA COLLICOLA CABRERA \& CABRERA WALSH IS DESCRIBED AND ILLUSTRATED BASED ON SPECIMENS COLLECTED FROM BALCOZNA, CATAMARCA PROVINCE (ARGENTINA). A FULL DESCRIPTION IS PROVIDED AND INCLUDES ADDING MORPHOLOGICAL CHARACTERS OF THE MOUTHPARTS, HIND WING VENATION, BINDING PATCH, METENDOSTERNITE, AND DETAILS OF MALE AND FEMALE GENITALIA PREVIOUSLY OVERLOOKED FOR THE GENUS. DIABROT…	PO BOX 41383, AUCKLAND, ST LUKES 1030, NEW ZEALAND	NA	NCABRERA@MUSEO.FCNYM.UNLP.EDU.AR GCABRERA@SPEEDY.COM.AR	NA	NA	NA	2020-10-23	683FM	NA	NA	NA	1175-5334	NA	NA	CONSEJO NACIONAL DE INVESTIGACIONES CIENTIFICAS Y TECNICAS (CONICET-PIP)CONSEJO NACIONAL DE INVESTIGACIONES CIENTIFICAS Y TECNICAS (CONICET) [5486]	WE ARE GRATEFUL TO A. S. KONSTANTINOV (USDA/ARS SYSTEMATIC ENTOMOLOGY LABORATORY, SMITHSONIAN NATIONAL MUSEUM OF NATURAL HISTORY, WASHINGTON, D. C.), D. G. FURTH (DEPARTMENT OF SYSTEMATIC BIOLOGY, SMITHSONIAN INSTITUTION, WASHINGTON, D. C.), AND V. SAVINI (MUSEO DEL INSTITUTO DE ZOOLOGIA AGRICOLA FRANCISCO FERNANDEZ YEPEZ, UNIVERSIDAD CENTRAL DE VENEZUELA, MARACAY) FOR LOANING US MANY MUSEUM SPEC…	NA	1175-5326	ZOOTAXA	ZOOTAXA	ENGLISH	NA	NOV 22	NA	17	2683	NA	NA	NA	45-55	MAGNOLIA PRESS	ZOOLOGY	NA	NA	3	DIABROTICA COLLICOLA (COLEOPTERA: CHRYSOMELIDAE), A NEW SPECIES OF LEAF BEETLE FROM ARGENTINA AND KEY TO SPECIES OF THE DIABROTICA VIRGIFERA GROUP AND RELATIVES	ARTICLE	0	1	NA	ZOOLOGY
ISI000285201900004	included in review	Ada Sanchez	PALOMERA-GARCIA C, 2010, STUD NEOTROP FAUNA ENVIRON	PALOMERA-GARCIA C	ARATINGA CANICULARIS; DIET; HABITAT USE; NEST-SITE CHARACTERISTICS;; POACHING; MEXICO	ARBOREAL TERMITARIA; PARROTS; CONSERVATION; SELECTION; PATTERNS;; ECOLOGY; FORESTS; BIRDS; DIET	PALOMERA-GARCIA, C (CORRESPONDING AUTHOR), SIMON FRASER UNIV, DEPT BIOL SCI, BURNABY, BC V5A 1S6, CANADA.; PALOMERA-GARCIA, CARLOS, UNIV GUADALAJARA, DEPT ECOL \& RECURSOS NAT, CTR UNIV COSTA SUR, AUTLAN DE NAVARRO, JAL, MEXICO.	ORANGE-FRONTED PARAKEETS ARATINGA CANICULARIS ARE WIDESPREAD AND COMMON ACROSS THEIR RANGE. HOWEVER, THE ECOLOGY AND HABITAT USE ARE SCARCELY KNOWN. OBSERVATIONS OF THE NEST SITE CHARACTERISTICS, DIET, FLOCK SIZE, HABITAT MOVEMENTS, AND LOCAL HARVESTING PRACTICES ARE REPORTED IN THIS STUDY FOR COLIMA, MEXICO, A SITE WHERE THE SPECIES OCCURS YEAR-ROUND. CHARACTERISTICS OF TERMITARIA NEST SITES IN …	2-4 PARK SQUARE, MILTON PARK, ABINGDON OR14 4RN, OXON, ENGLAND	PII 930991032	CPALOMERA@CUCSUR.UDG.MX	NA	NA	NA	2020-10-23	693CJ	10.1080/01650521.2010.523292	NA	NA	1744-5140	NA	NA	NA	NA	NA	0165-0521	STUD. NEOTROP. FAUNA ENVIRON.	STUDIES ON NEOTROPICAL FAUNA AND ENVIRONMENT	ENGLISH	NA	NA	NA	38	3	NA	NA	NA	139-147	TAYLOR \& FRANCIS LTD	ZOOLOGY	NA	NA	2	HABITAT USE AND LOCAL HARVESTING PRACTICES OF THE ORANGE-FRONTED PARAKEET (ARATINGA CANICULARIS) IN WESTERN MEXICO	ARTICLE	1	8	45	ZOOLOGY
ISI000285419500001	rejected off topic parrots	Ada Sanchez	NAMOFF S, 2011, J HERED	NAMOFF S;VELOZ A;JIMENEZ RA;PEGUERO B;LEWIS J;ABDO M;MAUNDER M;VON WETTBERG E;MEEROW AW;GRIFFITH MP;FRANCISCO-ORTEGA J	ARECACEAE; BIODIVERSITY HOTSPOTS; CARIBBEAN; ETHNOBOTANY; HISPANIOLA; IN; SITU CONSERVATION; PROTECTED AREAS; SSRS; TROPICAL ISLANDS; SUGAR PALMS	BACTRIS-GASIPAES; MATING SYSTEM; MICROSATELLITE; ARECACEAE; POPULATIONS;; DIVERSITY; ASTERACEAE; SOFTWARE; PATTERNS; DISTANCE	FRANCISCO-ORTEGA, J (CORRESPONDING AUTHOR), FAIRCHILD TROP BOT GARDEN, CTR TROP PLANT CONSERVAT, MIAMI, FL 33156 USA.; NAMOFF, SANDRA; LEWIS, CARL; MOYNIHAN, JEREMY; ABDO, MELISSA; MAUNDER, MIKE; VON WETTBERG, ERIC; FRANCISCO-ORTEGA, JAVIER, FAIRCHILD TROP BOT GARDEN, CTR TROP PLANT CONSERVAT, MIAMI, FL 33156 USA.; MOYNIHAN, JEREMY; MAUNDER, MIKE; VON WETTBERG, ERIC; FRANCISCO-ORTEGA, JAVIER, FLO…	PSEUDOPHOENIX EKMANII IS A THREATENED PALM SPECIES ENDEMIC TO THE DOMINICAN REPUBLIC. SAP FROM TREES IS EXTRACTED TO MAKE A LOCAL DRINK; ONCE THEY ARE TAPPED THE INDIVIDUAL USUALLY DIES. PLANTS ARE ALSO ILLEGALLY HARVESTED FOR THE NURSERY TRADE AND DESTROYED BY POACHERS HUNTING THE ENDEMIC AND THREATENED HISPANIOLAN PARROT. WE USED 7 DNA MICROSATELLITE MARKERS TO ASSIST LAND MANAGERS IN DEVELOPIN…	JOURNALS DEPT, 2001 EVANS RD, CARY, NC 27513 USA	NA	ORTEGAJ@FIU.EDU	NA	NA	NA	2020-10-23	696CM	10.1093/jhered/esq118	NA	NA	1465-7333	NA	NA	MOHAMED BIN ZAYED SPECIES CONSERVATION FUND [0925390]; LOUIS J. SKINNER FOUNDATION; BACHELOR FOUNDATION SUPPORT FOR THE RARE EVENT OF FAIRCHILD TROPICAL BOTANIC GARDEN; JARDIN BOTANICO NACIONAL (DOMINICAN REPUBLIC); FAIRCHILD TROPICAL BOTANIC GARDEN	MOHAMED BIN ZAYED SPECIES CONSERVATION FUND (GRANT NUMBER 0925390); THE LOUIS J. SKINNER FOUNDATION; THE BACHELOR FOUNDATION SUPPORT FOR THE RARE EVENT OF FAIRCHILD TROPICAL BOTANIC GARDEN (2008); JARDIN BOTANICO NACIONAL (DOMINICAN REPUBLIC); FAIRCHILD TROPICAL BOTANIC GARDEN.	NA	0022-1503	J. HERED.	JOURNAL OF HEREDITY	ENGLISH	NA	JAN-FEB	NA	72	1	BRONZE	VON WETTBERG, ERIC/0000-0002-2724-0317 MEEROW, ALAN/0000-0003-1882-8327	NA	1-10	OXFORD UNIV PRESS INC	EVOLUTIONARY BIOLOGY; GENETICS \& HEREDITY	VON WETTBERG, ERIC/C-1115-2016 MEEROW, ALAN/U-9019-2019	NA	14	SWEET DRINKS ARE MADE OF THIS: CONSERVATION GENETICS OF AN ENDEMIC PALM SPECIES FROM THE DOMINICAN REPUBLIC	ARTICLE	0	18	102	EVOLUTIONARY BIOLOGY; GENETICS \& HEREDITY
ISI000287291900013	included in review	Ada Sanchez	DE LABRA MA, 2010, ORNITOL NEOTROP	DE LABRA MA;ESCALANTE P;MONTERRUBIO RICO TC;COATES-ESTRADA R	PSITTACIDAE; ABUNDANCE; TROPICAL EVERGREEN FOREST; HABITAT USE;; FRAGMENTATION; SPECIES LOSS; CONSERVATION	LILAC-CROWNED PARROT; FOREST; BIRDS; RICHNESS	DE LABRA, MA (CORRESPONDING AUTHOR), UNIV MICHOACANA, FAC BIOL, EDITICIO R,CIUDAD UNIV, MORELIA 58194, MICHOACAN, MEXICO.; DE LABRA, MIGUEL A.; MONTERRUBIO RICO, TIBERIO C., UNIV MICHOACANA, FAC BIOL, MORELIA 58194, MICHOACAN, MEXICO.; ESCALANTE, PATRICIA, UNIV NACL AUTONOMA MEXICO, INST BIOL, MEXICO CITY 045110, DF, MEXICO.; COATES-ESTRADA, ROSAMOND, UNIV NACL AUTONOMA MEXICO, INST BIOL, ESTN BI…	HABITAT, ABUNDANCE AND CONSERVATION PERSPECTIVES OF PARROTS AT LOS TUXTLAS BIOSPHERE RESERVE, VERACRUZ, MEXICO. - DURING THE YEARS OF 2008-2010, WE ASSESSED THE CONSERVATION STATUS OF PARROT SPECIES IN LOS TUXTLAS, VERACRUZ, SOUTHEAST MEXICO, OBTAINING DATA ON ABUNDANCE, HABITAT USE AND DATE OF PET TRADE. DURING OUR FIELD STUDIES, WE VISITED SITES THAT INCLUDED ALL THE TERRESTRIAL HABITATS IN THE…	UNIV GEORGIA, WARNELL SCH FOREST RESOURCES, ATHENS, GA 30602-2152 USA	NA	ARAMILITARIS77@YAHOO.COM.MX	NA	NA	NA	2020-10-23	720PF	NA	NA	NA	NA	NA	NA	NA	NA	NA	1075-4377	ORNITOL. NEOTROP.	ORNITOLOGIA NEOTROPICAL	SPANISH	NA	NA	NA	42	4	NA	DE LABRA-HERNANDEZ, MIGUEL ANGEL/0000-0002-0361-4919 ESCALANTE, PATRICIA/0000-0002-5531-263X COATES, ROSAMOND/0000-0003-0074-1565	NA	599-610	NEOTROPICAL ORNITHOLOGICAL SOC, USGS PATUXENT WILDLIFE RESEARCH CTR	ZOOLOGY	DE LABRA-HERNANDEZ, MIGUEL ANGEL/D-1852-2017 ESCALANTE, PATRICIA/B-8704-2014	NA	5	HABITAT, ABUNDANCE AND CONSERVATION PERSPECTIVES OF PARROTS AT LOS TUXTLAS BIOSPHERE RESERVE, VERACRUZ, MEXICO	ARTICLE	0	24	21	ORNITHOLOGY
ISI000287826400006	rejected off topic illegal trade	Ada Sanchez	CRAY C, 2011, CLIN LAB MED	CRAY C	ASPERGILLOSIS; AVIAN; BIRD; BORNAVIRUS; CHLAMYDOPHILOSIS;; MYCOBACTERIOSIS	POLYMERASE-CHAIN-REACTION; CHLAMYDOPHILA-PSITTACI INFECTIONS;; PROVENTRICULAR DILATATION DISEASE; LINKED-IMMUNOSORBENT-ASSAY; AVIUM; SUBSP-AVIUM; MYCOBACTERIUM-AVIUM; CHLAMYDIA-PSITTACI;; ASPERGILLUS-FUMIGATUS; AVIAN BORNAVIRUS; PROTEIN ELECTROPHORESIS	CRAY, C (CORRESPONDING AUTHOR), UNIV MIAMI, MILLER SCH MED, DEPT PATHOL, DIV COMPARAT PATHOL, POB 016960 R-46, MIAMI, FL 33101 USA.; UNIV MIAMI, MILLER SCH MED, DEPT PATHOL, DIV COMPARAT PATHOL, MIAMI, FL 33101 USA.	PET BIRD OWNERSHIP AND THE VETERINARY DIAGNOSTIC MARKET FOR AVIAN AND EXOTIC SPECIES TESTING HAVE GROWN MARKEDLY DURING THE PAST 20 YEARS. BIRDS PRESENT WITH BOTH UNIQUE INFECTIOUS DISEASES AND OTHER DISEASES THAT ARE KNOWN TO THE HUMAN MEDICAL COMMUNITY, INCLUDING ASPERGILLOSIS, MYCOBACTERIOSIS, CHLAMYDOPHILOSIS, AND BORNAVIRUS INFECTION, SOME OF WHICH HAVE CLEAR ZOONOTIC IMPLICATIONS. ALTHOUGH …	1600 JOHN F KENNEDY BOULEVARD, STE 1800, PHILADELPHIA, PA 19103-2899 USA	NA	C.CRAY@MIAMI.EDU	NA	NA	NA	2020-10-23	727TW	10.1016/j.cll.2010.10.008	NA	NA	1557-9832	NA	NA	NA	NA	NA	0272-2712	CLIN. LAB. MED.	CLINICS IN LABORATORY MEDICINE	ENGLISH	NA	MAR	NA	92	1	NA	CRAY, CAROLYN/0000-0002-7180-153X	NA	71	W B SAUNDERS CO-ELSEVIER INC	MEDICAL LABORATORY TECHNOLOGY	NA	NA	6	INFECTIOUS AND ZOONOTIC DISEASE TESTING IN PET BIRDS	ARTICLE	1	24	31	MEDICAL LABORATORY TECHNOLOGY
ISI000288045000008	rejected off topic illegal trade	Ada Sanchez	SMITH KA, 2011, J EXOT PET MED	SMITH KA;CAMPBELL CT;MURPHY MG;TENGELSEN LA	AVIAN CHLAMYDIOSIS; BIRDS; CHLAMYDOPHILA PSITTACI; HUMANS; PSITTACOSIS	PLASMA-CONCENTRATIONS; CHLORTETRACYCLINE; DOXYCYCLINE; CHEMOTHERAPY;; BLOOD; WATER	SMITH, KA (CORRESPONDING AUTHOR), OHIO DEPT HLTH, POB 1430, REYNOLDSBURG, OH 43068 USA.	PSITTACOSIS, ALSO KNOWN AS PARROT FEVER AND ORNITHOSIS, IS A BACTERIAL INFECTION OF HUMANS THAT CAN CAUSE SEVERE PNEUMONIA AND OTHER SERIOUS HEALTH PROBLEMS. IT IS CAUSED BY CHLAMYDOPHILA PSITTACI, FORMERLY KNOWN AS CHLAMYDIA PSITTACI. FROM 2005 THROUGH 2009, 66 HUMAN CASES OF PSITTACOSIS WERE REPORTED TO THE CENTERS FOR DISEASE CONTROL AND PREVENTION THROUGH THE NATIONALLY NOTIFIABLE DISEASES SU…	STE 800, 230 PARK AVE, NEW YORK, NY 10169 USA	NA	KATHY.SMITH@ODH.OHIO.GOV	NA	NA	NA	2020-10-23	730PA	10.1053/j.jepm.2010.11.007	NA	NA	1931-6283	NA	NA	NA	NA	NA	1557-5063	J. EXOT. PET MED.	JOURNAL OF EXOTIC PET MEDICINE	ENGLISH	NA	JAN	NA	26	1	NA	NA	NA	32-45	ELSEVIER SCIENCE INC	VETERINARY SCIENCES	NA	NA	22	COMPENDIUM OF MEASURES TO CONTROL CHLAMYDOPHILA PSITTACI INFECTION AMONG HUMANS (PSITTACOSIS) AND PET BIRDS (AVIAN CHLAMYDIOSIS), 2010 NATIONAL ASSOCIATION OF STATE PUBLIC HEALTH VETERINARIANS (NASPHV)	REVIEW	0	31	20	VETERINARY SCIENCES
ISI000288085200008	included in review	Ada Sanchez	GASTANAGA M, 2011, BIRD CONSERV INT	GASTANAGA M;MACLEOD R;HENNESSEY B;UGARTE;NUNEZ J;PUSE E;ARRASCUE A;HOYOS J;MALDONADO CHAMBI W;VASQUEZ J;ENGBLOM G	NA	NA	GASTANAGA, M (CORRESPONDING AUTHOR), ASOCIAC ARMONIA BIRDLIFE INT, AV LOMAS DE ARENA 400,CASILLA 3566, SANTA CRUZ, BOLIVIA.; GASTANAGA, MELVIN; HENNESSEY, BENNETT; PUSE, EDEVALY; ARRASCUE, ANITA; HOYOS, JOHANA; VASQUEZ, JIMMY; ENGBLOM, GUNAR, ASOCIAC ARMONIA BIRDLIFE INT, SANTA CRUZ, BOLIVIA.; MACLEOD, ROSS, UNIV GLASGOW, INST BIOMED \& LIFE SCI, DIV ECOL \& EVOLUTIONARY BIOL, GLASGOW G12 8QQ, LA…	DURING A PERIOD OF 12 MONTHS IN 2007 AND 2008, A STUDY OF THE PARROT TRADE WITHIN PERU WAS CARRIED OUT. IN THIS STUDY, 20 MAIN WILDLIFE MARKETS WERE VISITED IN EIGHT CITIES IN ORDER TO ESTIMATE THE NUMBER OF PARROT SPECIES AND INDIVIDUALS TRADED LEGALLY AND ILLEGALLY WITHIN A YEAR. THE STUDY ALSO GATHERED EXTRA INFORMATION FROM VENDORS AND CUSTOMERS THROUGH INFORMAL INTERVIEWS ABOUT THE TRADE PRO…	32 AVENUE OF THE AMERICAS, NEW YORK, NY 10013-2473 USA	NA	PAUXI-P@ARMONIA-BO.ORG	NA	NA	NA	2020-10-23	731CZ	10.1017/S0959270910000249	NA	NA	NA	NA	NA	CHESTER ZOO; LORO PARQUE FUNDACION	THIS STUDY WOULD NOT HAVE BEEN POSSIBLE WITHOUT THE SUPPORT OF CHESTER ZOO AND THE LORO PARQUE FUNDACION COORDINATED THROUGH THE BIRDLIFE INTERNATIONAL PREVENTING EXTINCTIONS PROGRAMME. WE WOULD LIKE TO THANK ALL THE PEOPLE AT ASOCIACION ARMONIA (BIRDLIFE BOLIVIA) FOR THEIR SUPPORT THAT MADE THIS WORK POSSIBLE, WITH SPECIAL THANKS TO MAURICIO HERRERA. SPECIAL THANKS TO PIERINA BERMEJO, LADY CAJO,…	NA	0959-2709	BIRD CONSERV. INT.	BIRD CONSERVATION INTERNATIONAL	ENGLISH	NA	MAR	NA	10	1	BRONZE	UGARTE-NUNEZ, JOAQUIN A./0000-0001-6298-1818 ARRASCUE, ANITA/0000-0001-6756-8141	NA	76-85	CAMBRIDGE UNIV PRESS	BIODIVERSITY \& CONSERVATION; ZOOLOGY	NA	NA	30	A STUDY OF THE PARROT TRADE IN PERU AND THE POTENTIAL IMPORTANCE OF INTERNAL TRADE FOR THREATENED SPECIES	ARTICLE	0	58	21	BIODIVERSITY CONSERVATION; ORNITHOLOGY
ISI000288547500006	included in review	Ada Sanchez	PIRES SF, 2011, BR J CRIMINOL	PIRES SF;CLARKE RV	CONSERVATION CRIMINOLOGY; GEOGRAPHIC INFORMATION SYSTEMS (GIS);; ITINERANT FENCES; OPTIMAL FORAGING THEORY; PARROTS; SITUATIONAL; PREVENTION; WILDLIFE POACHING	NESTING SUCCESS; TRADE; CONSERVATION; PROTECTION; AFRICA; LAW	PIRES, SF (CORRESPONDING AUTHOR), RUTGERS STATE UNIV, SCH CRIMINAL JUSTICE, 123 WASHINGTON ST, NEWARK, NJ 07102 USA.; PIRES, STEPHEN F.; CLARKE, RONALD V., RUTGERS STATE UNIV, SCH CRIMINAL JUSTICE, NEWARK, NJ 07102 USA.	DESPITE LEGAL PROHIBITIONS, POACHING OF WILD PARROTS IS WIDESPREAD IN THE NEO-TROPICS, WITH THE RESULT THAT MANY SPECIES ARE NOW ENDANGERED. GUIDED BY OPTIMAL FORAGING THEORY, SECONDARY DATA ARE USED TO INVESTIGATE WHY SOME SPECIES OF BOLIVIAN PARROTS, BUT NOT OTHERS, ARE FOUND IN AN ILLEGAL PET MARKET IN SANTA CRUZ, BOLIVIA. SPECIES COMMONLY FOUND IN THE MARKET MAKE MORE ENJOYABLE PETS, ARE MORE…	GREAT CLARENDON ST, OXFORD OX2 6DP, ENGLAND	NA	RVGCLARKE@AOL.COM	NA	NA	NA	2020-10-23	737CZ	10.1093/bjc/azq074	NA	NA	1464-3529	NA	NA	NA	NA	NA	0007-0955	BR. J. CRIMINOL.	BRITISH JOURNAL OF CRIMINOLOGY	ENGLISH	NA	MAR	NA	34	2	NA	PIRES, STEPHEN/0000-0002-8525-0185	NA	314-335	OXFORD UNIV PRESS	CRIMINOLOGY \& PENOLOGY	NA	NA	64	SEQUENTIAL FORAGING, ITINERANT FENCES AND PARROT POACHING IN BOLIVIA	ARTICLE	0	14	51	CRIMINOLOGY \& PENOLOGY
ISI000289333100003	included in review	Ada Sanchez	MANUEL BRICENO-LINARES J, 2011, BIOL CONSERV	MANUEL BRICENO-LINARES J;PAUL RODRIGUEZ KM;ROJAS-SUAREZ F;ANTONIO;MILLAN P;VITTORI EG;CARRASCO-MUNOZ M	ADAPTIVE MANAGEMENT; ARTIFICIAL NESTS; ASSISTED BREEDING; FOSTER NESTS;; PARROTS; POACHING; THREATENED SPECIES; VENEZUELA	SOCIAL-ECOLOGICAL SYSTEMS; CONSERVATION; NEST; AFRICA; IMPACT; TRADE	RODRIGUEZ, JP (CORRESPONDING AUTHOR), INST VENEZOLANO INVEST CIENT, CTR ECOL, APDO 20632, CARACAS 1020A, VENEZUELA.; PAUL RODRIGUEZ, JON; RODRIGUEZ-CLARK, KATHRYN M., INST VENEZOLANO INVEST CIENT, CTR ECOL, CARACAS 1020A, VENEZUELA.; MANUEL BRICENO-LINARES, JOSE; PAUL RODRIGUEZ, JON; ROJAS-SUAREZ, FRANKLIN; ANTONIO MILLAN, PABLO; VITTORI, ELEONORA G.; CARRASCO-MUNOZ, MAR, PROVITA, CARACAS 1041A, …	THE YELLOW-SHOULDERED PARROT (AMAZONA BARBADENSIS) IS LISTED IN VENEZUELA AS ENDANGERED AND INTERNATIONALLY AS VULNERABLE, PRIMARILY DUE TO POACHING FOR THE ILLEGAL PET TRADE. VARIOUS INTERVENTIONS HAVE BEEN IMPLEMENTED TO REDUCE POACHING (INCREASING THE POPULATION FROM 700 IN 1989 TO 1600 IN 2009), BUT POACHING PRESSURE IS STILL HIGH, AND IS EVER-CHANGING, REQUIRING AN EVOLVING RESPONSE. BETWEEN…	THE BOULEVARD, LANGFORD LANE, KIDLINGTON, OXFORD OX5 1GB, OXON, ENGLAND	NA	JOSEMANUEL.BRICENOLINARES@GMAIL.COM JONPAUL@IVIC.GOB.VE KMRODRIGUEZCLARK@GMAIL.COM FROJAS@PROVITA.ORG.VE	NA	NA	NA	2020-10-23	747PY	10.1016/j.biocon.2010.12.010	NA	NA	1873-2917	NA	NA	LORO PARQUE FUNDACIONWHITLEY LAING FOUNDATION; WORLD LAND TRUST; NEOTROPICAL MIGRATORY BIRD CONSERVATION ACT; BP CONSERVATION PROGRAMME; BERGEN COUNTY ZOOLOGICAL PARK; UNIVERSITY OF QUEENSLAND (HUGH POSSINGHAM, THE ECOLOGY CENTRE)UNIVERSITY OF QUEENSLAND	WE ARE DEEPLY GRATEFUL FOR THE SUPPORT OF OUR PRIMARY SPONSORS DURING 2004-2009: LORO PARQUE FUNDACION, WHITLEY LAING FOUNDATION (CURRENTLY WHITLEY FUND FOR NATURE), WORLD LAND TRUST, NEOTROPICAL MIGRATORY BIRD CONSERVATION ACT, BP CONSERVATION PROGRAMME AND BERGEN COUNTY ZOOLOGICAL PARK. THE TEAM OF BIOMONITORS (EVANS CONTRERAS, ROBERTH FERNANDEZ, CESAR GARCIA, ANGEL LUIS GONZALEZ, JESUS MARIN, …	NA	0006-3207	BIOL. CONSERV.	BIOLOGICAL CONSERVATION	ENGLISH	NA	APR	NA	50	4	NA	RODRIGUEZ, JON PAUL/0000-0001-5019-2870 RODRIGUEZ-CLARK, KATHRYN/0000-0002-1356-9998	NA	1188-1193	ELSEVIER SCI LTD	BIODIVERSITY \& CONSERVATION; ENVIRONMENTAL SCIENCES \& ECOLOGY	RODRIGUEZ, JON PAUL/A-1491-2009	NA	17	ADAPTING TO CHANGING POACHING INTENSITY OF YELLOW-SHOULDERED PARROT (AMAZONA BARBADENSIS) NESTLINGS IN MARGARITA ISLAND, VENEZUELA	ARTICLE	1	26	144	BIODIVERSITY CONSERVATION; ECOLOGY; ENVIRONMENTAL SCIENCES
ISI000290286700015	rejected off topic parrots	Ada Sanchez	TEIXEIRA DM, 2010, SER LIVROS MUS NAC	TEIXEIRA DM;PAPAVERO N	PRIMATES; ANIMAL TRADE; COLONIAL BRAZIL; HISTORY OF ZOOLOGY;; CONSERVATION	NA	TEIXEIRA, DM (CORRESPONDING AUTHOR), UNIV FED RIO DE JANEIRO, MUSEU NACL, RIO DE JANEIRO, BRAZIL.; TEIXEIRA, DANTE MARTINS, UNIV FED RIO DE JANEIRO, MUSEU NACL, RIO DE JANEIRO, BRAZIL.; TEIXEIRA, DANTE MARTINS; PAPAVERO, NELSON, UNIV SAO PAULO, SAO PAULO, BRAZIL.	THE BRAZILIAN PRIMATE TRADE IN THE 16(TH) AND 17(TH) CENTURIES. ALTHOUGH MENTIONED WITH A CERTAIN FREQUENCY IN 16TH AND 17TH CENTURIES' DOCUMENTS, THE ANIMAL TRADE IN COLONIAL BRAZIL HAS NEVER ATTRACTED THE ATTENTION OF SPECIALISTS, BEING CONSIDERED AN INSIGNIFICANT AND ALMOST ANECDOTIC EVENT IN THE FIRST YEARS OF BRAZILIAN HISTORY. AN ANALYSIS OF DOCUMENTS FROM THOSE TWO CENTURIES, HOWEVER, HAS …	QUINTA DA BOA VISTA, SAO CRISTOVAO, RIO DE JANEIRO, RJ 20940-040, BRAZIL	NA	DANTE.TEIXEIRA@PQ.CNPQ.BR NELSONPAPAVERO@GMAIL.COM	NA	NA	MAMIFEROS DE RESTINGAS E MANGUEAIS DO BRASIL	2020-10-23	BUT69	NA	NA	PESSOA, LM AND TAVARES, WE AND SICILIANO, S	NA	NA	NA	NA	NA	978-85-63705-00-6	NA	SER. LIVROS MUS. NAC.	MAMIFEROS DE RESTINGAS E MANGUEAIS DO BRASIL	PORTUGUESE	NA	NA	NA	132	NA	NA	NA	NA	253-282	MUSEU NACIONAL-UNIV FEDERAL DO RIO DE JANEIRO	LIFE SCIENCES \& BIOMEDICINE - OTHER TOPICS	NA	SERIE LIVROS DO MUSEU NACIONAL	4	THE BRAZILIAN PRIMATE TRADE IN THE 16(TH) AND 17(TH) CENTURIES.	ARTICLE; BOOK CHAPTER	0	5	39	BIOLOGY
ISI000290407400003	rejected off topic illegal trade	Ada Sanchez	BOCHMANN M, 2011, VET RADIOL ULTRASOUND	BOCHMANN M;LUDEWIG E;KRAUTWALD-JUNGHANNS ME;PEES M	BIRD; DIGITAL RADIOGRAPHY; IMAGE QUALITY; MAMMOGRAPHY	STORAGE PHOSPHOR SYSTEM; COMPUTED RADIOGRAPHY; VGC ANALYSIS; CHEST; DOGS	PEES, M (CORRESPONDING AUTHOR), UNIV LEIPZIG, VET TEACHING HOSP, CLIN BIRDS \& REPTILES, TIERKLINIKEN 17, D-04103 LEIPZIG, GERMANY.; BOCHMANN, MONIKA; KRAUTWALD-JUNGHANNS, MARIA-ELISABETH; PEES, MICHAEL, UNIV LEIPZIG, VET TEACHING HOSP, CLIN BIRDS \& REPTILES, D-04103 LEIPZIG, GERMANY.; LUDEWIG, EBERHARD, UNIV LEIPZIG, VET TEACHING HOSP, DEPT SMALL ANIM MED, D-04103 LEIPZIG, GERMANY.	A CONVENTIONAL HIGH-RESOLUTION SCREEN-FILM SYSTEM WAS COMPARED WITH A DIGITAL DETECTOR SYSTEM. A TOTAL OF 20 BIRDS (14 PIGEONS AND SIX PSITTACINE BIRDS) WITH AN AVERAGE BODY MASS OF 533 G WERE EXAMINED IN DORSOVENTRAL AS WELL AS LATERAL PROJECTIONS. DIGITAL RADIOGRAPHS WERE ACQUIRED WITH THE SAME MAS AS WELL AS HALF THE MAS USED FOR THE CONVENTIONAL RADIOGRAPHS. THREE CRITERIA AND ONE OVERALL ASS…	COMMERCE PLACE, 350 MAIN ST, MALDEN 02148, MA USA	NA	PEES@VOGELKLINIK.UNI-LEIPZIG.DE	NA	NA	NA	2020-10-23	761ON	10.1111/j.1740-8261.2011.01801.x	NA	NA	NA	NA	NA	NA	NA	NA	1058-8183	VET. RADIOL. ULTRASOUND	VETERINARY RADIOLOGY \& ULTRASOUND	ENGLISH	NA	MAY-JUN	NA	25	3	NA	PEES, MICHAEL/0000-0002-7244-9697	NA	256-261	WILEY-BLACKWELL	VETERINARY SCIENCES	NA	NA	6	COMPARISON OF THE IMAGE QUALITY OF A HIGH-RESOLUTION SCREEN-FILM SYSTEM AND A DIGITAL FLAT PANEL DETECTOR SYSTEM IN AVIAN RADIOGRAPHY	ARTICLE	0	6	52	VETERINARY SCIENCES
ISI000290442300013	rejected off topic illegal trade	Ada Sanchez	JUAN-SALLES C, 2011, VET PATHOL	JUAN-SALLES C;SOTO S;GARNER MM;MONTESINOS M	AFRICAN GREY PARROT; CARDIOMYOPATHY; CONGESTIVE HEART FAILURE; PASSIVE; CONGESTION; THYROID FOLLICULAR HYPERPLASIA; THYROIDITIS	INDUCED PULMONARY-HYPERTENSION; TURKEY MELEAGRIS-GALLOPAVO;; BROILER-CHICKENS; GRAVES-DISEASE; ANIMAL-MODEL; CARDIOMYOPATHY;; MYOCARDITIS; ASCITES; ENCEPHALITIS; THYROIDITIS	JUAN-SALLES, C (CORRESPONDING AUTHOR), CONCEPC ARENAL 43-45,6 1A, BARCELONA 08027, SPAIN.; JUAN-SALLES, C., CONZOOLTING WILDLIFE MANAGEMENT, BARCELONA, SPAIN.; SOTO, S., UNIV AUTONOMA BARCELONA, FAC VET, UD HISTOL \& ANAT PATOL, BELLATERRA, SPAIN.; GARNER, M. M., NW ZOOPATH, MONROE, LA USA.; MONTESINOS, A.; ARDIACA, M., CV LOS SAUCES, MADRID, SPAIN.	SIX AFRICAN GREY PARROTS (PSITTACUS E ERITHACUS) WERE DIAGNOSED WITH CARDIOMYOPATHY AND CONGESTIVE HEART FAILURE BASED ON GROSS AND MICROSCOPIC FINDINGS. AGES RANGED FROM 15 DAYS TO 8 YEARS, AND 5 OF 6 PARROTS WERE EITHER NEONATES OR JUVENILES AT THE TIME OF DIAGNOSIS. TWO NEONATES AND 2 JUVENILES CAME FROM THE SAME BREEDING AVIARY; THE 2 JUVENILES WERE BORN TO THE SAME BREEDING PAIR. THE 2 OTHER…	2455 TELLER RD, THOUSAND OAKS, CA 91320 USA	NA	CJUANSALLES@YAHOO.COM	NA	NA	NA	2020-10-23	761ZP	10.1177/0300985810377071	NA	NA	NA	NA	NA	NA	NA	NA	0300-9858	VET. PATHOL.	VETERINARY PATHOLOGY	ENGLISH	NA	MAY	NA	29	3	NA	NA	NA	691-697	SAGE PUBLICATIONS INC	PATHOLOGY; VETERINARY SCIENCES	NA	NA	1	CONGESTIVE HEART FAILURE IN 6 AFRICAN GREY PARROTS (PSITTACUS E ERITHACUS)	ARTICLE	0	13	48	PATHOLOGY; VETERINARY SCIENCES
ISI000290771700003	rejected overview	Ada Sanchez	PIRES SF, 2011, EUR J CRIM POLICY RES	PIRES SF;MORETO WD	CONSERVATION CRIMINOLOGY; SITUATIONAL CRIME PREVENTION; TRAGEDY OF THE; COMMONS; WILDLIFE CRIMES; WILDLIFE TRADE	SOUTH-AFRICA; TRADE; DISPLACEMENT; PROTECTION; CONFLICT; PARROTS;; MARKET; IMPACT; NEST	PIRES, S (CORRESPONDING AUTHOR), RUTGERS STATE UNIV, SCH CRIMINAL JUSTICE, NEWARK, NJ 07102 USA.; PIRES, STEPHEN F.; MORETO, WILLIAM D., RUTGERS STATE UNIV, SCH CRIMINAL JUSTICE, NEWARK, NJ 07102 USA.	THE `TRAGEDY OF THE COMMONS' DILEMMA OCCURS WHEN INDIVIDUALS WORKING INDEPENDENTLY OF ONE ANOTHER, WILL OVERUSE A COMMON-PROPERTY RESOURCE FOR SHORT-TERM BENEFITS WHILE DECIMATING THE RESOURCE FOR LONG-TERM USE (HARDIN 1968). THIS IS OFTEN FOUND IN THE FIELD OF WILDLIFE CRIMES WHERE SPECIES BECOME OVEREXPLOITED TO INCREASE SHORT-TERM PROFITS WHILE ENDANGERING AND ELIMINATING A NATURAL RESOURCE FO…	VAN GODEWIJCKSTRAAT 30, 3311 GZ DORDRECHT, NETHERLANDS	NA	STEPHEN.PIRES@GMAIL.COM WMORETO@ANDROMEDA.RUTGERS.EDU	NA	NA	NA	2020-10-23	766HN	10.1007/s10610-011-9141-3	NA	NA	1572-9869	NA	NA	NA	NA	NA	0928-1371	EUR. J. CRIM. POLICY RES.	EUROPEAN JOURNAL ON CRIMINAL POLICY AND RESEARCH	ENGLISH	NA	JUN	NA	104	2	NA	PIRES, STEPHEN/0000-0002-8525-0185	NA	101-123	SPRINGER	CRIMINOLOGY \& PENOLOGY	NA	NA	75	PREVENTING WILDLIFE CRIMES: SOLUTIONS THAT CAN OVERCOME THE `TRAGEDY OF THE COMMONS'	ARTICLE	3	117	17	CRIMINOLOGY \& PENOLOGY
ISI000290776800006	rejected off topic illegal trade	JRFP	COLBERT-WHITE EN, 2011, J COMP PSYCHOL	COLBERT-WHITE EN;COVINGTON MA;FRAGASZY DM	AFRICAN GREY PARROT; SPEECH; VOCALIZATION; SOCIAL CONTEXT; CONTACT CALL	COMMUNICATION; ACQUISITION; EVOLUTION; MIMICRY; SPEECH; BONDS	COLBERT-WHITE, EN (CORRESPONDING AUTHOR), UNIV GEORGIA, DEPT PSYCHOL, ATHENS, GA 30602 USA.; COLBERT-WHITE, ERIN N.; FRAGASZY, DOROTHY M., UNIV GEORGIA, DEPT PSYCHOL, ATHENS, GA 30602 USA.; COVINGTON, MICHAEL A., UNIV GEORGIA, INST ARTIFICIAL INTELLIGENCE, ATHENS, GA 30602 USA.	HOME-RAISED AFRICAN GREY PARROTS (PSITTACUS ERITHACUS ERITHACUS) EXHIBIT STRONG SOCIAL BONDING WITH THEIR HUMAN COMPANIONS. WE EXAMINED HOW 1 PARROT'S VOCAL PRODUCTION (SPEECH AND NONWORD SOUNDS) CHANGED WITH SOCIAL CONTEXT WITH RESPECT TO DESCRIPTIVE MEASURES OF THE VOCALIZATIONS AND THEIR THEMATIC CONTENT. WE VIDEOTAPED THE PARROT IN 4 SOCIAL CONDITIONS: SUBJECT HOME ALONE, SUBJECT AND OWNER IN…	750 FIRST ST NE, WASHINGTON, DC 20002-4242 USA	NA	COLBERE@UGA.EDU	NA	NA	NA	2020-10-23	766IW	10.1037/a0022097	NA	NA	NA	NA	NA	NA	NA	NA	0735-7036	J. COMP. PSYCHOL.	JOURNAL OF COMPARATIVE PSYCHOLOGY	ENGLISH	NA	MAY	NA	23	2	GREEN PUBLISHED	NA	NA	175-184	AMER PSYCHOLOGICAL ASSOC	BEHAVIORAL SCIENCES; PSYCHOLOGY; ZOOLOGY	NA	NA	13	SOCIAL CONTEXT INFLUENCES THE VOCALIZATIONS OF A HOME-RAISED AFRICAN GREY PARROT (PSITTACUS ERITHACUS ERITHACUS)	ARTICLE	0	38	125	BEHAVIORAL SCIENCES; PSYCHOLOGY; PSYCHOLOGY, MULTIDISCIPLINARY; ZOOLOGY
ISI000290781800007	rejected off topic illegal trade	Ada Sanchez	LIERZ M, 2011, J EXOT PET MED	LIERZ M;FISCHER D	BROKEN FEATHER; FEATHER CLIPPING; IMPING; PSITTACINES; RAPTORS; TRAUMA	FEATHER PLUCKING; PSITTACINE BIRDS	LIERZ, M (CORRESPONDING AUTHOR), UNIV GIESSEN, CLIN BIRDS REPTILES AMPHIBIANS \& FISH, FRANKFURTER STR 91-93, D-35392 GIESSEN, GERMANY.; LIERZ, MICHAEL; FISCHER, DOMINIK, UNIV GIESSEN, CLIN BIRDS REPTILES AMPHIBIANS \& FISH, D-35392 GIESSEN, GERMANY.	BIRDS OFTEN ARE PRESENTED WITH DAMAGED FLIGHT FEATHERS TO VETERINARY PRACTICES THAT TREAT AVIAN SPECIES. PET BIRDS WILL HAVE TRAUMATIZED, SELF-DAMAGED, OR DISEASED FEATHERS. ADDITIONALLY, DAMAGED FLIGHT AND/OR TAIL FEATHERS ARE REGULARLY DIAGNOSED IN INJURED OR DEBILITATED FREE-RANGING BIRDS. IN MANY CASES IN WHICH FEATHER DAMAGE IS DIAGNOSED, IMPING OF THE DAMAGED FEATHERS IS AN EASY TECHNIQUE O…	360 PARK AVE SOUTH, NEW YORK, NY 10010-1710 USA	NA	MICHAEL.LIERZ@VETMED.UNI-GIESSEN.DE	NA	NA	NA	2020-10-23	766KU	10.1053/j.jepm.2011.02.008	NA	NA	NA	NA	NA	NA	NA	NA	1557-5063	J. EXOT. PET MED.	JOURNAL OF EXOTIC PET MEDICINE	ENGLISH	NA	APR	NA	13	2	NA	NA	NA	131-137	ELSEVIER SCIENCE INC	VETERINARY SCIENCES	NA	NA	3	CLINICAL TECHNIQUE: IMPING IN BIRDS	ARTICLE	0	8	20	VETERINARY SCIENCES
ISI000292756000005	rejected off topic illegal trade	Ada Sanchez	GASKINS LA, 2011, J AVIAN MED SURG	GASKINS LA;BERGMAN L	AGGRESSION; FEATHER PICKING; CHRONIC EGG LAYING; SCREAMING; BEHAVIOR;; BIRDS; AVIAN	AGGRESSIVE-BEHAVIOR; SIGNALMENT FACTORS; ANIMAL BOND; DOGS; DIAGNOSES;; SERVICES; TRENDS	GASKINS, LA (CORRESPONDING AUTHOR), ST MATTHEWS UNIV, SCH VET MED, POB 32330 SMB,GRAND CAYMAN KY1-1209, GRAND CAYMAN, CAYMAN ISLANDS.; GASKINS, LORI A., ST MATTHEWS UNIV, SCH VET MED, POB 32330 SMB,GRAND CAYMAN KY1-1209, GRAND CAYMAN, CAYMAN ISLANDS.; BERGMAN, LAURIE, KEYSTONE VET BEHAV SERV, VILLANOVA, PA 19085 USA.	AVIAN VETERINARIANS AND PET BIRD OWNERS WERE SOLICITED TO PARTICIPATE IN ONLINE SURVEYS TO GATHER INFORMATION ABOUT BEHAVIOR PROBLEMS IN PET BIRDS. A TOTAL OF 84 AVIAN VETERINARIANS' AND 203 PSITTACINE BIRD OWNERS' RESPONSES WERE ANALYZED. BEHAVIORS WITH A HIGH PREVALENCE AND A HIGH LEVEL OF OWNER CONCERN, IN DESCENDING ORDER, WERE AGGRESSION, SCREAMING, AND FEATHER PICKING. VETERINARIANS REPORTE…	PO BOX 811720, BOCA RATON, FL 33481 USA	NA	NA	NA	NA	NA	2020-10-23	792OI	10.1647/2010-027.1	NA	NA	1938-2871	NA	NA	NA	NA	NA	1082-6742	J. AVIAN MED. SURG.	JOURNAL OF AVIAN MEDICINE AND SURGERY	ENGLISH	NA	JUN	NA	38	2	NA	NA	NA	111-118	ASSOC AVIAN VETERINARIANS	VETERINARY SCIENCES	NA	NA	17	SURVEYS OF AVIAN PRACTITIONERS AND PET OWNERS REGARDING COMMON BEHAVIOR PROBLEMS IN PSITTACINE BIRDS	ARTICLE	2	43	25	VETERINARY SCIENCES
ISI000293661000039	rejected off topic parrots	Ada Sanchez	CATROXO MHB, 2011, INT J MORPHOL	CATROXO MHB;MARTINS AMCRPF;MELO L;PETRELLA S;FITORRA LS;PETRI BSS	AVIAN CIRCOVIRUS; CANARIES; SICALIS FLAVEOLA SPP.	FEATHER DISEASE VIRUS; NUCLEOTIDE-SEQUENCE ANALYSIS; PSITTACINE BEAK;; ELECTRON-MICROSCOPY; PORCINE CIRCOVIRUS; PLANT CIRCOVIRUSES; INFECTION;; PARTICLES; PIGEON; GULL	CATROXO, MHB (CORRESPONDING AUTHOR), BIOL INST SAO PAULO, RES \& DEV CTR ANIM HLTH, ELECTRON MICROSCOPY LAB, AV CONSELHEIRO RODRIGUES ALVES 1252, BR-04014002 SAO PAULO, BRAZIL.; CATROXO, M. H. B., BIOL INST SAO PAULO, RES \& DEV CTR ANIM HLTH, ELECTRON MICROSCOPY LAB, BR-04014002 SAO PAULO, BRAZIL.; MILANELO, L.; FITORRA, L. S.; PETRI, B. S. S., TIETE ECOL PK, SAO PAULO, BRAZIL.; PETRELLA, S., AD…	CIRCOVIRUS ARE VIRAL AGENTS THAT CAUSE DISEASE IN AVIAN SPECIES. THE MAIN CLINICAL SYMPTOMS OF THE DISEASE ARE IMMUNOSUPPRESSION AND, IN YOUNG BIRDS FEATHER DISORDERS. IN NEONATES, THE DISEASE IS KNOWN AS ``BLACK SPOT'' AND CHARACTERIZED BY ABDOMINAL ENLARGEMENT, HEPATOBILIAR CONGESTION AND FAILURE TO THRIVE. ALSO, IT WAS OBSERVED IN ADULT INFECTED BIRDS WITH OTHER SYMPTOMS AND CLINICAL SIGNS, SU…	CASILLA 54-D, TEMUCO, 00000, CHILE	NA	NA	NA	NA	NA	2020-10-23	804NQ	10.4067/S0717-95022011000200039	NA	NA	NA	NA	NA	NA	NA	NA	0717-9502	INT. J. MORPHOL.	INTERNATIONAL JOURNAL OF MORPHOLOGY	ENGLISH	NA	NA	NA	41	2	OTHER GOLD	NA	NA	537-542	SOC CHILENA ANATOMIA	ANATOMY \& MORPHOLOGY	REBELLO PINTO DA FONSECA MARTINS, ANA MARIA CRISTINA/H-6986-2012	NA	0	ULTRASTRUCTURAL IDENTIFICATION OF CIRCOVIRUS IN THE LIVER OF SAFFRON FINCH (SICALIS FLAVEOLA SPP.)	ARTICLE	1	8	29	ANATOMY \& MORPHOLOGY
ISI000295010300006	rejected off topic illegal trade	Ada Sanchez	GAJDON GK, 2011, INTERACT STUD	GAJDON GK;AMANN L;HUBER L	TOOL USE BEHAVIOUR; SOCIAL LEARNING; REVERSAL LEARNING; PHYSICAL; COGNITION	CALEDONIAN CROWS; IMITATION; CONFORMITY; TRADITIONS; CHILDREN; PARROT;; RAVENS; SPREAD	GAJDON, GK (CORRESPONDING AUTHOR), UNIV VIENNA, DEPT COGNIT BIOL, ALTHANSTR 14, A-1090 VIENNA, AUSTRIA.; GAJDON, GYULA KOPPANY; AMANN, LAURENT; HUBER, LUDWIG, UNIV VIENNA, DEPT COGNIT BIOL, A-1090 VIENNA, AUSTRIA.; GAJDON, GYULA KOPPANY, AUSTRIAN ACAD SCI, KONRAD LORENZ INST ETHOL, A-1010 VIENNA, AUSTRIA.	TO WHAT EXTENT DO KEAS, NESTOR NOTABILIS, LEARN FROM EACH OTHER? WE TESTED EIGHTEEN CAPTIVE KEAS, NEW ZEALAND PARROTS, IN A TOOL USE TASK INVOLVING VISUAL FEATURE DISCRIMINATION AND SOCIAL LEARNING. THE KEAS WERE PRESENTED WITH TWO ADJACENT TUBES, EACH CONTAINING A PHYSICALLY DISTINCT BAITED PLATFORM. ONE PLATFORM COULD BE COLLAPSED BY INSERTION OF A BLOCK INTO THE TUBE TO RELEASE THE BAIT; THE O…	PO BOX 36224, 1020 ME AMSTERDAM, NETHERLANDS	NA	GYULA.GAJDON@UNIVIE.AC.AT A0848411@UNET.UNIVIE.AC.AT LUDWIG.HUBER@UNIVIE.AC.AT	NA	NA	NA	2020-10-23	821YL	10.1075/is.12.2.06gaj	NA	NA	1572-0381	NA	NA	NA	NA	NA	1572-0373	INTERACT. STUD.	INTERACTION STUDIES	ENGLISH	NA	NA	NA	58	2	NA	HUBER, LUDWIG/0000-0002-0217-136X	NA	304-323	JOHN BENJAMINS PUBLISHING CO	COMMUNICATION; LINGUISTICS	NA	NA	15	KEAS RELY ON SOCIAL INFORMATION IN A TOOL USE TASK BUT ABANDON IT IN FAVOUR OF OVERT EXPLORATION	ARTICLE	1	42	12	COMMUNICATION; LINGUISTICS
ISI000295913300034	rejected off topic illegal trade	Ada Sanchez	MACGREGOR-FORS I, 2011, REV MEX BIODIVERS	MACGREGOR-FORS I;CALDERON-PARRA R;MELENDEZ-HERRADA A;LOPEZ-LOPEZ S;SCHONDUBE JE	INVASIVE EXOTIC BIRD; PET TRADE; PEST; URBAN; AGRICULTURE; QUAKER; PARAKEET	SOUTH FLORIDA; UNITED-STATES; HYDE-PARK; POPULATIONS; MANAGEMENT;; CHICAGO	SCHONDUBE, JE (CORRESPONDING AUTHOR), UNIV NACL AUTONOMA MEXICO, LAB ECOL FUNC, CTR INVEST ECOSISTEMAS, CAMPUS MORELIA,APARTADO POSTAL 27-3, MORELIA 58190, MICHOACAN, MEXICO.; MACGREGOR-FORS, IAN; LOPEZ-LOPEZ, SILVIA; SCHONDUBE, JORGE E., UNIV NACL AUTONOMA MEXICO, LAB ECOL FUNC, CTR INVEST ECOSISTEMAS, MORELIA 58190, MICHOACAN, MEXICO.; CALDERON-PARRA, RAFAEL, UNIV AUTONOMA METROPOLITANA, UNIDAD…	THE MONK PARAKEET (MYIOPSITTA MONACHUS) IS NATIVE TO SOUTH AMERICA AND HAS BEEN INTRODUCED BY THE PET MARKET TO SEVERAL COUNTRIES AROUND THE WORLD. IN THIS NOTE, WE COMPILED RECORDS FOR THIS SPECIES IN MEXICO AND REPORT THE FIRST SIGHT-RECORDING OF THIS SPECIES IN THE STATE OF MICHOACAN AND SEVERAL NESTING LOCALITIES WITHIN THE METROPOLITAN AREA OF MEXICO CITY. MOST RECORDS ARE OF INDIVIDUALS ESC…	APARTADO POSTAL 70-233, MEXICO, D F 00000, MEXICO	NA	CHON@OIKOS.UNAM.MX	NA	NA	NA	2020-10-23	833VP	NA	NA	NA	NA	NA	NA	NA	NA	NA	1870-3453	REV. MEX. BIODIVERS.	REVISTA MEXICANA DE BIODIVERSIDAD	ENGLISH	NA	SEP	NA	31	3	DOAJ GOLD	MACGREGOR-FORS, IAN/0000-0003-3198-7322	NA	1053-1056	INST BIOLOGIA, UNIV NACIONAL AUTONOMA MEXICO	BIODIVERSITY \& CONSERVATION	MACGREGOR-FORS, IAN/P-1455-2014	NA	18	PRETTY, BUT DANGEROUS! RECORDS OF NON-NATIVE MONK PARAKEETS (MYIOPSITTA MONACHUS) IN MEXICO	ARTICLE	0	39	82	BIODIVERSITY CONSERVATION
ISI000296874600009	rejected off topic illegal trade	Ada Sanchez	DEMERY ZP, 2011, PROC R SOC B-BIOL SCI	DEMERY ZP;CHAPPELL J;MARTIN GR	PSITTACINES; VISUAL FIELD; EXPLORATION; EXTRACTIVE FORAGING; BILL TIP; ORGAN; TACTILE CUES	VISUAL-FIELDS; PREY-DETECTION; GALLUS-GALLUS; BIRDS; EVOLUTION; BRAIN;; EYE; LATERALITY; MECHANISM; SUGGESTS	DEMERY, ZP (CORRESPONDING AUTHOR), UNIV BIRMINGHAM, CTR ORNITHOL, SCH BIOSCI, BIRMINGHAM B15 2TT, W MIDLANDS, ENGLAND.; DEMERY, ZOE P.; CHAPPELL, JACKIE; MARTIN, GRAHAM R., UNIV BIRMINGHAM, CTR ORNITHOL, SCH BIOSCI, BIRMINGHAM B15 2TT, W MIDLANDS, ENGLAND.	PARROTS ARE EXCEPTIONAL AMONG BIRDS FOR THEIR HIGH LEVELS OF EXPLORATORY BEHAVIOUR AND MANIPULATORY ABILITIES. IT HAS BEEN ARGUED THAT FORAGING METHOD IS THE PRIME DETERMINANT OF A BIRD'S VISUAL FIELD CONFIGURATION. HOWEVER, HERE WE ARGUE THAT THE TOPOGRAPHY OF VISUAL FIELDS IN PARROTS IS RELATED TO THEIR PLAYFUL DEXTERITY, UNIQUE ANATOMY AND PARTICULARLY THE TACTILE INFORMATION THAT IS GAINED TH…	6-9 CARLTON HOUSE TERRACE, LONDON SW1Y 5AG, ENGLAND	NA	ZXD878@BHAM.AC.UK	NA	NA	NA	2020-10-23	846CK	10.1098/rspb.2011.0374	NA	NA	NA	NA	NA	BBSRCBIOTECHNOLOGY AND BIOLOGICAL SCIENCES RESEARCH COUNCIL (BBSRC)	WE WOULD LIKE TO THANK THE NATIONAL HISTORY MUSEUM AT TRING, UK, FOR ACCESS TO THE SKELETON COLLECTION AND PERMISSION TO TAKE MEASUREMENTS AND PHOTOGRAPHS OF THE SKULLS. DR SUSAN CUNNINGHAM, DR ROLAND BRANDSTAETTER AND CATHERINE JONES PROVIDED VALUABLE ADVICE ON AVIAN BILL MORPHOLOGY AND HISTOLOGY. PROF. MARTIN WILD AND PROF. LESLEY ROGERS WERE CONSULTED ON AVIAN NEUROANATOMY. SIMONE WEBBER KINDL…	NA	0962-8452	PROC. R. SOC. B-BIOL. SCI.	PROCEEDINGS OF THE ROYAL SOCIETY B-BIOLOGICAL SCIENCES	ENGLISH	NA	DEC 22	NA	53	1725	GREEN PUBLISHED, BRONZE	CHAPPELL, JACKIE/0000-0001-7338-9449	NA	3687-3693	ROYAL SOC	LIFE SCIENCES \& BIOMEDICINE - OTHER TOPICS; ENVIRONMENTAL SCIENCES \& ECOLOGY; EVOLUTIONARY BIOLOGY	CHAPPELL, JACKIE/W-6772-2019	NA	33	VISION, TOUCH AND OBJECT MANIPULATION IN SENEGAL PARROTS POICEPHALUS SENEGALUS	ARTICLE	1	37	278	BIOLOGY; ECOLOGY; EVOLUTIONARY BIOLOGY
ISI000297164100032	rejected off topic illegal trade	Ada Sanchez	LEE SY, 2011, APPL ENVIRON MICROBIOL	LEE SY;LEE SS;LYOO YS;PARK HM	NA	BUDGERIGARS MELOPSITTACUS-UNDULATUS; ENCEPHALITOZOON-HELLEM; INFECTION;; BIRDS; PIGEONS; KERATOCONJUNCTIVITIS; CUNICULI; SPORES	PARK, HM (CORRESPONDING AUTHOR), KONKUK UNIV, DEPT VET INTERNAL MED, COLL VET MED, 1 HWAYANG DONG, SEOUL 143701, SOUTH KOREA.; LEE, SO-YOUNG; PARK, HEE-MYUNG, KONKUK UNIV, DEPT VET INTERNAL MED, COLL VET MED, SEOUL 143701, SOUTH KOREA.; LEE, SUNG-SEOK; LYOO, YOUNG S., KONKUK UNIV, DEPT VET IMMUNOPATHOL, COLL VET MED, SEOUL 143701, SOUTH KOREA.	WE DETECTED AND IDENTIFIED GENOTYPES OF HUMAN-PATHOGENIC MICROSPORIDIA IN FECAL SAMPLES FROM 51 ASYMPTOMATIC CAPTIVE-BRED PET PARROTS IN SOUTH KOREA. MICROSPORIDIA WERE IDENTIFIED IN 8 SAMPLES (15.7\%); 7 PARROTS TESTED POSITIVE FOR ENCEPHALITOZOON HELLEM, AND 1 PARROT TESTED POSITIVE FOR BOTH E. HELLEM AND ENCEPHALITOZOON CUNICULI. IN GENOTYPIC IDENTIFICATIONS, E. HELLEM WAS PRESENT IN GENOTYPES…	1752 N ST NW, WASHINGTON, DC 20036-2904 USA	NA	PARKHEE@KONKUK.AC.KR	NA	NA	NA	2020-10-23	849ZL	10.1128/AEM.05343-11	NA	NA	NA	NA	NA	NA	NA	NA	0099-2240	APPL. ENVIRON. MICROBIOL.	APPLIED AND ENVIRONMENTAL MICROBIOLOGY	ENGLISH	NA	DEC	NA	21	23	BRONZE, GREEN PUBLISHED	NA	NA	8442-8444	AMER SOC MICROBIOLOGY	BIOTECHNOLOGY \& APPLIED MICROBIOLOGY; MICROBIOLOGY	NA	NA	10	DNA DETECTION AND GENOTYPIC IDENTIFICATION OF POTENTIALLY HUMAN-PATHOGENIC MICROSPORIDIA FROM ASYMPTOMATIC PET PARROTS IN SOUTH KOREA AS A RISK FACTOR FOR ZOONOTIC EMERGENCE	ARTICLE	0	6	77	BIOTECHNOLOGY \& APPLIED MICROBIOLOGY; MICROBIOLOGY
ISI000297410800005	rejected off topic (not related to taxon)	JRFP	VEENSTRA AA, 2011, AUST J ENTOMOL	VEENSTRA AA;MICHALCZYK A;KOLESIK P	ASPHONDYLIA; BOTRYSPHAERIA; INSECT TAXONOMY; PLATYGASTRIDAE;; SCLEROSTEGIA; TECTICORNIA	ASPHONDYLIA; HYMENOPTERA; BEHAVIOR	VEENSTRA, AA (CORRESPONDING AUTHOR), DEAKIN UNIV, SCH LIFE \& ENVIRONM SCI, CTR CELL \& MOL BIOL, MELBOURNE CAMPUS,221 BURWOOD HIGHWAY, BURWOOD, VIC 3125, AUSTRALIA.; VEENSTRA, ANNEKE A.; MICHALCZYK, AGNES, DEAKIN UNIV, SCH LIFE \& ENVIRONM SCI, CTR CELL \& MOL BIOL, BURWOOD, VIC 3125, AUSTRALIA.; KOLESIK, PETER, BIONOMICS LTD, THEBARTON, SA 5031, AUSTRALIA.	TWO NEW SPECIES OF GALL MIDGE ASSOCIATED WITH TWO LEAF GALLS ON THE BRANCHED, PERENNIAL SHRUB TECTICORNIA ARBUSCULA ARE DESCRIBED FROM SALTMARSHES IN SOUTH-EASTERN AUSTRALIA. THE INFESTATIONS CAUSED BY THE NEW SPECIES HINDER THE GROWTH OF T. ARBUSCULA WHICH CAN IMPACT ON THE CRITICALLY ENDANGERED ORANGE BELLIED PARROT (NEOPHEMA CHRYSOGASTER): T. ARBUSCULA PROVIDES PERCHING AND ROOSTING SITES AND …	111 RIVER ST, HOBOKEN 07030-5774, NJ USA	NA	ANNEKE.VEENSTRA@DEAKIN.EDU.AU	NA	NA	NA	2020-10-23	853FE	10.1111/j.1440-6055.2011.00833.x	NA	NA	1440-6055	NA	NA	DEAKIN UNIVERSITY, FACULTY OF SCIENCE AND TECHNOLOGY	THIS WORK WAS SUPPORTED BY A DEAKIN UNIVERSITY, FACULTY OF SCIENCE AND TECHNOLOGY START-UP GRANT TO A.A.V.	NA	1326-6756	AUST. J. ENTOMOL.	AUSTRALIAN JOURNAL OF ENTOMOLOGY	ENGLISH	NA	NOV	NA	31	4	NA	VEENSTRA, ANNEKE A./0000-0003-2857-3583 MICHALCZYK, AGNES/0000-0001-5716-0783	NA	393-404	WILEY	ENTOMOLOGY	VEENSTRA, ANNEKE A./T-5883-2017	NA	3	TAXONOMY OF TWO NEW SPECIES OF GALL MIDGE (DIPTERA: CECIDOMYIIDAE) INFESTING TECTICORNIA ARBUSCULA (SALICORNIOIDEAE: CHENOPODIACEAE) IN AUSTRALIAN SALTMARSHES	ARTICLE	0	9	50	ENTOMOLOGY
ISI000299703400009	included in review	JRFP	CONSUELO MARIN-TOGO M, 2012, BIODIVERS CONSERV	CONSUELO MARIN-TOGO M;MONTERRUBIO-RICO TC;RENTON K;RUBIO-ROCHA Y;MACIAS-CABALLERO JM;CANCINO-MURILLO R	FIELD SURVEYS; DISTRIBUTION REDUCTION; ECOLOGICAL NICHE MODELS; HABITAT; AVAILABILITY; PARROTS; PRESENCE-ABSENCE RECORDS; PROTECTED AREAS;; SPECIES EXTIRPATION	MODELING ECOLOGICAL NICHES; PARROT AMAZONA-ORATRIX; GEOGRAPHIC; DISTRIBUTIONS; GARP; BIRDS	MARIN-TOGO, MC (CORRESPONDING AUTHOR), MICH, FAC BIOL, EDIFICIO R PLANTA BAJA,CIUDAD UNIV, MORELIA 58040, MICHOACAN, MEXICO.; CONSUELO MARIN-TOGO, MARIA, MICH, FAC BIOL, MORELIA 58040, MICHOACAN, MEXICO.; CONSUELO MARIN-TOGO, MARIA; MONTERRUBIO-RICO, TIBERIO C.; CANCINO-MURILLO, RAMON, UNIV MICHOACANA, LAB ECOL VERTEBRADOS TERRESTRES PRIORITARIOS, FAC BIOL, MORELIA 58194, MICHOACAN, MEXICO.; RENT…	ECOLOGICAL NICHE MODELS PROVIDE USEFUL PREDICTIONS OF SPECIES DISTRIBUTIONS, BUT MAY FAIL TO DETECT REDUCTIONS IN DISTRIBUTION DUE TO FACTORS OTHER THAN HABITAT LOSS, SUCH AS HUNTING OR TRADE. FROM 2001 TO 2009, WE CONDUCTED FIELD-SURVEYS ALONG THE MEXICAN PACIFIC COAST TO OBTAIN PRESENCE-ABSENCE DATA FOR NINE PSITTACIDAE SPECIES. WE APPLIED GENETIC ALGORITHM FOR RULE SET PREDICTION (GARP) ECOLOG…	VAN GODEWIJCKSTRAAT 30, 3311 GZ DORDRECHT, NETHERLANDS	NA	MAR\_MARTOG@YAHOO.COM.MX	NA	NA	NA	2020-10-23	884KI	10.1007/s10531-011-0193-y	NA	NA	1572-9710	NA	NA	CONACYTCONSEJO NACIONAL DE CIENCIA Y TECNOLOGIA (CONACYT) [229130, 135702-V]; COORDINACION DE INVESTIGACION CIENTIFICA OF THE UNIVERSIDAD MICHOACANA DE SAN NICOLAS DE HIDALGO [8.6]; FONDO SECTORIAL DE INVESTIGACION AMBIENTAL SEMARNAT-CONACYTCONSEJO NACIONAL DE CIENCIA Y TECNOLOGIA (CONACYT) [2002-C01-00021]; PROGRAMA DE DOCTORADO INSTITUCIONAL EN CIENCIAS BIOLOGICAS; FACULTAD DE BIOLOGIA AT UNIVE…	WE ARE GRATEFUL FOR FIELD ASSISTANCE PROVIDED BY ALEJANDRO SALINAS-MELGOZA, EDNA LOPEZ-CORDOVA, BENEIZA FABIAN-TURJA, BERENICE SANTIAGO-VALENCIA, LORENA TELLEZ-GARCIA, MIGUEL DE LABRA HERNANDEZ, ISMAEL CARRILLO ACEVEDO, MARGARITO ALVAREZ-JARA, TANIA SANCHEZ-MARTINEZ AND JUAN FELIPE CHARRE-MEDELLIN. WE THANK ADOLFO NAVARRO-SIGUENZA AND THE ATLAS OF BIRDS OF MEXICO FOR HISTORICAL DATA. WE THANK CON…	NA	0960-3115	BIODIVERS. CONSERV.	BIODIVERSITY AND CONSERVATION	ENGLISH	NA	FEB	NA	65	2	NA	NA	NA	451-473	SPRINGER	BIODIVERSITY \& CONSERVATION; ENVIRONMENTAL SCIENCES \& ECOLOGY	NA	NA	23	REDUCED CURRENT DISTRIBUTION OF PSITTACIDAE ON THE MEXICAN PACIFIC COAST: POTENTIAL IMPACTS OF HABITAT LOSS AND CAPTURE FOR TRADE	ARTICLE	3	53	21	BIODIVERSITY CONSERVATION; ECOLOGY; ENVIRONMENTAL SCIENCES
ISI000300050500006	included in review	Ada Sanchez	PIRES S, 2012, J RES CRIME DELINQ	PIRES S;CLARKE RV	PREVENTION; CRIME; RATIONAL CHOICE THEORY; CRIMINOLOGICAL THEORY;; ROUTINE ACTIVITY THEORY; WILDLIFE CRIMES; GIS	SITUATIONAL CRIME-PREVENTION; CONSERVATION; PROTECTION; TRADE; NEST	CLARKE, RV (CORRESPONDING AUTHOR), RUTGERS STATE UNIV, SCH CRIMINAL JUSTICE, 123 WASHINGTON ST, NEWARK, NJ 07102 USA.; PIRES, STEPHEN; CLARKE, RONALD V., RUTGERS STATE UNIV, SCH CRIMINAL JUSTICE, NEWARK, NJ 07102 USA.	POACHING SIGNIFICANTLY CONTRIBUTES TO THE ENDANGERMENT OF PROTECTED WILDLIFE BUT HAS RARELY BEEN STUDIED BY CRIMINOLOGISTS. THIS STUDY EXAMINES WHETHER CRAVED, A GENERAL MODEL OF THEFT CHOICES DRAWN FROM ROUTINE ACTIVITY AND RATIONAL CHOICE THEORY, CAN HELP TO EXPLAIN PARROT POACHING. IT CORRELATES ESTIMATES OF THE NUMBERS POACHED FOR THE 22 SPECIES OF MEXICAN PARROTS WITH MEASURES OF CRAVED COMP…	2455 TELLER RD, THOUSAND OAKS, CA 91320 USA	NA	RCLARKE@ANDROMEDA.RUTGERS.EDU	NA	NA	NA	2020-10-23	889CG	10.1177/0022427810397950	NA	NA	1552-731X	NA	NA	NA	NA	NA	0022-4278	J. RES. CRIME DELINQ.	JOURNAL OF RESEARCH IN CRIME AND DELINQUENCY	ENGLISH	NA	FEB	NA	40	1	NA	MONTAZERIAN, MAZIAR/0000-0002-1409-9182 ZANOTTO, EDGAR DUTRA/0000-0003-4931-4505 PIRES, STEPHEN/0000-0002-8525-0185	NA	122-146	SAGE PUBLICATIONS INC	CRIMINOLOGY \& PENOLOGY	MONTAZERIAN, MAZIAR/G-2041-2015 ZANOTTO, EDGAR DUTRA/A-7992-2011	NA	103	ARE PARROTS CRAVED? AN ANALYSIS OF PARROT POACHING IN MEXICO	ARTICLE	0	31	49	CRIMINOLOGY \& PENOLOGY
ISI000300392700024	included in review	Ada Sanchez	COGHLAN ML, 2012, FORENSIC SCI INT -GENET	COGHLAN ML;WHITE NE;PARKINSON L;HAILE J;SPENCER PBS;BUNCE M	SPECIES IDENTIFICATION; WILDLIFE FORENSICS; MITOCHONDRIAL DNA; ILLEGAL; BIRD TRADE; PARROTS; COCKATOOS	INTERNATIONAL-TRADE; WILDLIFE-TRADE; VALIDATION; NUMBER	BUNCE, M (CORRESPONDING AUTHOR), AUSTRALIAN WILDLIFE FORENS SERV, SOUTH ST, MURDOCH, WA 6150, AUSTRALIA.; COGHLAN, MEGAN L.; WHITE, NICOLE E.; PARKINSON, LIZA; HAILE, JAMES; BUNCE, MICHAEL, AUSTRALIAN WILDLIFE FORENS SERV, MURDOCH, WA 6150, AUSTRALIA.; COGHLAN, MEGAN L.; WHITE, NICOLE E.; PARKINSON, LIZA; HAILE, JAMES; BUNCE, MICHAEL, MURDOCH UNIV, SCH BIOL SCI \& BIOTECHNOL, ANCIENT DNA LAB, MUR…	PSITTACIFORMES (PARROTS AND COCKATOOS) ARE CHARISMATIC BIRDS, THEIR PLUMAGE AND CAPACITY FOR LEARNING MAKE THEM HIGHLY SOUGHT AFTER PETS. THE ILLEGAL TRADE IN PARROTS AND COCKATOOS POSES A SERIOUS THREAT TO THE VIABILITY OF NATIVE POPULATIONS; IN ADDITION, SPECIES TRANSPORTED TO NON-ENDEMIC AREAS MAY POTENTIALLY VECTOR DISEASE AND GENETICALLY `POLLUTE' LOCAL NATIVE AVIFAUNA. TO REDUCE THE LOGISTI…	ELSEVIER HOUSE, BROOKVALE PLAZA, EAST PARK SHANNON, CO, CLARE, 00000, IRELAND	NA	M.BUNCE@MURDOCH.EDU.AU	NA	NA	NA	2020-10-23	893YC	10.1016/j.fsigen.2011.06.006	NA	NA	1878-0326	NA	NA	ARCAUSTRALIAN RESEARCH COUNCIL [FT0991741]; ROBERT HAMMOND RESEARCH STUDENTSHIP; ANIMAL RESEARCH INSTITUTE AT MURDOCH UNIVERSITY	WE GRATEFULLY ACKNOWLEDGE THE SUPPORT OF THE AUSTRALIAN CUSTOMS AND BORDER PROTECTION SERVICE (ACBPS), THE DEPARTMENT OF ENVIRONMENT, WATER, HERITAGE AND THE ARTS (DEWHA) AND THE WEST AUSTRALIAN DEPARTMENT OF ENVIRONMENT AND CONSERVATION (DEC) IN SUPPLYING SAMPLES FOR THIS STUDY. WE ARE GRATEFUL FOR FUNDING FROM THE ARC FUTURE FELLOWSHIP SCHEME (FT0991741 TO MB), THE ROBERT HAMMOND RESEARCH STUDE…	NA	1872-4973	FORENSIC SCI. INT.-GENET.	FORENSIC SCIENCE INTERNATIONAL-GENETICS	ENGLISH	NA	MAR	NA	42	2	GREEN PUBLISHED	BUTLER, PAUL G/0000-0002-9924-0316 SPENCER, PETER/0000-0002-4938-2615 WHITE, NICOLE/0000-0002-0068-6693	NA	268-273	ELSEVIER IRELAND LTD	GENETICS \& HEREDITY; LEGAL MEDICINE	BUTLER, PAUL G/D-1905-2012	NA	20	EGG FORENSICS: AN APPRAISAL OF DNA SEQUENCING TO ASSIST IN SPECIES IDENTIFICATION OF ILLEGALLY SMUGGLED EGGS	ARTICLE	0	53	6	GENETICS \& HEREDITY; MEDICINE, LEGAL
ISI000301542000009	rejected off topic parrots	JRFP	BELL AR, 2012, APPL ECON	BELL AR;BROOKS C;MATTHEWS D;SUTCLIFFE C	STOCK RETURNS; EFFICIENT MARKETS HYPOTHESIS; FOOTBALL RESULTS; SOCCER; CLUBS	BETTING MARKET; STOCK-MARKET; UK FOOTBALL; ODDS; EFFICIENCY;; PERFORMANCE; INFORMATION; POPULATION; SENTIMENT; MORTALITY	BROOKS, C (CORRESPONDING AUTHOR), UNIV READING, ICMA CTR, POB 242, READING RG6 6BA, BERKS, ENGLAND.; BELL, ADRIAN R.; BROOKS, CHRIS; MATTHEWS, DAVID; SUTCLIFFE, CHARLES, UNIV READING, ICMA CTR, READING RG6 6BA, BERKS, ENGLAND.	THIS ARTICLE CONSIDERS THE IMPACT OF MATCH RESULTS ON THE STOCK RETURNS OF ENGLISH FOOTBALL CLUBS. WE PROPOSE THAT THE MAGNITUDE OF THE RESPONSE TO A GIVEN RESULT DEPENDS ON THE IMPORTANCE OF THE GAME, WHICH IS MEASURED IN TWO WAYS. FIRST, WE CONSIDER THE EXTENT TO WHICH THE CLUBS ARE CLOSE RIVALS VYING FOR SIMILAR LEAGUE POSITIONS, AS WINNING SUCH GAMES IS PARTICULARLY SIGNIFICANT. SECOND, WE AR…	4 PARK SQUARE, MILTON PARK, ABINGDON OX14 4RN, OXFORDSHIRE, ENGLAND	NA	C.BROOKS@ICMACENTRE.RDG.AC.UK	NA	NA	NA	2020-10-23	909DI	10.1080/00036846.2011.577017	NA	NA	NA	NA	NA	NA	NA	NA	0003-6846	APPL. ECON.	APPLIED ECONOMICS	ENGLISH	NA	NA	NA	56	26	GREEN ACCEPTED	BROOKS, CHRIS/0000-0002-2668-1153 BELL, ADRIAN/0000-0003-4531-0072 SUTCLIFFE, CHARLES/0000-0003-0187-487X	NA	3435-3452	ROUTLEDGE JOURNALS, TAYLOR \& FRANCIS LTD	BUSINESS \& ECONOMICS	BROOKS, CHRIS/C-9033-2016	NA	19	OVER THE MOON OR SICK AS A PARROT? THE EFFECTS OF FOOTBALL RESULTS ON A CLUB'S SHARE PRICE	ARTICLE	2	17	44	ECONOMICS
ISI000302117300008	rejected off topic illegal trade	Ada Sanchez	D'ALBA L, 2012, J EXP BIOL	D'ALBA L;KIEFFER L;SHAWKEY MD	STRUCTURAL COLOR; PSITTACOFULVIN	COHERENT-LIGHT SCATTERING; FOURIER-ANALYSIS; PLUMAGE COLOR; BARBS;; KERATIN; YELLOW	D'ALBA, L (CORRESPONDING AUTHOR), UNIV AKRON, DEPT BIOL, AKRON, OH 44325 USA.; D'ALBA, LILIANA, UNIV AKRON, DEPT BIOL, AKRON, OH 44325 USA.; UNIV AKRON, INTEGRATED BIOSCI PROGRAM, AKRON, OH 44325 USA.	UNDERSTANDING THE MECHANISTIC BASES OF NATURAL COLOR DIVERSITY CAN PROVIDE INSIGHT INTO ITS EVOLUTION AND INSPIRATION FOR BIOMIMETIC OPTICAL STRUCTURES. METAZOANS CAN BE COLORED BY ABSORPTION OF LIGHT FROM PIGMENTS OR BY SCATTERING OF LIGHT FROM BIOPHOTONIC NANOSTRUCTURES, AND THESE MECHANISMS HAVE LARGELY BEEN TREATED AS DISTINCT. HOWEVER, THE INTERACTIONS BETWEEN THEM HAVE RARELY BEEN EXAMINED.…	BIDDER BUILDING CAMBRIDGE COMMERCIAL PARK COWLEY RD, CAMBRIDGE CB4 4DL, CAMBS, ENGLAND	NA	LILIANA@UAKRON.EDU	NA	NA	NA	2020-10-23	916QC	10.1242/jeb.064907	NA	NA	NA	NA	NA	UNIVERSITY OF AKRON; AIR FORCE OFFICE OF SCIENTIFIC RESEARCH (AFOSR)UNITED STATES DEPARTMENT OF DEFENSEAIR FORCE OFFICE OF SCIENTIFIC RESEARCH (AFOSR) [FA9550-09-1-0159]	THIS WORK WAS SUPPORTED BY UNIVERSITY OF AKRON START-UP FUNDS AND AIR FORCE OFFICE OF SCIENTIFIC RESEARCH (AFOSR) GRANT FA9550-09-1-0159 (BOTH TO M.D.S.).	NA	0022-0949	J. EXP. BIOL.	JOURNAL OF EXPERIMENTAL BIOLOGY	ENGLISH	NA	APR	NA	29	8	BRONZE	D'ALBA, LILIANA/0000-0002-2478-3455 SHAWKEY, MATTHEW/0000-0002-5131-8209	NA	1272-1277	COMPANY OF BIOLOGISTS LTD	LIFE SCIENCES \& BIOMEDICINE - OTHER TOPICS	D'ALBA, LILIANA/L-2322-2018	NA	38	RELATIVE CONTRIBUTIONS OF PIGMENTS AND BIOPHOTONIC NANOSTRUCTURES TO NATURAL COLOR PRODUCTION: A CASE STUDY IN BUDGERIGAR (MELOPSITTACUS UNDULATUS) FEATHERS	ARTICLE	0	33	215	BIOLOGY
ISI000303015600001	rejected off topic illegal trade	Ada Sanchez	PAPINI R, 2012, SCI WORLD J	PAPINI R;GIRIVETTO M;MARANGI F;GIANGASPERO A	NA	ZOOLOGICAL-GARDEN; GIARDIA; CRYPTOSPORIDIUM; PARASITISM; DISSEMINATION;; ALMUNECAR; PATHOGENS; HELMINTHS; ANIMALS; OOCYSTS	PAPINI, R (CORRESPONDING AUTHOR), UNIV PISA, DIPARTIMENTO PATOL ANIM PROFILASSI \& IGIENE ALIME, VIALE PIAGGE 2, I-56124 PISA, ITALY.; PAPINI, ROBERTO; GIRIVETTO, MARTINE; MANCIANTI, FRANCESCA, UNIV PISA, DIPARTIMENTO PATOL ANIM PROFILASSI \& IGIENE ALIME, I-56124 PISA, ITALY.; MARANGI, MARIANNA; GIANGASPERO, ANNUNZIATA, UNIV FOGGIA, DIPARTIMENTO PRIME, I-71100 FOGGIA, ITALY.	FAECAL SAMPLES WERE INDIVIDUALLY COLLECTED FROM PET (N = 63) AND ZOO (N = 83) BIRDS REPRESENTING 14 ORDERS AND 63 SPECIES. ALL THE SAMPLES WERE EXAMINED BY FAECAL FLOTATION TECHNIQUE. IN A SUBGROUP OF SAMPLES (N = 75), MOLECULAR ASSAYS WERE ALSO USED TO DETECT CRYPTOSPORIDIUM OOCYSTS AND GIARDIA DUODENALIS CYSTS. OVERALL, 35.6\% OF THE BIRDS HARBOURED PARASITES (42.2\% OF ZOO BIRDS AND 27\% OF PE…	ADAM HOUSE, 3RD FLR, 1 FITZROY SQ, LONDON, W1T 5HF, ENGLAND	253127	RPAPINI@VET.UNIPI.IT	NA	NA	NA	2020-10-23	928VL	10.1100/2012/253127	NA	NA	NA	NA	NA	NA	NA	NA	1537-744X	SCI. WORLD J.	SCIENTIFIC WORLD JOURNAL	ENGLISH	NA	NA	NA	48	NA	DOAJ GOLD, GREEN PUBLISHED	NA	NA	NA	HINDAWI LTD	SCIENCE \& TECHNOLOGY - OTHER TOPICS	MANCIANTI, FRANCESCA/W-7841-2019 R, PAPINI/H-3191-2019	NA	19	ENDOPARASITE INFECTIONS IN PET AND ZOO BIRDS IN ITALY	ARTICLE	1	13	NA	MULTIDISCIPLINARY SCIENCES
ISI000304583500005	rejected off topic illegal trade	Ada Sanchez	HAHN A, 2011, TIERARZTL PRAX AUSG KLEINTIERE HEIMTIERE	HAHN A;REITEMEIER S;GOTTSCHALK J;HAENSE V;STEINBACH-SOBIRAJ K;KRAUTWALD-JUNGHANNS ME;EINSPANIER A	PSITTACINES; TESTOSTERONE; CORTICOSTERONE; REPRODUCTION; STRESS	FEMALE RING DOVES; COCKATIEL NYMPHICUS-HOLLANDICUS; CHALLENGE; HYPOTHESIS; PSITTACULA-KRAMERI; GALLUS-DOMESTICUS; OVARIAN ACTIVITY;; TESTOSTERONE; HORMONE; ANDROGEN; PLASMA	HAHN, A (CORRESPONDING AUTHOR), UNIV LEIPZIG, VET PHYSIOL CHEM INST, TIERKLINIKEN 1, D-04103 LEIPZIG, GERMANY.; HAHN, A.; REITEMEIER, S.; GOTTSCHALK, J.; EINSPANIER, A., UNIV LEIPZIG, VET PHYSIOL CHEM INST, D-04103 LEIPZIG, GERMANY.; HAENSE, M.; SCHMIDT, V.; STEINBACH-SOBIRAJ, K.; KRAUTWALD-JUNGHANNS, M. -E., UNIV LEIPZIG, KLIN VOGEL \& REPTILIEN, D-04103 LEIPZIG, GERMANY.	OBJECTIVE: EVALUATING METHODS OF HORMONE MEASUREMENT IN DIFFERENT SPECIMENS OF MALE PARROTS IN ORDER TO ASSESS THEIR REPRODUCTIVE STATUS AND STRESS AXIS. MATERIAL AND METHODS: COCKATIELS AND ROSE-RINGED PARAKEETS WERE CHOSEN AS PSITTACIFORME REPRESENTATIVES AND THEIR ENDOCRINE PROFILES WERE EXAMINED. IN VARIOUS PRE-EXPERIMENTS, SUITABLE TECHNIQUES FOR THE DETERMINATION OF TESTOSTERONE IN PLASMA, …	HOLDERLINSTRASSE 3, D-70174 STUTTGART, GERMANY	NA	HAHN@VETMED.UNI-LEIPZIG.DE	NA	NA	NA	2020-10-23	949NS	NA	NA	NA	NA	NA	NA	NA	NA	NA	1434-1239	TIERARZTL. PRAX. AUSG. KLEINTIERE HEIMTIERE	TIERAERZTLICHE PRAXIS AUSGABE KLEINTIERE HEIMTIERE	GERMAN	NA	NA	NA	47	4	NA	SCHMIDT, VOLKER/0000-0002-6001-9542	NA	249-257	SCHATTAUER GMBH-VERLAG MEDIZIN NATURWISSENSCHAFTEN	VETERINARY SCIENCES	SCHMIDT, VOLKER/I-7708-2019	NA	3	ASSESSMENT OF THE MALE REPRODUCTIVE STATUS IN PSITTACIFORMES BY ENDOCRINE ANALYSIS	ARTICLE	0	12	39	VETERINARY SCIENCES
ISI000305775000018	rejected off topic illegal trade	Ada Sanchez	KRIZEK I, 2012, ACTA VET -BEOGR	KRIZEK I;DANIJELA H;GOTTSTEIN Z;STEINER G;ZELJKA E;ESTELLA PR	CHLAMYDOPHILA PSITTACI; ELISA; EPIDEMIOLOGY; PCR; PET BIRDS	PIGEONS	DANIJELA, H (CORRESPONDING AUTHOR), UNIV ZAGREB, FAC VET MED, DEPT POULTRY DIS CLIN, HEINZELOVA 55, ZAGREB 10000, CROATIA.; DANIJELA, HORVATEK, UNIV ZAGREB, FAC VET MED, DEPT POULTRY DIS CLIN, ZAGREB 10000, CROATIA.; KRIZEK, I, PHOENIX FARMACIJA DD, OSIJEK, CROATIA.; STEINER, Z.; DALIDA, GALOVIC, JJ STROSSMAYER UNIV OSIJEK, FAC AGR, OSIJEK, CROATIA.; ZELJKA, ERVACINOVIC, ARGUS DOO, SLAVONSKI BROD…	A TOTAL OF 411 SAMPLES FROM BIRDS OF DIFFERENT SPECIES ORIGINATING FROM ALL COUNTIES OF THE REPUBLIC OF CROATIA HAVE BEEN TESTED FOR THE PRESENCE OF CHLAMYDOPHILA PSITTACI. THE SAMPLING WAS CONDUCTED IN PET STORES, BREEDERS AVIARIES, IN A SPECIALIZED BIRD CLINIC AND IN ZOOS. THE TESTING INCLUDED 177 PARROTS, 169 PIGEONS, 58 CANARIES AND 7 FINCHES. FOR THE DETECTION OF SPECIFIC C. PSITTACI ANTIGEN…	BULEVAR OSLOBODENJA 18, 11000 BELGRADE, SERBIA	NA	HORVATEK@VEF.HR	NA	NA	NA	2020-10-23	965NR	10.2298/AVB1203325K	NA	NA	NA	NA	NA	MINISTRY OF SCIENCE AND TECHNOLOGY OF THE REPUBLIC OF CROATIA [053-053-1863-1857]	THE INVESTIGATION WAS PARTLY SUPPORTED BY THE MINISTRY OF SCIENCE AND TECHNOLOGY OF THE REPUBLIC OF CROATIA, GRANTS NO. 053-053-1863-1857.	NA	0567-8315	ACTA VET.-BEOGR.	ACTA VETERINARIA-BEOGRAD	ENGLISH	NA	NA	NA	16	23	NA	NA	NA	325-331	VETERINARY FACULTY, UNIV BEOGRADU	VETERINARY SCIENCES	NA	NA	1	EPIDEMIOLOGICAL STUDY OF CHLAMYDOPHILA PSITTACI IN PET BIRDS IN CROATIA	ARTICLE	0	12	62	VETERINARY SCIENCES
ISI000305867400002	included in review	Ada Sanchez	FRUTOS MC, 2012, REV ARGENT MICROBIOL	FRUTOS MC;VENEZUELA F;KIGUEN X;RE V;CUFFINI C	CHLAMYDOPHILA PECORUM; BIRDS IN CAPTIVITY; OMPA GENE; SEQUENCE ANALYSIS	NA	FRUTOS, MC (CORRESPONDING AUTHOR), UNIV NACL CORDOBA, FAC CIENCIAS MED, INST VIROL DR JM VANELLA, ENFERMERA GORDILLO GOMEZ S-N CIUDAD UNIV, RA-5016 CORDOBA, ARGENTINA.; FRUTOS, MARIA C.; VENEZUELA, FERNANDO; KIGUEN, XIMENA; RE, VIVIANA; CUFFINI, CECILIA, UNIV NACL CORDOBA, FAC CIENCIAS MED, INST VIROL DR JM VANELLA, RA-5016 CORDOBA, ARGENTINA.	BACTERIA BELONGING TO THE FAMILY CHLAMYDIACEAE CAUSE A BROAD SPECTRUM OF DISEASES IN A WIDE RANGE OF HOSTS, INCLUDING HUMANS, OTHER MAMMALS AND BIRDS. HOWEVER, VERY LITTLE IS KNOWN ABOUT CHLAMYDIAL INFECTIONS IN BIRDS IN OUR REGION. IN THE PRESENT STUDY, WE EXAMINED 28 CLINICALLY NORMAL BIRDS IN ILLEGAL CAPTIVITY THAT WERE CONFISCATED IN THE PROVINCE OF CORDOBA, ARGENTINA. THE OBJECTIVE WAS TO DE…	BULNES 44 PB B, BUENOS AIRES, 00000, ARGENTINA	NA	MARIACELIAFRUTOS@GMAIL.COM	NA	NA	NA	2020-10-23	966WF	NA	NA	NA	1851-7617	NA	NA	[SECYT-UNC 05/H181]; [MINCYT-CBA 1427/09]; [MINCYT-PID 113/11]	THIS WORK WAS PARTIALLY SUPPORTED BY SECYT-UNC 05/H181, MINCYT-CBA 1427/09, MINCYT-PID 113/11. THIS SHORT COMMUNICATION HAS BEEN PREPARED IN THE CONTEXT OF THE COLLABORATION PROMOTED BY THE PROVINCIAL SECRETARIAT FOR ENVIRONMENTAL PROTECTION AND SUSTAINABLE DEVELOPMENT, CORDOBA, ARGENTINA.	NA	0325-7541	REV. ARGENT. MICROBIOL.	REVISTA ARGENTINA DE MICROBIOLOGIA	ENGLISH	NA	APR-JUN	NA	8	2	NA	VENEZUELA, RAUL FERNANDO/0000-0002-4325-8998	NA	65-68	ASOCIACION ARGENTINA MICROBIOLOGIA	MICROBIOLOGY	FRUTOS, CELIA/AAU-9948-2020	NA	3	DETECTION OF THE OMPA GENE OF CHLAMYDOPHILA PECORUM IN CAPTIVE BIRDS IN ARGENTINA	ARTICLE	0	1	44	MICROBIOLOGY
ISI000306358200034	included in review	Ada Sanchez	WHITE NE, 2012, FORENSIC SCI INT -GENET	WHITE NE;DAWSON R;COGHLAN ML;TRIDICO SR;MAWSON PR;HAILE J;BUNCE M	WILDLIFE FORENSICS; POACHING; POPULATION DATABASE; FEATHERS; EGGSHELL	SPECIES IDENTIFICATION; FUNEREUS-LATIROSTRIS; CARNABYS COCKATOO; NESTING; SUCCESS; DNA; POPULATIONS; RELATEDNESS; IDENTITY; UPDATE; ORIGIN	WHITE, NE (CORRESPONDING AUTHOR), MURDOCH UNIV, SCH BIOL SCI \& BIOTECHNOL, AUSTRALIAN WILDLIFE FORENS SERV, PERTH, WA 6150, AUSTRALIA.; WHITE, NICOLE E.; COGHLAN, MEGAN L.; TRIDICO, SILVANA R.; HAILE, JAMES; BUNCE, MICHAEL, MURDOCH UNIV, SCH BIOL SCI \& BIOTECHNOL, AUSTRALIAN WILDLIFE FORENS SERV, PERTH, WA 6150, AUSTRALIA.; WHITE, NICOLE E.; COGHLAN, MEGAN L.; TRIDICO, SILVANA R.; HAILE, JAMES;…	PARROTS AND COCKATOOS ARE HIGHLY PRIZED AVIARY BIRDS AND THE DEMANDS FOR SUCH SPECIES HAS FUELLED THEIR ILLEGAL TRADE AND HARVEST FROM THE WILD. HERE WE REPORT ON THREE FORENSIC CASE STUDIES INVOLVING BLACK-COCKATOOS (CALYPTORHYNCHUS SPP.) ENDEMIC TO AUSTRALIA. THESE CASES INVOLVE SUSPECTED POACHING AND ILLEGAL KILLING OF ENDANGERED RED- AND WHITE-TAILED BLACK-COCKATOOS. THROUGH THE PRIOR DEVELOP…	ELSEVIER HOUSE, BROOKVALE PLAZA, EAST PARK SHANNON, CO, CLARE, 00000, IRELAND	NA	N.WHITE@MURDOCH.EDU.AU M.BUNCE@MURDOCH.EDU.AU	NA	NA	NA	2020-10-23	973KE	10.1016/j.fsigen.2011.10.003	NA	NA	1878-0326	NA	NA	ROBERT HAMMOND RESEARCH STUDENTSHIP; MURDOCH UNIVERSITY; DEPARTMENT OF ENVIRONMENT AND CONSERVATION; DEPARTMENT OF ENVIRONMENT, WATER, HERITAGE AND THE ARTS; BIRDS AUSTRALIA; ARCAUSTRALIAN RESEARCH COUNCIL [FT0991741]	THIS WORK WAS SUPPORTED BY FUNDING FROM THE ROBERT HAMMOND RESEARCH STUDENTSHIP (TO N.E. WHITE), MURDOCH UNIVERSITY, DEPARTMENT OF ENVIRONMENT AND CONSERVATION, DEPARTMENT OF ENVIRONMENT, WATER, HERITAGE AND THE ARTS, BIRDS AUSTRALIA, AND ARC FUTURE FELLOWSHIP FT0991741 (M. B.). THE AUTHORS WISH TO THANK P. B. S. SPENCER FOR USE OF LABORATORY FACILITIES, IVEC INFORMATICS FACILITY, CENTRE FOR COMP…	NA	1872-4973	FORENSIC SCI. INT.-GENET.	FORENSIC SCIENCE INTERNATIONAL-GENETICS	ENGLISH	NA	SEP	NA	43	5	NA	MAWSON, PETER/0000-0001-6729-2966 BUNCE, MICHAEL/0000-0002-0302-4206 WHITE, NICOLE/0000-0002-0068-6693	NA	664-670	ELSEVIER IRELAND LTD	GENETICS \& HEREDITY; LEGAL MEDICINE	MAWSON, PETER/AAA-8556-2019	NA	15	APPLICATION OF STR MARKERS IN WILDLIFE FORENSIC CASEWORK INVOLVING AUSTRALIAN BLACK-COCKATOOS (CALYPTORHYNCHUS SPP.)	ARTICLE	0	62	6	GENETICS \& HEREDITY; MEDICINE, LEGAL
ISI000306586800062	included in review	Ada Sanchez	RINGLER E, 2012, CONSERV GENET RESOUR	RINGLER E	AMAZON PARROT; AMAZONA; MICROSATELLITE MARKERS; RELATEDNESS; ILLEGAL; TRADE; CAPTIVE BREEDING	ST-VINCENT PARROT; CONSERVATION GENETICS; NEOTROPICAL PARROTS;; AMAZONA-GUILDINGII; LOCI; PSITTACIFORMES; AMPLIFICATION; SUCCESS	RINGLER, E (CORRESPONDING AUTHOR), UNIV VIENNA, DEPT EVOLUTIONARY BIOL, ALTHANSTR 14, A-1090 VIENNA, AUSTRIA.; UNIV VIENNA, DEPT EVOLUTIONARY BIOL, A-1090 VIENNA, AUSTRIA.	BREEDING PROGRAMS THAT ARE AIMED FOR EX SITU CONSERVATION OF ENDANGERED SPECIES SHOULD ASSURE MINIMAL INBREEDING AMONG INDIVIDUALS IN ORDER TO MAINTAIN THE GENETIC VARIATION WITHIN CAPTIVE POPULATIONS. IN THE ABSENCE OF PEDIGREE INFORMATION, E.G. IN CASES OF CONFISCATED INDIVIDUALS, RAPID, EASILY APPLICABLE AND COST-EFFICIENT METHODS ARE NEEDED FOR THE ESTABLISHMENT OF OPTIMAL BREEDING PROTOCOLS.…	VAN GODEWIJCKSTRAAT 30, 3311 GZ DORDRECHT, NETHERLANDS	NA	EVA.RINGLER@UNIVIE.AC.AT	NA	NA	NA	2020-10-23	976LS	10.1007/s12686-012-9642-5	NA	NA	NA	NA	NA	VIENNA ZOO `TIERGARTEN SCHONBRUNN'	THIS STUDY WAS FUNDED BY THE VIENNA ZOO `TIERGARTEN SCHONBRUNN'. THOMAS VORACEK PROVIDED THE BLOOD SAMPLES OF ALL INDIVIDUALS. SAMPLING AND ALL MOLECULAR ANALYSES WERE CONDUCTED UNDER THE CURRENT AUSTRIAN LAWS AND FOLLOWING THE ASAB GUIDELINES. THANKS TO CHRISTIAN BARANYI AND MAX RINGLER FOR COMMENTS ON THE MANUSCRIPT.	NA	1877-7252	CONSERV. GENET. RESOUR.	CONSERVATION GENETICS RESOURCES	ENGLISH	NA	SEP	NA	29	3	NA	, EVA/0000-0003-3273-6568	NA	815-819	SPRINGER	BIODIVERSITY \& CONSERVATION; GENETICS \& HEREDITY	, EVA/F-9064-2014	NA	3	THE USE OF CROSS-SPECIES TESTING OF MICROSATELLITE MARKERS AND SIBSHIP ANALYSIS IN EX SITU POPULATION MANAGEMENT	ARTICLE	0	34	4	BIODIVERSITY CONSERVATION; GENETICS \& HEREDITY
ISI000307490700005	rejected off topic illegal trade	Ada Sanchez	RUBINSTEIN J, 2012, J EXOT PET MED	RUBINSTEIN J;LIGHTFOOT T	FEATHER DESTRUCTIVE BEHAVIOR; PSITTACINE; BEHAVIORAL DISORDER;; FEATHER-PICKING; AVIAN BEHAVIOR	WHITE-CROWNED SPARROWS; PSITTACINE BIRDS; AMAZON PARROTS; DISEASE VIRUS;; PICKING; CLOMIPRAMINE; BEAK; SKIN; SENSITIVITY; DISORDER	RUBINSTEIN, J (CORRESPONDING AUTHOR), BLUEPEARL VET PARTNERS, 3000 BUSCH LAKE BLVD, TAMPA, FL 33614 USA.; RUBINSTEIN, JONATHAN; LIGHTFOOT, TERESA, FLORIDA VET SPECIALISTS, TAMPA, FL USA.	FEATHER LOSS IN PSITTACINE BIRDS IS AN EXTREMELY COMMON AND EXTREMELY FRUSTRATING CLINICAL PRESENTATION. CAUSES INCLUDE MEDICAL AND NON-MEDICAL CAUSES OF FEATHER LOSS BOTH WITH AND WITHOUT OVERT FEATHER DESTRUCTIVE BEHAVIOR. UNDERLYING CAUSES ARE MYRIAD AND INCLUDE INAPPROPRIATE HUSBANDRY AND HOUSING PARASITIC, VIRAL AND BACTERIAL INFECTIONS; METABOLIC AND ALLERGIC DISEASES; AND BEHAVIORAL DISORD…	360 PARK AVE SOUTH, NEW YORK, NY 10010-1710 USA	NA	JON.RUBINSTEIN.DVM@GMAIL.COM	NA	NA	NA	2020-10-23	988KU	10.1053/j.jepm.2012.06.024	NA	NA	1931-6283	NA	NA	NA	NA	NA	1557-5063	J. EXOT. PET MED.	JOURNAL OF EXOTIC PET MEDICINE	ENGLISH	NA	JUL	NA	97	3	NA	NA	NA	219-234	ELSEVIER SCIENCE INC	VETERINARY SCIENCES	NA	NA	9	FEATHER LOSS AND FEATHER DESTRUCTIVE BEHAVIOR IN PET BIRDS	REVIEW	0	63	21	VETERINARY SCIENCES
ISI000307762000021	rejected illegal trade circunstancial	Ada Sanchez	WENNER TJ, 2012, CONSERV GENET	WENNER TJ;RUSSELLO MA;WRIGHT TF	CRYPTIC SPECIES; MEALY AMAZON; NEOTROPICS; PARROTS; SPECIES COMPLEX	MAXIMUM-LIKELIHOOD; PHYLOGENY; BIOGEOGRAPHY; DIVERSITY; TAXONOMY	WENNER, TJ (CORRESPONDING AUTHOR), UNIV TASMANIA, SCH ZOOL, PRIVATE BAG 5, HOBART, TAS 7001, AUSTRALIA.; WENNER, THEODORE J.; WRIGHT, TIMOTHY F., NEW MEXICO STATE UNIV, DEPT BIOL, LAS CRUCES, NM 88003 USA.; RUSSELLO, MICHAEL A., UNIV BRITISH COLUMBIA, DEPT BIOL, KELOWNA, BC V1V 1V7, CANADA.	THE APPLICATION OF GENETIC APPROACHES HAS ENHANCED THE IDENTIFICATION OF CRYPTIC SPECIES IN A WIDE VARIETY OF TAXA, OFTEN WITH IMMEDIATE CONSERVATION IMPLICATIONS. HERE, WE EMPLOYED MULTILOCUS DNA ANALYSES TO ASSESS GENETIC VARIATION AND ITS CORRESPONDENCE TO TAXONOMY WITHIN THE MEALY AMAZON (AMAZONA FARINOSA), A PARROT SPECIES FOUND IN CENTRAL AND SOUTH AMERICA. DNA SEQUENCE DATA FROM FOUR MITOC…	VAN GODEWIJCKSTRAAT 30, 3311 GZ DORDRECHT, NETHERLANDS	NA	THEODORE.WENNER@UTAS.EDU.AU MICHAEL.RUSSELLO@UBC.CA WRIGHT@NMSU.EDU	NA	NA	NA	2020-10-23	992FW	10.1007/s10592-012-0364-8	NA	NA	1572-9737	NA	NA	WORLD PARROT TRUST	WE ARE GRATEFUL TO THE FOLLOWING INSTITUTIONS FOR PROVIDING SAMPLES: ACADEMY OF NATURAL SCIENCES, PHILADELPHIA; FIELD MUSEUM OF NATURAL HISTORY; LOUISIANA STATE UNIVERSITY MUSEUM OF NATURAL SCIENCES; ROYAL ONTARIO MUSEUM; SMITHSONIAN NATIONAL MUSEUM OF NATURAL HISTORY; UNIVERSITY OF KANSAS NATURAL HISTORY MUSEUM. WE ALSO THANK J GILARDI FOR USEFUL COMMENTS ON THIS MANUSCRIPT AND K WENNER-SHERRELL…	NA	1566-0621	CONSERV. GENET.	CONSERVATION GENETICS	ENGLISH	NA	OCT	NA	30	5	NA	NA	NA	1427-1432	SPRINGER	BIODIVERSITY \& CONSERVATION; GENETICS \& HEREDITY	NA	NA	10	CRYPTIC SPECIES IN A NEOTROPICAL PARROT: GENETIC VARIATION WITHIN THE AMAZONA FARINOSA SPECIES COMPLEX AND ITS CONSERVATION IMPLICATIONS	ARTICLE	0	26	13	BIODIVERSITY CONSERVATION; GENETICS \& HEREDITY
ISI000308786400018	rejected off topic illegal trade	Ada Sanchez	AVERY ML, 2012, WILSON J ORNITHOL	AVERY ML;TILLMAN EA;KEACHER KL;ARNETT JE;LUNDY KJ	NA	MYIOPSITTA-MONACHUS; GENETIC-EVIDENCE; HYDE-PARK; GROWTH; SIZE;; DISPERSAL; RECESSION	AVERY, ML (CORRESPONDING AUTHOR), WILDLIFE SERV, USDA, NATL WILDLIFE RES CTR, FLORIDA FIELD STN, 2820 E UNIV AVE, GAINESVILLE, FL 32641 USA.; AVERY, MICHAEL L.; TILLMAN, ERIC A.; KEACHER, KANDY L.; LUNDY, KELLI J., WILDLIFE SERV, USDA, NATL WILDLIFE RES CTR, FLORIDA FIELD STN, GAINESVILLE, FL 32641 USA.; ARNETT, JOHN E., UNIV FLORIDA, DEPT WILDLIFE ECOL \& CONSERVAT, GAINESVILLE, FL 32611 USA.	MONK PARAKEETS (MYIOPSITTA MONACHUS) HAVE BEEN IN FLORIDA FOR >40 YRS, HAVING BEEN IMPORTED BY THE THOUSANDS FOR THE PET TRADE. THIS CONSPICUOUS, CHARISMATIC SPECIES IS NOW WIDELY ESTABLISHED, BUT RELATIVELY LITTLE IS KNOWN ABOUT ITS POPULATION BIOLOGY OUTSIDE SOUTH AMERICA. WE EXAMINED 845 PARAKEETS FROM 385 NESTS FROM NEST REMOVALS AND COLLECTIONS BY UTILITY COMPANY PERSONNEL IN 2003/2004 AND 2…	5400 BOSQUE BLVD, STE 680, WACO, TX 76710 USA	NA	MICHAEL.L.AVERY@APHIS.USDA.GOV	NA	NA	NA	2020-10-23	005YQ	10.1676/11-188.1	NA	NA	1938-5447	NA	NA	NATIONAL WILDLIFE RESEARCH CENTERUNITED STATES DEPARTMENT OF AGRICULTURE (USDA); FLORIDA POWER AND LIGHT (FPL) COMPANY; PANDION SYSTEMS INC.	FUNDING WAS PROVIDED BY THE NATIONAL WILDLIFE RESEARCH CENTER AND FLORIDA POWER AND LIGHT (FPL) COMPANY THROUGH A COOPERATIVE RESEARCH AGREEMENT WITH PANDION SYSTEMS INC. (J. R. NEWMAN, PRESIDENT). WE APPRECIATE THE FIELD ASSISTANCE AND SUPPORT PROVIDED BY J. R. LINDSAY, BUDDY MERCHANT, DONALD HOFFMEIER, AND JOSEPH WRIGHT OF FPL DURING THE PROJECT. J. R. EBERHARD PROVIDED HELPFUL COMMENTS ON AN E…	NA	1559-4491	WILSON J. ORNITHOL.	WILSON JOURNAL OF ORNITHOLOGY	ENGLISH	NA	SEP	NA	34	3	NA	NA	NA	581-588	WILSON ORNITHOLOGICAL SOC	ZOOLOGY	NA	NA	9	BIOLOGY OF INVASIVE MONK PARAKEETS IN SOUTH FLORIDA	ARTICLE	0	33	124	ORNITHOLOGY
ISI000309945200001	included in review	Ada Sanchez	KOLESNIKOVAS CKM, 2012, J AVIAN MED SURG	KOLESNIKOVAS CKM;NIEMEYER C;TEIXEIRA RHF;NUNES ALV;RAMEH-DE-ALBUQUERQUE LC;SANT'ANNA SS;CATAO-DIAS JL	HEMATOLOGY; PLASMA BIOCHEMICAL ANALYSIS; AVIAN; HYACINTH MACAW;; ANODORHYNCUS HYACINTHINUS	CHEMISTRY VALUES	KOLESNIKOVAS, CKM (CORRESPONDING AUTHOR), ASSOC R3 ANIM, RODOVIA JOAO GUALBERTO SOARES,ENTRADA PARQUE ESTA, BR-88061500 FLORIANOPOLIS, SC, BRAZIL.; KOLESNIKOVAS, CRISTIANE K. M., ASSOC R3 ANIM, BR-88061500 FLORIANOPOLIS, SC, BRAZIL.; NIEMEYER, CLAUDIA; RAMEH-DE-ALBUQUERQUE, LUCIANA C.; SANT'ANNA, SAVIO S.; CATAO-DIAS, JOSE L., UNIV SAO PAULO, FAC MED VET \& ZOOTECNIA, LAB PATOL COMPARADA ANIM SEL…	THE HYACINTH MACAW (ANODORHYNCUS HYACINTHINUS), CONSIDERED THE LARGEST PSITTACINE BIRD SPECIES IN THE WORLD, IS AN ENDANGERED SPECIES, WITH A REMAINING POPULATION OF APPROXIMATELY 6500 BIRDS IN THE WILD. TO ESTABLISH HEMATOLOGIC AND PLASMA BIOCHEMICAL REFERENCE RANGES AND TO VERIFY DIFFERENCES RELATED TO SEX, SAMPLES FROM 29 HYACINTH MACAWS (14 MALES. 15 FEMALES) WERE OBTAINED FROM BIRDS APPREHEN…	PO BOX 811720, BOCA RATON, FL 33481 USA	NA	NA	NA	NA	NA	2020-10-23	022GH	10.1647/2011-020R1.1	NA	NA	NA	NA	NA	FUNDACAO DE AMPARO A PESQUISA DO ESTADO DE SAO PAULOFUNDACAO DE AMPARO A PESQUISA DO ESTADO DE SAO PAULO (FAPESP); CONSELHO NACIONAL DE DESENVOLVIMENTO CIENTIFICO E TECNOLOGICO, LAGO SUL-BRASILIA-DF-BRAZIL	THIS RESEARCH WAS SUPPORTED BY THE FUNDACAO DE AMPARO A PESQUISA DO ESTADO DE SAO PAULO. J.L. CATAO-DIAS IS THE RECIPIENT OF A SCHOLARSHIP BY CONSELHO NACIONAL DE DESENVOLVIMENTO CIENTIFICO E TECNOLOGICO, LAGO SUL-BRASILIA-DF-BRAZIL.	NA	1082-6742	J. AVIAN MED. SURG.	JOURNAL OF AVIAN MEDICINE AND SURGERY	ENGLISH	NA	SEP	NA	23	3	NA	CATAO-DIAS, JOSE LUIZ/0000-0003-2999-3395 SANT'ANNA, SAVIO/0000-0003-2224-0913	NA	125-129	ASSOC AVIAN VETERINARIANS	VETERINARY SCIENCES	CATAO-DIAS, JOSE LUIZ/C-4897-2012 SANT'ANNA, SAVIO/I-5217-2016	NA	4	HEMATOLOGIC AND PLASMA BIOCHEMICAL VALUES OF HYACINTH MACAWS (ANODORHYNCHUS HYACINTHINUS)	ARTICLE	0	24	26	VETERINARY SCIENCES
ISI000312435500006	included in review	Ada Sanchez	MILLER AD, 2013, MOL BIOL REP	MILLER AD;GOOD RT;COLEMAN RA;LANCASTER ML;WEEKS AR	NEOPHEMA CHRYSOGASTER; MICROSATELLITE LIBRARY DEVELOPMENT; MITOCHONDRIAL; GENOME SEQUENCE; NEXT GENERATION DNA SEQUENCING; DE NOVO GENOME ASSEMBLY	POPULATION-SIZE; AUSTRALIA; EVOLUTION; FREQUENCY; PRIMERS; MARKERS;; MODEL; FISH	MILLER, AD (CORRESPONDING AUTHOR), CESAR, 293 ROYAL PARADE, PARKVILLE, VIC 3052, AUSTRALIA.; MILLER, ADAM D.; WEEKS, ANDREW R., CESAR, PARKVILLE, VIC 3052, AUSTRALIA.; MILLER, ADAM D.; COLEMAN, RHYS A., UNIV MELBOURNE, DEPT ZOOL, PARKVILLE, VIC 3010, AUSTRALIA.; GOOD, ROBERT T.; WEEKS, ANDREW R., UNIV MELBOURNE, DEPT GENET, PARKVILLE, VIC 3010, AUSTRALIA.; COLEMAN, RHYS A., MELBOURNE WATER CORP, …	A SUITE OF POLYMORPHIC MICROSATELLITE MARKERS AND THE COMPLETE MITOCHONDRIAL GENOME SEQUENCE WAS DEVELOPED BY NEXT GENERATION SEQUENCING (NGS) FOR THE CRITICALLY ENDANGERED ORANGE-BELLIED PARROT, NEOPHEMA CHRYSOGASTER. A TOTAL OF 14 POLYMORPHIC LOCI WERE IDENTIFIED AND CHARACTERIZED USING DNA EXTRACTIONS REPRESENTING 40 INDIVIDUALS FROM MELALEUCA, TASMANIA, SAMPLED IN 2002. WE OBSERVED MODERATE G…	VAN GODEWIJCKSTRAAT 30, 3311 GZ DORDRECHT, NETHERLANDS	NA	ADMILLER@UNIMELB.EDU.AU	NA	NA	NA	2020-10-23	055RV	10.1007/s11033-012-1950-z	NA	NA	NA	NA	NA	NA	NA	NA	0301-4851	MOL. BIOL. REP.	MOLECULAR BIOLOGY REPORTS	ENGLISH	NA	JAN	NA	35	1	NA	WEEKS, ANDREW/0000-0003-3081-135X	NA	35-42	SPRINGER	BIOCHEMISTRY \& MOLECULAR BIOLOGY	NA	NA	21	MICROSATELLITE LOCI AND THE COMPLETE MITOCHONDRIAL DNA SEQUENCE CHARACTERIZED THROUGH NEXT GENERATION SEQUENCING AND DE NOVO GENOME ASSEMBLY FOR THE CRITICALLY ENDANGERED ORANGE-BELLIED PARROT, NEOPHEMA CHRYSOGASTER	ARTICLE	0	65	40	BIOCHEMISTRY \& MOLECULAR BIOLOGY
ISI000313184200005	rejected off topic illegal trade	Ada Sanchez	HASIRI MA, 2013, ACTA SCI VET	HASIRI MA;AHMADABADI HN;TABRIZI AS	PARROT FOOT NECROSIS; AFRICAN GRAY PARROT; CRACK USE; COCAINE USE; AVIAN; PATHOLOGY; DIGIT NECROSIS	FLOW	HASIRI, MA (CORRESPONDING AUTHOR), SHIRAZ UNIV, DEPT CLIN STUDIES, SCH VET MED, SHIRAZ 71345, IRAN.; HASIRI, MOHAMMAD ABBASZADEH; AHMADABADI, HASSAN NILI; TABRIZI, AIDIN SHOJAEE, SHIRAZ UNIV, DEPT CLIN STUDIES, SCH VET MED, SHIRAZ 71345, IRAN.	BACKGROUND: PARROT FOOT NECROSIS IS A POORLY UNDERSTOOD DERMATITIS WITH DIFFICULT DIAGNOSIS AND TREATMENT THAT HAS BEEN REPORTED IN ALL SPECIES OF AMAZON PARROTS. DIAGNOSIS IS USUALLY ACHIEVED BY DETAILED HISTORY AND RULING OUT OTHER CAUSES THROUGH EVALUATION OF CBC AND BIOCHEMICAL PROFILE. PROLONGED CRACK-COCAINE MISUSE COULD CAUSE DIGIT OR NAIL LESIONS IN HUMANS. IN THIS REPORT SIMILAR CLINICAL…	FAC VET, CAIXA POSTAL 15017, PORTO ALEGRE RS, 91501-570, BRAZIL	5	ABBASZADEH@SHIRAZU.AC.IR	NA	NA	NA	2020-10-23	065XT	NA	NA	NA	1679-9216	NA	NA	NA	NA	NA	1678-0345	ACTA SCI. VET.	ACTA SCIENTIAE VETERINARIAE	ENGLISH	NA	NA	NA	12	1	NA	NA	NA	NA	UNIV FED RIO GRANDE DO SUL	VETERINARY SCIENCES	NA	NA	0	CAN CHRONIC CRACK-COCAINE EXPOSURE CAUSE PARROT FOOT NECROSIS? A POSSIBLE HYPOTHESIS	ARTICLE	0	9	41	VETERINARY SCIENCES
ISI000313725600006	rejected off topic illegal trade	Ada Sanchez	VAN ZEELAND YRA, 2013, J VET PHARMACOL THER	VAN ZEELAND YRA;SCHOEMAKER NJ;HARITOVA A;SMIT JW;VAN MAARSEVEEN EM;LUMEIJ JT;FINK-GREMMELS J	NA	PLASMA-LEVELS; GASTRIC PH; ANTIDEPRESSANTS; AMITRIPTYLINE; PHARMACOLOGY;; TEMPERATURE; METABOLISM; ANIMALS; BIRDS	VAN ZEELAND, YRA (CORRESPONDING AUTHOR), UNIV UTRECHT, FAC VET MED, DEPT CLIN SCI COMPAN ANIM, DIV ZOOL MED, YALELAAN 108, NL-3584 CM UTRECHT, NETHERLANDS.; VAN ZEELAND, Y. R. A.; SCHOEMAKER, N. J.; SMIT, J. W.; LUMEIJ, J. T., UNIV UTRECHT, FAC VET MED, DEPT CLIN SCI COMPAN ANIM, DIV ZOOL MED, NL-3584 CM UTRECHT, NETHERLANDS.; HARITOVA, A., TRAKIA UNIV, FAC VET MED, DEPT PHARMACOL TOXICOL \& THER…	VAN ZEELAND, Y. R. A., SCHOEMAKER, N. J., HARITOVA, A., SMIT, J. W., VAN MAARSEVEEN, E. M., LUMEIJ, J. T., FINK-GREMMELS, J. PHARMACOKINETICS OF PAROXETINE, A SELECTIVE SEROTONIN REUPTAKE INHIBITOR, IN GREY PARROTS (PSITTACUS ERITHACUS ERITHACUS): INFLUENCE OF PHARMACEUTICAL FORMULATION AND LENGTH OF DOSING. J. VET. PHARMACOL. THERAP. 36, 51-58. PAROXETINE, A SELECTIVE SEROTONIN REUPTAKE INHIBITO…	111 RIVER ST, HOBOKEN 07030-5774, NJ USA	NA	Y.R.A.VANZEELAND@UU.NL	NA	NA	NA	2020-10-23	073EF	10.1111/j.1365-2885.2012.01391.x	NA	NA	1365-2885	NA	NA	NA	NA	NA	0140-7783	J. VET. PHARMACOL. THER.	JOURNAL OF VETERINARY PHARMACOLOGY AND THERAPEUTICS	ENGLISH	NA	FEB	NA	53	1	NA	MILANOVA, ANELIYA/0000-0002-6876-9436	NA	51-58	WILEY	PHARMACOLOGY \& PHARMACY; VETERINARY SCIENCES	FINK-GREMMELS, JOHANNA/G-3707-2012 MILANOVA, ANELIYA/I-8831-2019	NA	5	PHARMACOKINETICS OF PAROXETINE, A SELECTIVE SEROTONIN REUPTAKE INHIBITOR, IN GREY PARROTS (PSITTACUS ERITHACUS ERITHACUS): INFLUENCE OF PHARMACEUTICAL FORMULATION AND LENGTH OF DOSING	ARTICLE	1	27	36	PHARMACOLOGY \& PHARMACY; VETERINARY SCIENCES
ISI000314535600077	included in review	Ada Sanchez	FERNANDES GA, 2013, MOL BIOL REP	FERNANDES GA;CAPARROZ R	ARA ARARAUNA; CONSERVATION; ILLEGAL TRADE; MACAW; MITOCHONDRIAL DNA;; PARROT	MITOCHONDRIAL-DNA; RISKS	CAPARROZ, R (CORRESPONDING AUTHOR), UNIV BRASILIA, FAC UNB PLANALTINA, AREA UNIV 1,VILA NOSSA SENHORA FATIMA, BR-73340710 PLANALTINA, DF, BRAZIL.; FERNANDES, GISLAINE A., UNIV FED GOIAS, INST CIENCIAS BIOL, DEPT BIOL GERAL, LAB GENET \& BIODIVERSIDADE, GOIANIA, GO, BRAZIL.; CAPARROZ, RENATO, UNIV BRASILIA, FAC UNB PLANALTINA, BR-73340710 PLANALTINA, DF, BRAZIL.	THE ILLEGAL WILDLIFE TRADE IS ONE OF THE MAJOR THREATS TO BRAZIL'S BIODIVERSITY. APPROXIMATELY 80 \% OF ILLEGALLY CAPTURED ANIMALS ARE BIRDS, AND 4 \% OF THOSE ARE PARROTS. ALTHOUGH MANY SEIZED BIRDS DO NOT SURVIVE, THOSE THAT ARE RECOVERED MAY BE RETURNED TO THE WILD. THE RELEASE OF SEIZED INDIVIDUALS INTO THE WILD SHOULD BE CONDUCTED WITH CAUTION, AS LOCAL POPULATIONS MAY SUFFER ADVERSE EFFECTS…	VAN GODEWIJCKSTRAAT 30, 3311 GZ DORDRECHT, NETHERLANDS	NA	RENATOCZ@YAHOO.COM.BR	NA	NA	NA	2020-10-23	084JQ	10.1007/s11033-012-2294-4	NA	NA	NA	NA	NA	FUNDACAO DE APOIO A PESQUISA DO ESTADO DE GOIAS/FAPEG-PRONEX [CHAMADA 07/2009]	THE AUTHORS ARE VERY GRATEFUL TO EDUARDO BARROS FOR TECHNICAL ASSISTANCE IN BIRD SAMPLING, DR. CRISTINA Y. MIYAKI FOR PROVIDING PRIMERS AND SAMPLES, DR. MARIANA PIRES DE CAMPOS TELLES AND LEO CAETANO DA SILVA FOR TECHNICAL SUPPORT AND SUGGESTIONS, AND TWO ANONYMOUS REVIEWERS FOR THEIR COMMENTS. THIS STUDY WAS SUPPORTED BY FUNDACAO DE APOIO A PESQUISA DO ESTADO DE GOIAS/FAPEG-PRONEX CHAMADA 07/200…	NA	0301-4851	MOL. BIOL. REP.	MOLECULAR BIOLOGY REPORTS	ENGLISH	NA	MAR	NA	22	3	NA	FERNANDES, GISLAINE/0000-0002-2905-2459	NA	2757-2762	SPRINGER	BIOCHEMISTRY \& MOLECULAR BIOLOGY	NA	NA	8	DNA SEQUENCE ANALYSIS TO GUIDE THE RELEASE OF BLUE-AND-YELLOW MACAWS (ARA ARARAUNA, PSITTACIFORMES, AVES) FROM THE ILLEGAL TRADE BACK INTO THE WILD	ARTICLE	0	57	40	BIOCHEMISTRY \& MOLECULAR BIOLOGY
ISI000315033000005	rejected off topic (not related to taxon)	JRFP	QUINTANA M, 2013, MED VET ENTOMOL	QUINTANA M;SALOMON O;GUERRA R;LIZARRALDE DE GROSSO M;FUENZALIDA A	CUTANEOUS LEISHMANIASIS; ECOLOGICAL NICHE MODELS; PHLEBOTOMINAE; RISK; MAP; ARGENTINA	SAND FLIES DIPTERA; TEGUMENTARY LEISHMANIASIS; CLIMATE-CHANGE;; TRANSMISSION; PSYCHODIDAE; PATTERNS; VECTORS; DISTRIBUTIONS; OUTBREAK;; PROVINCE	QUINTANA, M (CORRESPONDING AUTHOR), FAC CIENCIAS NAT, MIGUEL LILLO 205, RA-4000 SAN MIGUEL DE TUCUMAN, ARGENTINA.; QUINTANA, M.; LIZARRALDE DE GROSSO, M.; FUENZALIDA, A., UNIV NACL TUCUMAN, INST SUPER ENTOMOL, RA-4000 SAN MIGUEL DE TUCUMAN, TUCUMAN, ARGENTINA.; SALOMON, O., MINIST SALUD NAC, INST NACL MED TROP, PUERTO IGUAZU, ARGENTINA.; GUERRA, R., DELEGAC REG NOROESTE, ADM PARQUES NAC, SALTA, A…	IN ARGENTINA, 58.2\% OUT OF THE 8126 CUTANEOUS LEISHMANIASIS (CL) INCIDENT CASES ACCUMULATED FROM 1954 TO 2006 WERE REPORTED IN THE PROVINCES OF SALTA AND JUJUY. THE AIM OF THIS STUDY WAS TO DEVELOP AN EXPLORATORY RISK MAP AND A POTENTIAL DISTRIBUTION MAP OF THE VECTOR, IN ORDER TO OFFER RECOMMENDATIONS FOR CL PREVENTION. A TOTAL OF 12 079 PHLEBOTOMINAE (DIPTERA: PSYCHODIDAE) BELONGING TO THE SPE…	111 RIVER ST, HOBOKEN 07030-5774, NJ USA	NA	GABRIELADELAQUINTANA@GMAIL.COM	NA	NA	NA	2020-10-23	091EU	10.1111/j.1365-2915.2012.01033.x	NA	NA	1365-2915	NA	NA	[PICTR 275-ANPCYT]; [PIP-CONICET 0696]; [FOCANLIS 09]	THE AUTHORS WOULD LIKE TO THANK ADMINISTRACION DE PARQUES NACIONALES (APN), HEAD AND STAFF OF THE NATIONAL PARKS: BARITU, CALILEGUA, EL REY. DELEGATION SALTA: MARCOS COSTILLA. APN BS AS: MISSES GRACE ANTONIETTI AND ALICIA LIVA (MANAGEMENT). OFFICIALS AND STAFF OF THE MINISTRY OF HEALTH OF THE NATION, ANLIS, CENDIE, DIRECTION OF EPIDEMIOLOGY, DR MARIO ZAIDENBERG CNCV SALTA, STAFF GUEMES DELEGATION…	NA	0269-283X	MED. VET. ENTOMOL.	MEDICAL AND VETERINARY ENTOMOLOGY	ENGLISH	NA	MAR	NA	47	1	NA	NA	NA	39-48	WILEY	ENTOMOLOGY; VETERINARY SCIENCES	NA	NA	34	PHLEBOTOMINAE OF EPIDEMIOLOGICAL IMPORTANCE IN CUTANEOUS LEISHMANIASIS IN NORTHWESTERN ARGENTINA: RISK MAPS AND ECOLOGICAL NICHE MODELS	ARTICLE	0	20	27	ENTOMOLOGY; VETERINARY SCIENCES
ISI000316366700002	included in review	Ada Sanchez	NOBREGA ALVES RR, 2013, J ETHNOBIOL ETHNOMED	NOBREGA ALVES RR;LOURENCO LEITE WM;BEZERRA A	NA	ANIMAL-BASED REMEDIES; ILLEGAL PARROT TRADE; SANTA-CRUZ; MARKETS; NE;; REGION; FRAGMENTATION; KNOWLEDGE; TRENDS; IMPACT	ALVES, RRN (CORRESPONDING AUTHOR), UNIV ESTADUAL PARAIBA, DEPT BIOL, AV BARAUNAS,351 CAMPUS UNIV, CAMPINA GRANDE, PB, BRAZIL.; NOBREGA ALVES, RAMULO ROMEU, UNIV ESTADUAL PARAIBA, DEPT BIOL, CAMPINA GRANDE, PB, BRAZIL.; NOBREGA ALVES, RAMULO ROMEU; LOURENCO LEITE, RAILSON CIDENNYS, UNIV ESTADUAL PARAIBA, DEPT BIOL, CAMPINA GRANDE, PB, BRAZIL.; SILVA SOUTO, WEDSON MEDEIROS; BEZERRA, DANDARA M. M.; …	THE UTILIZATION OF BIRDS AS PETS HAS BEEN RECOGNIZED AS ONE OF THE PRINCIPAL THREATS TO GLOBAL AVIFAUNA. MOST OF THE INFORMATION ABOUT THE USE AND SALE OF BIRDS AS PETS HAS BEEN LIMITED TO AREAS OF HIGH BIODIVERSITY AND WHOSE IMPACTS OF ANTHROPIC ACTIONS HAVE BEEN WIDELY BROADCAST INTERNATIONALLY, FOR EXAMPLE FOR THE AMAZON FOREST AND FOREST REMNANTS OF SOUTHEAST ASIA. THE CAATINGA PREDOMINATES I…	CAMPUS, 4 CRINAN ST, LONDON N1 9XW, ENGLAND	14	ROMULO\_NOBREGA@YAHOO.COM.BR	NA	NA	NA	2020-10-23	109KR	10.1186/1746-4269-9-14	NA	NA	1746-4269	NA	NA	CNPQ/EDITAL UNIVERSAL PROGRAMNATIONAL COUNCIL FOR SCIENTIFIC AND TECHNOLOGICAL DEVELOPMENT (CNPQ) [486005/2011-9, 476460/2012-3]; UEPB/PROPESQ; CNPQ (CONSELHO NACIONAL DE DESENVOLVIMENTO CIENTIFICO E TECNOLOGICO)NATIONAL COUNCIL FOR SCIENTIFIC AND TECHNOLOGICAL DEVELOPMENT (CNPQ)	THE AUTHORS WOULD LIKE TO ACKNOWLEDGE TO CNPQ/EDITAL UNIVERSAL PROGRAM (486005/2011-9 AND 476460/2012-3) AND TO UEPB/PROPESQ (2011) FOR FINANCIAL SUPPORT. THE FIRST AUTHOR WOULD LIKE TO ACKNOWLEDGE TO CNPQ (CONSELHO NACIONAL DE DESENVOLVIMENTO CIENTIFICO E TECNOLOGICO) FOR PROVIDING A RESEARCH FELLOWSHIP. SPECIAL THANKS ARE DUE TO ALL INTERVIEWEES, WHO KINDLY SHARED THEIR KNOWLEDGE WITH US. DR. A…	NA	NA	J. ETHNOBIOL. ETHNOMED.	JOURNAL OF ETHNOBIOLOGY AND ETHNOMEDICINE	ENGLISH	NA	FEB 27	NA	98	NA	DOAJ GOLD, GREEN PUBLISHED	ALVES, ROMULO ROMEU NOBREGA/0000-0001-6824-0797	NA	NA	BMC	BIODIVERSITY \& CONSERVATION; PLANT SCIENCES; PHARMACOLOGY \& PHARMACY	LOURES-RIBEIRO, ALAN/G-2082-2012 ALVES, ROMULO ROMEU NOBREGA/A-7026-2009	NA	24	ETHNO-ORNITHOLOGY AND CONSERVATION OF WILD BIRDS IN THE SEMI-ARID CAATINGA OF NORTHEASTERN BRAZIL	ARTICLE	0	46	9	BIODIVERSITY CONSERVATION; PLANT SCIENCES; PHARMACOLOGY \& PHARMACY
ISI000318245400003	rejected off topic illegal trade	Ada Sanchez	CIRCELLA E, 2012, VETERINARIA	CIRCELLA E;CAROLI A;PUGLIESE N;LEGRETTO M;TODISCO G;DI PAOLA G;CAMARDA A	CIRCOVIRUS; PET BIRDS; DIAGNOSIS; PCR	FEATHER-DISEASE-VIRUS; PSITTACINE BEAK	CIRCELLA, E (CORRESPONDING AUTHOR), UNIV BARI, FAC MED VET, DIPARTIMENTO SANITA PUBBL \& ZOOTECN, I-70121 BARI, ITALY.; CIRCELLA, ELENA; CAROLI, ANNA; PUGLIESE, NICOLA; LEGRETTO, MARILISA; DI PAOLA, GIANCARLO; CAMARDA, ANTONIO, UNIV BARI, FAC MED VET, DIPARTIMENTO SANITA PUBBL \& ZOOTECN, I-70121 BARI, ITALY.; TODISCO, GIANLUCA, UNIV TERAMO, FAC MED VET, DIPARTIMENTO SCI BIOMED \& COMPARAT, TERAM…	IN THIS STUDY, WE REPORT OUR CLINICAL AND LABORATORY EXPERIENCES ABOUT CIRCOVIRUS INFECTION IN PET BIRDS. IN THE MOST CASES, TYPICAL CHANGES IN FEATHERS HAVE NOT BEEN OBSERVED. LESIONS OF THE BEAK WERE NEVER PRESENT. ON THE CONTRARY, THE RATE OF POSITIVITY WAS PARTICULARLY HIGH IN BIRDS WITHOUT FEATHERS DISORDERS BUT OFTEN SUSCEPTIBLE TO BACTERIAL AND PARASITIC SECONDARY INFECTION PROBABLY DUE TO…	PALAZZO TRECCHI, CREMONA, ITALY	NA	NA	NA	NA	NA	2020-10-23	134WB	NA	NA	NA	NA	NA	NA	NA	NA	NA	0394-3151	VETERINARIA	VETERINARIA	ITALIAN	NA	DEC	NA	20	6	NA	CIRCELLA, ELENA/0000-0001-9625-2920 PUGLIESE, NICOLA/0000-0001-9342-9516 CAMARDA, ANTONIO/0000-0002-3961-585X	NA	15	SCIVAC	VETERINARY SCIENCES	NA	NA	0	CIRCOVIRUS INFECTION IN PET BIRDS: CLINICAL AND MOLECULAR APPROACH IN DIAGNOSIS	ARTICLE	0	13	26	VETERINARY SCIENCES
ISI000318462800019	rejected off topic illegal trade	Ada Sanchez	JULIAN L, 2013, J GEN VIROL	JULIAN L;PIASECKI T;CHRZASTEK K;WALTERS M;MUHIRE B;HARKINS GW;MARTIN DP;VARSANI A	NA	AFRICAN GREY PARROTS; PSITTACINE BEAK; PHYLOGENETIC ANALYSIS;; MAXIMUM-LIKELIHOOD; DNA; BIRDS; IDENTIFICATION; GEMINIVIRUSES;; ALGORITHM; SEQUENCES	PIASECKI, T (CORRESPONDING AUTHOR), WROCLAW UNIV ENVIRONM \& LIFE SCI, FAC VET MED, DEPT EPIZOOTIOL CLIN BIRDS \& EXOT ANIM, PL-50360 WROCLAW, POLAND.; JULIAN, LAUREL; WALTERS, MATTHEW; VARSANI, ARVIND, UNIV CANTERBURY, SCH BIOL SCI, CHRISTCHURCH 8140, NEW ZEALAND.; PIASECKI, TOMASZ; CHRZASTEK, KLAUDIA, WROCLAW UNIV ENVIRONM \& LIFE SCI, FAC VET MED, DEPT EPIZOOTIOL CLIN BIRDS \& EXOT ANIM, PL-50…	BEAK AND FEATHER DISEASE VIRUS (BFDV) CAUSES THE HIGHLY CONTAGIOUS, IN SOME CASES FATAL, PSITTACINE BEAK AND FEATHER DISEASE IN PARROTS. THE EUROPEAN CONTINENT HAS NO NATIVE PARROTS, YET IN THE PAST HAS BEEN ONE OF THE WORLD'S BIGGEST IMPORTERS OF WILD-CAUGHT EXOTIC PARROT SPECIES. FOLLOWING THE BANNING OF THIS PRACTICE IN 2007, THE DEMAND FOR EXOTIC PET PARROTS HAS LARGELY BEEN MET BY ESTABLISHE…	CHARLES DARWIN HOUSE, 12 ROGER ST, LONDON WC1N 2JU, ERKS, ENGLAND	NA	TOMASZ.PIASECKI@UP.WROC.PL ARVIND.VARSANI@CANTERBURY.AC.NZ	NA	NA	NA	2020-10-23	137UD	10.1099/vir.0.050179-0	NA	NA	1465-2099	NA	NA	UNIVERSITY OF CAPE TOWN, SOUTH AFRICA; POLISH MINISTRY OF EDUCATION AND SCIENCEMINISTRY OF SCIENCE AND HIGHER EDUCATION, POLAND [N308 036 32/3369]	THE RESEARCH WAS SUPPORTED BY A UNIVERSITY OF CAPE TOWN, SOUTH AFRICA BLOCK GRANT AWARDED TO A. V. AND THE POLISH MINISTRY OF EDUCATION AND SCIENCE GRANT (NO. N308 036 32/3369) AWARDED TO T. P. THE AUTHORS WOULD LIKE TO THANK THE VARIOUS BREEDING FACILITIES IN POLAND THAT PROVIDED ACCESS TO SAMPLE THEIR BIRDS.	NA	0022-1317	J. GEN. VIROL.	JOURNAL OF GENERAL VIROLOGY	ENGLISH	NA	MAY	NA	44	5	BRONZE	PIASECKI, TOMASZ/0000-0003-2934-1688 HARKINS, GORDON W/0000-0003-0041-8047 WALTERS, MATTHEW/0000-0001-9075-4217	NA	1086-1095	MICROBIOLOGY SOC	BIOTECHNOLOGY \& APPLIED MICROBIOLOGY; VIROLOGY	PIASECKI, TOMASZ/B-1019-2017	NA	37	EXTENSIVE RECOMBINATION DETECTED AMONG BEAK AND FEATHER DISEASE VIRUS ISOLATES FROM BREEDING FACILITIES IN POLAND	ARTICLE	0	24	94	BIOTECHNOLOGY \& APPLIED MICROBIOLOGY; VIROLOGY
ISI000319337100016	rejected off topic parrots	Ada Sanchez	BEJARANO S, 2013, MAR ECOL -PROG SER	BEJARANO S;GOLBUU Y;SAPOLU T;MUMBY PJ	CATCH-PER-UNIT EFFORT; FISH MARKET SURVEYS; GRAZING; MICRONESIA;; SPEARFISHING	GREAT-BARRIER-REEF; CORAL-REEFS; ECOSYSTEM FUNCTION; FUNCTIONAL ROLES;; MARINE RESERVES; PHASE-SHIFTS; RESILIENCE; MANAGEMENT; PARROTFISHES;; FISHERIES	BEJARANO, S (CORRESPONDING AUTHOR), LITTLE CAYMAN RES CTR, CENT CARIBBEAN MARINE INST, NORTH COAST RD,POB 37,LITTLE CAYMAN KY3-2501, CAYMAN ISLANDS, JAMAICA.; BEJARANO, SONIA; SAPOLU, TEBAUA; MUMBY, PETER J., UNIV QUEENSLAND, SCH BIOL SCI, MARINE SPATIAL ECOL LAB, BRISBANE, QLD 4072, AUSTRALIA.; GOLBUU, YIMNANG, PALAU INT CORAL REEF CTR, KOROR 96940, PALAU.	NOMINALLY HERBIVOROUS FISH PLAY A VARIETY OF FUNCTIONAL ROLES THAT ARE IMPORTANT IN MAINTAINING CORAL REEF RESILIENCE, YET ARE MAJOR TARGETS OF SPEAR FISHERIES IN MICRONESIA. ALTHOUGH PROTECTION IS AFFORDED TO ICONIC SPECIES IN SOME AREAS, IMPACTS OF THE FISHERY ON THE ECOSYSTEM ARE POORLY UNDERSTOOD. THE GOAL OF THIS STUDY WAS TO LOCATE THE MAJOR POTENTIAL ECOLOGICAL THREATS FROM THE FISHERY BY …	NORDBUNTE 23, D-21385 OLDENDORF LUHE, GERMANY	NA	SBEJARANO@REEFRESEARCH.ORG	NA	NA	NA	2020-10-23	149QV	10.3354/meps10270	NA	NA	1616-1599	NA	NA	NATIONAL FISH AND WILDLIFE FOUNDATION; KHALED BIN SULTAN LIVING OCEANS FOUNDATION	THIS WORK WAS FUNDED BY THE NATIONAL FISH AND WILDLIFE FOUNDATION, AND THE KHALED BIN SULTAN LIVING OCEANS FOUNDATION. THE AUTHORS THANK THE PALAU INTERNATIONAL CORAL REEF CENTRE (PICRC), THE KOROR STATE DEPARTMENT OF CONSERVATION AND LAW ENFORCEMENT, THE STAFF OF THE FISH MARKETS, A. MARSHELL, M. PRIEST IN THE MARINE LABORATORY IN THE UNIVERSITY OF GUAM, THE CONSERVATION SOCIETY OF POHNPEI (CSP)…	NA	0171-8630	MAR. ECOL.-PROG. SER.	MARINE ECOLOGY PROGRESS SERIES	ENGLISH	NA	NA	NA	87	NA	NA	MUMBY, PETER/0000-0002-6297-9053 BEJARANO, SONIA/0000-0001-6451-6354 BEJARANO, SONIA/0000-0001-6451-6354	NA	197	INTER-RESEARCH	ENVIRONMENTAL SCIENCES \& ECOLOGY; MARINE \& FRESHWATER BIOLOGY; OCEANOGRAPHY	MUMBY, PETER/F-9914-2010 BEJARANO, SONIA/S-7784-2016 BEJARANO, SONIA/S-3770-2019	NA	34	ECOLOGICAL RISK AND THE EXPLOITATION OF HERBIVOROUS REEF FISH ACROSS MICRONESIA	ARTICLE	2	52	482	ECOLOGY; MARINE \& FRESHWATER BIOLOGY; OCEANOGRAPHY
ISI000319805400001	included in review	Ada Sanchez	BOSERET G, 2013, VET RES	BOSERET G;LOSSON B;MAINIL E;SAEGERMAN C	NA	POULTRY RED MITE; MYCOBACTERIUM-TUBERCULOSIS INFECTION;; DERMANYSSUS-GALLINAE; CAMPYLOBACTER-JEJUNI; EUROPEAN STARLINGS;; ESCHERICHIA-COLI; AVIAN INFLUENZA; USUTU-VIRUS;; ERYSIPELOTHRIX-RHUSIOPATHIAE; NEWCASTLE-DISEASE	SAEGERMAN, C (CORRESPONDING AUTHOR), UNIV LIEGE, FAC VET MED, DEPT INFECT \& PARASIT DIS, EPIDEMIOL \& RISK ANAL APPL VET SCI UREAR ULG, B-4000 LIEGE, BELGIUM.; BOSERET, GERALDINE; SAEGERMAN, CLAUDE, UNIV LIEGE, FAC VET MED, DEPT INFECT \& PARASIT DIS, EPIDEMIOL \& RISK ANAL APPL VET SCI UREAR ULG, B-4000 LIEGE, BELGIUM.; LOSSON, BERTRAND; MAINIL, JACQUES G.; THIRY, ETIENNE, UNIV LIEGE, FAC VET M…	PET BIRDS ARE A NOT-SO-WELL KNOWN VETERINARIAN'S CLIENTSHIP FRACTION. BOUGHT INDIVIDUALLY OR IN COUPLES, AS FAMILIES OFTEN DO (WHICH IS A LUCRATIVE BUSINESS FOR PET SHOPS OR LOCAL BREEDERS) OR TRADED (SOMETIMES ILLEGALLY) FOR THEIR VERY HIGH GENETIC OR EXOTIC VALUE, THESE BIRDS, COMMONLY CANARIES, PARAKEETS OR PARROTS, ARE REGULARLY SOLD AT HIGH PRICES. THESE ANIMALS, HOWEVER, ARE POTENTIAL CARRI…	CAMPUS, 4 CRINAN ST, LONDON N1 9XW, ENGLAND	36	CLAUDE.SAEGERMAN@ULG.AC.BE	NA	NA	NA	2020-10-23	156EV	10.1186/1297-9716-44-36	NA	NA	1297-9716	NA	NA	NA	NA	NA	0928-4249	VET. RES.	VETERINARY RESEARCH	ENGLISH	NA	MAY 20	NA	118	NA	DOAJ GOLD, GREEN PUBLISHED	NA	NA	NA	BMC	VETERINARY SCIENCES	NA	NA	30	ZOONOSES IN PET BIRDS: REVIEW AND PERSPECTIVES	REVIEW	1	76	44	VETERINARY SCIENCES
ISI000320004300005	rejected off topic illegal trade	Ada Sanchez	VALLEJOS MAV, 2013, IHERINGIA SER ZOOL	VALLEJOS MAV;BELMONTE-LOPES R;KLEMANN-JUNIOR L;BORNSCHEIN MR;DECONTO LR;CARRANO E;GUSSONI COA	BROWN-BACKED PARROTLET; LOWLAND FORESTS; PARANA COAST; VOCALIZATION	NA	VALLEJOS, MAV (CORRESPONDING AUTHOR), HORI CONSULTORIA AMBIENTAL, RUA CEL TEMISTOCLES DE SOUZA BRASIL 311, BR-82520210 CURITIBA, PARANA, BRAZIL.; VALLEJOS, MARCELO A. V.; DECONTO, LEONARDO R., HORI CONSULTORIA AMBIENTAL, BR-82520210 CURITIBA, PARANA, BRAZIL.; BELMONTE-LOPES, RICARDO; BORNSCHEIN, MARCOS R., UNIV FED PARANA, DEPT ZOOL, LAB DINAM EVOLUT \& SISTEMAS COMPLEXOS, CTR POLITECN, BR-815319…	THE BROWN-BACKED PARROTLET [TOUIT MELANONOTUS (WIED, 1820)] IS A RARE FOREST SPECIES RESTRICTED TO THE BRAZILIAN ATLANTIC FOREST, AND IS INCLUDED IN THE ENDANGERED CATEGORY FOR SPECIES THREATENED OF EXTINCTION. AS THERE IS A LACK OF KNOWLEDGE ABOUT THE SPECIES' NATURAL HISTORY AND OCCURRENCE, NEW OBSERVATIONS CAN PROVIDE HELPFUL INFORMATION FOR PARROTLET CONSERVATION. HERE WE REEVALUATE THE FIRST…	CAIXA POSTAL 1188, PORTO ALEGRE, RS 00000, BRAZIL	NA	MARCELO@HORI.BIO.BR	NA	NA	NA	2020-10-23	158WJ	10.1590/S0073-47212013000100005	NA	NA	NA	NA	NA	NA	NA	NA	0073-4721	IHERINGIA SER. ZOOL.	IHERINGIA SERIE ZOOLOGIA	PORTUGUESE	NA	MAR 31	NA	22	1	DOAJ GOLD, GREEN PUBLISHED	VILLEGAS, MARCELO/0000-0002-0275-1719 BORNSCHEIN, MARCOS R./0000-0002-6486-7055 BELMONTE-LOPES, RICARDO/0000-0002-3122-0271	NA	37-41	FUNDACAO ZOOBOTANICA RIO GRANDE SUL, MUSEU CIENCIAS NATURAIS	ZOOLOGY	VILLEGAS, MARCELO/Z-1438-2019 BORNSCHEIN, MARCOS R./A-1303-2013	NA	0	OCCURRENCE AND CONSERVATION OF TOUIT MELANONOTUS (AVES, PSITTACIDAE) IN SOUTHERN BRAZIL	ARTICLE	0	8	103	ZOOLOGY
ISI000320752200002	rejected off topic illegal trade	Ada Sanchez	MORI E, 2013, ITAL J ZOOLOG	MORI E;DI FEBBRARO M;FORESTA M;MELIS E;NOTARI A;BOGGIANO F	PET TRADE; PSITTACIFORMES; INVASION DETECTION; DISTRIBUTION RANGE	PSITTACULA-KRAMERI; MONK PARAKEET; POPULATIONS; TRANSPORT; IMPACT;; SPREAD	MORI, E (CORRESPONDING AUTHOR), UNIV SIENA, DIPARTIMENTO SCI AMBIENTALI G SARFATTI, VIA PA MATTIOLI 4, I-53100 SIENA, ITALY.; MORI, E., UNIV SIENA, DIPARTIMENTO SCI AMBIENTALI G SARFATTI, I-53100 SIENA, ITALY.; DI FEBBRARO, M.; FORESTA, M., UNIV MOLISE, DIPARTIMENTO BIOSCI \& TERR, PESCHE, ISERNIA, ITALY.; MELIS, P., UNIV SASSARI, DIPARTIMENTO ZOOL \& GENET EVOLUZIONIST, I-07100 SASSARI, ITALY.; …	PARROT SPECIES ARE OFTEN INTRODUCED OUTSIDE OF THEIR NATIVE DISTRIBUTION RANGE, AS THEY ARE AMONG THE MOST POPULAR PETS WORLDWIDE. RELEASES, AND PARTICULARLY UNPLANNED ESCAPES, HAVE RESULTED IN THE ESTABLISHMENT OF MANY NATURALISED POPULATIONS IN EUROPE, INCLUDING ITALY. MANY PARROT SPECIES PRESENT WIDE ECOLOGICAL TOLERANCE AND HIGH SYNANTHROPY, BUT THE KNOWLEDGE OF THEIR DISTRIBUTION IN THE AREA…	2-4 PARK SQUARE, MILTON PARK, ABINGDON OR14 4RN, OXON, ENGLAND	NA	MORIEMILIANO@TISCALI.IT	NA	NA	NA	2020-10-23	169BP	10.1080/11250003.2012.738713	NA	NA	1748-5851	NA	NA	NA	NA	NA	1125-0003	ITAL. J. ZOOLOG.	ITALIAN JOURNAL OF ZOOLOGY	ENGLISH	NA	JUN 1	NA	100	2	GREEN PUBLISHED, BRONZE	DI FEBBRARO, MIRKO/0000-0001-8898-7046	NA	158-167	TAYLOR \& FRANCIS LTD	ZOOLOGY	MELIS, PAOLO/AAI-6596-2020 DI FEBBRARO, MIRKO/I-3167-2019	NA	18	ASSESSMENT OF THE CURRENT DISTRIBUTION OF FREE-LIVING PARROTS AND PARAKEETS (AVES: PSITTACIFORMES) IN ITALY: A SYNTHESIS OF PUBLISHED DATA AND NEW RECORDS	ARTICLE	0	36	80	ZOOLOGY
ISI000321532800019	included in review	Ada Sanchez	BOSNJAK J, 2013, PAK J ZOOL	BOSNJAK J;STEVANOV-PAVLOVIC M;VUCICEVIC J;SIMEUNOVIC P;RESANOVIC Z	PSITTACIFORMES; CONSERVATION; MOLECULAR SEXING; CHD GENE; 2550F/2718R	GENOMIC DNA; IDENTIFICATION; BLOOD; BIRDS; RATIOS; WILD; PCR;; POPULATION; SURVIVAL; FEATHERS	BOSNJAK, J (CORRESPONDING AUTHOR), UNIV BELGRADE, DEPT BIOL, FAC VET MED, BLVD OSLOBODJENJA 18, BELGRADE 11000, SERBIA.; BOSNJAK, JASNA; STEVANOV-PAVLOVIC, MARIJA; STEVANOVIC, JEVROSIMA; SIMEUNOVIC, PREDRAG; STANIMIROVIC, ZORAN, UNIV BELGRADE, DEPT BIOL, FAC VET MED, BELGRADE 11000, SERBIA.; VUCICEVIC, MILOS; RESANOVIC, RADMILA, UNIV BELGRADE, DEPT EQUINE SMALL ANIM POULTRY \& WILD ANIM DIS, FAC …	THE AIM OF THIS STUDY WAS TO TEST THE FEASIBILITY AND EFFICACY OF A NON-INVASIVE MOLECULAR METHOD FOR GENDER IDENTIFICATION OF PARROTS, USING DIFFERENT TYPES OF SAMPLES AND THE CHROMO HELICASE DNA-BINDING (CHD) GENE AS A MOLECULAR MARKER. DNA WAS ISOLATED PRIMARILY FROM FEATHERS AND THE AMPLIFICATION OF THE CHD GENE WAS PERFORMED USING 2550F/2718R PRIMERS. IN ORDER TO. COMPARE THE RELIABILITY OF …	UNIV PUNJAB, NEW CAMPUS, C/O DEPT ZOOLOGY, LAHORE, PAKISTAN	NA	BOSNJAKJASN@GMAIL.COM	NA	NA	NA	2020-10-23	179PC	NA	NA	NA	NA	NA	NA	MINISTRY OF EDUCATION AND SCIENCE OF SERBIA [III46002]	THIS STUDY WAS SUPPORTED BY THE MINISTRY OF EDUCATION AND SCIENCE OF SERBIA, GRANT NO. III46002. WE DECLARE THAT THE EXPERIMENT COMPLY WITH THE CURRENT LAWS OF SERBIA, WHERE IT WAS PERFORMED.	NA	0030-9923	PAK. J. ZOOL.	PAKISTAN JOURNAL OF ZOOLOGY	ENGLISH	NA	JUN	NA	43	3	NA	VUCICEVIC, MILOS/0000-0002-3208-147X STEVANOVIC, JEVROSIMA/0000-0003-0906-5911 STANIMIROVIC, ZORAN/0000-0003-2657-8591	NA	715-720	ZOOLOGICAL SOC PAKISTAN	ZOOLOGY	NA	NA	9	FEASIBILITY OF NON-INVASIVE MOLECULAR METHOD FOR SEXING OF PARROTS	ARTICLE	0	23	45	ZOOLOGY
ISI000322874900023	rejected off topic illegal trade	Ada Sanchez	SASSA Y, 2013, VIRUS GENES	SASSA Y;HORIE M;FUJINO K;NISHIURA N;OKAZAKI S;FURUYA T;NAGAI M;OMATSU T;KOJIMA A;MIZUGAMI M;UEDA H;EBISAWA K;TOMONAGA K;MIZUTANI T	AVIAN BORNAVIRUS; PDD; FEATHER PICKING DISEASE; PET BIRDS; NEUROLOGICAL; DISORDER	PROVENTRICULAR DILATATION DISEASE; PSITTACINE BIRDS; RNA	MIZUTANI, T (CORRESPONDING AUTHOR), TOKYO UNIV AGR \& TECHNOL, RES \& EDUC CTR PREVENT GLOBAL INFECT DIS ANIM, 3-5-8 SAIWAI CHO, FUCHU, TOKYO 1838509, JAPAN.; SASSA, YUKIKO; NISHIURA, NAOMI; OKAZAKI, SACHIKO; NAGAI, MAKOTO; OMATSU, TSUTOMU; MIZUTANI, TETSUYA, TOKYO UNIV AGR \& TECHNOL, RES \& EDUC CTR PREVENT GLOBAL INFECT DIS ANIM, FUCHU, TOKYO 1838509, JAPAN.; HORIE, MASAYUKI; FUJINO, KAN; TOMO…	RECENTLY, AVIAN BORNAVIRUS (ABV) WAS DETECTED IN PROVENTRICULAR DILATATION DISEASE (PDD) AFFECTED-BIRDS AND FEATHER PICKING DISEASES AFFECTED-BIRDS. HOWEVER, THE PATHOGENICITY OF ABV HAS NOT BEEN THOROUGHLY INVESTIGATED. IN THIS STUDY, WE SURVEYED ABV IN PET BIRDS IN JAPAN. WE FOUND FOUR ABV-INFECTED BIRDS AMONG 93 PET BIRDS USING RT-PCR, AND GENOTYPES OF THE ABV WERE DETERMINED AS ABV-2 AND -4. …	VAN GODEWIJCKSTRAAT 30, 3311 GZ DORDRECHT, NETHERLANDS	NA	TMIZUTAN@CC.TUAT.AC.JP	NA	NA	NA	2020-10-23	197TU	10.1007/s11262-013-0913-3	NA	NA	NA	NA	NA	MINISTRY OF HEALTH, LABOR AND WELFARE OF JAPANMINISTRY OF HEALTH, LABOUR AND WELFARE, JAPAN [H22-SHINKOU-IPPAN-006]	WE ARE GRATEFUL TO THE STAFF AT THE RESEARCH AND EDUCATION CENTER FOR PREVENTION OF GLOBAL INFECTIOUS DISEASES OF ANIMALS, TOKYO UNIVERSITY OF AGRICULTURE AND TECHNOLOGY. THIS STUDY WAS SUPPORTED IN PART BY A GRANT-IN-AID FROM THE MINISTRY OF HEALTH, LABOR AND WELFARE OF JAPAN (GRANTS H22-SHINKOU-IPPAN-006).	NA	0920-8569	VIRUS GENES	VIRUS GENES	ENGLISH	NA	AUG	NA	8	1	NA	OMATSU, TSUTOMU/0000-0001-7860-7409 FURUYA, TETSUYA/0000-0003-3979-7072 MIZUTANI, TETSUYA/0000-0003-2570-0452 HORIE, MASAYUKI/0000-0003-4682-7698	NA	173-177	SPRINGER	GENETICS \& HEREDITY; VIROLOGY	OMATSU, TSUTOMU/C-8344-2013 NAGAI, MAKOTO/C-2363-2013 SASSA, YUKIKO/H-6585-2013 FURUYA, TETSUYA/J-5916-2013 MIZUTANI, TETSUYA/G-1086-2013	NA	8	MOLECULAR EPIDEMIOLOGY OF AVIAN BORNAVIRUS FROM PET BIRDS IN JAPAN	ARTICLE	1	23	47	GENETICS \& HEREDITY; VIROLOGY
ISI000323101700015	rejected illegal trade circunstancial	Ada Sanchez	ESPANOLA CP, 2013, ANIM CONSERV	ESPANOLA CP;COLLAR NJ;MARSDEN SJ	AVIAN FRUGIVORE; HORNBILL; MINIMUM VIABLE POPULATION; PARROT;; PHILIPPINES; PIGEON; POPULATION ESTIMATE; PROTECTED AREA	TROPICAL RAIN-FOREST; SEED DISPERSAL; HABITAT DISTURBANCE; BIRD; ABUNDANCE; LAND-USE; DENSITIES; PARROTS; IMPACT; SIZE; DEFORESTATION	ESPANOLA, CP (CORRESPONDING AUTHOR), MANCHESTER METROPOLITAN UNIV, SCH SCI \& ENVIRONM, DIV BIOL \& CONSERVAT ECOL, CHESTER ST, MANCHESTER M1 5GD, LANCS, ENGLAND.; ESPANOLA, C. P.; MARSDEN, S. J., MANCHESTER METROPOLITAN UNIV, SCH SCI \& ENVIRONM, DIV BIOL \& CONSERVAT ECOL, MANCHESTER M1 5GD, LANCS, ENGLAND.; ESPANOLA, C. P., UNIV PHILIPPINES DILIMAN, COLL SCI, INST BIOL, QUEZON CITY, PHILIPPINE…	AVIAN FRUGIVORES ACROSS SOUTHEAST ASIA, AND IN THE PHILIPPINES IN PARTICULAR, ARE SERIOUSLY THREATENED OWING TO MASSIVE LOSS OF HABITAT AND DIRECT EXPLOITATION THROUGH HUNTING AND THE PET TRADE. THEIR DECLINES MAY HAVE DIRE CONSEQUENCES FOR WIDER ECOLOGICAL PROCESSES AS MANY FRUGIVORES ARE ALSO SEED DISPERSERS. TWENTY-FIVE SPECIES OF PIGEONS, PARROTS AND HORNBILLS WERE SURVEYED USING DISTANCE SAM…	111 RIVER ST, HOBOKEN 07030-5774, NJ USA	NA	CARMELA.ESPANOLA@STU.MMU.AC.UK	NA	NA	NA	2020-10-23	200WL	10.1111/acv.12018	NA	NA	1469-1795	NA	NA	LORO PARQUE FUNDACION	WE THANK LORO PARQUE FUNDACION FOR FUNDING THE PHD PROGRAMME OF WHICH THIS FORMS A PART, AND THE PROTECTED AREAS AND WILDLIFE BUREAU OF THE DEPARTMENT OF ENVIRONMENT AND NATURAL RESOURCES FOR PERMITS AND LOGISTICAL SUPPORT. C. P. E. THANKS NIKKI DYANNE REALUBIT AND JONI ACAY FOR HELP WITH DATA COLLECTION, AND ARNEL TELESFORO, ULYSSES FERRERAS, MARK JASON VILLA, EDUARDO SALONGA, JOEL RESTUM, BOBBY…	NA	1367-9430	ANIM. CONSERV.	ANIMAL CONSERVATION	ENGLISH	NA	AUG	NA	69	4	NA	NA	NA	467-479	WILEY	BIODIVERSITY \& CONSERVATION; ENVIRONMENTAL SCIENCES \& ECOLOGY	NA	NA	7	ARE POPULATIONS OF LARGE-BODIED AVIAN FRUGIVORES ON LUZON, PHILIPPINES, FACING IMMINENT COLLAPSE?	ARTICLE	1	36	16	BIODIVERSITY CONSERVATION; ECOLOGY
ISI000323350900021	included in review	JRFP	CARRASCAL J, 2013, REV MVZ CORDOBA	CARRASCAL J;CHACON P J;OCHOA C V	BROTOGERIS JUGULARIS; COLOMBIA; FAUNA; PSITTACIDAE	NA	CARRASCAL, J (CORRESPONDING AUTHOR), UNIV CORDOBA, FAC MED VET \& ZOOTECNIA, DEPT CIENCIAS PECUARIAS MONTERIA, E-14071 CORDOBA, SPAIN.; CARRASCAL, JUAN, V, UNIV CORDOBA, FAC MED VET \& ZOOTECNIA, DEPT CIENCIAS PECUARIAS MONTERIA, E-14071 CORDOBA, SPAIN.; CHACON P, JULIO, UNIV CORDOBA, FAC CIENCIAS BASICAS \& INGN, E-14071 CORDOBA, SPAIN.	OBJETIVE. THE ENTRANCE DYNAMICS OF FAMILY PSITTACIDAE TO THE WILDLIFE ATTENTION AND VALUATION CENTER (CAV - CVS) WAS DETERMINED. MATERIALS AND METHODS. DATA WERE OBTAINED BETWEEN 2007 TO 2009. A FREQUENCY ANALYSIS FOR THE VARIABLES SPECIES, ENTRANCE TYPE AND TIME (MONTHS AND YEARS) WAS IMPLEMENTED. FOR THE VARIABLE MONTHS AN ANALYSIS OF MEAN DIFFERENCE WAS APPLIED AND THE RELATIONSHIP ENTRANCE OF…	FAC MEDICINA VETERINARIA Y ZOOTECNIA, KM 26, VIA CIENEGA DE ORO, APARTADO AEREO NO 354, MONTERIA, 00000, COLOMBIA	NA	JCVELASQUE@YAHOO.COM	NA	NA	NA	2020-10-23	204FQ	NA	NA	NA	NA	NA	NA	NA	NA	NA	0122-0268	REV. MVZ CORDOBA	REVISTA MVZ CORDOBA	SPANISH	NA	JAN-APR	NA	20	1	DOAJ GOLD	NA	NA	3414-3419	UNIV CORDOBA	AGRICULTURE	NA	NA	0	ENTRANCE OF PARROTS TO THE CENTER OF ATTENTION OF WILDLIFE (CAV-CVS), DURING THE YEARS 2007-2009	ARTICLE	0	2	18	AGRICULTURE, DAIRY \& ANIMAL SCIENCE
ISI000323360900004	rejected off topic illegal trade	JRFP	XU N, 2013, ANTHROZOOS	XU N;BURNHAM D;KITAMURA C;VOLLMER-CONNA U	INFANT-DIRECTED SPEECH; PET-DIRECTED SPEECH; SPEECH REGISTERS; VOWEL; HYPERARTICULATION	COMMUNICATIVE INTENT; MOTHERS SPEECH; PITCH; TALK; SEX; AGE	XU, N (CORRESPONDING AUTHOR), MACQUARIE UNIV, DEPT LINGUIST, AUSTRALIAN HEARING HUB, LEVEL 3 NORTH,ROOM 3-525,BALACLAVA RD, N RYDE, NSW 2109, AUSTRALIA.; XU, NAN, MACQUARIE UNIV, DEPT LINGUIST, ARC CTR EXCELLENCE COGNIT \& ITS DISORDERS, N RYDE, NSW 2109, AUSTRALIA.; BURNHAM, DENIS; KITAMURA, CHRISTINE, UNIV WESTERN SYDNEY, MARCS INST, PENRITH, NSW 1797, AUSTRALIA.; VOLLMER-CONNA, UTE, UNIV NEW S…	VOWEL TRIANGLE AREA IS A PHONETIC MEASURE OF THE CLARITY OF VOWEL ARTICULATION. COMPARED WITH SPEECH TO ADULTS, PEOPLE HYPERARTICULATE VOWELS IN SPEECH TO INFANTS AND FOREIGNERS BUT NOT TO PETS, DESPITE OTHER SIMILARITIES IN INFANT- AND PET-DIRECTED-SPEECH. THIS SUGGESTS THAT VOWEL HYPERARTICULATION HAS A DIDACTIC FUNCTION POSITIVELY RELATED TO THE ACTUAL, OR EVEN THE EXPECTED, DEGREE OF LINGUIST…	2-4 PARK SQUARE, MILTON PARK, ABINGDON OX14 4RN, OXON, ENGLAND	NA	NAN.XU@MQ.EDU.AU	NA	NA	NA	2020-10-23	204JF	10.2752/175303713X13697429463592	NA	NA	1753-0377	NA	NA	NA	NA	NA	0892-7936	ANTHROZOOS	ANTHROZOOS	ENGLISH	NA	SEP	NA	23	3	NA	RATTANASONE, NAN XU/0000-0002-2916-8435 BURNHAM, DENIS/0000-0002-1980-3458	NA	373-380	ROUTLEDGE JOURNALS, TAYLOR \& FRANCIS LTD	ANTHROPOLOGY; ENVIRONMENTAL SCIENCES \& ECOLOGY; SOCIOLOGY; VETERINARY SCIENCES	RATTANASONE, NAN XU/Q-9812-2019	NA	17	VOWEL HYPERARTICULATION IN PARROT-, DOG- AND INFANT-DIRECTED SPEECH	ARTICLE	1	283	26	ANTHROPOLOGY; ENVIRONMENTAL STUDIES; SOCIOLOGY; VETERINARY SCIENCES
ISI000323589700034	rejected off topic illegal trade	Ada Sanchez	COSTA T, 2013, J COMP PATHOL	COSTA T;GRIFOLS J;PERPINAN D	AFRICAN GREY PARROT; ENDOGENOUS LIPID PNEUMONIA; LUNG; PSITTACINE	ALVEOLAR HISTIOCYTOSIS	COSTA, T (CORRESPONDING AUTHOR), UNIV AUTONOMA BARCELONA, DEPT SANITAT \& ANAT ANIM, BELLATERRA 08193, SPAIN.; COSTA, T., UNIV AUTONOMA BARCELONA, DEPT SANITAT \& ANAT ANIM, BELLATERRA 08193, SPAIN.; GRIFOLS, J.; PERPINAN, D., ZOOL BADALONA VET, BARCELONA 08912, SPAIN.	LIPID PNEUMONIA IS AN UNUSUAL, NON-INFECTIOUS, INFLAMMATORY LUNG DISEASE CHARACTERIZED BY PATCHY PNEUMONIC CONSOLIDATION SECONDARY TO ACCUMULATION OF LIPID IN MACROPHAGES. IT CAN BE CLASSIFIED AS EXOGENOUS OR ENDOGENOUS, DEPENDING ON WHETHER IT IS ASSOCIATED WITH THE ASPIRATION OF FOREIGN MATERIAL. ENDOGENOUS LIPID PNEUMONIA (ENLP) HAS BEEN REPORTED IN MANY MAMMAL SPECIES. IN PET BIRDS, ENLP IS A…	THE BOULEVARD, LANGFORD LANE, KIDLINGTON, OXFORD OX5 1GB, OXON, ENGLAND	NA	TAI.PCOSTA@GMAIL.COM	NA	NA	NA	2020-10-23	207HO	10.1016/j.jcpa.2013.01.008	NA	NA	1532-3129	NA	NA	NA	NA	NA	0021-9975	J. COMP. PATHOL.	JOURNAL OF COMPARATIVE PATHOLOGY	ENGLISH	NA	AUG-OCT	NA	23	23	NA	NA	NA	381-384	ELSEVIER SCI LTD	PATHOLOGY; VETERINARY SCIENCES	NA	NA	3	ENDOGENOUS LIPID PNEUMONIA IN AN AFRICAN GREY PARROT (PSITTACUS ERITHACUS ERITHACUS)	ARTICLE	0	15	149	PATHOLOGY; VETERINARY SCIENCES
ISI000323622600004	rejected illegal trade circunstancial	Ada Sanchez	CLARKE RV, 2013, J EXP CRIMINOL	CLARKE RV;DE BY RA	PARROT POACHING; MATCHED CASE-CONTROLS; SPATIAL ANALYSIS; CONSERVATION;; ENDANGERED SPECIES	TRADE; CONSERVATION; CRIME; NEST	CLARKE, RV (CORRESPONDING AUTHOR), RUTGERS STATE UNIV, SCH CRIMINAL JUSTICE, NEWARK, NJ 07102 USA.; CLARKE, RONALD V., RUTGERS STATE UNIV, SCH CRIMINAL JUSTICE, NEWARK, NJ 07102 USA.; DE BY, ROLF A., UNIV TWENTE, FAC GEOINFORMAT SCI \& EARTH OBSERVAT ITC, DEPT GEOINFORMAT PROC, NL-7500 AE ENSCHEDE, NETHERLANDS.	TO EVALUATE THE RELATIVE CONTRIBUTIONS OF POACHING AND HABITAT LOSS TO THE ENDANGERMENT OF NEOTROPICAL PARROTS A MATCHED CASE-CONTROL DESIGN WAS EMPLOYED. USING NATURESERVE DIGITIZED RANGE MAPS FOR BIRDS IN THE AMERICAS, 145 NEOTROPICAL PARROT SPECIES WERE INDIVIDUALLY MATCHED WITH 145 CONTROL SPECIES, FROM SIMILAR RANGES AND, BY PROXY, FROM SIMILAR HABITATS. THE CONTROL SPECIES WERE TAXONOMICALL…	VAN GODEWIJCKSTRAAT 30, 3311 GZ DORDRECHT, NETHERLANDS	NA	RVGCLARKE@AOL.COM R.A.DEBY@UTWENTE.NL	NA	NA	NA	2020-10-23	207RX	10.1007/s11292-013-9177-0	NA	NA	1572-8315	NA	NA	NA	NA	NA	1573-3750	J. EXP. CRIMINOL.	JOURNAL OF EXPERIMENTAL CRIMINOLOGY	ENGLISH	NA	SEP	NA	46	3	NA	DE BY, ROLF A./0000-0002-8921-2960	NA	333-353	SPRINGER	CRIMINOLOGY \& PENOLOGY	DE BY, ROLF/K-5200-2013 DE BY, ROLF A./N-3254-2019	NA	25	POACHING, HABITAT LOSS AND THE DECLINE OF NEOTROPICAL PARROTS: A COMPARATIVE SPATIAL ANALYSIS	ARTICLE	0	47	9	CRIMINOLOGY \& PENOLOGY
ISI000326204300004	rejected off topic illegal trade	Ada Sanchez	VORBRUEGGEN S, 2013, TIERARZTL PRAX AUSG KLEINTIERE HEIMTIERE	VORBRUEGGEN S;BAILEY T;KRAUTWALD-JUNGHANNS ME	FALCONIDAE; RADIOGRAPHIC EXAMINATION; LUNGS; AIR SACS	ANATOMY	VORBRUGGEN, S (CORRESPONDING AUTHOR), UNIV LEIPZIG, KLIN VOGEL \& REPTILIEN, TIERKLINIKEN 17, D-04103 LEIPZIG, GERMANY.; VORBRUEGGEN, S.; KRAUTWALD-JUNGHANNS, M. -E., UNIV LEIPZIG, KLIN VOGEL \& REPTILIEN, D-04103 LEIPZIG, GERMANY.; BAILEY, T., INT WILDLIFE CONSULTANTS, AVICULTURE \& HLTH, CARMARTHEN, DYFED, WALES.	OBJECTIVE: SUMMARY OF TYPICAL RADIOGRAPHIC SIGNS IN BIRDS OF PREY WITH ASPERGILLOSIS COMPARED TO SIGNS PREVIOUSLY ESTABLISHED IN PARROTS. MATERIALS AND METHODS: EVALUATION OF RADIOGRAPHS OF 110 FALCONS (FALCO SPP.) WITH ASPERGILLOSIS CONFIRMED BY ENDOSCOPY. RESULTS: COMPARED TO PARROTS PRIMARILY SUBTLE RADIOGRAPHIC SIGNS WERE DETECTED IN FALCONS (ESPECIALLY INHOMOGENEOUSLY INCREASED RADIODENSITIE…	HOLDERLINSTRASSE 3, D-70174 STUTTGART, GERMANY	NA	VORBRUEGGEN@VOGELKLINIK.UNI-LEIPZIG.DE	NA	NA	NA	2020-10-23	241YJ	NA	NA	NA	NA	NA	NA	NA	NA	NA	1434-1239	TIERARZTL. PRAX. AUSG. KLEINTIERE HEIMTIERE	TIERAERZTLICHE PRAXIS AUSGABE KLEINTIERE HEIMTIERE	GERMAN	NA	NA	NA	18	5	NA	NA	NA	311-318	SCHATTAUER GMBH-VERLAG MEDIZIN NATURWISSENSCHAFTEN	VETERINARY SCIENCES	NA	NA	3	RADIOGRAPHIC FINDINGS IN RAPTORS AFFECTED WITH A MYCOSIS OF THE RESPIRATORY TRACT	ARTICLE	1	6	41	VETERINARY SCIENCES
ISI000326765400003	rejected off topic illegal trade	Ada Sanchez	LE SOUEF AT, 2013, J AVIAN MED SURG	LE SOUEF AT;HOLYOAKE CS;VITALI KS	HERNATOLOGY; PLASMA BIOCHEMISTRY; BLACK COCKATOOS; AVIAN; CARNABY'S; COCKATOO; CALYPTORHYNCHUS LATIROSTRIS; BAUDIN'S COCKATOO;; CALYPTORHYNCHUS BAUDINII; FOREST RED-TAILED BLACK COCKATOO;; CALYPTORHYNCHUS BANKSII NASO	CHEMISTRY VALUES; PELECANUS-OCCIDENTALIS; CLINICAL-CHEMISTRY;; PARAMETERS; PARASITES; BIRDS; AGE	LE SOUEF, AT (CORRESPONDING AUTHOR), MURDOCH UNIV, SCH VET \& BIOMED SCI, CONSERVAT MED PROGRAM, SOUTH ST, MURDOCH, WA 6150, AUSTRALIA.; LE SOUEF, ANNA T.; HOLYOAKE, CARLY S.; WARREN, KRISTIN S., MURDOCH UNIV, SCH VET \& BIOMED SCI, CONSERVAT MED PROGRAM, MURDOCH, WA 6150, AUSTRALIA.; VITALI, SIMONE D., PERTH ZOO, VET DEPT, S PERTH, WA 6151, AUSTRALIA.	BLACK COCKATOOS IN SOUTHWEST WESTERN AUSTRALIA FACE POPULATION DECLINES AS A RESULT OF HABITAT LOSS AND FRAGMENTATION, POACHING, COMPETITION WITH OTHER SPECIES, VEHICLE STRIKES, AND SHOOTINGS. IN THIS STUDY, HEMATOLOGIC AND PLASMA BIOCHEMICAL REFERENCE VALUES WERE DETERMINED FOR 3 ENDEMIC WESTERN AUSTRALIAN BLACK COCKATOO SPECIES: CARNABY'S COCKATOO (CALYPTORHYNCHUS LATIROSTRIS) (N = 34), BAUDIN'…	PO BOX 811720, BOCA RATON, FL 33481 USA	NA	NA	NA	NA	NA	2020-10-23	249GJ	10.1647/2010-056.1	NA	NA	1938-2871	NA	NA	PERTH ZOO; MURDOCH UNIVERSITY	THIS RESEARCH WAS FUNDED BY PERTH ZOO AND MURDOCH UNIVERSITY. WE THANK R. DAWSON AND THE WESTERN AUSTRALIAN DEPARTMENT OF ENVIRONMENT AND CONSERVATION FOR ASSISTANCE IN THE CAPTURE AND RESTRAINT OF COCKATOOS FOR SAMPLING, AND TO THE KAARAKIN BLACK COCKATOO REHABILITATION CENTRE FOR THEIR COOPERATION.	NA	1082-6742	J. AVIAN MED. SURG.	JOURNAL OF AVIAN MEDICINE AND SURGERY	ENGLISH	NA	MAR	NA	38	1	NA	WARREN, KRISTIN/0000-0002-9328-2013	NA	14-22	ASSOC AVIAN VETERINARIANS	VETERINARY SCIENCES	NA	NA	7	HEMATOLOGIC AND PLASMA BIOCHEMICAL REFERENCE VALUES FOR THREE SPECIES OF BLACK COCKATOOS (CALYPTORHYNCHUS SPECIES)	ARTICLE	0	16	27	VETERINARY SCIENCES
ISI000326980600029	rejected off topic illegal trade	Ada Sanchez	BEAUFRERE H, 2013, VET PATHOL	BEAUFRERE H;NEVAREZ JG;WAKAMATSU N;CLUBB C;TULLY TN	ANIMAL MODEL OF ATHEROSCLEROSIS; AVIAN ATHEROSCLEROSIS; AVIAN; CARDIOLOGY; PSITTACINE ATHEROSCLEROSIS	WHITE CARNEAU PIGEONS; EARLY ATHEROGENESIS; CORONARY-ARTERY;; CHOLESTEROL; AORTA; LESIONS; PLASMA; HYPERCHOLESTEROLEMIA; ACCUMULATION;; LIPOPROTEINS	BEAUFRERE, H (CORRESPONDING AUTHOR), LOUISIANA STATE UNIV, SCH VET MED, SKIP BERTMAN DR, BATON ROUGE, LA 70808 USA.; BEAUFRERE, H.; NEVAREZ, J. G.; TULLY, T. N., LOUISIANA STATE UNIV, SCH VET MED, DEPT VET CLIN SCI, BATON ROUGE, LA 70808 USA.; WAKAMATSU, N., LOUISIANA STATE UNIV, SCH VET MED, DEPT PATHOBIOL SCI, BATON ROUGE, LA 70808 USA.; CLUBB, S., RAINFOREST CLIN BIRDS \& EXOT, LOXAHATCHEE, FL…	SPONTANEOUS ATHEROSCLEROSIS IS COMMON IN PSITTACIFORMES, AND CLINICAL SIGNS ASSOCIATED WITH FLOW-LIMITING STENOSIS ARE ENCOUNTERED IN PET BIRDS. NEVERTHELESS, A PSITTACINE MODEL OF ATHEROSCLEROSIS HAS NOT BEEN DEVELOPED FOR RESEARCH INVESTIGATIONS. SIXTEEN CAPTIVE-BRED QUAKER PARROTS (MYIOPSITTA MONACHUS) WERE USED IN THIS STUDY. WHILE 4 CONTROL BIRDS WERE FED A MAINTENANCE DIET, 12 OTHER BIRDS W…	2455 TELLER RD, THOUSAND OAKS, CA 91320 USA	NA	H.BEAUFRERE@GMAIL.COM	NA	NA	NA	2020-10-23	252BX	10.1177/0300985813488958	NA	NA	1544-2217	NA	NA	KAYTEE AVIAN FOUNDATION; VCS CORP GRANT (LSU-SVM)	THE AUTHOR(S) DISCLOSED RECEIPT OF THE FOLLOWING FINANCIAL SUPPORT FOR THE RESEARCH, AUTHORSHIP, AND/OR PUBLICATION OF THIS ARTICLE: THIS STUDY WAS FUNDED BY THE KAYTEE AVIAN FOUNDATION AND A VCS CORP GRANT (LSU-SVM).	NA	0300-9858	VET. PATHOL.	VETERINARY PATHOLOGY	ENGLISH	NA	NOV	NA	48	6	NA	CRAY, CAROLYN/0000-0002-7180-153X	NA	1116-1126	SAGE PUBLICATIONS INC	PATHOLOGY; VETERINARY SCIENCES	NA	NA	16	EXPERIMENTAL DIET-INDUCED ATHEROSCLEROSIS IN QUAKER PARROTS (MYIOPSITTA MONACHUS)	ARTICLE	0	26	50	PATHOLOGY; VETERINARY SCIENCES
ISI000327048100003	rejected off topic illegal trade	Ada Sanchez	KUSMIERCZYK J, 2013, J EXOT PET MED	KUSMIERCZYK J;WALL CR;HOPPES S;BUDKE CM;SPAULDING KA	AVIAN; BUTORPHANOL; COMPUTED TOMOGRAPHY; MIDAZOLAM; PSITTACINE; SEDATION	HAWKS BUTEO-JAMAICENSIS; LOWER RESPIRATORY-TRACT; ANATOMY; RADIOGRAPHY;; PSITTACINE; MIDAZOLAM	KUSMIERCZYK, J (CORRESPONDING AUTHOR), CAMERON PK ZOO 1701 NORTH 4TH ST, WACO, TX 76712 USA.; TEXAS A\&M UNIV, COLL VET MED, DEPT SMALL ANIM CLIN SCI, ZOOL MED SERV, COLLEGE STN, TX 77843 USA.; TEXAS A\&M UNIV, COLL VET MED, DEPT LARGE ANIM CLIN SCI, COLLEGE STN, TX 77843 USA.; TEXAS A\&M UNIV, COLL VET MED, DEPT VET INTEGRAT BIOSCI, COLLEGE STN, TX 77843 USA.	COMPUTED TOMOGRAPHY (CT) IS AN INCREASINGLY AVAILABLE AND VALUABLE IMAGING MODALITY FOR THE DIAGNOSIS OF COMPANION AVIAN PETS. PREVIOUSLY, CT STUDIES OF BIRDS REQUIRED GENERAL ANESTHESIA WITH INHALANT ANESTHETICS. OWING TO THE RISKS ASSOCIATED WITH GENERAL ANESTHESIA, THE AUTHORS OF THIS ARTICLE INVESTIGATED THE EFFECT OF SEDATION ON BIRDS DURING A CT EXAMINATION. IN THIS STUDY, 10 PSITTACINE BIR…	STE 800, 230 PARK AVE, NEW YORK, NY 10169 USA	NA	JAMESKU@CI.WACO.TX.US	NA	NA	NA	2020-10-23	252YF	10.1053/j.jepm.2013.08.011	NA	NA	1931-6283	NA	NA	SCHUBOT EXOTIC BIRD HEALTH CENTER	THE AUTHORS WOULD LIKE TO THANK H. CALLIS AND D. MARQUEZ FOR TECHNICAL ASSISTANCE WITH THIS STUDY AND THE SUPPORT RECEIVED BY THE SCHUBOT EXOTIC BIRD HEALTH CENTER.	NA	1557-5063	J. EXOT. PET MED.	JOURNAL OF EXOTIC PET MEDICINE	ENGLISH	NA	JUL	NA	25	3	NA	BUDKE, CHRISTINE/0000-0002-4750-0905	NA	251-257	ELSEVIER SCIENCE INC	VETERINARY SCIENCES	NA	NA	5	COMPARISON OF COMPUTED TOMOGRAPHIC IMAGES OF BIRDS OBTAINED WITH SEDATION VS GENERAL ANESTHESIA	ARTICLE	0	11	22	VETERINARY SCIENCES
ISI000328086200001	rejected off topic illegal trade	JRFP	AMORIM BEZERRA WG, 2013, ACTA SCI VET	AMORIM BEZERRA WG;CARDOSO WM;DE;CASTRO TEIXEIRA RS;VASCONCELOS RH;MACHADO DN;LOPES ES;DE ALBUQUERQUE AH;ROCHA-E-SILVA RC	MELOPSITTACUS UNDULATUS; SALMONELLA SP.; PET STORES	POLYMERASE-CHAIN-REACTION; TYPHIMURIUM; ENRICHMENT; INFECTION; PARAKEET;; POULTRY	BEZERRA, WGA (CORRESPONDING AUTHOR), RUA NADIR SABOYA 666 CASA 03, BR-60833344 FORTALEZA, CEARA, BRAZIL.; AMORIM BEZERRA, WINDLEYANNE GONCALVES; CARDOSO, WILLIAM MACIEL; DE CASTRO TEIXEIRA, REGIS SIQUEIRA; VASCONCELOS, RUBEN HORN; MACHADO, DEBORA NISHI; LOPES, ELISANGELA DE SOUZA; DE ALBUQUERQUE, ATILLA HOLANDA; ROCHA-E-SILVA, ROBERTA CRISTINA, UNIV ESTADUAL CEARA UECE, FAC VET, PROGRAMA POSGRAD …	BACKGROUND: THE BUDGERIGARS (MELOPSITTACUS UNDULATUS) ARE PSITTACINE OF THE PSITTACIDAE FAMILY WHICH BELONGS IN THE PSITTACIFORMES ORDER. THESE BIRDS DO NOT BELONG IN THE FREE LIVING FAUNA OF BRAZIL, THEREFORE ALMOST ALL OF THESE BIRDS FOUND IN THE HOME ENVIRONMENT ARE DERIVED FROM PET STORES OR FREE MARKETS. THE DISSEMINATION OF SALMONELLA AMONG PSITTACINE AND OTHER BIRDS, AND MEN AS WELL, IS A …	FAC VET, CAIXA POSTAL 15017, PORTO ALEGRE RS, 91501-570, BRAZIL	1157	WINDLEYANNE@YAHOO.COM.BR	NA	NA	NA	2020-10-23	267GY	NA	NA	NA	1679-9216	NA	NA	FUNDACAO CEARENSE DE APOIO AO DESENVOLVIMENTO CIENTIFICO E TECNOLOGICO (FUNCAP)	DURING THE EXPERIMENT, THE FIRST AUTHOR HAD A MASTER'S SCHOLARSHIP PROVIDED BY THE FUNDACAO CEARENSE DE APOIO AO DESENVOLVIMENTO CIENTIFICO E TECNOLOGICO (FUNCAP).	NA	1678-0345	ACTA SCI. VET.	ACTA SCIENTIAE VETERINARIAE	ENGLISH	NA	OCT 30	NA	30	NA	NA	NA	NA	NA	UNIV FED RIO GRANDE DO SUL	VETERINARY SCIENCES	NA	NA	2	SURVEY OF SALMONELLA SP IN BUDGERIGARS (MELOPSITTACUS UNDULATUS) IN FORTALEZA, BRAZIL	ARTICLE	0	13	41	VETERINARY SCIENCES
ISI000328247600009	included in review	Ada Sanchez	COLLARD RC, 2014, ANN ASSOC AM GEOGR	COLLARD RC	COMMODIFICATION; DECOMMODIFICATION; GLOBAL LIVE WILDLIFE TRADE;; HUMAN-ANIMAL RELATIONS; WILDLIFE REHABILITATION	WILD; GEOGRAPHY; TRADE; SPACE	COLLARD, RC (CORRESPONDING AUTHOR), UNIV TORONTO, DEPT GEOG, TORONTO, ON M5S 3G3, CANADA.; UNIV TORONTO, DEPT GEOG, TORONTO, ON M5S 3G3, CANADA.	EACH YEAR ARCAS WILDLIFE REHABILITATION CENTER IN NORTHERN GUATEMALA RECEIVES 200 TO 700 ANIMALS: CARDBOARD BOXES STUFFED WITH BABY PARROTS, CRATES FULL OF LIZARDS, MONKEYS WITH LEASHES RINGING THEIR NECKS. MANY OF THESE ANIMALS WERE CONFISCATED WHILE BEING SMUGGLED FOR THE PET TRADE. SEIZED ANIMALS REPRESENT A FRACTION OF OVERALL TRADE (LEGAL AND ILLEGAL) IN AND OUT OF GUATEMALA AND OF GLOBAL TR…	2-4 PARK SQUARE, MILTON PARK, ABINGDON OX14 4RN, OXON, ENGLAND	NA	ROSEMARY.COLLARD@UTORONTO.CA	NA	NA	NA	2020-10-23	269NI	10.1080/00045608.2013.847750	NA	NA	1467-8306	NA	NA	NA	NA	NA	0004-5608	ANN. ASSOC. AM. GEOGR.	ANNALS OF THE ASSOCIATION OF AMERICAN GEOGRAPHERS	ENGLISH	NA	JAN 2	NA	84	1	NA	NA	NA	151-165	ROUTLEDGE JOURNALS, TAYLOR \& FRANCIS LTD	GEOGRAPHY	NA	NA	57	PUTTING ANIMALS BACK TOGETHER, TAKING COMMODITIES APART	ARTICLE	0	62	104	GEOGRAPHY
ISI000328804300049	rejected off topic illegal trade	Ada Sanchez	TELLA JL, 2013, BIOL CONSERV	TELLA JL;ROJAS A;CARRETE M;HIRALDO F	ARA RUBROGENYS; IUCN RED LIST; MVP; NON-BREEDING POPULATIONS; POPULATION; STRUCTURE; SAFE INDEX	ENDANGERED VULTURE; SAFE INDEX; SIZE; HABITAT; PARROTS; BIODIVERSITY;; EXTINCTION; PATTERNS; SURVIVAL; BIOLOGY	TELLA, JL (CORRESPONDING AUTHOR), CSIC, ESTN BIOL DONANA, DEPT CONSERVAT BIOL, AVDA AMERICO VESPUCIO S-N, SEVILLE 41092, SPAIN.; TELLA, J. L.; HIRALDO, F., CSIC, ESTN BIOL DONANA, DEPT CONSERVAT BIOL, SEVILLE 41092, SPAIN.; ROJAS, A., UNIV AUTONOMA GABRIEL RENE MORENO, MUSEO HIST NAT NOEL KEMPFF MERCADO, SANTA CRUZ, BOLIVIA.; CARRETE, M., UNIV PABLO DE OLAVIDE, SEVILLE 41013, SPAIN.	THE IUCN RED LIST IS CHALLENGED WITH ASSESSING THE CONSERVATION STATUS OF SPECIES ON WHICH RELIABLE DEMOGRAPHIC AND DISTRIBUTION PARAMETERS ARE LACKING. THE HOTLY DEBATED SAFE INDEX, HOWEVER, MEASURES THE ``SPECIES' ABILITY TO FORESTALL EXTINCTION'' AND ONLY REQUIRES INFORMATION ON POPULATION SIZE. NONETHELESS, BOTH CONSERVATION ASSESSMENT SYSTEMS NEGLECT THE ROLE OF NON-BREEDING POPULATION FRACT…	THE BOULEVARD, LANGFORD LANE, KIDLINGTON, OXFORD OX5 1GB, OXON, ENGLAND	NA	TELLA@EBD.CSIC.ES	NA	NA	NA	2020-10-23	277FL	10.1016/j.biocon.2013.08.035	NA	NA	1873-2917	NA	NA	ZOO DE BARCELONA AND BIORENA; JUNTA DE ANDALUCIAJUNTA DE ANDALUCIA [PAI RNM107]; FUNDACION BIODIVERSIDAD	WE THANK E. PACIFICO, H. GARRIDO, A. REQUEJO, I. VERA, R. ROJAS, J. PACA, G. FLORES, S. HUICI, E. YUCRA AND D. ALBERTO FOR FIELD-WORK ASSISTANCE, I. AFAN AND D. ARAGONES FOR THEIR HELP AT THE GIS LAB, AND ESPECIALLY A. REQUEJO FOR INSPIRING THIS COLLABORATIVE WORK. M. GALETTI AND FOUR ANONYMOUS REVIEWERS HELPED TO IMPROVE THE MANUSCRIPT. FUNDING WAS PROVIDED BY ZOO DE BARCELONA AND BIORENA (JANUA…	NA	0006-3207	BIOL. CONSERV.	BIOLOGICAL CONSERVATION	ENGLISH	NA	NOV	NA	62	NA	NA	TELLA, JOSE L/0000-0002-3038-7424 CARRETE, MARTINA/0000-0002-0491-2950	NA	425-434	ELSEVIER SCI LTD	BIODIVERSITY \& CONSERVATION; ENVIRONMENTAL SCIENCES \& ECOLOGY	TELLA, JOSE L/I-3707-2015 HIRALDO, FERNANDO/AAA-8314-2019 CARRETE, MARTINA/D-2618-2017 CARRETE, MARTINA/A-6376-2009	NA	27	SIMPLE ASSESSMENTS OF AGE AND SPATIAL POPULATION STRUCTURE CAN AID CONSERVATION OF POORLY KNOWN SPECIES	ARTICLE	0	53	167	BIODIVERSITY CONSERVATION; ECOLOGY; ENVIRONMENTAL SCIENCES
[truncated: 301 more rows]
[truncated: 28 more columns]

## Sheet: Review_information
ref_id	status	reviewed_by	iso2	action	contribution	trade_chain	aims	action_type	country_role	name	iso_3166.2	region	sub.region	intermediate.region
AY0000000000000002	included in review	Ada Sanchez	ID	extraction scope	basic knowledge	Transational	Identify network actors	Extraction dynamic	Study location	Indonesia	ISO 3166-2:ID	Asia	South-eastern Asia
AY0000000000000005	included in review	Ada Sanchez	BO	extraction amount	basic knowledge	Transational	Identify network actors	Extraction dynamic	Study location	Bolivia (Plurinational State of)	ISO 3166-2:BO	Americas	Latin America and the Caribbean	South America
AY0000000000000014	included in review	Ada Sanchez	MX	import/export dynamic	basic knowledge	Transational	Identify network actors	Market dynamic	Study location	Mexico	ISO 3166-2:MX	Americas	Latin America and the Caribbean	Central America
AY0000000000000027	included in review	Ada Sanchez	TW	local market dynamic	basic knowledge	Transational	Identify network actors	Market dynamic	Study location	Taiwan, Province of China	ISO 3166-2:TW	Asia	Eastern Asia
AY0000000000000030	included in review	Ada Sanchez	BR	import/export dynamic	basic knowledge	Transational	Identify network actors	Market dynamic	Study location	Brazil	ISO 3166-2:BR	Americas	Latin America and the Caribbean	South America
[truncated: 170 more rows]

## Sheet: Species_list
ref_id	scientific_name	english_name	family	iucn	TaxonId	Kingdom	Phylum	Class	Order	Family	Genus	Species	Subspecies	RankName	CurrentListing	SynonymsWithAuthors	CitesAccepted	All.AF8.DistributionISOCodes	All.AF8.DistributionFullNames	NativeDistributionFullNames	Introduced.AF8.Distribution
[truncated: 667 more rows]
